# Supplementary material
Source: Research Square preprint supplement (doi:10.21203/rs.3.rs-9115348/v1)
Supplement: Supplementary file 1 [file 01a1e14e936d2df3ad3ee766.xlsx]

## Sheet: annotated_df_gill
	gene_id	logFC	logCPM	PValue	FDR	Scaffold_ID	Start	End	gene_name	InterPro_Annot	InterPro_GO_Terms	sma3s_name	sma3s_Annot
1.Adra_g15712	g15712	13.0033826600047	4.18241008518515	2.21419559436159e-13	4.88218715177377e-11	Scaffold_669	21702	26164	NA	IPR023341 MABP domain	-	NA	NA
2.Adra_g63879	g63879	12.9392993089855	4.11851650998662	5.96860512501121e-14	1.34375290961831e-11	Scaffold_2669	7183	10399	NA	IPR023341 MABP domain	-	NA	NA
3.Adra_g28275	g28275	12.2977829031914	3.48272333070107	4.51267815726108e-07	3.00676512235202e-05	Scaffold_1285	985013	998037	NA	IPR013106 Immunoglobulin V-set domain;IPR003599 Immunoglobulin subtype;IPR003598 Immunoglobulin subtype 2;IPR013783 Immunoglobulin-like fold;IPR013270 CD47 immunoglobulin-like;IPR007110 Immunoglobulin-like domain;IPR036179 Immunoglobulin-like domain superfamily	-	NA	NA
4.Adra_g34432	g34432	11.8499971216919	3.0337847989665	1.07113541665501e-46	3.27277775591675e-43	Scaffold_1553	28399	44346	NA	IPR013106 Immunoglobulin V-set domain;IPR003599 Immunoglobulin subtype;IPR013783 Immunoglobulin-like fold;IPR007110 Immunoglobulin-like domain;IPR036179 Immunoglobulin-like domain superfamily	-	NA	NA
5.Adra_g34428_HSPA12A	g34428	11.6523316768456	2.83748354261047	8.29431963115444e-34	1.10874317669457e-30	Scaffold_1553	13988	14709	HSPA12A	IPR043129 ATPase, nucleotide binding domain	-	Heat shock 70 kDa protein 12A	NA
6.Adra_g18473	g18473	10.5435181932404	1.74108195169984	7.5815072567395e-39	1.62153277207144e-35	Scaffold_750	257144	261558	NA	IPR000477 Reverse transcriptase domain;IPR041588 Integrase zinc-binding domain;IPR001584 Integrase, catalytic core;IPR041577 Reverse transcriptase/retrotransposon-derived protein, RNase H-like domain;IPR036397 Ribonuclease H superfamily;IPR043128 Reverse transcriptase/Diguanylate cyclase domain;IPR012337 Ribonuclease H-like superfamily;IPR043502 DNA/RNA polymerase superfamily	go_process:GO:0015074 DNA integration;go_function:GO:0003676 nucleic acid binding	NA	NA
7.Adra_g33543_C3	g33543	10.0722180590977	1.27012524263434	8.15898036138005e-07	5.20908274534915e-05	Scaffold_1492	59326	59811	C3	IPR013106 Immunoglobulin V-set domain;IPR003599 Immunoglobulin subtype;IPR013783 Immunoglobulin-like fold;IPR007110 Immunoglobulin-like domain;IPR036179 Immunoglobulin-like domain superfamily	-	Ig heavy chain Mem5	adaptive immune response;receptor-mediated endocytosis;phagocytosis, recognition;phagocytosis, engulfment;immune response;complement activation;complement activation, classical pathway;regulation of complement activation;Fc-epsilon receptor signaling pathway;Fc-gamma receptor signaling pathway involved in phagocytosis;defense response to bacterium;innate immune response;regulation of immune respo…
8.Adra_g10525	g10525	9.97118822204313	1.16182456167966	2.20886417264629e-05	0.000860138010606488	Scaffold_458	185695	215161	NA	IPR013106 Immunoglobulin V-set domain;IPR003599 Immunoglobulin subtype;IPR041373 Reverse transcriptase, RNase H-like domain;IPR013783 Immunoglobulin-like fold;IPR043128 Reverse transcriptase/Diguanylate cyclase domain;IPR007110 Immunoglobulin-like domain;IPR043502 DNA/RNA polymerase superfamily;IPR036179 Immunoglobulin-like domain superfamily	-	NA	NA
9.Adra_g64771_TMEM3	g64771	9.60964640343667	3.86539747792473	3.83218582760606e-22	2.48372092366177e-19	Scaffold_2702	2075323	2076255	TMEM3	IPR002659 Glycosyl transferase, family 31	go_function:GO:0016758 transferase activity, transferring hexosyl groups;go_component:GO:0016020 membrane;go_process:GO:0006486 protein glycosylation	BGnT-7	protein glycosylation;axon guidance;sensory perception of smell;glycoprotein biosynthetic process;O-glycan processing;O-glycan processing, core 3;keratan sulfate biosynthetic process;poly-N-acetyllactosamine biosynthetic process;cellular response to leukemia inhibitory factor
10.Adra_g29838	g29838	9.45965297011318	0.661781730896063	1.07349760561142e-06	6.54130107943503e-05	Scaffold_1340	655974	661727	NA	IPR013783 Immunoglobulin-like fold	-	NA	NA
11.Adra_g33822	g33822	9.44003366596542	0.665509088278669	3.09553047175095e-18	1.1221560293188e-15	Scaffold_1512	617308	621794	NA	IPR008361 Melanin-concentrating hormone receptor;IPR000276 G protein-coupled receptor, rhodopsin-like;IPR017452 GPCR, rhodopsin-like, 7TM	go_component:GO:0016021 integral component of membrane;go_process:GO:0007186 G protein-coupled receptor signaling pathway;go_function:GO:0004930 G protein-coupled receptor activity	NA	NA
12.Adra_g23953	g23953	9.43029226138648	0.656157821209923	5.48611514165864e-18	1.95561717749658e-15	Scaffold_1073	5382355	5386865	NA	IPR008361 Melanin-concentrating hormone receptor;IPR000276 G protein-coupled receptor, rhodopsin-like;IPR017452 GPCR, rhodopsin-like, 7TM	go_component:GO:0016021 integral component of membrane;go_process:GO:0007186 G protein-coupled receptor signaling pathway;go_function:GO:0004930 G protein-coupled receptor activity	NA	NA
13.Adra_g43078	g43078	8.82347196201996	0.0975215789019802	7.83157854036795e-06	0.000354126430912029	Scaffold_1925	50275	66639	NA	IPR013783 Immunoglobulin-like fold;IPR036179 Immunoglobulin-like domain superfamily	-	NA	NA
14.Adra_g56487	g56487	8.79090127909615	0.0368283402093133	8.35238373047661e-08	6.69066603848066e-06	Scaffold_2414	139291	177526	NA	IPR000569 HECT domain;IPR035983 HECT, E3 ligase catalytic domain	go_function:GO:0004842 ubiquitin-protein transferase activity	NA	NA
15.Adra_g41327_aga	g41327	8.77795251206539	6.81727753385899	9.18588101986973e-08	7.3308814646632e-06	Scaffold_1879	5071120	5077760	aga	IPR006035 Ureohydrolase;IPR014033 Arginase;IPR020855 Ureohydrolase, manganese-binding site;IPR023696 Ureohydrolase domain superfamily	go_function:GO:0046872 metal ion binding;go_process:GO:0006525 arginine metabolic process;go_function:GO:0004053 arginase activity;go_function:GO:0016813 hydrolase activity, acting on carbon-nitrogen (but not peptide) bonds, in linear amidines	Arginase-1	urea cycle;ureteric bud development;response to hypoxia;liver development;positive regulation of endothelial cell proliferation;adaptive immune response;negative regulation of type 2 immune response;arginine metabolic process;arginine catabolic process;nitric oxide biosynthetic process;striated muscle contraction;midgut development;female pregnancy;aging;response to nutrient;response to wounding;…
16.Adra_g72669	g72669	8.52663890367878	-0.210161537929519	3.71429165655385e-15	9.93015874379672e-13	Scaffold_3005	209643	211916	NA	IPR041588 Integrase zinc-binding domain;IPR001584 Integrase, catalytic core;IPR036397 Ribonuclease H superfamily;IPR012337 Ribonuclease H-like superfamily	go_process:GO:0015074 DNA integration;go_function:GO:0003676 nucleic acid binding	NA	NA
17.Adra_g67588	g67588	8.46341785483605	-0.265409633565383	4.61088171436367e-16	1.38897940995507e-13	Scaffold_2812	490188	494017	NA	IPR043128 Reverse transcriptase/Diguanylate cyclase domain;IPR000477 Reverse transcriptase domain;IPR041588 Integrase zinc-binding domain;IPR036397 Ribonuclease H superfamily;IPR041577 Reverse transcriptase/retrotransposon-derived protein, RNase H-like domain;IPR001584 Integrase, catalytic core;IPR043502 DNA/RNA polymerase superfamily;IPR012337 Ribonuclease H-like superfamily	go_function:GO:0003676 nucleic acid binding;go_process:GO:0015074 DNA integration	NA	NA
18.Adra_g57223	g57223	8.45105293124794	-0.264248804379693	4.40225480994831e-14	1.0346750096173e-11	Scaffold_2438	377180	378733	NA	IPR000477 Reverse transcriptase domain	-	NA	NA
19.Adra_g60147_tsc	g60147	8.34680432827096	6.0373394841266	9.80265892520794e-06	0.000427004621369343	Scaffold_2541	2931	23036	tsc	IPR004841 Amino acid permease/ SLC12A domain;IPR018491 SLC12A transporter, C-terminal	go_process:GO:0055085 transmembrane transport;go_component:GO:0016020 membrane;go_process:GO:0006811 ion transport;go_function:GO:0022857 transmembrane transporter activity	Na-Cl symporter	ion transport;potassium ion transport;sodium ion transport;chloride transport;cell volume homeostasis;sodium ion transmembrane transport;chloride ion homeostasis;potassium ion homeostasis;sodium ion homeostasis;renal sodium ion absorption;inorganic cation import across plasma membrane;chloride transmembrane transport;potassium ion import across plasma membrane
20.Adra_g43077	g43077	8.16944785465521	-0.514851043881705	1.27453539749908e-10	1.89303910289656e-08	Scaffold_1925	31211	37150	NA	IPR041588 Integrase zinc-binding domain;IPR036397 Ribonuclease H superfamily;IPR040676 Domain of unknown function DUF5641;IPR008042 Retrotransposon, Pao;IPR043128 Reverse transcriptase/Diguanylate cyclase domain;IPR001584 Integrase, catalytic core;IPR012337 Ribonuclease H-like superfamily;IPR043502 DNA/RNA polymerase superfamily	go_function:GO:0003676 nucleic acid binding;go_process:GO:0015074 DNA integration	NA	NA
1.March_g17026_cyc	g17026	-13.4960615321125	4.67577784163596	5.88668123104753e-67	4.19681127232148e-63	Scaffold_710	1527347	1547342	cyc	IPR002327 Cytochrome c, class IA/ IB;IPR008160 Collagen triple helix repeat;IPR009056 Cytochrome c-like domain;IPR011936 Myxococcus cysteine-rich repeat;IPR036909 Cytochrome c-like domain superfamily	go_function:GO:0009055 electron transfer activity;go_function:GO:0020037 heme binding	Cytochrome c	acetylcholine catabolic process in synaptic cleft;osteoblast differentiation;tissue homeostasis;chondrocyte differentiation;response to ischemia;mitochondrial electron transport, ubiquinol to cytochrome c;mitochondrial electron transport, cytochrome c to oxygen;apoptotic process;activation of cysteine-type endopeptidase activity involved in apoptotic process;sperm individualization;regulation of …
2.March_g14360	g14360	-12.2653640256369	3.45143253976258	2.51807779766245e-99	5.38566479364045e-95	Scaffold_625	2344466	2348305	NA	IPR033214 A-kinase-interacting protein 1	go_process:GO:1901222 regulation of NIK/NF-kappaB signaling	NA	NA
3.March_g40972	g40972	-10.8933249473776	2.09815661526254	3.9632315262148e-07	2.68245556590766e-05	Scaffold_1871	40373	40812	NA	IPR013106 Immunoglobulin V-set domain;IPR013783 Immunoglobulin-like fold;IPR007110 Immunoglobulin-like domain;IPR036179 Immunoglobulin-like domain superfamily	-	NA	NA
4.March_g8905_xlrs1	g8905	-10.0606611726581	1.28242202798769	1.28303894116803e-05	0.00053596947018949	Scaffold_364	2689779	2696595	xlrs1	IPR000421 Coagulation factor 5/8 C-terminal domain;IPR008979 Galactose-binding-like domain superfamily	-	Retinoschisin	angiogenesis;phagocytosis, recognition;phagocytosis, engulfment;cell adhesion;multicellular organism development;single fertilization;visual perception;retina layer formation;adaptation of rhodopsin mediated signaling;apoptotic cell clearance;post-translational protein modification;cellular protein metabolic process;positive regulation of phagocytosis;response to stimulus;protein homooligomerizat…
5.March_g69711	g69711	-9.68982106454995	0.927890308395241	1.14114857544166e-25	1.06116894484984e-22	Scaffold_2890	753163	757058	NA	IPR006120 Resolvase, HTH domain;IPR012337 Ribonuclease H-like superfamily	go_function:GO:0003677 DNA binding;go_process:GO:0006310 DNA recombination;go_function:GO:0000150 DNA strand exchange activity	NA	NA
6.March_g48007	g48007	-9.67641985926042	0.916477525729724	2.55119350502549e-25	2.27353861189522e-22	Scaffold_2111	1026085	1030083	NA	IPR000477 Reverse transcriptase domain;IPR043502 DNA/RNA polymerase superfamily	-	NA	NA
7.March_g5437	g5437	-9.24338255445574	0.502925172576608	9.12623213821771e-21	5.0049193069795e-18	Scaffold_231	2972294	2975131	NA	IPR036397 Ribonuclease H superfamily;IPR012337 Ribonuclease H-like superfamily	go_function:GO:0003676 nucleic acid binding	NA	NA
8.March_g51042	g51042	-9.24338255445574	0.502925172576608	9.12623213821771e-21	5.0049193069795e-18	Scaffold_2228	1332570	1335407	NA	IPR036397 Ribonuclease H superfamily;IPR012337 Ribonuclease H-like superfamily	go_function:GO:0003676 nucleic acid binding	NA	NA
9.March_g9266	g9266	-9.16367248865107	0.429411338255051	1.5714395475251e-18	6.00177661472623e-16	Scaffold_385	3058307	3062914	NA	IPR025398 Domain of unknown function DUF4371;IPR012337 Ribonuclease H-like superfamily	-	NA	NA
10.March_g52133	g52133	-9.16333829054948	0.416939063291958	1.21997265049822e-07	9.52291060177227e-06	Scaffold_2269	75195	81380	NA	IPR041577 Reverse transcriptase/retrotransposon-derived protein, RNase H-like domain;IPR036397 Ribonuclease H superfamily;IPR000477 Reverse transcriptase domain;IPR026523 Paraneoplastic antigen Ma;IPR001584 Integrase, catalytic core;IPR043128 Reverse transcriptase/Diguanylate cyclase domain;IPR041588 Integrase zinc-binding domain;IPR001969 Aspartic peptidase, active site;IPR043502 DNA/RNA polymer…	go_function:GO:0003676 nucleic acid binding;go_process:GO:0015074 DNA integration;go_process:GO:0006508 proteolysis;go_function:GO:0004190 aspartic-type endopeptidase activity	NA	NA
11.March_g64342	g64342	-8.84978966564639	4.18528053669453	1.88953353305107e-14	4.54082507920183e-12	Scaffold_2687	36729	37550	NA	IPR036397 Ribonuclease H superfamily;IPR002156 Ribonuclease H domain	go_function:GO:0003676 nucleic acid binding;go_function:GO:0004523 RNA-DNA hybrid ribonuclease activity	NA	NA
12.March_g31933	g31933	-8.41521794755593	-0.259973697963098	4.17799166830587e-10	5.76508940656296e-08	Scaffold_1412	4941486	4948901	NA	IPR036397 Ribonuclease H superfamily;IPR001584 Integrase, catalytic core;IPR000477 Reverse transcriptase domain;IPR041577 Reverse transcriptase/retrotransposon-derived protein, RNase H-like domain;IPR041588 Integrase zinc-binding domain;IPR043128 Reverse transcriptase/Diguanylate cyclase domain;IPR012337 Ribonuclease H-like superfamily;IPR043502 DNA/RNA polymerase superfamily	go_function:GO:0003676 nucleic acid binding;go_process:GO:0015074 DNA integration	NA	NA
13.March_g55176	g55176	-8.31744541643722	-0.339288272537357	2.68373484990892e-09	3.10268761999199e-07	Scaffold_2370	594263	603196	NA	IPR036691 Endonuclease/exonuclease/phosphatase superfamily	-	NA	NA
14.March_g53774	g53774	-8.22828714403871	-0.426249644746397	9.71803931198886e-09	9.94494855525444e-07	Scaffold_2330	1510769	1516735	NA	IPR041588 Integrase zinc-binding domain;IPR036397 Ribonuclease H superfamily;IPR008042 Retrotransposon, Pao;IPR000477 Reverse transcriptase domain;IPR040676 Domain of unknown function DUF5641;IPR005312 Protein of unknown function DUF1759;IPR043128 Reverse transcriptase/Diguanylate cyclase domain;IPR001584 Integrase, catalytic core;IPR012337 Ribonuclease H-like superfamily;IPR043502 DNA/RNA polyme…	go_function:GO:0003676 nucleic acid binding;go_process:GO:0015074 DNA integration	NA	NA
15.March_g56658	g56658	-8.18811321347489	-0.464230214082616	6.98562017618701e-10	9.01271404059903e-08	Scaffold_2423	1430296	1435054	NA	IPR036397 Ribonuclease H superfamily;IPR001584 Integrase, catalytic core;IPR041588 Integrase zinc-binding domain;IPR012337 Ribonuclease H-like superfamily	go_function:GO:0003676 nucleic acid binding;go_process:GO:0015074 DNA integration	NA	NA
16.March_g7070	g7070	-8.12228509928071	-0.546970117535525	4.14448154946365e-06	0.000200547899049612	Scaffold_304	1945997	1952556	NA	IPR001584 Integrase, catalytic core;IPR043128 Reverse transcriptase/Diguanylate cyclase domain;IPR041577 Reverse transcriptase/retrotransposon-derived protein, RNase H-like domain;IPR026523 Paraneoplastic antigen Ma;IPR036397 Ribonuclease H superfamily;IPR041588 Integrase zinc-binding domain;IPR000477 Reverse transcriptase domain;IPR001969 Aspartic peptidase, active site;IPR012337 Ribonuclease H-…	go_process:GO:0015074 DNA integration;go_function:GO:0003676 nucleic acid binding;go_process:GO:0006508 proteolysis;go_function:GO:0004190 aspartic-type endopeptidase activity	NA	NA
17.March_g14831_JBTS17	g14831	-8.02006112299225	-0.608962337254291	4.86742783493374e-10	6.50653415834768e-08	Scaffold_629	3904777	3916407	JBTS17	IPR028236 Ciliogenesis and planar polarity effector 1;IPR036322 WD40-repeat-containing domain superfamily	go_function:GO:0005515 protein binding	Ciliogenesis and planar polarity effector 1	establishment of planar polarity;kidney development;cardiac septum development;ventricular septum development;heart development;cerebellum development;embryonic digit morphogenesis;roof of mouth development;cilium assembly;coronary vasculature development;protein localization to ciliary transition zone
18.March_g59401	g59401	-7.9784000114024	0.876244438827069	8.74656148967408e-23	6.03456313358546e-20	Scaffold_2523	1315372	1316103	NA	IPR004244 Transposase, L1	-	NA	NA
19.March_g53000	g53000	-7.94761431161536	2.45823391838397	1.31097680160796e-18	5.09803124232564e-16	Scaffold_2301	6919	18128	NA	IPR001660 Sterile alpha motif domain;IPR011990 Tetratricopeptide-like helical domain superfamily;IPR013761 Sterile alpha motif/pointed domain superfamily	go_function:GO:0005515 protein binding	NA	NA
20.March_g15261	g15261	-7.94473192014992	-0.679458455838637	1.02470691238937e-08	1.03379393595207e-06	Scaffold_644	2316666	2322632	NA	IPR000477 Reverse transcriptase domain;IPR043128 Reverse transcriptase/Diguanylate cyclase domain;IPR041588 Integrase zinc-binding domain;IPR005312 Protein of unknown function DUF1759;IPR036397 Ribonuclease H superfamily;IPR040676 Domain of unknown function DUF5641;IPR008042 Retrotransposon, Pao;IPR001584 Integrase, catalytic core;IPR043502 DNA/RNA polymerase superfamily;IPR012337 Ribonuclease H-…	go_function:GO:0003676 nucleic acid binding;go_process:GO:0015074 DNA integration	NA	NA

## Sheet: annotated_df_stomach
	gene_id	logFC	logCPM	PValue	FDR	AT30482_2	AT30483_2	AT30484_2	AT30485_2	AT30487_2	AT30488_2	AT30489_2	AT30490_2	AT30493_2	AT30494_2	AT30495_2	AT30496_2	AT30503_2	AT30504_2	AT30505_2	AT30506_2	Scaffold_ID	Start	End	gene_name	InterPro_Annot	InterPro_GO_Terms	sma3s_name	sma3s_Annot
1.Adra_g34428_HSPA12A	g34428	9.92786333513885	1.07551209626721	2.95318492768826e-06	0.0009877385243487	0	0	12	6	0	13	0	0	0	0	0	0	18	42	535	17	Scaffold_1553	13988	14709	HSPA12A	IPR043129 ATPase, nucleotide binding domain	-	Heat shock 70 kDa protein 12A	NA
2.Adra_g18473	g18473	9.87627445983997	1.01997772629144	1.84214816302024e-09	1.88083327444367e-06	0	0	0	2	0	0	0	0	0	0	0	0	189	66	131	46	Scaffold_750	257144	261558	NA	IPR000477 Reverse transcriptase domain;IPR041588 Integrase zinc-binding domain;IPR001584 Integrase, catalytic core;IPR041577 Reverse transcriptase/retrotransposon-derived protein, RNase H-like domain;IPR036397 Ribonuclease H superfamily;IPR043128 Reverse transcriptase/Diguanylate cyclase domain;IPR012337 Ribonuclease H-like superfamily;IPR043502 DNA/RNA polymerase superfamily	go_process:GO:0015074 DNA integration;go_function:GO:0003676 nucleic acid binding	NA	NA
3.Adra_g42904	g42904	9.20865017199732	0.382273766517535	3.9138388317429e-08	2.71159141060644e-05	433	119	28	10	47	500	10	20	0	0	0	0	14	44	168	126	Scaffold_1909	4936	8697	NA	IPR043129 ATPase, nucleotide binding domain	-	NA	NA
4.Adra_g11753_Pdzd4	g11753	8.83642902251669	0.0355175912671521	7.88740157895546e-07	0.000340017118289238	18	16	6	12	30	8	0	10	0	0	0	0	84	15	15	167	Scaffold_494	2210721	2219721	Pdzd4	IPR001478 PDZ domain;IPR036034 PDZ superfamily	go_function:GO:0005515 protein binding	PDZ domain-containing protein 4	NA
5.Adra_g72669	g72669	8.57214129809927	-0.221470247329708	2.75533620090571e-06	0.000937732753708243	10	3	0	0	0	0	0	0	0	0	0	0	80	28	48	13	Scaffold_3005	209643	211916	NA	IPR041588 Integrase zinc-binding domain;IPR001584 Integrase, catalytic core;IPR036397 Ribonuclease H superfamily;IPR012337 Ribonuclease H-like superfamily	go_process:GO:0015074 DNA integration;go_function:GO:0003676 nucleic acid binding	NA	NA
6.Adra_g70652_NCL3	g70652	7.94715017034638	2.35309125455929	4.15698276342184e-11	6.20317758674002e-08	739	568	34	15	62	158	3	0	0	0	0	4	486	151	203	350	Scaffold_2930	851240	868371	NCL3	IPR022684 Peptidase C2, calpain family;IPR000008 C2 domain;IPR022683 Peptidase C2, calpain, domain III;IPR001300 Peptidase C2, calpain, catalytic domain;IPR035892 C2 domain superfamily;IPR022682 Peptidase C2, calpain, large subunit, domain III;IPR000169 Cysteine peptidase, cysteine active site;IPR038765 Papain-like cysteine peptidase superfamily;IPR036213 Calpain large subunit, domain III superfa…	go_process:GO:0006508 proteolysis;go_function:GO:0004198 calcium-dependent cysteine-type endopeptidase activity	Calpain-5	ovarian follicle development;luteinization;proteolysis;signal transduction;granulosa cell differentiation
7.Adra_g16629	g16629	7.13913516991707	2.03342880912292	2.45892466629802e-07	0.00012230943487568	834	922	40	100	271	1325	0	30	0	0	0	6	69	74	282	962	Scaffold_701	163532	175017	NA	IPR011665 Brf1, TBP-binding domain	-	NA	NA
8.Adra_g42086_LRGUK	g42086	4.79451650911755	0.833253426153182	8.49715933169483e-07	0.000358339986685974	153	8	87	115	8	21	54	0	0	4	3	5	149	24	141	148	Scaffold_1904	1948457	1984081	LRGUK	IPR008145 Guanylate kinase/L-type calcium channel beta subunit;IPR008042 Retrotransposon, Pao;IPR036397 Ribonuclease H superfamily;IPR040676 Domain of unknown function DUF5641;IPR041588 Integrase zinc-binding domain;IPR032675 Leucine-rich repeat domain superfamily;IPR001611 Leucine-rich repeat;IPR008144 Guanylate kinase-like domain;IPR001584 Integrase, catalytic core;IPR012337 Ribonuclease H-like…	go_function:GO:0003676 nucleic acid binding;go_function:GO:0005515 protein binding;go_process:GO:0015074 DNA integration	Leucine-rich repeat and guanylate kinase domain-containing protein	spermatogenesis;cell differentiation;axoneme assembly
1.March_g53000	g53000	-12.2447237250368	3.35152871125634	1.38004485139351e-11	2.23095750601522e-08	44	4	9	25	0	25	229	22	586	39	196	1277	0	0	0	0	Scaffold_2301	6919	18128	NA	IPR001660 Sterile alpha motif domain;IPR011990 Tetratricopeptide-like helical domain superfamily;IPR013761 Sterile alpha motif/pointed domain superfamily	go_function:GO:0005515 protein binding	NA	NA
2.March_g17397	g17397	-11.4342670497071	2.54764016549838	7.89739827626472e-21	1.53201629161259e-16	29	2	150	38	82	22	76	0	235	174	412	340	0	0	0	0	Scaffold_716	3778356	3787148	NA	IPR006703 AIG1-type guanine nucleotide-binding (G) domain	go_function:GO:0005525 GTP binding	NA	NA
3.March_g62422	g62422	-11.0585592894721	2.17647923811427	7.60251187086967e-18	4.91603759276669e-14	0	0	0	0	42	11	6	50	164	274	146	284	0	0	0	0	Scaffold_2618	85194	88689	NA	IPR036397 Ribonuclease H superfamily;IPR038717 Tc1-like transposase, DDE domain	go_function:GO:0003676 nucleic acid binding	Transposable element Barney transposase	transposition, DNA-mediated;DNA integration
4.March_g22333	g22333	-10.9066975515888	2.02694462410345	1.84596969373637e-15	5.96832768146529e-12	0	0	0	0	47	0	10	39	165	68	294	299	0	0	0	0	Scaffold_992	292448	293650	NA	IPR003879 Butyrophylin-like, SPRY domain;IPR006574 SPRY-associated;IPR001841 Zinc finger, RING-type;IPR000315 B-box-type zinc finger;IPR043136 B30.2/SPRY domain superfamily;IPR013083 Zinc finger, RING/FYVE/PHD-type;IPR017907 Zinc finger, RING-type, conserved site;IPR001870 B30.2/SPRY domain;IPR013320 Concanavalin A-like lectin/glucanase domain superfamily	go_function:GO:0008270 zinc ion binding	NA	NA
5.March_g17385_IAN7	g17385	-10.5476565671973	5.58926755653325	1.52509163006288e-19	1.47926262657949e-15	77	43	587	235	760	212	365	15	1967	1781	2042	3883	0	0	9	0	Scaffold_716	3698466	3705078	IAN7	IPR006703 AIG1-type guanine nucleotide-binding (G) domain;IPR027417 P-loop containing nucleoside triphosphate hydrolase	go_function:GO:0005525 GTP binding	GTPase IMAP family member 7	GTP metabolic process
6.March_g46986	g46986	-10.2741020452782	1.406060509882	1.01092935380276e-10	1.22568865840124e-07	0	0	4	6	0	0	0	0	40	264	95	97	0	0	0	0	Scaffold_2072	385670	391498	NA	IPR029526 PiggyBac transposable element-derived protein	-	NA	NA
7.March_g22332	g22332	-9.88443589212027	1.02718673324912	3.43817357128501e-13	8.33714113866975e-10	0	0	0	0	31	0	0	34	82	63	113	139	0	0	0	0	Scaffold_992	289979	290393	NA	IPR043136 B30.2/SPRY domain superfamily;IPR001870 B30.2/SPRY domain;IPR013320 Concanavalin A-like lectin/glucanase domain superfamily	-	NA	NA
8.March_g29831	g29831	-9.66298704796096	0.814704655162708	2.88294576477322e-07	0.000139815662227089	0	0	0	1	5	0	0	2	31	34	269	21	0	0	0	0	Scaffold_1340	565681	583197	NA	IPR038717 Tc1-like transposase, DDE domain;IPR029526 PiggyBac transposable element-derived protein;IPR036397 Ribonuclease H superfamily	go_function:GO:0003676 nucleic acid binding	NA	NA
9.March_g7070	g7070	-9.03703850641163	0.215031690081542	4.3044336879972e-09	3.89254489251544e-06	0	5	0	0	0	4	23	21	48	27	41	109	0	0	0	0	Scaffold_304	1945997	1952556	NA	IPR001584 Integrase, catalytic core;IPR043128 Reverse transcriptase/Diguanylate cyclase domain;IPR041577 Reverse transcriptase/retrotransposon-derived protein, RNase H-like domain;IPR026523 Paraneoplastic antigen Ma;IPR036397 Ribonuclease H superfamily;IPR041588 Integrase zinc-binding domain;IPR000477 Reverse transcriptase domain;IPR001969 Aspartic peptidase, active site;IPR012337 Ribonuclease H-…	go_process:GO:0015074 DNA integration;go_function:GO:0003676 nucleic acid binding;go_process:GO:0006508 proteolysis;go_function:GO:0004190 aspartic-type endopeptidase activity	NA	NA
10.March_g24763_mhcA	g24763	-8.66879208981276	-0.130604098522313	1.72662642338052e-07	9.30411832976631e-05	11	8	31	38	62	0	0	65	13	58	72	27	0	0	0	0	Scaffold_1110	4661467	4665378	mhcA	IPR014751 DNA repair protein XRCC4-like, C-terminal;IPR002928 Myosin tail	go_component:GO:0016459 myosin complex	MyHC-beta	in utero embryonic development;plasma membrane repair;regulation of the force of heart contraction;regulation of heart rate;extraocular skeletal muscle development;skeletal muscle contraction;muscle contraction;striated muscle contraction;border follicle cell migration;epithelial cell migration, open tracheal system;adult heart development;muscle organ development;visceral muscle development;adul…
11.March_g51266	g51266	-8.59842614738629	-0.197423593994884	7.13864666098128e-08	4.46718085730245e-05	1	3	1	1	68	8	1	63	30	51	17	60	0	0	0	0	Scaffold_2240	5549	11461	NA	IPR043128 Reverse transcriptase/Diguanylate cyclase domain;IPR040676 Domain of unknown function DUF5641;IPR008042 Retrotransposon, Pao;IPR005312 Protein of unknown function DUF1759;IPR000477 Reverse transcriptase domain;IPR036397 Ribonuclease H superfamily;IPR041588 Integrase zinc-binding domain;IPR001584 Integrase, catalytic core;IPR012337 Ribonuclease H-like superfamily;IPR043502 DNA/RNA polyme…	go_function:GO:0003676 nucleic acid binding;go_process:GO:0015074 DNA integration	NA	NA
12.March_g52133	g52133	-8.50951322456163	1.03104526912629	2.16478397986299e-10	2.47027320149189e-07	2	12	0	0	11	19	33	41	82	52	56	220	0	0	0	1	Scaffold_2269	75195	81380	NA	IPR041577 Reverse transcriptase/retrotransposon-derived protein, RNase H-like domain;IPR036397 Ribonuclease H superfamily;IPR000477 Reverse transcriptase domain;IPR026523 Paraneoplastic antigen Ma;IPR001584 Integrase, catalytic core;IPR043128 Reverse transcriptase/Diguanylate cyclase domain;IPR041588 Integrase zinc-binding domain;IPR001969 Aspartic peptidase, active site;IPR043502 DNA/RNA polymer…	go_function:GO:0003676 nucleic acid binding;go_process:GO:0015074 DNA integration;go_process:GO:0006508 proteolysis;go_function:GO:0004190 aspartic-type endopeptidase activity	NA	NA
13.March_g54202	g54202	-8.50038553835001	-0.28702834365188	3.06436719843419e-08	2.28637151086249e-05	0	2	0	0	0	4	14	15	28	30	25	71	0	0	0	0	Scaffold_2340	411527	416577	NA	IPR036397 Ribonuclease H superfamily;IPR041577 Reverse transcriptase/retrotransposon-derived protein, RNase H-like domain;IPR041588 Integrase zinc-binding domain;IPR001584 Integrase, catalytic core;IPR012337 Ribonuclease H-like superfamily;IPR043502 DNA/RNA polymerase superfamily	go_function:GO:0003676 nucleic acid binding;go_process:GO:0015074 DNA integration	NA	NA
14.March_g46799	g46799	-8.45609443463516	-0.328024734269062	5.18430476851393e-08	3.35234427348006e-05	0	0	6	0	0	58	0	83	33	18	32	66	0	0	0	0	Scaffold_2068	1	6701	NA	IPR000569 HECT domain;IPR035983 HECT, E3 ligase catalytic domain	go_function:GO:0004842 ubiquitin-protein transferase activity	NA	NA
15.March_g57686	g57686	-8.40839023258743	3.28138559464854	1.29158374942983e-15	5.01108663103785e-12	0	2	0	11	0	1	0	0	239	580	647	453	0	3	3	0	Scaffold_2455	1382139	1383356	NA	IPR029526 PiggyBac transposable element-derived protein	-	NA	NA
16.March_g33599	g33599	-8.22179170388681	0.791522395582471	2.46034169133357e-06	0.000852288722681785	0	1	0	0	1	2	0	2	53	3	131	176	0	0	1	0	Scaffold_1497	571157	572392	NA	IPR000477 Reverse transcriptase domain;IPR043502 DNA/RNA polymerase superfamily	-	NA	NA
17.March_g39064_ace1	g39064	-8.12199205255371	2.69226534771978	2.23109145972143e-07	0.000113897219018779	5	81	9	127	4	6	0	17	167	217	10	1002	0	0	3	4	Scaffold_1783	52866	54906	ace1	IPR029058 Alpha/Beta hydrolase fold;IPR002018 Carboxylesterase, type B;IPR033560 Bile salt-activated lipase;IPR019826 Carboxylesterase type B, active site;IPR019819 Carboxylesterase type B, conserved site	go_function:GO:0016788 hydrolase activity, acting on ester bonds;go_process:GO:0006629 lipid metabolic process	Acetylcholinesterase	acetylcholine catabolic process in synaptic cleft;retinoid metabolic process;regulation of receptor recycling;thigmotaxis;response to amphetamine;angiotensin maturation;osteoblast development;regulation of respiratory gaseous exchange by nervous system process;territorial aggressive behavior;brainstem development;acetylcholine catabolic process;protein targeting;acyl-CoA metabolic process;phospha…
18.March_g19844_snat2	g19844	-8.02861682479354	-0.721704646236427	1.78958154089664e-06	0.000655020609657621	0	7	0	0	23	26	0	16	39	13	30	18	0	0	0	0	Scaffold_831	385808	387864	snat2	IPR013057 Amino acid transporter, transmembrane domain	-	System N amino acid transporter 1	neurotransmitter uptake;amino acid transmembrane transport;sodium ion transport;amino acid transport;asparagine transport;glutamine transport;brain development;female pregnancy;positive regulation of gene expression;glutamate secretion;neutral amino acid transport;L-alanine transport;glycine transport;histidine transport;L-serine transport;cerebral cortex development;glycine betaine transport;ala…
19.March_g14360	g14360	-7.66492720254905	2.67836805046736	3.07487145696638e-16	1.49123578484227e-12	82	709	153	191	336	490	51	165	234	342	266	398	4	0	0	4	Scaffold_625	2344466	2348305	NA	IPR033214 A-kinase-interacting protein 1	go_process:GO:1901222 regulation of NIK/NF-kappaB signaling	NA	NA
20.March_g53140_G5984	g53140	-7.60133931306235	1.96226384569289	2.02791524930453e-14	5.6199325601798e-11	9	22	0	47	98	30	6	31	203	130	258	136	1	0	3	1	Scaffold_2309	81683	90820	G5984	IPR001878 Zinc finger, CCHC-type;IPR003309 SCAN domain;IPR043128 Reverse transcriptase/Diguanylate cyclase domain;IPR036397 Ribonuclease H superfamily;IPR041577 Reverse transcriptase/retrotransposon-derived protein, RNase H-like domain;IPR029044 Nucleotide-diphospho-sugar transferases;IPR038269 SCAN domain superfamily;IPR000477 Reverse transcriptase domain;IPR005076 Glycosyl transferase, family 6…	go_function:GO:0008270 zinc ion binding;go_function:GO:0003676 nucleic acid binding;go_process:GO:0005975 carbohydrate metabolic process;go_function:GO:0016758 transferase activity, transferring hexosyl groups;go_component:GO:0016020 membrane	Gag3-Pol3	carbohydrate metabolic process;DNA recombination;glycosphingolipid biosynthetic process;DNA integration;lipid glycosylation;transposition, RNA-mediated;protein galactosylation at cell surface;cellular response to manganese ion
