# Supplementary material
Source: Research Square preprint supplement (doi:10.21203/rs.3.rs-9115348/v1)
Supplement: Supplementary file 2 [file 191830588200eccfdf9d6232.xlsx]

## Sheet: Hoja 1 - combined_tissues
gene_id	tissue	Scaffold_ID	Start	End	sampleA	sampleB	logFC	InterPro_Annot	sma3s_name	sma3s_Annot	count	InterPro_GO_Terms	GO_term
g28324	gill	Scaffold_1286	779208	814795	Cabanes	Marchamalo	4.02019009980725	IPR002948 Thiazide-sensitive Na-K-Cl co-transporter;IPR013612 Amino acid permease, N-terminal;IPR004841 Amino acid permease/ SLC12A domain;IPR018491 SLC12A transporter, C-terminal	Bumetanide-sensitive sodium-(potassium)-chloride cotransporter 2	kidney development;ion transport;potassium ion transport;sodium ion transport;chloride transport;cellular sodium ion homeostasis;cell volume homeostasis;hyperosmotic response;gamma-aminobutyric acid signaling pathway;aging;excretion;T cell chemotaxis;ammonium transport;diterpenoid metabolic process;cellular potassium ion homeostasis;transepithelial chloride transport;cellular chloride ion homeost…	8	InterPro_GO_Terms_1; InterPro_GO_Terms_3	go_process:GO:0006811 ion transport; go_process:GO:0055085 transmembrane transport
g28324	gill	Scaffold_1286	779208	814795	Adra	Cabanes	-4.21473603905591	IPR002948 Thiazide-sensitive Na-K-Cl co-transporter;IPR013612 Amino acid permease, N-terminal;IPR004841 Amino acid permease/ SLC12A domain;IPR018491 SLC12A transporter, C-terminal	Bumetanide-sensitive sodium-(potassium)-chloride cotransporter 2	kidney development;ion transport;potassium ion transport;sodium ion transport;chloride transport;cellular sodium ion homeostasis;cell volume homeostasis;hyperosmotic response;gamma-aminobutyric acid signaling pathway;aging;excretion;T cell chemotaxis;ammonium transport;diterpenoid metabolic process;cellular potassium ion homeostasis;transepithelial chloride transport;cellular chloride ion homeost…	8	InterPro_GO_Terms_1; InterPro_GO_Terms_3	go_process:GO:0006811 ion transport; go_process:GO:0055085 transmembrane transport
g28324	gill	Scaffold_1286	779208	814795	Marchamalo	Santa_Pola	-5.23825099435059	IPR002948 Thiazide-sensitive Na-K-Cl co-transporter;IPR013612 Amino acid permease, N-terminal;IPR004841 Amino acid permease/ SLC12A domain;IPR018491 SLC12A transporter, C-terminal	Bumetanide-sensitive sodium-(potassium)-chloride cotransporter 2	kidney development;ion transport;potassium ion transport;sodium ion transport;chloride transport;cellular sodium ion homeostasis;cell volume homeostasis;hyperosmotic response;gamma-aminobutyric acid signaling pathway;aging;excretion;T cell chemotaxis;ammonium transport;diterpenoid metabolic process;cellular potassium ion homeostasis;transepithelial chloride transport;cellular chloride ion homeost…	8	InterPro_GO_Terms_1; InterPro_GO_Terms_3	go_process:GO:0006811 ion transport; go_process:GO:0055085 transmembrane transport
g28324	gill	Scaffold_1286	779208	814795	Adra	Santa_Pola	-5.4164529332724	IPR002948 Thiazide-sensitive Na-K-Cl co-transporter;IPR013612 Amino acid permease, N-terminal;IPR004841 Amino acid permease/ SLC12A domain;IPR018491 SLC12A transporter, C-terminal	Bumetanide-sensitive sodium-(potassium)-chloride cotransporter 2	kidney development;ion transport;potassium ion transport;sodium ion transport;chloride transport;cellular sodium ion homeostasis;cell volume homeostasis;hyperosmotic response;gamma-aminobutyric acid signaling pathway;aging;excretion;T cell chemotaxis;ammonium transport;diterpenoid metabolic process;cellular potassium ion homeostasis;transepithelial chloride transport;cellular chloride ion homeost…	8	InterPro_GO_Terms_1; InterPro_GO_Terms_3	go_process:GO:0006811 ion transport; go_process:GO:0055085 transmembrane transport
g47913	stomach	Scaffold_2105	1033374	1055231	Cabanes	Marchamalo	8.75879484481923	IPR002948 Thiazide-sensitive Na-K-Cl co-transporter;IPR018491 SLC12A transporter, C-terminal;IPR004841 Amino acid permease/ SLC12A domain;IPR004842 SLC12A transporter family	Bumetanide-sensitive sodium-(potassium)-chloride cotransporter 2	kidney development;ion transport;potassium ion transport;sodium ion transport;chloride transport;cellular sodium ion homeostasis;cell volume homeostasis;hyperosmotic response;gamma-aminobutyric acid signaling pathway;aging;excretion;T cell chemotaxis;ammonium transport;diterpenoid metabolic process;cellular potassium ion homeostasis;transepithelial chloride transport;cellular chloride ion homeost…	7	InterPro_GO_Terms_1; InterPro_GO_Terms_4	go_process:GO:0006811 ion transport; go_process:GO:0055085 transmembrane transport
g47913	gill	Scaffold_2105	1033374	1055231	Cabanes	Marchamalo	6.59328420014637	IPR002948 Thiazide-sensitive Na-K-Cl co-transporter;IPR018491 SLC12A transporter, C-terminal;IPR004841 Amino acid permease/ SLC12A domain;IPR004842 SLC12A transporter family	Bumetanide-sensitive sodium-(potassium)-chloride cotransporter 2	kidney development;ion transport;potassium ion transport;sodium ion transport;chloride transport;cellular sodium ion homeostasis;cell volume homeostasis;hyperosmotic response;gamma-aminobutyric acid signaling pathway;aging;excretion;T cell chemotaxis;ammonium transport;diterpenoid metabolic process;cellular potassium ion homeostasis;transepithelial chloride transport;cellular chloride ion homeost…	7	InterPro_GO_Terms_1; InterPro_GO_Terms_4	go_process:GO:0006811 ion transport; go_process:GO:0055085 transmembrane transport
g47913	gill	Scaffold_2105	1033374	1055231	Adra	Marchamalo	5.15209415528002	IPR002948 Thiazide-sensitive Na-K-Cl co-transporter;IPR018491 SLC12A transporter, C-terminal;IPR004841 Amino acid permease/ SLC12A domain;IPR004842 SLC12A transporter family	Bumetanide-sensitive sodium-(potassium)-chloride cotransporter 2	kidney development;ion transport;potassium ion transport;sodium ion transport;chloride transport;cellular sodium ion homeostasis;cell volume homeostasis;hyperosmotic response;gamma-aminobutyric acid signaling pathway;aging;excretion;T cell chemotaxis;ammonium transport;diterpenoid metabolic process;cellular potassium ion homeostasis;transepithelial chloride transport;cellular chloride ion homeost…	7	InterPro_GO_Terms_4	go_process:GO:0055085 transmembrane transport
g47913	gill	Scaffold_2105	1033374	1055231	Marchamalo	Santa_Pola	-5.48287949599117	IPR002948 Thiazide-sensitive Na-K-Cl co-transporter;IPR018491 SLC12A transporter, C-terminal;IPR004841 Amino acid permease/ SLC12A domain;IPR004842 SLC12A transporter family	Bumetanide-sensitive sodium-(potassium)-chloride cotransporter 2	kidney development;ion transport;potassium ion transport;sodium ion transport;chloride transport;cellular sodium ion homeostasis;cell volume homeostasis;hyperosmotic response;gamma-aminobutyric acid signaling pathway;aging;excretion;T cell chemotaxis;ammonium transport;diterpenoid metabolic process;cellular potassium ion homeostasis;transepithelial chloride transport;cellular chloride ion homeost…	7	InterPro_GO_Terms_1; InterPro_GO_Terms_4	go_process:GO:0006811 ion transport; go_process:GO:0055085 transmembrane transport
g15033	stomach	Scaffold_640	1712488	1749957	Cabanes	Marchamalo	8.40199907159159	IPR000076 K/Cl co-transporter;IPR004841 Amino acid permease/ SLC12A domain;IPR004842 SLC12A transporter family;IPR018491 SLC12A transporter, C-terminal;IPR030358 K/Cl co-transporter 2	Solute carrier family 12 member 5	ammonium transport;chloride transmembrane transport;angiogenesis;ammonium import across plasma membrane;potassium ion homeostasis;thermosensory behavior;hypotonic response;intracellular pH reduction;potassium ion import across plasma membrane;chloride ion homeostasis;cellular hypotonic response;cellular chloride ion homeostasis;potassium ion transport;response to drug;cellular ion homeostasis;den…	6	InterPro_GO_Terms_2; InterPro_GO_Terms_4	go_process:GO:0006811 ion transport; go_process:GO:0055085 transmembrane transport
g15033	gill	Scaffold_640	1712488	1749957	Cabanes	Marchamalo	4.98419486097917	IPR000076 K/Cl co-transporter;IPR004841 Amino acid permease/ SLC12A domain;IPR004842 SLC12A transporter family;IPR018491 SLC12A transporter, C-terminal;IPR030358 K/Cl co-transporter 2	Solute carrier family 12 member 5	ammonium transport;chloride transmembrane transport;angiogenesis;ammonium import across plasma membrane;potassium ion homeostasis;thermosensory behavior;hypotonic response;intracellular pH reduction;potassium ion import across plasma membrane;chloride ion homeostasis;cellular hypotonic response;cellular chloride ion homeostasis;potassium ion transport;response to drug;cellular ion homeostasis;den…	6	InterPro_GO_Terms_2; InterPro_GO_Terms_4	go_process:GO:0006811 ion transport; go_process:GO:0055085 transmembrane transport
g15033	gill	Scaffold_640	1712488	1749957	Adra	Cabanes	-2.56954361345406	IPR000076 K/Cl co-transporter;IPR004841 Amino acid permease/ SLC12A domain;IPR004842 SLC12A transporter family;IPR018491 SLC12A transporter, C-terminal;IPR030358 K/Cl co-transporter 2	Solute carrier family 12 member 5	ammonium transport;chloride transmembrane transport;angiogenesis;ammonium import across plasma membrane;potassium ion homeostasis;thermosensory behavior;hypotonic response;intracellular pH reduction;potassium ion import across plasma membrane;chloride ion homeostasis;cellular hypotonic response;cellular chloride ion homeostasis;potassium ion transport;response to drug;cellular ion homeostasis;den…	6	InterPro_GO_Terms_2; InterPro_GO_Terms_4	go_process:GO:0006811 ion transport; go_process:GO:0055085 transmembrane transport
g61913	gill	Scaffold_2604	794052	826241	Adra	Marchamalo	3.51902638185561	IPR001807 Chloride channel, voltage gated;IPR014743 Chloride channel, core	Chloride channel protein 2	kidney development;renal water homeostasis;renal water transport;chloride transport;muscle contraction;excretion;body fluid secretion;response to pH;response to water deprivation;neuronal action potential propagation;transepithelial chloride transport;lung development;regulation of aldosterone biosynthetic process;ion transmembrane transport;regulation of ion transmembrane transport;transepitheli…	6	InterPro_GO_Terms_1; InterPro_GO_Terms_2	go_process:GO:0006821 chloride transport; go_process:GO:0055085 transmembrane transport
g61913	gill	Scaffold_2604	794052	826241	Adra	Santa_Pola	2.37824123692249	IPR001807 Chloride channel, voltage gated;IPR014743 Chloride channel, core	Chloride channel protein 2	kidney development;renal water homeostasis;renal water transport;chloride transport;muscle contraction;excretion;body fluid secretion;response to pH;response to water deprivation;neuronal action potential propagation;transepithelial chloride transport;lung development;regulation of aldosterone biosynthetic process;ion transmembrane transport;regulation of ion transmembrane transport;transepitheli…	6	InterPro_GO_Terms_1; InterPro_GO_Terms_2	go_process:GO:0006821 chloride transport; go_process:GO:0055085 transmembrane transport
g61913	gill	Scaffold_2604	794052	826241	Adra	Cabanes	2.06105230746966	IPR001807 Chloride channel, voltage gated;IPR014743 Chloride channel, core	Chloride channel protein 2	kidney development;renal water homeostasis;renal water transport;chloride transport;muscle contraction;excretion;body fluid secretion;response to pH;response to water deprivation;neuronal action potential propagation;transepithelial chloride transport;lung development;regulation of aldosterone biosynthetic process;ion transmembrane transport;regulation of ion transmembrane transport;transepitheli…	6	InterPro_GO_Terms_1; InterPro_GO_Terms_2	go_process:GO:0006821 chloride transport; go_process:GO:0055085 transmembrane transport
g61916	gill	Scaffold_2604	847828	904431	Adra	Marchamalo	3.37035203742337	IPR001807 Chloride channel, voltage gated;IPR014743 Chloride channel, core	Chloride channel protein 2	kidney development;renal water homeostasis;renal water transport;chloride transport;muscle contraction;excretion;body fluid secretion;response to pH;response to water deprivation;neuronal action potential propagation;transepithelial chloride transport;lung development;regulation of aldosterone biosynthetic process;ion transmembrane transport;regulation of ion transmembrane transport;transepitheli…	6	InterPro_GO_Terms_1; InterPro_GO_Terms_2	go_process:GO:0006821 chloride transport; go_process:GO:0055085 transmembrane transport
g61916	gill	Scaffold_2604	847828	904431	Adra	Santa_Pola	2.08102111228517	IPR001807 Chloride channel, voltage gated;IPR014743 Chloride channel, core	Chloride channel protein 2	kidney development;renal water homeostasis;renal water transport;chloride transport;muscle contraction;excretion;body fluid secretion;response to pH;response to water deprivation;neuronal action potential propagation;transepithelial chloride transport;lung development;regulation of aldosterone biosynthetic process;ion transmembrane transport;regulation of ion transmembrane transport;transepitheli…	6	InterPro_GO_Terms_1; InterPro_GO_Terms_2	go_process:GO:0006821 chloride transport; go_process:GO:0055085 transmembrane transport
g61916	gill	Scaffold_2604	847828	904431	Adra	Cabanes	2.01761127017841	IPR001807 Chloride channel, voltage gated;IPR014743 Chloride channel, core	Chloride channel protein 2	kidney development;renal water homeostasis;renal water transport;chloride transport;muscle contraction;excretion;body fluid secretion;response to pH;response to water deprivation;neuronal action potential propagation;transepithelial chloride transport;lung development;regulation of aldosterone biosynthetic process;ion transmembrane transport;regulation of ion transmembrane transport;transepitheli…	6	InterPro_GO_Terms_1; InterPro_GO_Terms_2	go_process:GO:0006821 chloride transport; go_process:GO:0055085 transmembrane transport
g68311	gill	Scaffold_2827	775242	792997	Adra	Marchamalo	-2.8162003894805	IPR004709 Na+/H+ exchanger;IPR006153 Cation/H+ exchanger;IPR032103 Sodium/hydrogen exchanger, regulatory region;IPR018422 Cation/H+ exchanger, CPA1 family	Solute carrier family 9 member 1	gastric acid secretion;regulation of the force of heart contraction;epithelial cell development;ion transport;sodium ion transport;cellular sodium ion homeostasis;regulation of pH;protein localization;response to salt stress;response to acidic pH;positive regulation of cardiac muscle hypertrophy;regulation of cardiac muscle contraction by calcium ion signaling;response to organic cyclic compound;…	6	InterPro_GO_Terms_3; InterPro_GO_Terms_4; InterPro_GO_Terms_7	go_process:GO:0055085 transmembrane transport; go_process:GO:0006814 sodium ion transport; go_process:GO:0006812 cation transport
g68311	gill	Scaffold_2827	775242	792997	Cabanes	Marchamalo	-2.92243579735077	IPR004709 Na+/H+ exchanger;IPR006153 Cation/H+ exchanger;IPR032103 Sodium/hydrogen exchanger, regulatory region;IPR018422 Cation/H+ exchanger, CPA1 family	Solute carrier family 9 member 1	gastric acid secretion;regulation of the force of heart contraction;epithelial cell development;ion transport;sodium ion transport;cellular sodium ion homeostasis;regulation of pH;protein localization;response to salt stress;response to acidic pH;positive regulation of cardiac muscle hypertrophy;regulation of cardiac muscle contraction by calcium ion signaling;response to organic cyclic compound;…	6	InterPro_GO_Terms_3; InterPro_GO_Terms_4; InterPro_GO_Terms_7	go_process:GO:0055085 transmembrane transport; go_process:GO:0006814 sodium ion transport; go_process:GO:0006812 cation transport
g10790	gill	Scaffold_463	240388	274130	Marchamalo	Santa_Pola	2.31851907185796	IPR002443 Solute carrier family 12 member 1/2;IPR004841 Amino acid permease/ SLC12A domain;IPR008906 HAT, C-terminal dimerisation domain;IPR018491 SLC12A transporter, C-terminal;IPR002444 Solute carrier family 12 member 2;IPR012337 Ribonuclease H-like superfamily	Bumetanide-sensitive sodium-(potassium)-chloride cotransporter 2	kidney development;ion transport;potassium ion transport;sodium ion transport;chloride transport;cellular sodium ion homeostasis;cell volume homeostasis;hyperosmotic response;gamma-aminobutyric acid signaling pathway;aging;excretion;T cell chemotaxis;ammonium transport;diterpenoid metabolic process;cellular potassium ion homeostasis;transepithelial chloride transport;cellular chloride ion homeost…	4	InterPro_GO_Terms_1; InterPro_GO_Terms_4	go_process:GO:0006811 ion transport; go_process:GO:0055085 transmembrane transport
g10790	gill	Scaffold_463	240388	274130	Cabanes	Marchamalo	-2.52256699908843	IPR002443 Solute carrier family 12 member 1/2;IPR004841 Amino acid permease/ SLC12A domain;IPR008906 HAT, C-terminal dimerisation domain;IPR018491 SLC12A transporter, C-terminal;IPR002444 Solute carrier family 12 member 2;IPR012337 Ribonuclease H-like superfamily	Bumetanide-sensitive sodium-(potassium)-chloride cotransporter 2	kidney development;ion transport;potassium ion transport;sodium ion transport;chloride transport;cellular sodium ion homeostasis;cell volume homeostasis;hyperosmotic response;gamma-aminobutyric acid signaling pathway;aging;excretion;T cell chemotaxis;ammonium transport;diterpenoid metabolic process;cellular potassium ion homeostasis;transepithelial chloride transport;cellular chloride ion homeost…	4	InterPro_GO_Terms_1; InterPro_GO_Terms_4	go_process:GO:0006811 ion transport; go_process:GO:0055085 transmembrane transport
g25695	gill	Scaffold_1133	3106392	3125324	Adra	Santa_Pola	8.52298003631313	IPR004014 Cation-transporting P-type ATPase, N-terminal;IPR023214 HAD superfamily;IPR023299 P-type ATPase, cytoplasmic domain N;IPR005775 P-type ATPase subfamily IIC, subunit alpha;IPR006068 Cation-transporting P-type ATPase, C-terminal;IPR001757 P-type ATPase;IPR044492 P-type ATPase, haloacid dehalogenase domain;IPR018303 P-type ATPase, phosphorylation site;IPR023298 P-type ATPase, transmembrane…	Na(+)/K(+) ATPase alpha-1 subunit	neurotransmitter uptake;behavioral fear response;gastric acid secretion;tissue homeostasis;regulation of the force of heart contraction;regulation of sodium ion transport;regulation of respiratory gaseous exchange by nervous system process;cation transport;potassium ion transport;sodium ion transport;cellular sodium ion homeostasis;regulation of pH;regulation of muscle contraction;regulation of s…	4	InterPro_GO_Terms_3	go_process:GO:0006813 potassium ion transport
g25695	gill	Scaffold_1133	3106392	3125324	Adra	Cabanes	6.93512095371521	IPR004014 Cation-transporting P-type ATPase, N-terminal;IPR023214 HAD superfamily;IPR023299 P-type ATPase, cytoplasmic domain N;IPR005775 P-type ATPase subfamily IIC, subunit alpha;IPR006068 Cation-transporting P-type ATPase, C-terminal;IPR001757 P-type ATPase;IPR044492 P-type ATPase, haloacid dehalogenase domain;IPR018303 P-type ATPase, phosphorylation site;IPR023298 P-type ATPase, transmembrane…	Na(+)/K(+) ATPase alpha-1 subunit	neurotransmitter uptake;behavioral fear response;gastric acid secretion;tissue homeostasis;regulation of the force of heart contraction;regulation of sodium ion transport;regulation of respiratory gaseous exchange by nervous system process;cation transport;potassium ion transport;sodium ion transport;cellular sodium ion homeostasis;regulation of pH;regulation of muscle contraction;regulation of s…	4	InterPro_GO_Terms_3	go_process:GO:0006813 potassium ion transport
g25695	gill	Scaffold_1133	3106392	3125324	Adra	Marchamalo	4.28477555936346	IPR004014 Cation-transporting P-type ATPase, N-terminal;IPR023214 HAD superfamily;IPR023299 P-type ATPase, cytoplasmic domain N;IPR005775 P-type ATPase subfamily IIC, subunit alpha;IPR006068 Cation-transporting P-type ATPase, C-terminal;IPR001757 P-type ATPase;IPR044492 P-type ATPase, haloacid dehalogenase domain;IPR018303 P-type ATPase, phosphorylation site;IPR023298 P-type ATPase, transmembrane…	Na(+)/K(+) ATPase alpha-1 subunit	neurotransmitter uptake;behavioral fear response;gastric acid secretion;tissue homeostasis;regulation of the force of heart contraction;regulation of sodium ion transport;regulation of respiratory gaseous exchange by nervous system process;cation transport;potassium ion transport;sodium ion transport;cellular sodium ion homeostasis;regulation of pH;regulation of muscle contraction;regulation of s…	4	InterPro_GO_Terms_3	go_process:GO:0006813 potassium ion transport
g25695	gill	Scaffold_1133	3106392	3125324	Marchamalo	Santa_Pola	4.24152111536748	IPR004014 Cation-transporting P-type ATPase, N-terminal;IPR023214 HAD superfamily;IPR023299 P-type ATPase, cytoplasmic domain N;IPR005775 P-type ATPase subfamily IIC, subunit alpha;IPR006068 Cation-transporting P-type ATPase, C-terminal;IPR001757 P-type ATPase;IPR044492 P-type ATPase, haloacid dehalogenase domain;IPR018303 P-type ATPase, phosphorylation site;IPR023298 P-type ATPase, transmembrane…	Na(+)/K(+) ATPase alpha-1 subunit	neurotransmitter uptake;behavioral fear response;gastric acid secretion;tissue homeostasis;regulation of the force of heart contraction;regulation of sodium ion transport;regulation of respiratory gaseous exchange by nervous system process;cation transport;potassium ion transport;sodium ion transport;cellular sodium ion homeostasis;regulation of pH;regulation of muscle contraction;regulation of s…	4	InterPro_GO_Terms_3	go_process:GO:0006813 potassium ion transport
g52506	gill	Scaffold_2287	769112	792794	Marchamalo	Santa_Pola	2.37981204288418	IPR005821 Ion transport domain;IPR027359 Voltage-dependent channel domain superfamily;IPR043203 Voltage-gated cation channel calcium and sodium	Sodium channel protein type 10 subunit alpha	action potential;regulation of heart rate;cardiac ventricle development;brainstem development;sodium ion transport;inflammatory response;nervous system development;peripheral nervous system development;muscle organ development;sensory perception;sensory perception of sound;sensory perception of smell;memory;locomotory behavior;adult walking behavior;mechanosensory behavior;adult locomotory behavi…	4	InterPro_GO_Terms_2; InterPro_GO_Terms_4	go_process:GO:0055085 transmembrane transport; go_process:GO:0006811 ion transport
g52506	gill	Scaffold_2287	769112	792794	Cabanes	Marchamalo	-2.11844418550916	IPR005821 Ion transport domain;IPR027359 Voltage-dependent channel domain superfamily;IPR043203 Voltage-gated cation channel calcium and sodium	Sodium channel protein type 10 subunit alpha	action potential;regulation of heart rate;cardiac ventricle development;brainstem development;sodium ion transport;inflammatory response;nervous system development;peripheral nervous system development;muscle organ development;sensory perception;sensory perception of sound;sensory perception of smell;memory;locomotory behavior;adult walking behavior;mechanosensory behavior;adult locomotory behavi…	4	InterPro_GO_Terms_2; InterPro_GO_Terms_4	go_process:GO:0055085 transmembrane transport; go_process:GO:0006811 ion transport
g52507	gill	Scaffold_2287	795667	805216	Marchamalo	Santa_Pola	2.41904736828699	IPR027359 Voltage-dependent channel domain superfamily;IPR005821 Ion transport domain;IPR043203 Voltage-gated cation channel calcium and sodium	Sodium channel protein type 4 subunit alpha B	regulation of ion transmembrane transport	4	InterPro_GO_Terms_2; InterPro_GO_Terms_4	go_process:GO:0055085 transmembrane transport; go_process:GO:0006811 ion transport
g52507	gill	Scaffold_2287	795667	805216	Cabanes	Marchamalo	-3.1678111959625	IPR027359 Voltage-dependent channel domain superfamily;IPR005821 Ion transport domain;IPR043203 Voltage-gated cation channel calcium and sodium	Sodium channel protein type 4 subunit alpha B	regulation of ion transmembrane transport	4	InterPro_GO_Terms_2; InterPro_GO_Terms_4	go_process:GO:0055085 transmembrane transport; go_process:GO:0006811 ion transport
g54262	gill	Scaffold_2340	1456621	1486529	Cabanes	Marchamalo	-8.63596531646242	IPR006201 Neurotransmitter-gated ion-channel;IPR036734 Neurotransmitter-gated ion-channel ligand-binding domain superfamily;IPR006029 Neurotransmitter-gated ion-channel transmembrane domain;IPR006202 Neurotransmitter-gated ion-channel ligand-binding domain;IPR018000 Neurotransmitter-gated ion-channel, conserved site;IPR036719 Neurotransmitter-gated ion-channel transmembrane domain superfamily	NA	NA	4	InterPro_GO_Terms_4; InterPro_GO_Terms_6	go_process:GO:0034220 ion transmembrane transport; go_process:GO:0006811 ion transport
g54262	gill	Scaffold_2340	1456621	1486529	Cabanes	Santa_Pola	-10.1127405805581	IPR006201 Neurotransmitter-gated ion-channel;IPR036734 Neurotransmitter-gated ion-channel ligand-binding domain superfamily;IPR006029 Neurotransmitter-gated ion-channel transmembrane domain;IPR006202 Neurotransmitter-gated ion-channel ligand-binding domain;IPR018000 Neurotransmitter-gated ion-channel, conserved site;IPR036719 Neurotransmitter-gated ion-channel transmembrane domain superfamily	NA	NA	4	InterPro_GO_Terms_4; InterPro_GO_Terms_6	go_process:GO:0034220 ion transmembrane transport; go_process:GO:0006811 ion transport
g56865	gill	Scaffold_2425	1634444	1637645	Adra	Santa_Pola	2.80042627994247	IPR004709 Na+/H+ exchanger;IPR006153 Cation/H+ exchanger;IPR018422 Cation/H+ exchanger, CPA1 family	Sodium/hydrogen exchanger 3	regulation of sodium ion transport;ion transport;sodium ion transport;regulation of pH;receptor-mediated endocytosis;circadian rhythm;response to glucocorticoid;regulation of intracellular pH;potassium ion transmembrane transport;sodium ion import across plasma membrane;proton transmembrane transport	4	InterPro_GO_Terms_3; InterPro_GO_Terms_7	go_process:GO:0055085 transmembrane transport; go_process:GO:0006812 cation transport
g56865	gill	Scaffold_2425	1634444	1637645	Adra	Marchamalo	2.14737366203176	IPR004709 Na+/H+ exchanger;IPR006153 Cation/H+ exchanger;IPR018422 Cation/H+ exchanger, CPA1 family	Sodium/hydrogen exchanger 3	regulation of sodium ion transport;ion transport;sodium ion transport;regulation of pH;receptor-mediated endocytosis;circadian rhythm;response to glucocorticoid;regulation of intracellular pH;potassium ion transmembrane transport;sodium ion import across plasma membrane;proton transmembrane transport	4	InterPro_GO_Terms_3; InterPro_GO_Terms_7	go_process:GO:0055085 transmembrane transport; go_process:GO:0006812 cation transport
g68737	gill	Scaffold_2841	1546332	1612580	Marchamalo	Santa_Pola	2.57171275395941	IPR009147 Cystic fibrosis transmembrane conductance regulator;IPR003593 AAA+ ATPase domain;IPR025837 CFTR regulator domain;IPR003439 ABC transporter-like;IPR036640 ABC transporter type 1, transmembrane domain superfamily;IPR011527 ABC transporter type 1, transmembrane domain;IPR017871 ABC transporter, conserved site;IPR027417 P-loop containing nucleoside triphosphate hydrolase	ATP-binding cassette sub-family C member 7	respiratory burst involved in defense response;cholesterol biosynthetic process;chloride transport;water transport;vesicle docking involved in exocytosis;germ cell migration;bicarbonate transport;iodide transport;cholesterol transport;transepithelial chloride transport;lung development;pancreas development;cellular response to hormone stimulus;positive regulation of mast cell activation;response …	4	InterPro_GO_Terms_1; InterPro_GO_Terms_7	go_process:GO:0006811 ion transport; go_process:GO:0055085 transmembrane transport
g68737	gill	Scaffold_2841	1546332	1612580	Cabanes	Marchamalo	-2.59950681212797	IPR009147 Cystic fibrosis transmembrane conductance regulator;IPR003593 AAA+ ATPase domain;IPR025837 CFTR regulator domain;IPR003439 ABC transporter-like;IPR036640 ABC transporter type 1, transmembrane domain superfamily;IPR011527 ABC transporter type 1, transmembrane domain;IPR017871 ABC transporter, conserved site;IPR027417 P-loop containing nucleoside triphosphate hydrolase	ATP-binding cassette sub-family C member 7	respiratory burst involved in defense response;cholesterol biosynthetic process;chloride transport;water transport;vesicle docking involved in exocytosis;germ cell migration;bicarbonate transport;iodide transport;cholesterol transport;transepithelial chloride transport;lung development;pancreas development;cellular response to hormone stimulus;positive regulation of mast cell activation;response …	4	InterPro_GO_Terms_1; InterPro_GO_Terms_7	go_process:GO:0006811 ion transport; go_process:GO:0055085 transmembrane transport
g9201	gill	Scaffold_385	1488798	1514838	Adra	Cabanes	-6.76492321875859	IPR004841 Amino acid permease/ SLC12A domain;IPR018491 SLC12A transporter, C-terminal	Solute carrier family 12 member 9	ion transport;cell volume homeostasis;chloride ion homeostasis;potassium ion homeostasis;chloride transmembrane transport;potassium ion import across plasma membrane	4	InterPro_GO_Terms_1; InterPro_GO_Terms_3	go_process:GO:0055085 transmembrane transport; go_process:GO:0006811 ion transport
g9201	gill	Scaffold_385	1488798	1514838	Adra	Santa_Pola	-9.57155916839535	IPR004841 Amino acid permease/ SLC12A domain;IPR018491 SLC12A transporter, C-terminal	Solute carrier family 12 member 9	ion transport;cell volume homeostasis;chloride ion homeostasis;potassium ion homeostasis;chloride transmembrane transport;potassium ion import across plasma membrane	4	InterPro_GO_Terms_1; InterPro_GO_Terms_3	go_process:GO:0055085 transmembrane transport; go_process:GO:0006811 ion transport
g23173	gill	Scaffold_1030	36695	51130	Adra	Santa_Pola	9.39888973702536	IPR004841 Amino acid permease/ SLC12A domain;IPR013612 Amino acid permease, N-terminal	Bumetanide-sensitive sodium-(potassium)-chloride cotransporter 2	kidney development;ion transport;potassium ion transport;sodium ion transport;chloride transport;cellular sodium ion homeostasis;cell volume homeostasis;hyperosmotic response;gamma-aminobutyric acid signaling pathway;aging;excretion;T cell chemotaxis;ammonium transport;diterpenoid metabolic process;cellular potassium ion homeostasis;transepithelial chloride transport;cellular chloride ion homeost…	3	InterPro_GO_Terms_1	go_process:GO:0055085 transmembrane transport
g23173	gill	Scaffold_1030	36695	51130	Adra	Cabanes	8.16733483683669	IPR004841 Amino acid permease/ SLC12A domain;IPR013612 Amino acid permease, N-terminal	Bumetanide-sensitive sodium-(potassium)-chloride cotransporter 2	kidney development;ion transport;potassium ion transport;sodium ion transport;chloride transport;cellular sodium ion homeostasis;cell volume homeostasis;hyperosmotic response;gamma-aminobutyric acid signaling pathway;aging;excretion;T cell chemotaxis;ammonium transport;diterpenoid metabolic process;cellular potassium ion homeostasis;transepithelial chloride transport;cellular chloride ion homeost…	3	InterPro_GO_Terms_1	go_process:GO:0055085 transmembrane transport
g23173	gill	Scaffold_1030	36695	51130	Adra	Marchamalo	8.03126522400957	IPR004841 Amino acid permease/ SLC12A domain;IPR013612 Amino acid permease, N-terminal	Bumetanide-sensitive sodium-(potassium)-chloride cotransporter 2	kidney development;ion transport;potassium ion transport;sodium ion transport;chloride transport;cellular sodium ion homeostasis;cell volume homeostasis;hyperosmotic response;gamma-aminobutyric acid signaling pathway;aging;excretion;T cell chemotaxis;ammonium transport;diterpenoid metabolic process;cellular potassium ion homeostasis;transepithelial chloride transport;cellular chloride ion homeost…	3	InterPro_GO_Terms_1	go_process:GO:0055085 transmembrane transport
g46715	gill	Scaffold_2066	243266	265405	Adra	Marchamalo	4.27452566119829	IPR006201 Neurotransmitter-gated ion-channel;IPR006028 Gamma-aminobutyric acid A receptor/Glycine receptor alpha;IPR006029 Neurotransmitter-gated ion-channel transmembrane domain;IPR036734 Neurotransmitter-gated ion-channel ligand-binding domain superfamily;IPR006202 Neurotransmitter-gated ion-channel ligand-binding domain;IPR018000 Neurotransmitter-gated ion-channel, conserved site;IPR036719 Neu…	GABA(C) receptor	regulation of neurotransmitter levels;inter-male aggressive behavior;ion transport;chloride transport;neurotransmitter transport;signal transduction;gamma-aminobutyric acid signaling pathway;chemical synaptic transmission;visual perception;sensory perception of sound;learning;memory;response to mechanical stimulus;reproductive behavior;cerebellum development;sleep;ion transmembrane transport;soci…	3	InterPro_GO_Terms_4	go_process:GO:0034220 ion transmembrane transport
g46715	gill	Scaffold_2066	243266	265405	Cabanes	Marchamalo	3.62260403962914	IPR006201 Neurotransmitter-gated ion-channel;IPR006028 Gamma-aminobutyric acid A receptor/Glycine receptor alpha;IPR006029 Neurotransmitter-gated ion-channel transmembrane domain;IPR036734 Neurotransmitter-gated ion-channel ligand-binding domain superfamily;IPR006202 Neurotransmitter-gated ion-channel ligand-binding domain;IPR018000 Neurotransmitter-gated ion-channel, conserved site;IPR036719 Neu…	GABA(C) receptor	regulation of neurotransmitter levels;inter-male aggressive behavior;ion transport;chloride transport;neurotransmitter transport;signal transduction;gamma-aminobutyric acid signaling pathway;chemical synaptic transmission;visual perception;sensory perception of sound;learning;memory;response to mechanical stimulus;reproductive behavior;cerebellum development;sleep;ion transmembrane transport;soci…	3	InterPro_GO_Terms_4; InterPro_GO_Terms_5	go_process:GO:0034220 ion transmembrane transport; go_process:GO:0006811 ion transport
g51916	gill	Scaffold_2261	497663	509739	Adra	Marchamalo	2.45955057425926	IPR005821 Ion transport domain;IPR029581 Transient receptor potential cation channel subfamily M member 4	Calcium-activated non-selective cation channel 1	temperature homeostasis;adaptive immune response;dendritic cell chemotaxis;regulation of T cell cytokine production;calcium ion transport;manganese ion transport;positive regulation of cytosolic calcium ion concentration;positive regulation of cell population proliferation;response to heat;positive regulation of heart rate;response to purine-containing compound;protein sumoylation;calcium-mediate…	3	InterPro_GO_Terms_2; InterPro_GO_Terms_6; InterPro_GO_Terms_7	go_process:GO:0055085 transmembrane transport; go_process:GO:0034220 ion transmembrane transport; go_process:GO:0006812 cation transport
g59246	gill	Scaffold_2521	200978	218099	Adra	Cabanes	3.66526693748807	IPR001717 Anion exchange protein;IPR003020 Bicarbonate transporter, eukaryotic;IPR011531 Bicarbonate transporter, C-terminal;IPR016152 Phosphotransferase/anion transporter;IPR013769 Band 3 cytoplasmic domain;IPR018241 Anion exchange, conserved site	AE 2	anion transport;chloride transport;cellular ion homeostasis;spermatogenesis;blood coagulation;circadian rhythm;response to water deprivation;response to carbon dioxide;response to alkaline pH;response to acidic pH;response to activity;bicarbonate transport;plasma membrane phospholipid scrambling;response to nutrient levels;negative regulation of urine volume;positive regulation of T cell prolifer…	3	InterPro_GO_Terms_1	go_process:GO:0006820 anion transport
g59246	gill	Scaffold_2521	200978	218099	Adra	Santa_Pola	3.42692098505679	IPR001717 Anion exchange protein;IPR003020 Bicarbonate transporter, eukaryotic;IPR011531 Bicarbonate transporter, C-terminal;IPR016152 Phosphotransferase/anion transporter;IPR013769 Band 3 cytoplasmic domain;IPR018241 Anion exchange, conserved site	AE 2	anion transport;chloride transport;cellular ion homeostasis;spermatogenesis;blood coagulation;circadian rhythm;response to water deprivation;response to carbon dioxide;response to alkaline pH;response to acidic pH;response to activity;bicarbonate transport;plasma membrane phospholipid scrambling;response to nutrient levels;negative regulation of urine volume;positive regulation of T cell prolifer…	3	InterPro_GO_Terms_1	go_process:GO:0006820 anion transport
g59246	gill	Scaffold_2521	200978	218099	Adra	Marchamalo	3.2589939231868	IPR001717 Anion exchange protein;IPR003020 Bicarbonate transporter, eukaryotic;IPR011531 Bicarbonate transporter, C-terminal;IPR016152 Phosphotransferase/anion transporter;IPR013769 Band 3 cytoplasmic domain;IPR018241 Anion exchange, conserved site	AE 2	anion transport;chloride transport;cellular ion homeostasis;spermatogenesis;blood coagulation;circadian rhythm;response to water deprivation;response to carbon dioxide;response to alkaline pH;response to acidic pH;response to activity;bicarbonate transport;plasma membrane phospholipid scrambling;response to nutrient levels;negative regulation of urine volume;positive regulation of T cell prolifer…	3	InterPro_GO_Terms_1	go_process:GO:0006820 anion transport
g60147	gill	Scaffold_2541	2931	23036	Adra	Santa_Pola	12.2913872641734	IPR004841 Amino acid permease/ SLC12A domain;IPR018491 SLC12A transporter, C-terminal	Na-Cl symporter	ion transport;potassium ion transport;sodium ion transport;chloride transport;cell volume homeostasis;sodium ion transmembrane transport;chloride ion homeostasis;potassium ion homeostasis;sodium ion homeostasis;renal sodium ion absorption;inorganic cation import across plasma membrane;chloride transmembrane transport;potassium ion import across plasma membrane	3	InterPro_GO_Terms_1	go_process:GO:0055085 transmembrane transport
g60147	gill	Scaffold_2541	2931	23036	Adra	Marchamalo	8.34680432827096	IPR004841 Amino acid permease/ SLC12A domain;IPR018491 SLC12A transporter, C-terminal	Na-Cl symporter	ion transport;potassium ion transport;sodium ion transport;chloride transport;cell volume homeostasis;sodium ion transmembrane transport;chloride ion homeostasis;potassium ion homeostasis;sodium ion homeostasis;renal sodium ion absorption;inorganic cation import across plasma membrane;chloride transmembrane transport;potassium ion import across plasma membrane	3	InterPro_GO_Terms_1	go_process:GO:0055085 transmembrane transport
g60147	gill	Scaffold_2541	2931	23036	Adra	Cabanes	7.51101982552168	IPR004841 Amino acid permease/ SLC12A domain;IPR018491 SLC12A transporter, C-terminal	Na-Cl symporter	ion transport;potassium ion transport;sodium ion transport;chloride transport;cell volume homeostasis;sodium ion transmembrane transport;chloride ion homeostasis;potassium ion homeostasis;sodium ion homeostasis;renal sodium ion absorption;inorganic cation import across plasma membrane;chloride transmembrane transport;potassium ion import across plasma membrane	3	InterPro_GO_Terms_1	go_process:GO:0055085 transmembrane transport
g62489	gill	Scaffold_2620	672317	673435	Marchamalo	Santa_Pola	2.69773327601298	IPR016449 Potassium channel, inwardly rectifying, Kir;IPR041647 Inward rectifier potassium channel, C-terminal;IPR013518 Potassium channel, inwardly rectifying, Kir, cytoplasmic;IPR040445 Potassium channel, inwardly rectifying, transmembrane domain;IPR003268 Potassium channel, inwardly rectifying, Kir1.1;IPR014756 Immunoglobulin E-set	IRK-1	kidney development;tissue homeostasis;response to ischemia;glucose metabolic process;potassium ion transport;muscle contraction;heart development;excretion;visual perception;adult walking behavior;regulation of heart contraction;response to blue light;post-embryonic development;gene expression;oligodendrocyte development;regulation of skeletal muscle contraction via regulation of action potential…	3	InterPro_GO_Terms_3	go_process:GO:0006813 potassium ion transport
g62489	gill	Scaffold_2620	672317	673435	Cabanes	Marchamalo	-2.51378471985766	IPR016449 Potassium channel, inwardly rectifying, Kir;IPR041647 Inward rectifier potassium channel, C-terminal;IPR013518 Potassium channel, inwardly rectifying, Kir, cytoplasmic;IPR040445 Potassium channel, inwardly rectifying, transmembrane domain;IPR003268 Potassium channel, inwardly rectifying, Kir1.1;IPR014756 Immunoglobulin E-set	IRK-1	kidney development;tissue homeostasis;response to ischemia;glucose metabolic process;potassium ion transport;muscle contraction;heart development;excretion;visual perception;adult walking behavior;regulation of heart contraction;response to blue light;post-embryonic development;gene expression;oligodendrocyte development;regulation of skeletal muscle contraction via regulation of action potential…	3	InterPro_GO_Terms_3	go_process:GO:0006813 potassium ion transport
g62489	gill	Scaffold_2620	672317	673435	Adra	Marchamalo	-4.18510437644981	IPR016449 Potassium channel, inwardly rectifying, Kir;IPR041647 Inward rectifier potassium channel, C-terminal;IPR013518 Potassium channel, inwardly rectifying, Kir, cytoplasmic;IPR040445 Potassium channel, inwardly rectifying, transmembrane domain;IPR003268 Potassium channel, inwardly rectifying, Kir1.1;IPR014756 Immunoglobulin E-set	IRK-1	kidney development;tissue homeostasis;response to ischemia;glucose metabolic process;potassium ion transport;muscle contraction;heart development;excretion;visual perception;adult walking behavior;regulation of heart contraction;response to blue light;post-embryonic development;gene expression;oligodendrocyte development;regulation of skeletal muscle contraction via regulation of action potential…	3	InterPro_GO_Terms_3	go_process:GO:0006813 potassium ion transport
g67071	gill	Scaffold_2793	229403	240622	Adra	Santa_Pola	10.9055774634851	IPR018491 SLC12A transporter, C-terminal;IPR004841 Amino acid permease/ SLC12A domain	Bumetanide-sensitive sodium-(potassium)-chloride cotransporter 2	kidney development;ion transport;potassium ion transport;sodium ion transport;chloride transport;cellular sodium ion homeostasis;cell volume homeostasis;hyperosmotic response;gamma-aminobutyric acid signaling pathway;aging;excretion;T cell chemotaxis;ammonium transport;diterpenoid metabolic process;cellular potassium ion homeostasis;transepithelial chloride transport;cellular chloride ion homeost…	3	InterPro_GO_Terms_4	go_process:GO:0055085 transmembrane transport
g67071	gill	Scaffold_2793	229403	240622	Adra	Marchamalo	9.0683086492555	IPR018491 SLC12A transporter, C-terminal;IPR004841 Amino acid permease/ SLC12A domain	Bumetanide-sensitive sodium-(potassium)-chloride cotransporter 2	kidney development;ion transport;potassium ion transport;sodium ion transport;chloride transport;cellular sodium ion homeostasis;cell volume homeostasis;hyperosmotic response;gamma-aminobutyric acid signaling pathway;aging;excretion;T cell chemotaxis;ammonium transport;diterpenoid metabolic process;cellular potassium ion homeostasis;transepithelial chloride transport;cellular chloride ion homeost…	3	InterPro_GO_Terms_4	go_process:GO:0055085 transmembrane transport
g67071	gill	Scaffold_2793	229403	240622	Adra	Cabanes	8.26090067098349	IPR018491 SLC12A transporter, C-terminal;IPR004841 Amino acid permease/ SLC12A domain	Bumetanide-sensitive sodium-(potassium)-chloride cotransporter 2	kidney development;ion transport;potassium ion transport;sodium ion transport;chloride transport;cellular sodium ion homeostasis;cell volume homeostasis;hyperosmotic response;gamma-aminobutyric acid signaling pathway;aging;excretion;T cell chemotaxis;ammonium transport;diterpenoid metabolic process;cellular potassium ion homeostasis;transepithelial chloride transport;cellular chloride ion homeost…	3	InterPro_GO_Terms_4	go_process:GO:0055085 transmembrane transport
g67657	gill	Scaffold_2812	1656886	1686966	Adra	Marchamalo	4.69162225510662	IPR003593 AAA+ ATPase domain;IPR003439 ABC transporter-like;IPR011527 ABC transporter type 1, transmembrane domain;IPR036640 ABC transporter type 1, transmembrane domain superfamily;IPR030275 Multidrug resistance protein 3;IPR039421 Type 1 protein exporter;IPR017871 ABC transporter, conserved site;IPR027417 P-loop containing nucleoside triphosphate hydrolase	ATP-dependent translocase ABCB1	G2/M transition of mitotic cell cycle;eye development;placenta development;fatty acid metabolic process;bile acid biosynthetic process;mitochondrial transport;drug transmembrane transport;lactation;bile acid metabolic process;gravitropism;response to auxin;auxin-activated signaling pathway;response to cytokinin;hormone transport;auxin polar transport;response to mycotoxin;response to ionizing rad…	3	InterPro_GO_Terms_4	go_process:GO:0055085 transmembrane transport
g67657	gill	Scaffold_2812	1656886	1686966	Adra	Cabanes	3.95754044744328	IPR003593 AAA+ ATPase domain;IPR003439 ABC transporter-like;IPR011527 ABC transporter type 1, transmembrane domain;IPR036640 ABC transporter type 1, transmembrane domain superfamily;IPR030275 Multidrug resistance protein 3;IPR039421 Type 1 protein exporter;IPR017871 ABC transporter, conserved site;IPR027417 P-loop containing nucleoside triphosphate hydrolase	ATP-dependent translocase ABCB1	G2/M transition of mitotic cell cycle;eye development;placenta development;fatty acid metabolic process;bile acid biosynthetic process;mitochondrial transport;drug transmembrane transport;lactation;bile acid metabolic process;gravitropism;response to auxin;auxin-activated signaling pathway;response to cytokinin;hormone transport;auxin polar transport;response to mycotoxin;response to ionizing rad…	3	InterPro_GO_Terms_4	go_process:GO:0055085 transmembrane transport
g67657	gill	Scaffold_2812	1656886	1686966	Adra	Santa_Pola	3.65531384229421	IPR003593 AAA+ ATPase domain;IPR003439 ABC transporter-like;IPR011527 ABC transporter type 1, transmembrane domain;IPR036640 ABC transporter type 1, transmembrane domain superfamily;IPR030275 Multidrug resistance protein 3;IPR039421 Type 1 protein exporter;IPR017871 ABC transporter, conserved site;IPR027417 P-loop containing nucleoside triphosphate hydrolase	ATP-dependent translocase ABCB1	G2/M transition of mitotic cell cycle;eye development;placenta development;fatty acid metabolic process;bile acid biosynthetic process;mitochondrial transport;drug transmembrane transport;lactation;bile acid metabolic process;gravitropism;response to auxin;auxin-activated signaling pathway;response to cytokinin;hormone transport;auxin polar transport;response to mycotoxin;response to ionizing rad…	3	InterPro_GO_Terms_4	go_process:GO:0055085 transmembrane transport
g10786	gill	Scaffold_463	223408	223950	Marchamalo	Santa_Pola	2.28705828584773	IPR013612 Amino acid permease, N-terminal;IPR002444 Solute carrier family 12 member 2	Solute carrier family 12 member 2	ion transport;potassium ion transport;sodium ion transport;chloride transport;cellular sodium ion homeostasis;cell volume homeostasis;hyperosmotic response;gamma-aminobutyric acid signaling pathway;aging;T cell chemotaxis;ammonium transport;cellular potassium ion homeostasis;transepithelial chloride transport;cellular chloride ion homeostasis;multicellular organism growth;maintenance of blood-bra…	2	InterPro_GO_Terms_1	go_process:GO:0006811 ion transport
g10786	gill	Scaffold_463	223408	223950	Cabanes	Marchamalo	-2.82796617063978	IPR013612 Amino acid permease, N-terminal;IPR002444 Solute carrier family 12 member 2	Solute carrier family 12 member 2	ion transport;potassium ion transport;sodium ion transport;chloride transport;cellular sodium ion homeostasis;cell volume homeostasis;hyperosmotic response;gamma-aminobutyric acid signaling pathway;aging;T cell chemotaxis;ammonium transport;cellular potassium ion homeostasis;transepithelial chloride transport;cellular chloride ion homeostasis;multicellular organism growth;maintenance of blood-bra…	2	InterPro_GO_Terms_1	go_process:GO:0006811 ion transport
g10792	gill	Scaffold_463	275857	280405	Marchamalo	Santa_Pola	2.11986184218135	IPR018491 SLC12A transporter, C-terminal;IPR002444 Solute carrier family 12 member 2	Bumetanide-sensitive sodium-(potassium)-chloride cotransporter 2	kidney development;ion transport;potassium ion transport;sodium ion transport;chloride transport;cellular sodium ion homeostasis;cell volume homeostasis;hyperosmotic response;gamma-aminobutyric acid signaling pathway;aging;excretion;T cell chemotaxis;ammonium transport;diterpenoid metabolic process;cellular potassium ion homeostasis;transepithelial chloride transport;cellular chloride ion homeost…	2	InterPro_GO_Terms_1	go_process:GO:0006811 ion transport
g10792	gill	Scaffold_463	275857	280405	Cabanes	Marchamalo	-2.51839576378224	IPR018491 SLC12A transporter, C-terminal;IPR002444 Solute carrier family 12 member 2	Bumetanide-sensitive sodium-(potassium)-chloride cotransporter 2	kidney development;ion transport;potassium ion transport;sodium ion transport;chloride transport;cellular sodium ion homeostasis;cell volume homeostasis;hyperosmotic response;gamma-aminobutyric acid signaling pathway;aging;excretion;T cell chemotaxis;ammonium transport;diterpenoid metabolic process;cellular potassium ion homeostasis;transepithelial chloride transport;cellular chloride ion homeost…	2	InterPro_GO_Terms_1	go_process:GO:0006811 ion transport
g11742	stomach	Scaffold_494	1919533	1987451	Cabanes	Marchamalo	4.328631144405	IPR002077 Voltage-dependent calcium channel, alpha-1 subunit;IPR005446 Voltage-dependent calcium channel, L-type, alpha-1 subunit;IPR014873 Voltage-dependent calcium channel, alpha-1 subunit, IQ domain;IPR031688 Voltage-gated calcium channel subunit alpha, C-terminal;IPR005821 Ion transport domain;IPR027359 Voltage-dependent channel domain superfamily;IPR008253 Marvel domain;IPR031649 Voltage-dep…	Synaptophysin	musculoskeletal movement, spinal reflex action;neuromuscular junction development;response to testosterone;fear response;glucose homeostasis;endocytosis;regulation of insulin secretion;positive regulation of CREB transcription factor activity;negative regulation of voltage-gated calcium channel activity;cellular response to amyloid-beta;central nervous system neuron differentiation;response to am…	2	InterPro_GO_Terms_5; InterPro_GO_Terms_7	go_process:GO:0055085 transmembrane transport; go_process:GO:0006811 ion transport
g13067	stomach	Scaffold_568	2635676	2654228	Cabanes	Marchamalo	10.6469099237415	IPR002153 Transient receptor potential channel, canonical;IPR005821 Ion transport domain;IPR005463 Transient receptor potential channel, canonical 7	Short transient receptor potential channel 1	single strand break repair;inter-male aggressive behavior;territorial aggressive behavior;cation transport;calcium ion transport;manganese ion transport;positive regulation of cytosolic calcium ion concentration;single fertilization;acrosome reaction;aging;phototransduction;female courtship behavior;regulation of gene expression;positive regulation of calcium ion transport into cytosol;positive r…	2	InterPro_GO_Terms_5; InterPro_GO_Terms_6	go_process:GO:0055085 transmembrane transport; go_process:GO:0006811 ion transport
g16206	stomach	Scaffold_689	1325557	1346720	Cabanes	Marchamalo	7.84416188589522	IPR036259 MFS transporter superfamily;IPR011701 Major facilitator superfamily;IPR020846 Major facilitator superfamily domain	Feline leukemia virus subgroup C receptor-related protein 2	spleen development;regulation of organ growth;in utero embryonic development;embryonic skeletal system morphogenesis;multicellular organism growth;mitochondrial transport;erythrocyte differentiation;blood vessel development;heme export;cellular iron ion homeostasis;erythrocyte maturation;head morphogenesis;limb morphogenesis;embryonic digit morphogenesis;heme transport	2	InterPro_GO_Terms_2	go_process:GO:0055085 transmembrane transport
g16206	stomach	Scaffold_689	1325557	1346720	Marchamalo	Santa_Pola	-7.53602443099457	IPR036259 MFS transporter superfamily;IPR011701 Major facilitator superfamily;IPR020846 Major facilitator superfamily domain	Feline leukemia virus subgroup C receptor-related protein 2	spleen development;regulation of organ growth;in utero embryonic development;embryonic skeletal system morphogenesis;multicellular organism growth;mitochondrial transport;erythrocyte differentiation;blood vessel development;heme export;cellular iron ion homeostasis;erythrocyte maturation;head morphogenesis;limb morphogenesis;embryonic digit morphogenesis;heme transport	2	InterPro_GO_Terms_2	go_process:GO:0055085 transmembrane transport
g16279	gill	Scaffold_689	2735709	2773963	Adra	Cabanes	-4.81664679314138	IPR006028 Gamma-aminobutyric acid A receptor/Glycine receptor alpha;IPR006201 Neurotransmitter-gated ion-channel;IPR001390 Gamma-aminobutyric-acid A receptor, alpha subunit;IPR036734 Neurotransmitter-gated ion-channel ligand-binding domain superfamily;IPR006029 Neurotransmitter-gated ion-channel transmembrane domain;IPR006202 Neurotransmitter-gated ion-channel ligand-binding domain;IPR005432 Gamm…	Gamma-aminobutyric acid receptor subunit alpha-2	sensory perception of sound;inner ear receptor cell development;chloride transmembrane transport;brain development;central nervous system development;behavioral fear response;regulation of neuron apoptotic process;regulation of neurotransmitter levels;synaptic transmission, GABAergic;regulation of membrane potential;gamma-aminobutyric acid signaling pathway;inhibitory synapse assembly;ion transme…	2	InterPro_GO_Terms_4; InterPro_GO_Terms_6	go_process:GO:0034220 ion transmembrane transport; go_process:GO:0006811 ion transport
g23106	stomach	Scaffold_1024	485460	503095	Marchamalo	Santa_Pola	-9.93610842033067	IPR014873 Voltage-dependent calcium channel, alpha-1 subunit, IQ domain;IPR005821 Ion transport domain;IPR031688 Voltage-gated calcium channel subunit alpha, C-terminal;IPR031649 Voltage-dependent L-type calcium channel, IQ-associated domain;IPR027359 Voltage-dependent channel domain superfamily	Voltage-dependent L-type calcium channel subunit alpha-1C	skeletal system development;regulation of neurotransmitter levels;behavioral fear response;positive regulation of neurotransmitter secretion;regulation of heart rate;extraocular skeletal muscle development;immune system development;calcium ion transport;cellular calcium ion homeostasis;muscle contraction;smooth muscle contraction;striated muscle contraction;endoplasmic reticulum organization;aden…	2	InterPro_GO_Terms_2; InterPro_GO_Terms_4	go_process:GO:0055085 transmembrane transport; go_process:GO:0006811 ion transport
g26250	gill	Scaffold_1152	3453476	3457355	Adra	Cabanes	-8.57532245380721	IPR015926 Cytolysin/lectin;IPR009104 Sea anemone actinoporin-like	NA	NA	2	InterPro_GO_Terms_5	go_process:GO:0006812 cation transport
g26250	gill	Scaffold_1152	3453476	3457355	Adra	Santa_Pola	-10.1740843186122	IPR015926 Cytolysin/lectin;IPR009104 Sea anemone actinoporin-like	NA	NA	2	InterPro_GO_Terms_5	go_process:GO:0006812 cation transport
g26657	gill	Scaffold_1172	31884	39332	Marchamalo	Santa_Pola	3.03079577262464	IPR004054 Potassium channel, voltage dependent, Kv4.1;IPR024587 Potassium channel, voltage dependent, Kv4, C-terminal;IPR028325 Voltage-gated potassium channel	Potassium voltage-gated channel subfamily D member 2	action potential;potassium ion transport;chemical synaptic transmission;associative learning;neuronal action potential;sensory perception of pain;regulation of ion transmembrane transport;cellular response to drug;locomotor rhythm;protein homooligomerization;cardiac conduction;cellular response to mechanical stimulus;cellular response to hypoxia;cellular response to BMP stimulus;potassium ion tra…	2	InterPro_GO_Terms_2	go_process:GO:0006813 potassium ion transport
g26657	gill	Scaffold_1172	31884	39332	Cabanes	Marchamalo	-8.61650249179357	IPR004054 Potassium channel, voltage dependent, Kv4.1;IPR024587 Potassium channel, voltage dependent, Kv4, C-terminal;IPR028325 Voltage-gated potassium channel	Potassium voltage-gated channel subfamily D member 2	action potential;potassium ion transport;chemical synaptic transmission;associative learning;neuronal action potential;sensory perception of pain;regulation of ion transmembrane transport;cellular response to drug;locomotor rhythm;protein homooligomerization;cardiac conduction;cellular response to mechanical stimulus;cellular response to hypoxia;cellular response to BMP stimulus;potassium ion tra…	2	InterPro_GO_Terms_2	go_process:GO:0006813 potassium ion transport
g30040	gill	Scaffold_1349	543436	582450	Adra	Marchamalo	3.03080135618024	IPR005828 Major facilitator, sugar transporter-like;IPR036259 MFS transporter superfamily	Solute carrier family 22 member 4	triglyceride metabolic process;sodium ion transport;mitochondrion organization;adult heart development;body fluid secretion;locomotory behavior;carnitine metabolic process;response to symbiotic bacterium;organic cation transport;quaternary ammonium group transport;carnitine transport;xenobiotic transport;reproductive structure development;positive regulation of intestinal epithelial structure mai…	2	InterPro_GO_Terms_3	go_process:GO:0055085 transmembrane transport
g30040	gill	Scaffold_1349	543436	582450	Adra	Marchamalo	3.03080135618024	IPR036259 MFS transporter superfamily;IPR011701 Major facilitator superfamily	Solute carrier family 22 member 4	triglyceride metabolic process;ion transport;sodium ion transport;mitochondrion organization;adult heart development;body fluid secretion;locomotory behavior;carnitine metabolic process;response to symbiotic bacterium;organic cation transport;quaternary ammonium group transport;carnitine transport;xenobiotic transport;reproductive structure development;positive regulation of intestinal epithelial…	2	InterPro_GO_Terms_2	go_process:GO:0055085 transmembrane transport
g32853	gill	Scaffold_1469	403351	441210	Adra	Santa_Pola	-4.79391796646476	IPR036397 Ribonuclease H superfamily;IPR005828 Major facilitator, sugar transporter-like;IPR038717 Tc1-like transposase, DDE domain;IPR005829 Sugar transporter, conserved site;IPR020846 Major facilitator superfamily domain;IPR036259 MFS transporter superfamily	Synaptic vesicle glycoprotein 2A	neurotransmitter uptake;neurotransmitter transport;cellular calcium ion homeostasis;chemical synaptic transmission;regulation of gamma-aminobutyric acid secretion;synaptic vesicle priming	2	InterPro_GO_Terms_4	go_process:GO:0055085 transmembrane transport
g32853	gill	Scaffold_1469	403351	441210	Adra	Marchamalo	-5.69948657636241	IPR036397 Ribonuclease H superfamily;IPR005828 Major facilitator, sugar transporter-like;IPR038717 Tc1-like transposase, DDE domain;IPR005829 Sugar transporter, conserved site;IPR020846 Major facilitator superfamily domain;IPR036259 MFS transporter superfamily	Synaptic vesicle glycoprotein 2A	neurotransmitter uptake;neurotransmitter transport;cellular calcium ion homeostasis;chemical synaptic transmission;regulation of gamma-aminobutyric acid secretion;synaptic vesicle priming	2	InterPro_GO_Terms_4	go_process:GO:0055085 transmembrane transport
g33496	gill	Scaffold_1485	166194	179974	Marchamalo	Santa_Pola	2.21964364966621	IPR004014 Cation-transporting P-type ATPase, N-terminal;IPR023214 HAD superfamily;IPR023299 P-type ATPase, cytoplasmic domain N;IPR005775 P-type ATPase subfamily IIC, subunit alpha;IPR001757 P-type ATPase;IPR006068 Cation-transporting P-type ATPase, C-terminal;IPR044492 P-type ATPase, haloacid dehalogenase domain;IPR018303 P-type ATPase, phosphorylation site;IPR008250 P-type ATPase, A domain supe…	Sodium/potassium-transporting ATPase subunit alpha-1	gastric acid secretion;pH reduction;regulation of vasoconstriction;energy coupled proton transmembrane transport, against electrochemical gradient;negative regulation of heart contraction;proton transmembrane transport;fertilization;response to temperature stimulus;sodium ion transmembrane transport;behavioral fear response;adult locomotory behavior;jump response;transport across blood-brain barr…	2	InterPro_GO_Terms_3	go_process:GO:0006813 potassium ion transport
g33496	gill	Scaffold_1485	166194	179974	Cabanes	Marchamalo	-2.18722612498988	IPR004014 Cation-transporting P-type ATPase, N-terminal;IPR023214 HAD superfamily;IPR023299 P-type ATPase, cytoplasmic domain N;IPR005775 P-type ATPase subfamily IIC, subunit alpha;IPR001757 P-type ATPase;IPR006068 Cation-transporting P-type ATPase, C-terminal;IPR044492 P-type ATPase, haloacid dehalogenase domain;IPR018303 P-type ATPase, phosphorylation site;IPR008250 P-type ATPase, A domain supe…	Sodium/potassium-transporting ATPase subunit alpha-1	gastric acid secretion;pH reduction;regulation of vasoconstriction;energy coupled proton transmembrane transport, against electrochemical gradient;negative regulation of heart contraction;proton transmembrane transport;fertilization;response to temperature stimulus;sodium ion transmembrane transport;behavioral fear response;adult locomotory behavior;jump response;transport across blood-brain barr…	2	InterPro_GO_Terms_3	go_process:GO:0006813 potassium ion transport
g35151	gill	Scaffold_1591	688648	689142	Marchamalo	Santa_Pola	7.80648771718126	IPR000515 ABC transporter type 1, transmembrane domain MetI-like	NA	NA	2	InterPro_GO_Terms_1	go_process:GO:0055085 transmembrane transport
g35151	gill	Scaffold_1591	688648	689142	Adra	Marchamalo	-7.77882464572827	IPR000515 ABC transporter type 1, transmembrane domain MetI-like	NA	NA	2	InterPro_GO_Terms_1	go_process:GO:0055085 transmembrane transport
g36428	gill	Scaffold_1663	1675938	1709039	Cabanes	Marchamalo	-2.04234163763122	IPR036259 MFS transporter superfamily;IPR011701 Major facilitator superfamily	Membrane-associated transporter protein	visual perception;sucrose transport;melanin biosynthetic process;developmental pigmentation;response to stimulus;glucose transmembrane transport	2	InterPro_GO_Terms_2	go_process:GO:0055085 transmembrane transport
g36428	stomach	Scaffold_1663	1675938	1709039	Cabanes	Marchamalo	-2.63973333171769	IPR036259 MFS transporter superfamily;IPR011701 Major facilitator superfamily	Membrane-associated transporter protein	visual perception;sucrose transport;melanin biosynthetic process;developmental pigmentation;response to stimulus;glucose transmembrane transport	2	InterPro_GO_Terms_2	go_process:GO:0055085 transmembrane transport
g37387	stomach	Scaffold_1705	227423	237846	Cabanes	Marchamalo	-3.62766029381688	IPR004837 Sodium/calcium exchanger membrane region;IPR004481 Sodium/potassium/calcium exchanger;IPR030245 Sodium/potassium/calcium exchanger 5	Na(+)/K(+)/Ca(2+)-exchange protein 3	ion transport;cation transport;sodium ion transport;calcium ion transport;cellular calcium ion homeostasis;visual perception;sensory perception of smell;positive regulation of gene expression;negative regulation of gene expression;bone mineralization;melanocyte differentiation;ion transmembrane transport;sodium ion transmembrane transport;negative regulation of melanin biosynthetic process;respon…	2	InterPro_GO_Terms_2	go_process:GO:0055085 transmembrane transport
g37387	stomach	Scaffold_1705	227423	237846	Adra	Marchamalo	-4.19258370071321	IPR004837 Sodium/calcium exchanger membrane region;IPR004481 Sodium/potassium/calcium exchanger;IPR030245 Sodium/potassium/calcium exchanger 5	Na(+)/K(+)/Ca(2+)-exchange protein 3	ion transport;cation transport;sodium ion transport;calcium ion transport;cellular calcium ion homeostasis;visual perception;sensory perception of smell;positive regulation of gene expression;negative regulation of gene expression;bone mineralization;melanocyte differentiation;ion transmembrane transport;sodium ion transmembrane transport;negative regulation of melanin biosynthetic process;respon…	2	InterPro_GO_Terms_2	go_process:GO:0055085 transmembrane transport
g44208	stomach	Scaffold_1968	673638	742409	Cabanes	Marchamalo	9.79131450192224	IPR004056 Potassium channel, voltage dependent, Kv4.3;IPR005821 Ion transport domain;IPR024587 Potassium channel, voltage dependent, Kv4, C-terminal;IPR028325 Voltage-gated potassium channel	Potassium voltage-gated channel subfamily A member 2	action potential;potassium ion transport;Notch signaling pathway;chemical synaptic transmission;associative learning;response to mechanical stimulus;response to organic substance;magnesium ion homeostasis;regulation of dopamine secretion;neuronal action potential;regulation of vasoconstriction;sensory perception of pain;optic nerve structural organization;regulation of ion transmembrane transport…	2	InterPro_GO_Terms_5; InterPro_GO_Terms_7	go_process:GO:0055085 transmembrane transport; go_process:GO:0006811 ion transport
g50716	stomach	Scaffold_2212	1102058	1123899	Cabanes	Marchamalo	4.48417510943677	IPR002293 Amino acid/polyamine transporter I	L-type amino acid transporter 2	regulation of arginine metabolic process;positive regulation of cytokine production involved in immune response;amino acid transmembrane transport;glutathione metabolic process;amino acid transport;visual learning;response to toxic substance;negative regulation of gene expression;response to organic cyclic compound;neutral amino acid transport;L-amino acid transport;L-cystine transport;glycine tr…	2	InterPro_GO_Terms_2	go_process:GO:0055085 transmembrane transport
g50716	stomach	Scaffold_2212	1102058	1123899	Marchamalo	Santa_Pola	-4.50885614954375	IPR002293 Amino acid/polyamine transporter I	L-type amino acid transporter 2	regulation of arginine metabolic process;positive regulation of cytokine production involved in immune response;amino acid transmembrane transport;glutathione metabolic process;amino acid transport;visual learning;response to toxic substance;negative regulation of gene expression;response to organic cyclic compound;neutral amino acid transport;L-amino acid transport;L-cystine transport;glycine tr…	2	InterPro_GO_Terms_2	go_process:GO:0055085 transmembrane transport
g51907	gill	Scaffold_2261	463425	466345	Adra	Marchamalo	2.14027891119361	IPR029581 Transient receptor potential cation channel subfamily M member 4	NA	NA	2	InterPro_GO_Terms_2; InterPro_GO_Terms_3	go_process:GO:0034220 ion transmembrane transport; go_process:GO:0006812 cation transport
g51923	gill	Scaffold_2261	537883	552593	Adra	Marchamalo	2.03823247347905	IPR002153 Transient receptor potential channel, canonical;IPR029581 Transient receptor potential cation channel subfamily M member 4	Calcium-activated non-selective cation channel 1	temperature homeostasis;adaptive immune response;dendritic cell chemotaxis;regulation of T cell cytokine production;calcium ion transport;manganese ion transport;positive regulation of cytosolic calcium ion concentration;G protein-coupled glutamate receptor signaling pathway;visual perception;positive regulation of cell population proliferation;response to heat;positive regulation of heart rate;r…	2	InterPro_GO_Terms_5; InterPro_GO_Terms_6	go_process:GO:0034220 ion transmembrane transport; go_process:GO:0006812 cation transport
g52504	gill	Scaffold_2287	757429	762740	Marchamalo	Santa_Pola	2.19886697185248	IPR005821 Ion transport domain;IPR027359 Voltage-dependent channel domain superfamily;IPR043203 Voltage-gated cation channel calcium and sodium	Sodium channel protein type 10 subunit alpha	action potential;regulation of heart rate;cardiac ventricle development;brainstem development;cation transport;potassium ion transport;sodium ion transport;muscle contraction;inflammatory response;nervous system development;peripheral nervous system development;muscle organ development;sensory perception;sensory perception of sound;memory;locomotory behavior;adult walking behavior;adult locomotor…	2	InterPro_GO_Terms_2; InterPro_GO_Terms_4	go_process:GO:0055085 transmembrane transport; go_process:GO:0006811 ion transport
g54260	gill	Scaffold_2340	1422437	1446935	Adra	Santa_Pola	3.01048022728258	IPR006201 Neurotransmitter-gated ion-channel;IPR000477 Reverse transcriptase domain;IPR006029 Neurotransmitter-gated ion-channel transmembrane domain;IPR015095 Alkylated DNA repair protein AlkB, homologue 8, N-terminal;IPR006202 Neurotransmitter-gated ion-channel ligand-binding domain;IPR036734 Neurotransmitter-gated ion-channel ligand-binding domain superfamily;IPR018000 Neurotransmitter-gated i…	NA	NA	2	InterPro_GO_Terms_4	go_process:GO:0034220 ion transmembrane transport
g54260	gill	Scaffold_2340	1422437	1446935	Adra	Marchamalo	2.62671496632636	IPR006201 Neurotransmitter-gated ion-channel;IPR000477 Reverse transcriptase domain;IPR006029 Neurotransmitter-gated ion-channel transmembrane domain;IPR015095 Alkylated DNA repair protein AlkB, homologue 8, N-terminal;IPR006202 Neurotransmitter-gated ion-channel ligand-binding domain;IPR036734 Neurotransmitter-gated ion-channel ligand-binding domain superfamily;IPR018000 Neurotransmitter-gated i…	NA	NA	2	InterPro_GO_Terms_4	go_process:GO:0034220 ion transmembrane transport
g55657	gill	Scaffold_2391	577067	590201	Adra	Marchamalo	-4.41106113534571	IPR003050 P2X7 purinoceptor;IPR001429 P2X purinoreceptor;IPR027309 P2X purinoreceptor extracellular domain superfamily	ATP receptor	activation of MAPK activity;response to hypoxia;phagolysosome assembly;positive regulation of T cell mediated cytotoxicity;regulation of sodium ion transport;response to ischemia;detection of hypoxic conditions in blood by carotid body chemoreceptor signaling;membrane protein ectodomain proteolysis;phospholipid transfer to membrane;nitric oxide biosynthetic process;ion transport;cation transport;…	2	InterPro_GO_Terms_4	go_process:GO:0006811 ion transport
g55657	gill	Scaffold_2391	577067	590201	Adra	Cabanes	-4.52592170726536	IPR003050 P2X7 purinoceptor;IPR001429 P2X purinoreceptor;IPR027309 P2X purinoreceptor extracellular domain superfamily	ATP receptor	activation of MAPK activity;response to hypoxia;phagolysosome assembly;positive regulation of T cell mediated cytotoxicity;regulation of sodium ion transport;response to ischemia;detection of hypoxic conditions in blood by carotid body chemoreceptor signaling;membrane protein ectodomain proteolysis;phospholipid transfer to membrane;nitric oxide biosynthetic process;ion transport;cation transport;…	2	InterPro_GO_Terms_4	go_process:GO:0006811 ion transport
g56869	gill	Scaffold_2425	1640709	1656054	Adra	Santa_Pola	2.52056675920464	IPR018410 Na+/H+ exchanger, isoforms 3/5;IPR006153 Cation/H+ exchanger;IPR004709 Na+/H+ exchanger;IPR018422 Cation/H+ exchanger, CPA1 family	Solute carrier family 9 member 1	reproduction;regulation of the force of heart contraction;regulation of sodium ion transport;nematode larval development;ion transport;sodium ion transport;cellular sodium ion homeostasis;regulation of pH;receptor-mediated endocytosis;circadian rhythm;determination of adult lifespan;response to acidic pH;positive regulation of cardiac muscle hypertrophy;regulation of cardiac muscle contraction by…	2	InterPro_GO_Terms_6; InterPro_GO_Terms_7	go_process:GO:0055085 transmembrane transport; go_process:GO:0006812 cation transport
g57072	stomach	Scaffold_2432	1224570	1237197	Cabanes	Marchamalo	12.0108364939412	IPR001429 P2X purinoreceptor;IPR027309 P2X purinoreceptor extracellular domain superfamily;IPR003048 P2X5 purinoceptor	ATP receptor	activation of MAPK activity;cell morphogenesis;response to hypoxia;positive regulation of cytokine production;phagolysosome assembly;tissue homeostasis;positive regulation of T cell mediated cytotoxicity;positive regulation of protein phosphorylation;regulation of sodium ion transport;serotonin secretion by platelet;response to ischemia;detection of hypoxic conditions in blood by carotid body che…	2	InterPro_GO_Terms_8	go_process:GO:0006811 ion transport
g57072	stomach	Scaffold_2432	1224570	1237197	Marchamalo	Santa_Pola	-12.198500237607	IPR001429 P2X purinoreceptor;IPR027309 P2X purinoreceptor extracellular domain superfamily;IPR003048 P2X5 purinoceptor	ATP receptor	activation of MAPK activity;cell morphogenesis;response to hypoxia;positive regulation of cytokine production;phagolysosome assembly;tissue homeostasis;positive regulation of T cell mediated cytotoxicity;positive regulation of protein phosphorylation;regulation of sodium ion transport;serotonin secretion by platelet;response to ischemia;detection of hypoxic conditions in blood by carotid body che…	2	InterPro_GO_Terms_8	go_process:GO:0006811 ion transport
g60864	gill	Scaffold_2563	100571	115124	Cabanes	Marchamalo	3.13308685064573	IPR004709 Na+/H+ exchanger;IPR006153 Cation/H+ exchanger;IPR018422 Cation/H+ exchanger, CPA1 family	Solute carrier family 9 member 1	gastric acid secretion;regulation of the force of heart contraction;regulation of sodium ion transport;epithelial cell development;ion transport;sodium ion transport;cellular sodium ion homeostasis;regulation of pH;receptor-mediated endocytosis;circadian rhythm;protein localization;response to salt stress;response to acidic pH;positive regulation of cardiac muscle hypertrophy;regulation of cardia…	2	InterPro_GO_Terms_3; InterPro_GO_Terms_7	go_process:GO:0055085 transmembrane transport; go_process:GO:0006812 cation transport
g6487	stomach	Scaffold_269	107757	115991	Cabanes	Marchamalo	3.62195446613949	IPR009262 Solute carrier family 35 member SLC35F1/F2/F6	Solute carrier family 35 member F2	NA	2	InterPro_GO_Terms_3	go_process:GO:0055085 transmembrane transport
g69664	stomach	Scaffold_2890	10597	109306	Cabanes	Santa_Pola	8.2763057529581	IPR002077 Voltage-dependent calcium channel, alpha-1 subunit;IPR005446 Voltage-dependent calcium channel, L-type, alpha-1 subunit;IPR014873 Voltage-dependent calcium channel, alpha-1 subunit, IQ domain;IPR027359 Voltage-dependent channel domain superfamily;IPR005821 Ion transport domain;IPR031649 Voltage-dependent L-type calcium channel, IQ-associated domain;IPR031688 Voltage-gated calcium channe…	Voltage-dependent L-type calcium channel subunit alpha-1C	skeletal system development;ossification;regulation of neurotransmitter levels;behavioral fear response;positive regulation of neurotransmitter secretion;regulation of heart rate;extraocular skeletal muscle development;immune system development;calcium ion transport;cellular calcium ion homeostasis;muscle contraction;smooth muscle contraction;striated muscle contraction;endoplasmic reticulum orga…	2	InterPro_GO_Terms_5; InterPro_GO_Terms_7	go_process:GO:0055085 transmembrane transport; go_process:GO:0006811 ion transport
g71485	stomach	Scaffold_2964	1583808	1618219	Cabanes	Marchamalo	9.21372955990599	IPR004837 Sodium/calcium exchanger membrane region;IPR004481 Sodium/potassium/calcium exchanger;IPR030232 Sodium/potassium/calcium exchanger 4	Na(+)/K(+)/Ca(2+)-exchange protein 3	ion transport;cation transport;calcium ion transport;cellular calcium ion homeostasis;visual perception;sensory perception of smell;response to light intensity;positive regulation of gene expression;negative regulation of gene expression;bone mineralization;melanocyte differentiation;ion transmembrane transport;sodium ion transmembrane transport;negative regulation of melanin biosynthetic process…	2	InterPro_GO_Terms_2; InterPro_GO_Terms_3	go_process:GO:0055085 transmembrane transport; go_process:GO:0006811 ion transport
g10039	gill	Scaffold_431	174053	211302	Adra	Marchamalo	2.41574654731246	IPR001717 Anion exchange protein;IPR003020 Bicarbonate transporter, eukaryotic;IPR009071 High mobility group box domain;IPR016152 Phosphotransferase/anion transporter;IPR013769 Band 3 cytoplasmic domain;IPR036910 High mobility group box domain superfamily;IPR011531 Bicarbonate transporter, C-terminal;IPR018241 Anion exchange, conserved site	AE 2	anion transport;chloride transport;cellular ion homeostasis;spermatogenesis;blood coagulation;circadian rhythm;response to water deprivation;response to carbon dioxide;response to alkaline pH;response to acidic pH;response to activity;bicarbonate transport;plasma membrane phospholipid scrambling;response to nutrient levels;negative regulation of urine volume;positive regulation of T cell prolifer…	1	InterPro_GO_Terms_1	go_process:GO:0006820 anion transport
g10688	stomach	Scaffold_459	3000227	3014956	Cabanes	Marchamalo	-12.3650277258594	IPR038377 Sodium/glucose symporter superfamily;IPR001734 Sodium/solute symporter;IPR018212 Sodium/solute symporter, conserved site	Na(+)/I(-) cotransporter	thyroid hormone generation;ion transport;sodium ion transport;iodide transport;cellular response to cAMP;cellular response to gonadotropin stimulus;transport across blood-brain barrier;iodide transmembrane transport	1	InterPro_GO_Terms_2	go_process:GO:0055085 transmembrane transport
g11806	stomach	Scaffold_494	3367625	3372425	Adra	Cabanes	-11.8650568436002	IPR015095 Alkylated DNA repair protein AlkB, homologue 8, N-terminal;IPR011701 Major facilitator superfamily;IPR036259 MFS transporter superfamily;IPR020846 Major facilitator superfamily domain	MCT 1	pyruvate metabolic process;lipid metabolic process;centrosome cycle;monocarboxylic acid transport;lactate transport;mevalonate transport;response to food;lactate transmembrane transport;plasma membrane lactate transport;glucose homeostasis;regulation of insulin secretion;leukocyte migration;behavioral response to nutrient;cellular response to organic cyclic compound;transport across blood-brain b…	1	InterPro_GO_Terms_4	go_process:GO:0055085 transmembrane transport
g12984	gill	Scaffold_568	1252649	1260601	Adra	Santa_Pola	3.14834202849782	IPR002394 Nicotinic acetylcholine receptor;IPR006201 Neurotransmitter-gated ion-channel;IPR036734 Neurotransmitter-gated ion-channel ligand-binding domain superfamily;IPR006029 Neurotransmitter-gated ion-channel transmembrane domain;IPR006202 Neurotransmitter-gated ion-channel ligand-binding domain;IPR018000 Neurotransmitter-gated ion-channel, conserved site;IPR036719 Neurotransmitter-gated ion-c…	Acetylcholine receptor subunit alpha	action potential;conditioned taste aversion;response to hypoxia;skeletal muscle contraction;chondrocyte intercalation involved in growth plate cartilage morphogenesis;ion transport;cation transport;calcium ion transport;regulation of muscle contraction;smooth muscle contraction;regulation of smooth muscle contraction;response to oxidative stress;signal transduction;activation of transmembrane rec…	1	InterPro_GO_Terms_7	go_process:GO:0034220 ion transmembrane transport
g14273	stomach	Scaffold_625	97214	163176	Cabanes	Marchamalo	11.9060022375803	IPR006043 Xanthine/uracil/vitamin C permease;IPR006042 Xanthine/uracil permease	Na(+)/L-ascorbic acid transporter 2	sodium ion transport;response to oxidative stress;brain development;response to toxic substance;nucleobase transport;L-ascorbic acid transmembrane transport;L-ascorbic acid metabolic process;lung development;dehydroascorbic acid transport;transepithelial L-ascorbic acid transport;cellular response to ethanol;negative regulation of neuron death;positive regulation of dendrite extension	1	InterPro_GO_Terms_2	go_process:GO:0055085 transmembrane transport
g17216	stomach	Scaffold_716	779308	817856	Cabanes	Marchamalo	-2.33816892842312	IPR003689 Zinc/iron permease	Metal cation symporter ZIP14	regulation of membrane potential;arginine metabolic process;epiboly involved in gastrulation with mouth forming second;positive regulation of G protein-coupled receptor signaling pathway;positive regulation of B cell receptor signaling pathway;gonadal mesoderm development;manganese ion homeostasis;germ cell migration;iron ion import across plasma membrane;positive regulation of B cell proliferati…	1	InterPro_GO_Terms_1	go_process:GO:0055085 transmembrane transport
g17793	stomach	Scaffold_727	419484	446368	Cabanes	Marchamalo	11.7388444989169	IPR001734 Sodium/solute symporter;IPR038377 Sodium/glucose symporter superfamily	Hemicholinium-3-sensitive choline transporter	in utero embryonic development;amino acid transmembrane transport;sodium ion transport;neurotransmitter secretion;synaptic transmission, cholinergic;neuromuscular synaptic transmission;acetylcholine biosynthetic process;choline transport;transmembrane transport	1	InterPro_GO_Terms_2	go_process:GO:0055085 transmembrane transport
g17954	stomach	Scaffold_727	3584672	3600189	Cabanes	Marchamalo	6.86927760368253	IPR003644 Na-Ca exchanger/integrin-beta4;IPR004837 Sodium/calcium exchanger membrane region;IPR038081 CalX-like domain superfamily;IPR004836 Sodium/calcium exchanger protein;IPR032452 Sodium/calcium exchanger domain, C-terminal extension	Na(+)/Ca(2+)-exchange protein 1	response to hypoxia;embryonic placenta development;regulation of the force of heart contraction;regulation of heart rate;regulation of sodium ion transport;hematopoietic progenitor cell differentiation;response to ischemia;heart morphogenesis;ion transport;sodium ion transport;calcium ion transport;mitochondrial calcium ion transmembrane transport;cellular calcium ion homeostasis;cellular sodium …	1	InterPro_GO_Terms_3	go_process:GO:0055085 transmembrane transport
g19528	stomach	Scaffold_804	4014399	4048631	Marchamalo	Santa_Pola	-7.13395131381122	IPR007603 Choline transporter-like	Choline transporter-like protein 2	phosphatidylcholine biosynthetic process;choline transport;positive regulation of I-kappaB kinase/NF-kappaB signaling;neutrophil degranulation;transmembrane transport	1	InterPro_GO_Terms_2	go_process:GO:0055085 transmembrane transport
g20761	stomach	Scaffold_875	2305272	2332816	Cabanes	Marchamalo	-5.14024611022831	IPR001807 Chloride channel, voltage gated;IPR014743 Chloride channel, core	Chloride channel protein 2	kidney development;renal water homeostasis;renal water transport;chloride transport;muscle contraction;excretion;body fluid secretion;response to pH;response to water deprivation;neuronal action potential propagation;transepithelial chloride transport;lung development;regulation of aldosterone biosynthetic process;ion transmembrane transport;regulation of ion transmembrane transport;transepitheli…	1	InterPro_GO_Terms_2	go_process:GO:0055085 transmembrane transport
g2355	stomach	Scaffold_113	825810	853288	Cabanes	Marchamalo	4.37664708618429	IPR004156 Organic anion transporter polypeptide;IPR036259 MFS transporter superfamily;IPR002350 Kazal domain;IPR036058 Kazal domain superfamily	NA	NA	1	InterPro_GO_Terms_1	go_process:GO:0055085 transmembrane transport
g24141	stomach	Scaffold_1083	85196	87295	Cabanes	Marchamalo	-2.11458776634574	IPR038377 Sodium/glucose symporter superfamily;IPR001734 Sodium/solute symporter;IPR018212 Sodium/solute symporter, conserved site	High affinity sodium-glucose cotransporter	alpha-glucoside transport;metanephros development;intestinal D-glucose absorption;inositol metabolic process;sodium ion transport;apoptotic process;peripheral nervous system development;carbohydrate transport;hexose transmembrane transport;response to inorganic substance;pentose transmembrane transport;fucose transmembrane transport;galactose transmembrane transport;polyol transport;myo-inositol …	1	InterPro_GO_Terms_2	go_process:GO:0055085 transmembrane transport
g24607	stomach	Scaffold_1110	1402600	1410948	Cabanes	Marchamalo	3.2617333029158	IPR002067 Mitochondrial carrier protein;IPR018108 Mitochondrial substrate/solute carrier;IPR023395 Mitochondrial carrier domain superfamily	Mitochondrial coenzyme A transporter SLC25A42	mitochondrial transport;mitochondrial membrane organization;ADP transport;ATP transport;coenzyme A transmembrane transport;transmembrane transport;AMP transport	1	InterPro_GO_Terms_1	go_process:GO:0055085 transmembrane transport
g29285	stomach	Scaffold_1320	408264	418900	Cabanes	Marchamalo	-6.09155448417883	IPR002293 Amino acid/polyamine transporter I	L-type amino acid transporter 2	regulation of arginine metabolic process;positive regulation of cytokine production involved in immune response;amino acid transmembrane transport;glutathione metabolic process;amino acid transport;visual learning;response to toxic substance;negative regulation of gene expression;response to organic cyclic compound;neutral amino acid transport;L-amino acid transport;L-cystine transport;glycine tr…	1	InterPro_GO_Terms_2	go_process:GO:0055085 transmembrane transport
g29287	stomach	Scaffold_1320	419617	425382	Cabanes	Marchamalo	-5.64477302130572	IPR000477 Reverse transcriptase domain;IPR002293 Amino acid/polyamine transporter I;IPR043502 DNA/RNA polymerase superfamily	Glycoprotein-associated amino acid transporter b0,+AT1	amino acid transport;neutral amino acid transport;L-cystine transport;leukocyte migration;protein-containing complex assembly	1	InterPro_GO_Terms_2	go_process:GO:0055085 transmembrane transport
g30036	stomach	Scaffold_1349	511167	513331	Cabanes	Marchamalo	-4.66806475942597	IPR011701 Major facilitator superfamily;IPR036259 MFS transporter superfamily;IPR005829 Sugar transporter, conserved site;IPR020846 Major facilitator superfamily domain	Solute carrier family 22 member 4	triglyceride metabolic process;sodium ion transport;mitochondrion organization;adult heart development;body fluid secretion;locomotory behavior;carnitine metabolic process;response to symbiotic bacterium;organic cation transport;quaternary ammonium group transport;carnitine transport;xenobiotic transport;reproductive structure development;positive regulation of intestinal epithelial structure mai…	1	InterPro_GO_Terms_2	go_process:GO:0055085 transmembrane transport
g3189	gill	Scaffold_140	2583238	2589094	Cabanes	Marchamalo	-4.58827508198854	IPR003930 Potassium channel, calcium-activated, BK, beta subunit;IPR015382 KCNMB2, ball/chain domain;IPR037096 KCNMB2, ball/chain domain superfamily	BK channel subunit beta-2	action potential;detection of calcium ion;potassium ion transport;neuronal action potential;regulation of vasoconstriction	1	InterPro_GO_Terms_3	go_process:GO:0006813 potassium ion transport
g32296	stomach	Scaffold_1425	21351	36542	Cabanes	Marchamalo	-4.6540365797094	IPR038770 Sodium/solute symporter superfamily;IPR006153 Cation/H+ exchanger;IPR037072 Sodium/hydrogen exchanger 9B2	NHE domain-containing protein 2	sodium ion transport;single fertilization;monovalent inorganic cation transport;flagellated sperm motility;ion transmembrane transport;regulation of intracellular pH;regulation of insulin secretion involved in cellular response to glucose stimulus;clathrin-dependent endocytosis;positive regulation of osteoclast development	1	InterPro_GO_Terms_3	go_process:GO:0055085 transmembrane transport
g32313	stomach	Scaffold_1430	24613	45881	Cabanes	Marchamalo	3.48172243761865	IPR011547 SLC26A/SulP transporter domain;IPR002645 STAS domain;IPR036513 STAS domain superfamily;IPR001902 SLC26A/SulP transporter;IPR030282 Prestin;IPR018045 Sulphate anion transporter, conserved site	Prestin	response to ischemia;ion transport;chloride transport;regulation of pH;sensory perception of sound;sulfate transport;regulation of cell shape;response to salicylic acid;animal organ morphogenesis;response to auditory stimulus;inorganic anion transport;bicarbonate transport;formate transport;fructose transmembrane transport;mannitol transport;oxalate transport;transepithelial chloride transport;re…	1	InterPro_GO_Terms_5	go_process:GO:0055085 transmembrane transport
g32915	gill	Scaffold_1472	53055	56652	Adra	Marchamalo	-2.31376518446238	IPR008347 Transient receptor potential channel, vanilloid 1-4;IPR002110 Ankyrin repeat;IPR020683 Ankyrin repeat-containing domain;IPR036770 Ankyrin repeat-containing domain superfamily;IPR024865 Transient receptor potential channel, vanilloid 2;IPR024862 Transient receptor potential cation channel subfamily V	OTRPC1	negative regulation of transcription by RNA polymerase II;temperature homeostasis;fever generation;microglial cell activation;diet induced thermogenesis;peptide secretion;negative regulation of systemic arterial blood pressure;lipid metabolic process;cation transport;calcium ion transport;cellular calcium ion homeostasis;cell volume homeostasis;response to osmotic stress;hypotonic response;actin …	1	InterPro_GO_Terms_2	go_process:GO:0006811 ion transport
g35779	gill	Scaffold_1620	5560212	5598810	Adra	Marchamalo	2.13358651418491	IPR001717 Anion exchange protein;IPR003020 Bicarbonate transporter, eukaryotic;IPR011531 Bicarbonate transporter, C-terminal;IPR013769 Band 3 cytoplasmic domain;IPR016152 Phosphotransferase/anion transporter;IPR002978 Anion exchange protein 2	AE 2	anion transport;chloride transport;cellular ion homeostasis;spermatogenesis;blood coagulation;visual perception;circadian rhythm;response to water deprivation;response to carbon dioxide;response to alkaline pH;response to acidic pH;response to activity;bicarbonate transport;plasma membrane phospholipid scrambling;cochlear nucleus development;response to nutrient levels;negative regulation of urin…	1	InterPro_GO_Terms_1	go_process:GO:0006820 anion transport
g36618	stomach	Scaffold_1663	5779319	5805688	Cabanes	Marchamalo	-3.58581870734393	IPR007603 Choline transporter-like	Choline transporter-like protein 2	phosphatidylcholine biosynthetic process;acetylcholine biosynthetic process;choline transport;positive regulation of cell growth;thiamine pyrophosphate transmembrane transport;otolith formation;neuromast hair cell development;positive regulation of I-kappaB kinase/NF-kappaB signaling;neutrophil degranulation;otolith development;transmembrane transport;acetylcholine secretion	1	InterPro_GO_Terms_2	go_process:GO:0055085 transmembrane transport
g36626	stomach	Scaffold_1663	5862246	5876585	Cabanes	Marchamalo	5.86057442586868	IPR027469 Cation efflux transmembrane domain superfamily;IPR002524 Cation efflux protein;IPR033572 Zinc transporter 8	Solute carrier family 30 member 3	zinc ion transport;cellular zinc ion homeostasis;lactation;response to toxic substance;response to glucose;response to zinc ion;detoxification of zinc ion;insulin secretion;positive regulation of insulin secretion;sequestering of zinc ion;response to vitamin A;response to interferon-gamma;positive regulation of transport;zinc ion homeostasis;regulation of vesicle-mediated transport;regulation of …	1	InterPro_GO_Terms_2	go_process:GO:0055085 transmembrane transport
g39581	stomach	Scaffold_1807	44303	60380	Cabanes	Marchamalo	11.4500912311148	IPR004841 Amino acid permease/ SLC12A domain	Cationic amino acid transporter 2	eye development;nitric oxide production involved in inflammatory response;nitric oxide biosynthetic process;amino acid transport;negative regulation of phosphatase activity;basic amino acid transport;L-amino acid transport;arginine transport;lysine transport;ornithine transport;regulation of TOR signaling;positive regulation of T cell proliferation;macrophage activation;regulation of macrophage a…	1	InterPro_GO_Terms_1	go_process:GO:0055085 transmembrane transport
g42121	stomach	Scaffold_1904	2942460	2963298	Cabanes	Marchamalo	5.31095908328139	IPR000539 Frizzled/Smoothened, transmembrane domain;IPR020067 Frizzled domain;IPR004837 Sodium/calcium exchanger membrane region;IPR036790 Frizzled cysteine-rich domain superfamily;IPR005185 Inner membrane component domain;IPR015526 Frizzled/secreted frizzled-related protein;IPR026544 Smoothened;IPR017981 GPCR, family 2-like;IPR041771 Smoothened, cysteine-rich domain;IPR035683 Smoothened, transme…	SMO	negative regulation of transcription by RNA polymerase II;ossification;vasculogenesis;osteoblast differentiation;in utero embryonic development;cell fate specification;neural crest cell migration;heart looping;positive regulation of neuroblast proliferation;positive regulation of mesenchymal cell proliferation;heart morphogenesis;determination of left/right asymmetry in lateral mesoderm;type B pa…	1	InterPro_GO_Terms_5	go_process:GO:0055085 transmembrane transport
g43104	gill	Scaffold_1926	344371	346018	Adra	Marchamalo	2.06937964027246	IPR000425 Major intrinsic protein;IPR023271 Aquaporin-like;IPR034294 Aquaporin transporter;IPR022357 Major intrinsic protein, conserved site	Lens fiber major intrinsic protein	lens development in camera-type eye;renal system process;renal water homeostasis;glomerular filtration;renal water transport;potassium ion transport;water transport;cell volume homeostasis;hyperosmotic response;cell communication;female pregnancy;excretion;visual perception;sensory perception of sound;response to radiation;response to water deprivation;response to hormone;cellular water homeostas…	1	InterPro_GO_Terms_1	go_process:GO:0055085 transmembrane transport
g43937	gill	Scaffold_1956	847762	862896	Adra	Marchamalo	-3.37294025982811	IPR016449 Potassium channel, inwardly rectifying, Kir;IPR041647 Inward rectifier potassium channel, C-terminal;IPR013518 Potassium channel, inwardly rectifying, Kir, cytoplasmic;IPR014756 Immunoglobulin E-set	Inward rectifier K(+) channel Kir7.1	potassium ion transport;regulation of ion transmembrane transport;potassium ion import across plasma membrane	1	InterPro_GO_Terms_3	go_process:GO:0006813 potassium ion transport
g45397	stomach	Scaffold_2019	778585	790978	Cabanes	Marchamalo	-4.89927218531453	IPR003663 Sugar/inositol transporter;IPR005828 Major facilitator, sugar transporter-like;IPR036259 MFS transporter superfamily;IPR005829 Sugar transporter, conserved site;IPR020846 Major facilitator superfamily domain	GLUT-6	regulation of glycolytic process;hexose transmembrane transport;fructose transmembrane transport;dehydroascorbic acid transport;glucose transmembrane transport	1	InterPro_GO_Terms_2	go_process:GO:0055085 transmembrane transport
g47581	gill	Scaffold_2093	113388	119705	Cabanes	Santa_Pola	7.24620597801563	IPR002110 Ankyrin repeat;IPR036770 Ankyrin repeat-containing domain superfamily;IPR020683 Ankyrin repeat-containing domain;IPR024862 Transient receptor potential cation channel subfamily V	NA	NA	1	InterPro_GO_Terms_3	go_process:GO:0006811 ion transport
g48606	stomach	Scaffold_2129	88105	96587	Adra	Marchamalo	7.92386727968407	IPR003045 P2X2 purinoceptor;IPR001429 P2X purinoreceptor;IPR027309 P2X purinoreceptor extracellular domain superfamily	ATP receptor	activation of MAPK activity;cell morphogenesis;response to hypoxia;positive regulation of cytokine production;phagolysosome assembly;tissue homeostasis;positive regulation of T cell mediated cytotoxicity;positive regulation of protein phosphorylation;regulation of sodium ion transport;serotonin secretion by platelet;response to ischemia;detection of hypoxic conditions in blood by carotid body che…	1	InterPro_GO_Terms_4	go_process:GO:0006811 ion transport
g50782	gill	Scaffold_2216	213992	240566	Cabanes	Santa_Pola	-6.36165335603553	IPR001429 P2X purinoreceptor;IPR003047 P2X4 purinoceptor;IPR027309 P2X purinoreceptor extracellular domain superfamily	ATP receptor	response to hypoxia;regulation of sodium ion transport;response to ischemia;detection of hypoxic conditions in blood by carotid body chemoreceptor signaling;nitric oxide biosynthetic process;ion transport;cation transport;calcium ion transport;signal transduction;chemical synaptic transmission;neuromuscular synaptic transmission;neuromuscular junction development;blood coagulation;sensory percept…	1	InterPro_GO_Terms_8	go_process:GO:0006811 ion transport
g53095	stomach	Scaffold_2304	1303817	1318580	Cabanes	Marchamalo	3.68208914048859	IPR002293 Amino acid/polyamine transporter I	L-type amino acid transporter 2	regulation of arginine metabolic process;positive regulation of cytokine production involved in immune response;amino acid transmembrane transport;glutathione metabolic process;amino acid transport;visual learning;response to toxic substance;negative regulation of gene expression;response to organic cyclic compound;neutral amino acid transport;L-amino acid transport;L-cystine transport;glycine tr…	1	InterPro_GO_Terms_2	go_process:GO:0055085 transmembrane transport
g53728	stomach	Scaffold_2330	426559	431235	Cabanes	Marchamalo	-2.57922706798275	IPR001902 SLC26A/SulP transporter;IPR002645 STAS domain;IPR011547 SLC26A/SulP transporter domain;IPR036513 STAS domain superfamily;IPR030331 Solute carrier family 26 member 1;IPR018045 Sulphate anion transporter, conserved site	Solute carrier family 26 member 2	ossification;ion transport;chloride transport;sulfate transport;oxalate transport;3'-phosphoadenosine 5'-phosphosulfate biosynthetic process;sulfate transmembrane transport	1	InterPro_GO_Terms_2	go_process:GO:0055085 transmembrane transport
g55707	gill	Scaffold_2391	1241237	1267071	Adra	Marchamalo	2.04292638071054	IPR002443 Solute carrier family 12 member 1/2;IPR018491 SLC12A transporter, C-terminal;IPR004842 SLC12A transporter family;IPR004841 Amino acid permease/ SLC12A domain;IPR002444 Solute carrier family 12 member 2	Bumetanide-sensitive sodium-(potassium)-chloride cotransporter 2	kidney development;ion transport;potassium ion transport;sodium ion transport;chloride transport;cellular sodium ion homeostasis;cell volume homeostasis;hyperosmotic response;gamma-aminobutyric acid signaling pathway;aging;excretion;T cell chemotaxis;ammonium transport;diterpenoid metabolic process;cellular potassium ion homeostasis;transepithelial chloride transport;cellular chloride ion homeost…	1	InterPro_GO_Terms_6	go_process:GO:0055085 transmembrane transport
g56794	stomach	Scaffold_2425	798385	822637	Cabanes	Marchamalo	4.79323879494705	IPR001970 Na+/H+ exchanger, isoform 1 (NHE1);IPR004709 Na+/H+ exchanger;IPR032103 Sodium/hydrogen exchanger, regulatory region;IPR006153 Cation/H+ exchanger;IPR018422 Cation/H+ exchanger, CPA1 family	Solute carrier family 9 member 1	reproduction;gastric acid secretion;regulation of the force of heart contraction;regulation of sodium ion transport;epithelial cell development;nematode larval development;ion transport;sodium ion transport;cellular sodium ion homeostasis;regulation of pH;receptor-mediated endocytosis;circadian rhythm;protein localization;determination of adult lifespan;response to salt stress;response to acidic …	1	InterPro_GO_Terms_5	go_process:GO:0055085 transmembrane transport
g60863	gill	Scaffold_2563	88018	96850	Cabanes	Marchamalo	2.47811683513914	IPR018410 Na+/H+ exchanger, isoforms 3/5;IPR018422 Cation/H+ exchanger, CPA1 family	Solute carrier family 9 member 5	ion transport;sodium ion transport;regulation of intracellular pH;potassium ion transmembrane transport;sodium ion import across plasma membrane;proton transmembrane transport	1	InterPro_GO_Terms_6	go_process:GO:0006812 cation transport
g65776	stomach	Scaffold_2745	418373	427832	Cabanes	Marchamalo	-2.52666495530801	IPR003593 AAA+ ATPase domain;IPR003439 ABC transporter-like;IPR036640 ABC transporter type 1, transmembrane domain superfamily;IPR011527 ABC transporter type 1, transmembrane domain;IPR017871 ABC transporter, conserved site;IPR027417 P-loop containing nucleoside triphosphate hydrolase	ATP-binding cassette sub-family D member 4	fatty acid beta-oxidation;peroxisome organization;cobalamin metabolic process;long-chain fatty acid import into peroxisome;very long-chain fatty acid catabolic process;transmembrane transport;cellular response to leukemia inhibitory factor	1	InterPro_GO_Terms_4	go_process:GO:0055085 transmembrane transport
g67868	stomach	Scaffold_2815	791594	881553	Cabanes	Marchamalo	-4.0131225317884	IPR026082 ABC transporter A	ATP-binding cassette sub-family A member 7	lipid transport;phagocytosis;memory;visual learning;positive regulation of cholesterol efflux;peptide cross-linking;regulation of lipid metabolic process;cholesterol efflux;phospholipid efflux;amyloid-beta formation;high-density lipoprotein particle assembly;protein localization to nucleus;apolipoprotein A-I-mediated signaling pathway;negative regulation of amyloid precursor protein biosynthetic …	1	InterPro_GO_Terms_3	go_process:GO:0055085 transmembrane transport
g67870	stomach	Scaffold_2815	889710	970649	Cabanes	Marchamalo	-3.62181095099782	IPR003593 AAA+ ATPase domain;IPR015095 Alkylated DNA repair protein AlkB, homologue 8, N-terminal;IPR003439 ABC transporter-like;IPR026082 ABC transporter A;IPR017871 ABC transporter, conserved site;IPR027417 P-loop containing nucleoside triphosphate hydrolase	ATP-binding cassette 2	retinoid metabolic process;peptide secretion;regulation of transcription by RNA polymerase II;protein lipidation;lipid metabolic process;phospholipid transfer to membrane;lipid transport;phagocytosis;phagocytosis, engulfment;lysosome organization;G protein-coupled receptor signaling pathway;adenylate cyclase-activating G protein-coupled receptor signaling pathway;response to nutrient;visual perce…	1	InterPro_GO_Terms_6	go_process:GO:0055085 transmembrane transport
g68887	stomach	Scaffold_2842	2020592	2055450	Cabanes	Marchamalo	2.37377874491018	IPR011701 Major facilitator superfamily;IPR036259 MFS transporter superfamily;IPR001806 Small GTPase;IPR005225 Small GTP-binding protein domain;IPR027378 Cyclic nucleotide-regulated ion channel, N-terminal;IPR020849 Small GTPase superfamily, Ras-type;IPR027417 P-loop containing nucleoside triphosphate hydrolase	Ras-like protein 1	reproduction;MAPK cascade;activation of MAPKKK activity;mitotic cytokinesis;positive regulation of transcription by galactose;conjugation with cellular fusion;pheromone-dependent signal transduction involved in conjugation with cellular fusion;cytogamy;neurotransmitter uptake;cell fate determination;mesodermal cell fate commitment;neural tube closure;liver development;regulation of exocyst assemb…	1	InterPro_GO_Terms_2	go_process:GO:0055085 transmembrane transport
g70603	stomach	Scaffold_2925	2531589	2546368	Cabanes	Marchamalo	7.70130229852403	IPR003593 AAA+ ATPase domain;IPR036640 ABC transporter type 1, transmembrane domain superfamily;IPR003439 ABC transporter-like;IPR011527 ABC transporter type 1, transmembrane domain;IPR039421 Type 1 protein exporter;IPR017871 ABC transporter, conserved site;IPR027417 P-loop containing nucleoside triphosphate hydrolase	ATP-dependent translocase ABCB1	G2/M transition of mitotic cell cycle;eye development;placenta development;fatty acid metabolic process;bile acid biosynthetic process;drug transmembrane transport;lactation;bile acid metabolic process;hormone transport;response to mycotoxin;response to ionizing radiation;establishment of endothelial blood-brain barrier;response to organic cyclic compound;bile acid and bile salt transport;canalic…	1	InterPro_GO_Terms_4	go_process:GO:0055085 transmembrane transport
g72814	gill	Scaffold_3021	1107597	1132178	Adra	Marchamalo	-2.96317156234954	IPR038377 Sodium/glucose symporter superfamily;IPR001734 Sodium/solute symporter	NA	NA	1	InterPro_GO_Terms_2	go_process:GO:0055085 transmembrane transport
g7532	stomach	Scaffold_314	2434172	2463120	Cabanes	Marchamalo	6.69609760631411	IPR006028 Gamma-aminobutyric acid A receptor/Glycine receptor alpha;IPR005437 Gamma-aminobutyric-acid A receptor, gamma subunit;IPR006029 Neurotransmitter-gated ion-channel transmembrane domain;IPR006201 Neurotransmitter-gated ion-channel;IPR036719 Neurotransmitter-gated ion-channel transmembrane domain superfamily	GABA(A) receptor subunit gamma-2	regulation of neurotransmitter levels;ion transport;chloride transport;neurotransmitter transport;signal transduction;gamma-aminobutyric acid signaling pathway;chemical synaptic transmission;central nervous system development;post-embryonic development;adult behavior;ion transmembrane transport;regulation of membrane potential;response to drug;regulation of circadian rhythm;nervous system process…	1	InterPro_GO_Terms_8	go_process:GO:0006811 ion transport
g7536	stomach	Scaffold_314	2488648	2514427	Cabanes	Marchamalo	10.3280020033585	IPR036734 Neurotransmitter-gated ion-channel ligand-binding domain superfamily;IPR006202 Neurotransmitter-gated ion-channel ligand-binding domain;IPR006201 Neurotransmitter-gated ion-channel;IPR018000 Neurotransmitter-gated ion-channel, conserved site	GABA(A) receptor subunit gamma-2	chloride transport;signal transduction;gamma-aminobutyric acid signaling pathway;chemical synaptic transmission;post-embryonic development;adult behavior;ion transmembrane transport;regulation of membrane potential;response to drug;nervous system process;synaptic transmission, GABAergic;regulation of postsynaptic membrane potential;cellular response to histamine;chloride transmembrane transport;i…	1	InterPro_GO_Terms_2	go_process:GO:0006811 ion transport
g9645	gill	Scaffold_407	1467214	1490016	Cabanes	Santa_Pola	3.40381408689297	IPR013525 ABC-2 type transporter;IPR003439 ABC transporter-like;IPR030256 ATP-binding cassette subfamily G member 2;IPR027417 P-loop containing nucleoside triphosphate hydrolase	ATP-binding cassette sub-family G member 2	cellular iron ion homeostasis;endocytosis;aging;response to symbiotic fungus;response to iron ion;urate transport;biotin transport;glucuronoside metabolic process;aggregation involved in sorocarp development;culmination involved in sorocarp development;sorocarp morphogenesis;riboflavin transport;response to lipopolysaccharide;response to insulin;response to morphine;urate metabolic process;endoso…	1	InterPro_GO_Terms_5	go_process:GO:0055085 transmembrane transport
