# Supplementary material
Source: Research Square preprint supplement (doi:10.21203/rs.3.rs-9115348/v1)
Supplement: Supplementary file 3 [file 3cffad6807772c8ec231f62b.xlsx]

## Sheet: Hoja1
Functional group	Gene name	Population upregulated	Tissue	Similar observation
Ion transporter	Na(+)/K(+) ATPase alpha-1 subunit (ATP1A1)	FW Adra	Gill	(Boutet et al. 2006; Whitehead et al. 2012; Norman et al. 2014; Maryoung et al. 2015; Gibbons et al. 2017; Guo et al. 2018; Lee et al. 2020; Lee et al. 2020; Vij et al. 2020; Li et al. 2021; Valenzuela-Muñoz et al. 2021; Taugbøl et al. 2022)
	Chloride channel protein 2	FW Adra	Gill	(Vij et al. 2020)
	Bumetanide-sensitive sodium-(potassium)-chloride cotransporter 2	FW Adra	Gill
		BW Santa Pola	Gill
		HS Marchamalo	Gill
	Solute carrier families	FW Adra	Gill	(Lam et al. 2014; Gibbons et al. 2017; Cui et al., 2019)
		BW Cabanes	Gill
		BW Santa Pola	Gill
		SW Marchamalo	Gill
	Neurotransmitter-gated ion-channel	BW Santa Pola	Gill
	Sodium channel protein type 4 subunit alpha B	SW Marchamalo	Gill
	Na(+)/K(+)/Ca(2+)-exchange protein 3	FW Adra	GIT
	Voltage-dependent L-type calcium channel subunit alpha-1C	BW Cabanes	GIT
		BW Santa Pola	GIT
	Claudin-3	SW Marchamalo	Gill	(Whitehead et al. 2012; Li et al. 2012; Lam et al. 2014; Nguyen et al. 2016)
Energetic metabolism	mannose-P-dolichol utilization defect 1	BW Cabanes	GIT?
		BW Santa Pola	Gills
	B30.2/SPRY domain superfamily	SW Marchamalo	GIT
	integrase zinc-binding domain	FW Adra	Gill
	HECT, E3 ligase catalytic domain	FW Adra	Gill
		BW Cabanes	Gill
		BW Santa Pola	GIT
		SW Marchamalo	GIT
	G protein-coupled receptor	FW Adra	Gill	(Lam et al., 2014; Nguyen et al., 2016; Zhang et al., 2017)
	NACHT-associated domain	FW Adra	Gill
	GPCR, family 2, secretin-like	FW Adra	Gill
	ankyrin repeat and SOCS box protein 5	FW Adra	Gill
		BW Cabanes	Gill
		BW Santa Pola	GIT
	zinc-binding domain	FW Adra	GIT
	calpain-5	FW Adra	GIT
	Brf1	FW Adra	GIT
	TBP-binding domain	FW Adra	GIT
	leucine-rich repeat and guanylate kinase domain-containing protein	FW Adra	GIT
	Protein kish-A	BW Cabanes	Gill
	Metallopeptidase	BW Cabanes	Gill
	Alkylated DNA repair protein AlkB	BW Cabanes	Gill
	DNA/RNA polymerase superfamily	BW Cabanes	Gill
	Piwi-like protein 2	BW Cabanes	GIT
	TATA box-binding protein-like 2	BW Cabanes	GIT
	DnaJ homolog subfamily B member 6	BW Cabanes	GIT
	Helically-extended SH3 domain	BW Cabanes	GIT
	Tristetraprolin (MAPK cascade)	BW Cabanes	GIT	(Lam et al., 2014; Nguyen et al., 2016; Zhang et al., 2017)
	Butyrophylin-like, SPRY domain	BW Cabanes	GIT
		SW Marchamalo	GIT
	B-box-type zinc finger	BW Cabanes	GIT
	Tudor domain	BW Cabanes	GIT
		BW Santa Pola	GIT
	P2X purinoreceptor (activation of MAPK activity)	BW Cabanes	GIT	(Lam et al., 2014; Nguyen et al., 2016; Zhang et al., 2017)
		BW Santa Pola	GIT
	dCMP deaminase	BW Santa Pola	Gill
	BGnT-7 (a Glycosyl transferase, family 31)	BW Santa Pola	Gill
	Probable ATP-dependent RNA helicase DDX43	BW Santa Pola	GIT	(Lam et al., 2014; Nguyen et al., 2016; Zhang et al., 2017)
	JP-2 (negative regulation of transcription by RNA polymerase II)	BW Santa Pola	GIT
	RNA recognition motif domain	BW Santa Pola	GIT
	Transglutaminase-like	BW Santa Pola	GIT
	F-box only protein 47	BW Santa Pola	GIT
	Prenylated rab acceptor PRA1	BW Santa Pola	GIT
	WWE domain	BW Santa Pola	GIT
	Cytochrome c	SW Marchamalo	Gill
	Endonuclease/exonuclease/phosphatase superfamily	SW Marchamalo	Gill
	Ribonuclease H-like superfamily	SW Marchamalo	Gill
	Sterile alpha motif domain	SW Marchamalo	GIT
	Integrase, catalytic core	SW Marchamalo	GIT
	MyHC-beta (DNA repair protein XRCC4-like)	SW Marchamalo	GIT
	GTPase IMAP family member 7	SW Marchamalo	GIT	(Lam et al., 2014; Nguyen et al., 2016; Zhang et al., 2017)
Immune Response	Butyrate response factor 1	BW Cabanes	Gill
		BW Santa Pola	Gill
	Chemokine interleukin-8-like domain	BW Cabanes	Gill
		BW Santa Pola	Gill
	apoptosis inhibitor-2 (c-IAP2)	BW Santa Pola	GIT
	junctophilin	BW Santa Pola	GIT
	MHC class II, beta chain, N-terminal	BW Santa Pola	Gill
	Interleukin family	BW Cabanes	Gill
		SW Marchamalo	Gill
		BW Santa Pola	Gill
		BW Cabanes	GIT
	Immunoglobulin C1-set	SW Marchamalo	Gill
		BW Cabanes	Gill
	Helically-extended SH3 domain	BW Cabanes	GIT
		BW Santa Pola	GIT
	Membrane attack complex component/perforin/complement	BW Cabanes	GIT
	Heat-shock 70 kDa protein 12A	FW Adra	GIT	(Thanh et al., 2014; Li et al., 2020; Zhang et al., 2020; Valenzuela-Muñoz et al., 2021)
		BW Santa Pola	Gill
Structure organization	KASH domain	BW Cabanes	Gill	(Li et al., 2012; Wong et al., 2014; Nguyen et al., 2016)
	helically-extended SH3 domain	BW Cabanes	Gill	(Li et al., 2012; Wong et al., 2014; Nguyen et al., 2016)
		BW Santa Pola	Gill
	Histones H1a and H4	FW Adra	Gill	(Whitehead et al., 2011; Whitehead et al., 2012)
		BW Cabanes	Gill
Repetitive Elements	Tc1 DNA transposon	FW Adra	Gill	(Caratti et al. 2022)
		SW Marchamalo	Gill
	L1 transposable element	BW Santa Pola	Gill	(Caratti et al. 2022)
	PiggyBac transposable element-derived protein	BW Cabanes	GIT
	Barney transposase	SW Marchamalo	GIT
