# Supplementary material
Source: Research Square preprint supplement (doi:10.21203/rs.3.rs-9115348/v1)
Supplement: Supplementary file 4 [file 6a860389996935040ff7e379.xlsx]

## Sheet: Hoja 1 - annotated_MarchSPol_st
annotated_MarchSPol_stomach
	gene_id	logFC	logCPM	PValue	FDR	AT30482_2	AT30483_2	AT30484_2	AT30485_2	AT30487_2	AT30488_2	AT30489_2	AT30490_2	AT30493_2	AT30494_2	AT30495_2	AT30496_2	AT30503_2	AT30504_2	AT30505_2	AT30506_2	Scaffold_ID	Start	End	gene_name	InterPro_Annot	InterPro_GO_Terms	sma3s_name	sma3s_Annot	Full_name_Salinity	Function_Salinity
1.March_g64617	g64617	11.6812321206879	2.75645747185115	4.49539110206152e-07	0.000273038817061462	8	9	20	14	0	0	0	0	8	325	1078	31	0	0	411	9	Scaffold_2694	118270	122811	NA	IPR013106 Immunoglobulin V-set domain;IPR003599 Immunoglobulin subtype;IPR013783 Immunoglobulin-like fold;IPR007110 Immunoglobulin-like domain;IPR036179 Immunoglobulin-like domain superfamily	-	NA	NA	NA	NA
2.March_g53003	g53003	10.831801484711	1.91859049042623	1.64477848218818e-18	1.59839572899048e-14	10	0	0	0	0	0	0	0	108	159	205	316	0	0	7	0	Scaffold_2301	29817	37594	NA	IPR006703 AIG1-type guanine nucleotide-binding (G) domain;IPR027417 P-loop containing nucleoside triphosphate hydrolase	go_function:GO:0005525 GTP binding	NA	NA	NA	NA
3.March_g57686	g57686	10.7654576288066	3.24065433452031	5.53547689426862e-25	1.07587528917005e-20	0	2	0	11	0	1	0	0	239	580	647	453	0	3	3	0	Scaffold_2455	1382139	1383356	NA	IPR029526 PiggyBac transposable element-derived protein	-	NA	NA	NA	NA
4.March_g46986	g46986	10.2892537153186	1.38773445418859	4.56251187339513e-10	1.26681401101868e-06	0	0	4	6	0	0	0	0	40	264	95	97	0	0	0	0	Scaffold_2072	385670	391498	NA	IPR029526 PiggyBac transposable element-derived protein	-	NA	NA	NA	NA
5.March_g41066	g41066	9.89230942206222	1.00696023461725	5.68594659550062e-08	6.13955877945278e-05	0	0	0	0	0	0	0	0	9	36	214	191	0	2	158	0	Scaffold_1873	348749	350608	NA	IPR044822 Myb/SANT-like DNA-binding domain 4	-	NA	NA	NA	NA
6.March_g37153	g37153	9.46870419148401	0.59709205995726	9.424007933482e-12	4.5791254548789e-08	25	11	9	0	0	0	0	0	57	49	84	112	7	0	272	0	Scaffold_1682	145280	165435	NA	IPR006703 AIG1-type guanine nucleotide-binding (G) domain;IPR027417 P-loop containing nucleoside triphosphate hydrolase	go_function:GO:0005525 GTP binding	NA	NA	NA	NA
7.March_g45419	g45419	8.1252291179278	-0.653083458238492	2.97602902848975e-08	3.85614001318178e-05	19	3	0	0	0	0	0	0	29	29	29	24	0	0	0	14	Scaffold_2021	26874	34104	NA	IPR003599 Immunoglobulin subtype;IPR016137 RGS domain;IPR013783 Immunoglobulin-like fold;IPR024066 RGS, subdomain 1/3;IPR007110 Immunoglobulin-like domain;IPR036179 Immunoglobulin-like domain superfamily;IPR036305 RGS domain superfamily	-	NA	NA	NA	NA
8.March_g22758	g22758	7.89072561942401	-0.859410235622932	2.70584399868316e-06	0.000906737654455276	0	0	0	3	0	0	0	0	8	37	12	43	0	0	0	0	Scaffold_1003	4003965	4007204	NA	IPR015095 Alkylated DNA repair protein AlkB, homologue 8, N-terminal	go_function:GO:0016706 2-oxoglutarate-dependent dioxygenase activity;go_function:GO:0008168 methyltransferase activity	NA	NA	NA	NA
9.March_g36796	g36796	7.63121740724542	-1.08812410004308	1.51771402640948e-06	0.000653305717175055	0	0	0	0	0	0	0	0	10	31	24	15	0	0	6	0	Scaffold_1665	752583	755019	NA	IPR029526 PiggyBac transposable element-derived protein	-	NA	NA	NA	NA
10.March_g69711	g69711	5.9764586356334	0.531166382091532	7.51235710133728e-09	1.32736520565083e-05	8	19	3	53	4	2	0	0	35	88	63	93	4	0	6	4	Scaffold_2890	753163	757058	NA	IPR006120 Resolvase, HTH domain;IPR012337 Ribonuclease H-like superfamily	go_function:GO:0003677 DNA binding;go_process:GO:0006310 DNA recombination;go_function:GO:0000150 DNA strand exchange activity	NA	NA	NA	NA
11.March_g5437	g5437	5.88221568919312	0.0196168250548902	4.23451585490387e-07	0.000265490484373908	8	14	3	37	4	0	0	0	26	53	37	78	0	0	4	4	Scaffold_231	2972294	2975131	NA	IPR036397 Ribonuclease H superfamily;IPR012337 Ribonuclease H-like superfamily	go_function:GO:0003676 nucleic acid binding	NA	NA	NA	NA
12.March_g51042	g51042	5.88221568919312	0.0196168250548902	4.23451585490387e-07	0.000265490484373908	8	14	3	37	4	0	0	0	26	53	37	78	0	0	4	4	Scaffold_2228	1332570	1335407	NA	IPR036397 Ribonuclease H superfamily;IPR012337 Ribonuclease H-like superfamily	go_function:GO:0003676 nucleic acid binding	NA	NA	NA	NA
13.March_g58975	g58975	5.40785501505747	-0.702348547771089	3.8362041048343e-07	0.000265490484373908	3	1	15	7	1	1	0	1	21	26	20	43	2	7	9	1	Scaffold_2513	815479	818496	NA	IPR000477 Reverse transcriptase domain;IPR015095 Alkylated DNA repair protein AlkB, homologue 8, N-terminal;IPR036691 Endonuclease/exonuclease/phosphatase superfamily;IPR043502 DNA/RNA polymerase superfamily	go_function:GO:0016706 2-oxoglutarate-dependent dioxygenase activity;go_function:GO:0008168 methyltransferase activity	NA	NA	NA	NA
14.March_g33149	g33149	5.38844798408567	1.16673451247421	3.46308900747335e-08	4.20678737182825e-05	0	3	0	0	0	10	0	5	122	76	78	151	0	172	4	411	Scaffold_1473	4211282	4216245	NA	IPR000436 Sushi/SCR/CCP domain;IPR035976 Sushi/SCR/CCP superfamily	-	NA	NA	NA	NA
15.March_g27269_STAT1	g27269	5.37451951803524	-0.184620134860911	2.48044162863666e-06	0.00089323015634756	4	4	0	0	0	6	0	0	16	39	53	62	0	8	18	0	Scaffold_1227	416851	419445	STAT1	IPR036860 SH2 domain superfamily;IPR000980 SH2 domain;IPR001217 Transcription factor STAT	go_process:GO:0006355 regulation of transcription, DNA-templated;go_process:GO:0007165 signal transduction;go_function:GO:0003700 DNA-binding transcription factor activity	Signal transducer and activator of transcription 1	negative regulation of transcription by RNA polymerase II;regulation of protein phosphorylation;negative regulation of endothelial cell proliferation;positive regulation of mesenchymal cell proliferation;positive regulation of defense response to virus by host;negative regulation of mesenchymal to epithelial transition involved in metanephros morphogenesis;activation of cysteine-type endopeptidas…	NA	NA
16.March_g51153	g51153	5.12337897336102	4.01666262105097	4.20590878520022e-12	2.72486810497171e-08	22	13	7	16	22	48	4	48	328	1120	1212	508	73	115	267	56	Scaffold_2236	70441	87732	NA	IPR011115 SecA DEAD-like, N-terminal;IPR000185 Protein translocase subunit SecA;IPR014018 SecA motor DEAD;IPR027417 P-loop containing nucleoside triphosphate hydrolase	go_process:GO:0017038 protein import;go_function:GO:0005524 ATP binding;go_component:GO:0016020 membrane;go_process:GO:0006886 intracellular protein transport;go_process:GO:0006605 protein targeting	NA	NA	NA	NA
1.SPol_g42550	g42550	-12.618761836288	3.68788899913907	6.55584916826859e-08	6.7062886544457e-05	3261	2367	55	123	838	5004	16	22	0	0	0	0	151	0	19	2721	Scaffold_1906	3463716	3473833	NA	IPR029294 Helically-extended SH3 domain;IPR043443 FYN-binding protein 1/2-like;IPR030635 FYN-binding protein 1;IPR036028 SH3-like domain superfamily	go_process:GO:0007229 integrin-mediated signaling pathway;go_component:GO:0005886 plasma membrane;go_component:GO:0015629 actin cytoskeleton;go_process:GO:0006955 immune response;go_function:GO:0005515 protein binding	NA	NA	NA	NA
2.SPol_g10014	g10014	-12.3226634067727	5.23652494928108	5.5306055979104e-10	1.34366063001233e-06	6833	6869	65	98	1996	10329	613	29	1	0	0	0	1579	0	0	7352	Scaffold_425	222141	248064	NA	IPR002999 Tudor domain;IPR035437 SNase-like, OB-fold superfamily	-	NA	NA	NA	NA
3.SPol_g57072_P2X1	g57072	-12.198500237607	3.27132922046347	4.09279495587589e-07	0.000265490484373908	1801	1554	25	23	874	3461	6	15	0	0	0	0	26	0	0	1009	Scaffold_2432	1224570	1237197	P2X1	IPR001429 P2X purinoreceptor;IPR027309 P2X purinoreceptor extracellular domain superfamily;IPR003048 P2X5 purinoceptor	go_process:GO:0033198 response to ATP;go_function:GO:0004931 extracellularly ATP-gated cation channel activity;go_function:GO:0001614 purinergic nucleotide receptor activity;go_component:GO:0005887 integral component of plasma membrane;go_process:GO:0098655 cation transmembrane transport;go_function:GO:0005216 ion channel activity;go_component:GO:0016020 membrane;go_process:GO:0006811 ion transpo…	ATP receptor	activation of MAPK activity;cell morphogenesis;response to hypoxia;positive regulation of cytokine production;phagolysosome assembly;tissue homeostasis;positive regulation of T cell mediated cytotoxicity;positive regulation of protein phosphorylation;regulation of sodium ion transport;serotonin secretion by platelet;response to ischemia;detection of hypoxic conditions in blood by carotid body che…	NA	NA
4.SPol_g17931_DDX43	g17931	-11.7460071249254	2.81964308442874	1.21076993445701e-07	0.000117662622230532	1481	1534	35	37	272	2523	61	6	0	0	0	0	860	0	0	1587	Scaffold_727	3170832	3197088	DDX43	IPR004087 K Homology domain;IPR014001 Helicase superfamily 1/2, ATP-binding domain;IPR011545 DEAD/DEAH box helicase domain;IPR036612 K Homology domain, type 1 superfamily;IPR004088 K Homology domain, type 1;IPR000629 ATP-dependent RNA helicase DEAD-box, conserved site;IPR014014 RNA helicase, DEAD-box type, Q motif;IPR001650 Helicase, C-terminal;IPR027417 P-loop containing nucleoside triphosphate …	go_function:GO:0003676 nucleic acid binding;go_function:GO:0005524 ATP binding;go_function:GO:0003723 RNA binding;go_function:GO:0003724 RNA helicase activity	Probable ATP-dependent RNA helicase DDX43	regulation of defense response to virus;negative regulation of extrinsic apoptotic signaling pathway via death domain receptors;negative regulation of NIK/NF-kappaB signaling;positive regulation of interferon-alpha production;Wnt signaling pathway;alternative mRNA splicing, via spliceosome;positive regulation of G1/S transition of mitotic cell cycle;spermatogenesis;positive regulation of formatio…	Probable ATP-dependent RNA helicase DDX43	cellular response to osmotic stress
5.SPol_g49794_JP1	g49794	-11.0446363403918	2.13305444267677	1.31203176698114e-06	0.000593038358675475	458	44	0	0	114	1862	8	15	0	0	0	0	0	0	15	185	Scaffold_2184	33054	55226	JP1	IPR003409 MORN motif;IPR017191 Junctophilin	go_component:GO:0030314 junctional membrane complex	JP-2	negative regulation of transcription by RNA polymerase II;regulation of cytokine production;positive regulation of cytosolic calcium ion concentration;multicellular organism development;muscle organ development;learning;memory;exploration behavior;locomotion;negative regulation of transcription, DNA-templated;regulation of synaptic plasticity;regulation of neuronal synaptic plasticity;neuromuscul…	NA	NA
6.SPol_g33182	g33182	-10.9520009275979	2.04258824896931	6.91004272963513e-07	0.000373065529147746	1428	1689	0	130	487	1263	2	23	0	0	0	0	0	0	0	1130	Scaffold_1473	4769508	4777148	NA	IPR016817 Mannose-P-dolichol utilization defect 1 protein	-	NA	NA	NA	NA
7.SPol_g17107_BAI1	g17107	-10.6845998423988	1.78107359844136	1.54620616330791e-06	0.000653305717175055	409	1293	13	7	191	1324	5	11	0	0	0	0	25	0	11	800	Scaffold_710	3496077	3569399	BAI1	IPR008077 GPCR, family 2, brain-specific angiogenesis inhibitor;IPR000832 GPCR, family 2, secretin-like;IPR017981 GPCR, family 2-like	go_process:GO:0016525 negative regulation of angiogenesis;go_component:GO:0016020 membrane;go_component:GO:0016021 integral component of membrane;go_process:GO:0007186 G protein-coupled receptor signaling pathway;go_function:GO:0004930 G protein-coupled receptor activity;go_function:GO:0004888 transmembrane signaling receptor activity;go_process:GO:0007166 cell surface receptor signaling pathway	Adhesion G protein-coupled receptor B1	phagocytosis, recognition;phagocytosis, engulfment;cell surface receptor signaling pathway;G protein-coupled receptor signaling pathway;adenylate cyclase-activating G protein-coupled receptor signaling pathway;nervous system development;axonogenesis;peripheral nervous system development;muscle organ development;myoblast fusion;negative regulation of cell population proliferation;negative regulati…	NA	NA
8.SPol_g40753	g40753	-10.2986980886726	3.05977879589279	9.56783101913746e-07	0.000464900909219889	1528	2058	60	40	554	3150	18	7	0	0	0	1	217	0	1	1438	Scaffold_1865	323587	368747	NA	IPR000504 RNA recognition motif domain;IPR012677 Nucleotide-binding alpha-beta plait domain superfamily;IPR035979 RNA-binding domain superfamily	go_function:GO:0003676 nucleic acid binding	NA	NA	NA	NA
9.SPol_g58803	g58803	-10.0251713554665	1.12147709265052	2.05796820872637e-07	0.000159994680419223	0	0	0	0	74	628	33	10	0	0	0	0	240	0	0	387	Scaffold_2510	38889	50611	NA	IPR002931 Transglutaminase-like;IPR008958 Transglutaminase, C-terminal;IPR036985 Transglutaminase-like superfamily;IPR013783 Immunoglobulin-like fold;IPR023608 Protein-glutamine gamma-glutamyltransferase, animal;IPR001102 Transglutaminase, N-terminal;IPR034810 Coagulation factor XIII A chain;IPR036238 Transglutaminase, C-terminal domain superfamily;IPR038765 Papain-like cysteine peptidase superfa…	go_function:GO:0003810 protein-glutamine gamma-glutamyltransferase activity;go_process:GO:0018149 peptide cross-linking;go_process:GO:0072378 blood coagulation, fibrin clot formation	NA	NA	NA	NA
10.SPol_g68740	g68740	-9.99800417440424	1.10737412807609	1.14050507246645e-08	1.66033776347047e-05	271	514	0	0	159	652	9	34	0	0	0	0	152	0	0	162	Scaffold_2841	1649785	1665651	NA	IPR002110 Ankyrin repeat;IPR036770 Ankyrin repeat-containing domain superfamily;IPR020683 Ankyrin repeat-containing domain	go_function:GO:0005515 protein binding	NA	NA	NA	NA
11.SPol_g23106_cac	g23106	-9.93610842033067	1.04351888160576	2.5276630273264e-06	0.00089323015634756	0	0	4	0	246	8	9	258	0	0	0	0	58	0	0	20	Scaffold_1024	485460	503095	cac	IPR014873 Voltage-dependent calcium channel, alpha-1 subunit, IQ domain;IPR005821 Ion transport domain;IPR031688 Voltage-gated calcium channel subunit alpha, C-terminal;IPR031649 Voltage-dependent L-type calcium channel, IQ-associated domain;IPR027359 Voltage-dependent channel domain superfamily	go_function:GO:0005216 ion channel activity;go_process:GO:0055085 transmembrane transport;go_component:GO:0016020 membrane;go_process:GO:0006811 ion transport	Voltage-dependent L-type calcium channel subunit alpha-1C	skeletal system development;regulation of neurotransmitter levels;behavioral fear response;positive regulation of neurotransmitter secretion;regulation of heart rate;extraocular skeletal muscle development;immune system development;calcium ion transport;cellular calcium ion homeostasis;muscle contraction;smooth muscle contraction;striated muscle contraction;endoplasmic reticulum organization;aden…	NA	NA
12.SPol_g68738	g68738	-9.72480030829171	0.833404698900599	1.11770681828672e-09	2.41374996891341e-06	268	280	0	0	149	412	20	25	0	0	0	0	124	0	0	105	Scaffold_2841	1617807	1634360	NA	IPR002110 Ankyrin repeat;IPR036770 Ankyrin repeat-containing domain superfamily;IPR020683 Ankyrin repeat-containing domain	go_function:GO:0005515 protein binding	NA	NA	NA	NA
13.SPol_g42904	g42904	-9.44706243869892	0.576802584559131	5.09738113921411e-07	0.000300220302490198	433	119	28	10	47	500	10	20	0	0	0	0	14	44	168	126	Scaffold_1909	4936	8697	NA	IPR043129 ATPase, nucleotide binding domain	-	NA	NA	NA	NA
14.SPol_g17652	g17652	-9.42731990067575	0.563743554921172	3.51948790911713e-07	0.000253350988894817	273	407	24	6	179	369	4	18	0	0	0	0	197	0	0	252	Scaffold_721	27889	32708	NA	IPR025715 Chromatin target of PRMT1 protein, C-terminal	-	NA	NA	NA	NA
15.SPol_g15161_FBXO47	g15161	-9.22479568806806	0.363086578098421	2.52324900142609e-06	0.00089323015634756	58	244	7	0	59	404	11	7	0	0	0	0	204	0	7	109	Scaffold_644	5710	32879	FBXO47	IPR003653 Ulp1 protease family, C-terminal catalytic domain;IPR038946 F-box only protein 47;IPR038765 Papain-like cysteine peptidase superfamily	go_process:GO:0006508 proteolysis;go_function:GO:0008234 cysteine-type peptidase activity	F-box only protein 47	NA	NA	NA
16.SPol_g62210	g62210	-8.73571980336821	-0.112813434833227	3.30959074890063e-07	0.00024740463767551	121	293	24	4	74	191	13	9	0	0	0	0	0	1	0	119	Scaffold_2609	1170669	1186428	NA	IPR004895 Prenylated rab acceptor PRA1	-	NA	NA	NA	NA
17.SPol_g21694	g21694	-8.66598547381502	-0.194193349058386	4.55162399197834e-08	5.20384493577006e-05	10	13	15	0	72	32	17	60	0	0	0	0	140	0	0	16	Scaffold_941	361457	365598	NA	IPR004170 WWE domain;IPR012317 Poly(ADP-ribose) polymerase, catalytic domain;IPR037197 WWE domain superfamily;IPR000571 Zinc finger, CCCH-type	go_function:GO:0003950 NAD+ ADP-ribosyltransferase activity;go_function:GO:0046872 metal ion binding	NA	NA	NA	NA
18.SPol_g61150	g61150	-8.43958776185003	-0.383779546510358	1.71814509955049e-07	0.000139141117311931	13	35	34	31	68	35	6	76	0	0	0	0	0	1	0	0	Scaffold_2572	616246	617205	NA	IPR043636 L1 transposable element, RRM domain;IPR004244 Transposase, L1	-	NA	NA	NA	NA
19.SPol_g63357_CCDC46	g63357	-8.41598767271645	-0.433458641717128	8.62163863820868e-07	0.000430193400454905	81	108	0	0	30	128	17	12	0	0	0	0	31	0	0	95	Scaffold_2650	235733	271148	CCDC46	IPR036388 Winged helix-like DNA-binding domain superfamily;IPR027831 Domain of unknown function DUF4485	-	Centrosomal protein of 112 kDa	receptor localization to synapse	NA	NA
20.SPol_g46238	g46238	-8.26457437421701	-0.543234224377184	8.63219932997598e-07	0.000430193400454905	14	44	44	35	52	28	5	75	0	0	0	0	0	1	0	0	Scaffold_2052	924648	925652	NA	IPR043636 L1 transposable element, RRM domain;IPR004244 Transposase, L1	-	NA	NA	NA	NA

## Sheet: Hoja 1 - annotated_AdraSPol_sto
annotated_AdraSPol_stomach
	gene_id	logFC	logCPM	PValue	FDR	AT30482_2	AT30483_2	AT30484_2	AT30485_2	AT30487_2	AT30488_2	AT30489_2	AT30490_2	AT30493_2	AT30494_2	AT30495_2	AT30496_2	AT30503_2	AT30504_2	AT30505_2	AT30506_2	Scaffold_ID	Start	End	gene_name	InterPro_Annot	InterPro_GO_Terms	sma3s_name	sma3s_Annot	Full_name_Salinity	Function_Salinity
1.SPol_g14360	g14360	-6.81673391901082	2.00618938676376	8.68057287200371e-09	0.000176536810497939	82	709	153	191	336	490	51	165	234	342	266	398	4	0	0	4	Scaffold_625	2344466	2348305	NA	IPR033214 A-kinase-interacting protein 1	go_process:GO:1901222 regulation of NIK/NF-kappaB signaling	NA	NA	NA	NA

## Sheet: Hoja 1 - annotated_CabSPol_stom
annotated_CabSPol_stomach
	gene_id	logFC	logCPM	PValue	FDR	AT30482_2	AT30483_2	AT30484_2	AT30485_2	AT30487_2	AT30488_2	AT30489_2	AT30490_2	AT30493_2	AT30494_2	AT30495_2	AT30496_2	AT30503_2	AT30504_2	AT30505_2	AT30506_2	Scaffold_ID	Start	End	gene_name	InterPro_Annot	InterPro_GO_Terms	sma3s_name	sma3s_Annot	Full_name_Salinity	Function_Salinity
1.SPol_g38306_NAGA	g38306	-12.2822103698786	3.16561342164826	4.60695922281973e-09	2.98454174985005e-05	0	0	0	0	132	132	357	360	951	0	0	620	366	439	611	148	Scaffold_1751	1989016	1995106	NAGA	IPR002241 Glycoside hydrolase, family 27;IPR013785 Aldolase-type TIM barrel;IPR017853 Glycoside hydrolase superfamily	go_process:GO:0005975 carbohydrate metabolic process;go_function:GO:0004553 hydrolase activity, hydrolyzing O-glycosyl compounds;go_function:GO:0003824 catalytic activity	Alpha-galactosidase B	oligosaccharide metabolic process;carbohydrate catabolic process;glycoside catabolic process;glycolipid catabolic process;glycosylceramide catabolic process	NA	NA
2.SPol_g55212	g55212	-8.76258403488006	-0.269849239655023	3.09370709488067e-08	0.000150315493472515	0	0	0	0	56	118	13	32	27	0	39	40	0	0	50	0	Scaffold_2370	996427	1005739	NA	IPR038717 Tc1-like transposase, DDE domain;IPR036397 Ribonuclease H superfamily	go_function:GO:0003676 nucleic acid binding	NA	NA	NA	NA
3.SPol_g13176_H1F1	g13176	-5.33106225235346	3.40730771410318	1.32638631828259e-12	2.57783180958221e-08	32	12	6	14	935	1696	104	509	408	386	284	1099	455	293	792	10	Scaffold_570	265148	265690	H1F1	IPR005819 Linker histone H1/H5;IPR005818 Linker histone H1/H5, domain H15;IPR036388 Winged helix-like DNA-binding domain superfamily;IPR036390 Winged helix DNA-binding domain superfamily	go_function:GO:0003677 DNA binding;go_component:GO:0000786 nucleosome;go_process:GO:0006334 nucleosome assembly	Histone H1a	negative regulation of transcription by RNA polymerase II;chromatin organization;nucleosome assembly;regulation of transcription, DNA-templated;regulation of transcription by RNA polymerase II;multicellular organism development;spermatogenesis;binding of sperm to zona pellucida;muscle organ development;nucleosome positioning;cell differentiation;chromosome condensation;positive regulation of cell…	NA	NA

## Sheet: Hoja 1 - annotated_CabMarch_sto
annotated_CabMarch_stomach
	gene_id	logFC	logCPM	PValue	FDR	AT30482_2	AT30483_2	AT30484_2	AT30485_2	AT30487_2	AT30488_2	AT30489_2	AT30490_2	AT30493_2	AT30494_2	AT30495_2	AT30496_2	AT30503_2	AT30504_2	AT30505_2	AT30506_2	Scaffold_ID	Start	End	gene_name	InterPro_Annot	InterPro_GO_Terms	sma3s_name	sma3s_Annot	Full_name_Salinity	Function_Salinity
1.Cab_g31856_six	g31856	13.4876120785581	4.47083067717086	5.6115309624072e-10	4.75369866398009e-07	5016	4352	52	75	1375	4407	10	0	0	0	0	0	0	0	0	2629	Scaffold_1412	3421532	3425065	six	IPR001370 BIR repeat	-	Apoptosis inhibitor survivin	G2/M transition of mitotic cell cycle;microtubule cytoskeleton organization;mitotic cell cycle;mitotic cytokinesis;vasculature development;protein phosphorylation;chromosome segregation;mitotic spindle assembly checkpoint;regulation of mitotic cell cycle;sensory perception of sound;cytokine-mediated signaling pathway;protein-containing complex localization;positive regulation of exit from mitosis…	NA	NA
2.Cab_g36027_zili	g36027	13.3788389547968	4.36253373257954	4.97563336671427e-09	2.20330092084229e-06	4286	4627	36	46	1252	5137	27	0	0	0	0	0	263	0	9	4909	Scaffold_1640	477663	486637	zili	IPR003100 PAZ domain;IPR036085 PAZ domain superfamily	go_function:GO:0005515 protein binding	Piwi-like protein 2	RNA 5'-end processing;regulation of translation;multicellular organism development;gamete generation;spermatogenesis;negative regulation of transposition;positive regulation of gene expression;negative regulation of SMAD protein complex assembly;cell differentiation;germ-line stem cell population maintenance;gene silencing by RNA;piRNA metabolic process;negative regulation of circadian rhythm;DNA…	NA	NA
3.Cab_g36922_tbpl2	g36922	12.9669594641128	3.95245275078217	1.48758829454206e-08	4.89358084228693e-06	3251	3399	14	61	509	1004	0	0	0	0	0	0	0	0	0	3147	Scaffold_1674	54301	73392	tbpl2	IPR000814 TATA-box binding protein;IPR012295 TBP domain superfamily;IPR030491 TATA-box binding protein, conserved site;IPR033710 TATA-box binding protein, eukaryotic	go_function:GO:0003677 DNA binding;go_process:GO:0006352 DNA-templated transcription, initiation	TATA box-binding protein-like 2	embryo development ending in birth or egg hatching;multicellular organism development;transcription initiation from RNA polymerase III promoter;regulation of signal transduction by p53 class mediator;termination of RNA polymerase I transcription;hemopoiesis;spermatogenesis;RNA polymerase III preinitiation complex assembly;positive regulation of gene expression, epigenetic;RNA polymerase I preinit…	NA	NA
4.Cab_g66486_dnaJ	g66486	12.9197857639231	3.90545666277971	2.44118068211476e-09	1.4413322548583e-06	2844	3625	25	65	389	3689	0	26	0	0	0	0	17	0	7	3435	Scaffold_2768	731223	740883	dnaJ	IPR001623 DnaJ domain;IPR002939 Chaperone DnaJ, C-terminal;IPR036869 Chaperone J-domain superfamily;IPR018253 DnaJ domain, conserved site;IPR008971 HSP40/DnaJ peptide-binding	go_process:GO:0006457 protein folding;go_function:GO:0051082 unfolded protein binding	DnaJ homolog subfamily B member 6	negative regulation of transcription by RNA polymerase II;protein folding;response to unfolded protein;negative regulation of cell population proliferation;response to heat;actin cytoskeleton organization;extracellular matrix organization;negative regulation of cell growth;ubiquitin-dependent ERAD pathway;forebrain development;regulation of protein ubiquitination;positive regulation of protein ub…	NA	NA
5.Cab_g36024_zili	g36024	12.8698097279792	3.85565527669197	8.42089726092114e-10	6.5629104892715e-07	3107	2993	36	63	787	2728	27	0	0	0	0	0	244	0	0	2597	Scaffold_1640	438716	451311	zili	IPR003165 Piwi domain;IPR036397 Ribonuclease H superfamily;IPR012337 Ribonuclease H-like superfamily	go_function:GO:0003676 nucleic acid binding	Piwi-like protein 2	RNA 5'-end processing;regulation of translation;multicellular organism development;gamete generation;spermatogenesis;negative regulation of transposition;positive regulation of gene expression;negative regulation of SMAD protein complex assembly;cell differentiation;germ-line stem cell population maintenance;gene silencing by RNA;piRNA metabolic process;negative regulation of circadian rhythm;DNA…	NA	NA
6.Cab_g42550	g42550	12.8357661180738	3.82151785961719	1.21694368546739e-11	1.97591089730388e-08	3261	2367	55	123	838	5004	16	22	0	0	0	0	151	0	19	2721	Scaffold_1906	3463716	3473833	NA	IPR029294 Helically-extended SH3 domain;IPR043443 FYN-binding protein 1/2-like;IPR030635 FYN-binding protein 1;IPR036028 SH3-like domain superfamily	go_process:GO:0007229 integrin-mediated signaling pathway;go_component:GO:0005886 plasma membrane;go_component:GO:0015629 actin cytoskeleton;go_process:GO:0006955 immune response;go_function:GO:0005515 protein binding	NA	NA	NA	NA
7.Cab_g62644_BRF1	g62644	12.6527857401097	3.63995772978655	4.75387431297696e-09	2.20330092084229e-06	2579	2754	33	34	1172	10008	0	0	0	0	0	0	4	0	0	4128	Scaffold_2621	1360045	1361537	BRF1	IPR000571 Zinc finger, CCCH-type;IPR036855 Zinc finger, CCCH-type superfamily	go_function:GO:0046872 metal ion binding	Tristetraprolin	negative regulation of transcription by RNA polymerase II;MAPK cascade;nuclear-transcribed mRNA catabolic process, deadenylation-dependent decay;nuclear-transcribed mRNA poly(A) tail shortening;vasculogenesis;proepicardium development;mRNA processing;mRNA catabolic process;regulation of translation;apoptotic process;multicellular organism development;heart development;cell population proliferatio…	Butyrate response factor 1	cellular response to salt stress
8.Cab_g71464	g71464	12.6167295629605	3.60409450929679	2.90353933501662e-09	1.57146001120733e-06	2466	2726	31	42	757	2963	7	0	0	0	0	0	8	0	0	1949	Scaffold_2964	944625	949917	NA	IPR003879 Butyrophylin-like, SPRY domain;IPR006574 SPRY-associated;IPR003877 SPRY domain;IPR043136 B30.2/SPRY domain superfamily;IPR001870 B30.2/SPRY domain;IPR013320 Concanavalin A-like lectin/glucanase domain superfamily	go_function:GO:0005515 protein binding	NA	NA	NA	NA
9.Cab_g71463	g71463	12.4545402498434	3.44295749286936	4.67719174372658e-09	2.20330092084229e-06	2452	2113	32	33	717	4145	0	0	0	0	0	0	45	0	3	2010	Scaffold_2964	938265	944269	NA	IPR000315 B-box-type zinc finger;IPR001841 Zinc finger, RING-type;IPR013083 Zinc finger, RING/FYVE/PHD-type;IPR017907 Zinc finger, RING-type, conserved site	go_function:GO:0008270 zinc ion binding	NA	NA	NA	NA
10.Cab_g52077	g52077	12.2634662746492	3.25358739558121	2.43001619965759e-07	4.32469072712168e-05	2118	1959	29	6	68	967	0	0	0	0	0	0	0	0	0	985	Scaffold_2267	1042014	1050940	NA	IPR029526 PiggyBac transposable element-derived protein	-	NA	NA	NA	NA
11.Cab_g10014	g10014	12.1392338348883	4.99818646686497	5.59207396839364e-09	2.36860802609091e-06	6833	6869	65	98	1996	10329	613	29	1	0	0	0	1579	0	0	7352	Scaffold_425	222141	248064	NA	IPR002999 Tudor domain;IPR035437 SNase-like, OB-fold superfamily	-	NA	NA	NA	NA
12.Cab_g46212_ARVP	g46212	12.0760870322979	3.06775585056724	7.88306132593336e-08	2.0209679851906e-05	1831	1749	16	18	0	5	0	6	0	0	0	0	0	0	0	1577	Scaffold_2052	502952	505447	ARVP	IPR000981 Neurohypophysial hormone;IPR036387 Neurohypophysial hormone domain superfamily;IPR022423 Neurohypophysial hormone, conserved site	go_function:GO:0005185 neurohypophyseal hormone activity;go_component:GO:0005576 extracellular region	Neurophysin 2	temperature homeostasis;response to amphetamine;regulation of heart rate;maternal aggressive behavior;positive regulation of systemic arterial blood pressure;renal water homeostasis;generation of precursor metabolites and energy;water transport;smooth muscle contraction;signal transduction;G protein-coupled receptor signaling pathway;positive regulation of cytosolic calcium ion concentration;cell…	Neurophysin 2	renal water homeostasis; water transport; regulation of renal sodium excretion; positive regulation of renal sodium excretion; hyperosmotic salinity response; multicellular organismal water homeostasis
13.Cab_g57072_P2X1	g57072	12.0108364939412	3.00291134310213	1.50695365703765e-08	4.89358084228693e-06	1801	1554	25	23	874	3461	6	15	0	0	0	0	26	0	0	1009	Scaffold_2432	1224570	1237197	P2X1	IPR001429 P2X purinoreceptor;IPR027309 P2X purinoreceptor extracellular domain superfamily;IPR003048 P2X5 purinoceptor	go_process:GO:0033198 response to ATP;go_function:GO:0004931 extracellularly ATP-gated cation channel activity;go_function:GO:0001614 purinergic nucleotide receptor activity;go_component:GO:0005887 integral component of plasma membrane;go_process:GO:0098655 cation transmembrane transport;go_function:GO:0005216 ion channel activity;go_component:GO:0016020 membrane;go_process:GO:0006811 ion transpo…	ATP receptor	activation of MAPK activity;cell morphogenesis;response to hypoxia;positive regulation of cytokine production;phagolysosome assembly;tissue homeostasis;positive regulation of T cell mediated cytotoxicity;positive regulation of protein phosphorylation;regulation of sodium ion transport;serotonin secretion by platelet;response to ischemia;detection of hypoxic conditions in blood by carotid body che…	NA	NA
14.Cab_g33182	g33182	11.9760852896657	2.9685403309349	5.30152734218335e-06	0.000388326912537972	1428	1689	0	130	487	1263	2	23	0	0	0	0	0	0	0	1130	Scaffold_1473	4769508	4777148	NA	IPR016817 Mannose-P-dolichol utilization defect 1 protein	-	NA	NA	NA	NA
15.Cab_g24488	g24488	11.9518752920198	2.9407364111502	1.34026074933692e-09	8.70454681336019e-07	640	485	754	13	29	155	0	8	0	0	0	0	17	16	5	547	Scaffold_1107	8019	17111	NA	IPR012315 KASH domain;IPR030266 Nesprin-2	go_component:GO:0016021 integral component of membrane;go_component:GO:0034993 meiotic nuclear membrane microtubule tethering complex;go_function:GO:0051015 actin filament binding;go_component:GO:0005635 nuclear envelope	NA	NA	NA	NA
16.Cab_g14974_SPO11	g14974	11.9489387951348	2.94190915444279	8.14603335803669e-08	2.0302132691039e-05	1293	2082	10	27	479	1113	8	0	0	0	0	0	48	0	0	1916	Scaffold_640	366412	389128	SPO11	IPR004085 DNA topoisomerase VI, subunit A;IPR036388 Winged helix-like DNA-binding domain superfamily;IPR002815 Spo11/DNA topoisomerase VI subunit A;IPR034136 Topoisomerase 6 subunit A/Spo11, TOPRIM domain;IPR036078 Spo11/DNA topoisomerase VI subunit A superfamily	go_function:GO:0003918 DNA topoisomerase type II (double strand cut, ATP-hydrolyzing) activity;go_component:GO:0005694 chromosome;go_function:GO:0003677 DNA binding;go_process:GO:0006265 DNA topological change;go_function:GO:0016889 endodeoxyribonuclease activity, producing 3'-phosphomonoesters	Meiotic recombination protein SPO11	meiotic DNA double-strand break processing;ovarian follicle development;homologous chromosome pairing at meiosis;synaptonemal complex assembly;reciprocal meiotic recombination;male meiosis I;spermatogenesis;spermatid development;female gamete generation;protein localization to chromosome;meiotic DNA double-strand break formation;meiotic telomere clustering;oogenesis;double-strand break repair inv…	NA	NA
17.Cab_g14273_NBTL1	g14273	11.9060022375803	2.89909184357266	3.11327396887743e-08	9.46311632480603e-06	1888	1171	17	27	310	1006	0	0	0	0	0	0	5	0	4	1518	Scaffold_625	97214	163176	NBTL1	IPR006043 Xanthine/uracil/vitamin C permease;IPR006042 Xanthine/uracil permease	go_function:GO:0022857 transmembrane transporter activity;go_process:GO:0055085 transmembrane transport;go_component:GO:0016020 membrane	Na(+)/L-ascorbic acid transporter 2	sodium ion transport;response to oxidative stress;brain development;response to toxic substance;nucleobase transport;L-ascorbic acid transmembrane transport;L-ascorbic acid metabolic process;lung development;dehydroascorbic acid transport;transepithelial L-ascorbic acid transport;cellular response to ethanol;negative regulation of neuron death;positive regulation of dendrite extension	NA	NA
18.Cab_g17931_DDX43	g17931	11.8776814701832	2.87074618651515	8.91724845288022e-10	6.6824488021507e-07	1481	1534	35	37	272	2523	61	6	0	0	0	0	860	0	0	1587	Scaffold_727	3170832	3197088	DDX43	IPR004087 K Homology domain;IPR014001 Helicase superfamily 1/2, ATP-binding domain;IPR011545 DEAD/DEAH box helicase domain;IPR036612 K Homology domain, type 1 superfamily;IPR004088 K Homology domain, type 1;IPR000629 ATP-dependent RNA helicase DEAD-box, conserved site;IPR014014 RNA helicase, DEAD-box type, Q motif;IPR001650 Helicase, C-terminal;IPR027417 P-loop containing nucleoside triphosphate …	go_function:GO:0003676 nucleic acid binding;go_function:GO:0005524 ATP binding;go_function:GO:0003723 RNA binding;go_function:GO:0003724 RNA helicase activity	Probable ATP-dependent RNA helicase DDX43	regulation of defense response to virus;negative regulation of extrinsic apoptotic signaling pathway via death domain receptors;negative regulation of NIK/NF-kappaB signaling;positive regulation of interferon-alpha production;Wnt signaling pathway;alternative mRNA splicing, via spliceosome;positive regulation of G1/S transition of mitotic cell cycle;spermatogenesis;positive regulation of formatio…	Probable ATP-dependent RNA helicase DDX43	cellular response to osmotic stress
19.Cab_g17793_CHT1	g17793	11.7388444989169	2.73347689977364	2.42799003505337e-09	1.4413322548583e-06	1206	1559	17	54	155	987	0	7	0	0	0	0	10	0	3	1739	Scaffold_727	419484	446368	CHT1	IPR001734 Sodium/solute symporter;IPR038377 Sodium/glucose symporter superfamily	go_function:GO:0022857 transmembrane transporter activity;go_process:GO:0055085 transmembrane transport;go_component:GO:0016020 membrane	Hemicholinium-3-sensitive choline transporter	in utero embryonic development;amino acid transmembrane transport;sodium ion transport;neurotransmitter secretion;synaptic transmission, cholinergic;neuromuscular synaptic transmission;acetylcholine biosynthetic process;choline transport;transmembrane transport	NA	NA
20.Cab_g46089_imac	g46089	11.5786853351294	2.57634598122229	4.86643946117926e-06	0.00036189964298327	1162	1463	5	4	327	2096	0	0	0	0	0	0	0	0	4	1476	Scaffold_2044	1194554	1201433	imac	IPR001752 Kinesin motor domain;IPR036961 Kinesin motor domain superfamily;IPR027640 Kinesin-like protein;IPR027417 P-loop containing nucleoside triphosphate hydrolase	go_function:GO:0008017 microtubule binding;go_process:GO:0007018 microtubule-based movement;go_function:GO:0005524 ATP binding;go_function:GO:1990939 ATP-dependent microtubule motor activity	Kinesin-like protein unc-104	reproduction;regulation of cell growth;formation of primary germ layer;regulation of receptor recycling;nematode larval development;intracellular protein transport;retrograde vesicle-mediated transport, Golgi to endoplasmic reticulum;Golgi to endosome transport;regulation of striated muscle contraction;microtubule-based movement;mitotic spindle organization;mitotic metaphase plate congression;epi…	NA	NA
1.March_g10688_NIS	g10688	-12.3650277258594	3.35038608019289	2.59703446470122e-07	4.50842740922243e-05	0	0	0	0	0	22	180	64	1179	8	54	667	59	97	0	9	Scaffold_459	3000227	3014956	NIS	IPR038377 Sodium/glucose symporter superfamily;IPR001734 Sodium/solute symporter;IPR018212 Sodium/solute symporter, conserved site	go_function:GO:0022857 transmembrane transporter activity;go_process:GO:0055085 transmembrane transport;go_component:GO:0016020 membrane	Na(+)/I(-) cotransporter	thyroid hormone generation;ion transport;sodium ion transport;iodide transport;cellular response to cAMP;cellular response to gonadotropin stimulus;transport across blood-brain barrier;iodide transmembrane transport	NA	NA
2.March_g62422	g62422	-11.0663236296386	2.06427786923651	5.4611945492712e-20	1.06405914598e-15	0	0	0	0	42	11	6	50	164	274	146	284	0	0	0	0	Scaffold_2618	85194	88689	NA	IPR036397 Ribonuclease H superfamily;IPR038717 Tc1-like transposase, DDE domain	go_function:GO:0003676 nucleic acid binding	Transposable element Barney transposase	transposition, DNA-mediated;DNA integration	NA	NA
3.March_g22333	g22333	-10.9149722054014	1.91518532270191	6.60259454368086e-17	4.3012377100103e-13	0	0	0	0	47	0	10	39	165	68	294	299	0	0	0	0	Scaffold_992	292448	293650	NA	IPR003879 Butyrophylin-like, SPRY domain;IPR006574 SPRY-associated;IPR001841 Zinc finger, RING-type;IPR000315 B-box-type zinc finger;IPR043136 B30.2/SPRY domain superfamily;IPR013083 Zinc finger, RING/FYVE/PHD-type;IPR017907 Zinc finger, RING-type, conserved site;IPR001870 B30.2/SPRY domain;IPR013320 Concanavalin A-like lectin/glucanase domain superfamily	go_function:GO:0008270 zinc ion binding	NA	NA	NA	NA
4.March_g41066	g41066	-9.90117940919395	0.926663972202633	4.89727815417868e-08	1.38287779066692e-05	0	0	0	0	0	0	0	0	9	36	214	191	0	2	158	0	Scaffold_1873	348749	350608	NA	IPR044822 Myb/SANT-like DNA-binding domain 4	-	NA	NA	NA	NA
5.March_g22332	g22332	-9.89251529583062	0.914944723224107	1.19597796979212e-14	4.66048695268595e-11	0	0	0	0	31	0	0	34	82	63	113	139	0	0	0	0	Scaffold_992	289979	290393	NA	IPR043136 B30.2/SPRY domain superfamily;IPR001870 B30.2/SPRY domain;IPR013320 Concanavalin A-like lectin/glucanase domain superfamily	-	NA	NA	NA	NA
6.March_g71495_cnr1a	g71495	-9.86104545472072	0.878935436374365	3.94515320663431e-06	0.000319199208809512	0	0	0	0	0	5	49	21	222	11	12	78	20	82	16	3	Scaffold_2964	2030361	2048567	cnr1a	IPR000276 G protein-coupled receptor, rhodopsin-like;IPR002230 Cannabinoid receptor family;IPR000810 Cannabinoid receptor type 1;IPR017452 GPCR, rhodopsin-like, 7TM	go_component:GO:0016021 integral component of membrane;go_process:GO:0007186 G protein-coupled receptor signaling pathway;go_function:GO:0004930 G protein-coupled receptor activity;go_function:GO:0004949 cannabinoid receptor activity	Cannabinoid receptor type 1A	regulation of synaptic transmission, glutamatergic;aging;retrograde trans-synaptic signaling by endocannabinoid;learning or memory;regulation of insulin secretion;glucose homeostasis;positive regulation of long-term synaptic depression;axonal fasciculation;negative regulation of serotonin secretion;cell growth;positive regulation of acute inflammatory response to antigenic stimulus;receptor inter…	NA	NA
7.March_g42643	g42643	-9.36840721055583	0.409402936138311	1.06035668408009e-10	1.21529350780097e-07	0	0	0	0	151	10	12	85	68	50	37	115	12	32	82	10	Scaffold_1906	5196345	5198440	NA	IPR027806 Harbinger transposase-derived nuclease domain	-	NA	NA	NA	NA
8.March_g66345	g66345	-9.06788596454244	0.123754973381197	3.15594250402648e-11	3.84314898427825e-08	0	0	0	0	44	0	5	8	36	47	77	65	0	1	0	0	Scaffold_2763	31948	42143	NA	IPR001611 Leucine-rich repeat;IPR032675 Leucine-rich repeat domain superfamily	go_function:GO:0005515 protein binding	NA	NA	NA	NA
9.March_g48816	g48816	-9.00254906097333	0.0607355525008027	2.24536572581204e-10	2.43048365565121e-07	0	0	0	0	7	0	3	48	59	40	52	52	36	25	25	3	Scaffold_2134	809004	849871	NA	IPR006574 SPRY-associated;IPR029495 NACHT-associated domain;IPR006553 Leucine-rich repeat, cysteine-containing subtype;IPR001611 Leucine-rich repeat;IPR032675 Leucine-rich repeat domain superfamily;IPR041075 NOD2, winged helix domain;IPR007111 NACHT nucleoside triphosphatase;IPR041267 NACHT, LRR and PYD domains-containing protein, helical domain HD2;IPR043136 B30.2/SPRY domain superfamily;IPR0133…	go_function:GO:0005515 protein binding	NA	NA	NA	NA
10.March_g17341	g17341	-8.88711897904651	-0.0461076020451051	4.22982948966513e-07	6.4892911635146e-05	0	0	0	0	28	11	19	36	24	61	10	106	0	0	4	0	Scaffold_716	3330120	3333512	NA	IPR006703 AIG1-type guanine nucleotide-binding (G) domain;IPR027417 P-loop containing nucleoside triphosphate hydrolase	go_function:GO:0005525 GTP binding	NA	NA	NA	NA
11.March_g49749	g49749	-8.84301210540542	-0.0880755582217622	5.24438958990731e-09	2.27070415043898e-06	0	0	0	0	0	3	7	40	42	18	52	83	0	36	78	27	Scaffold_2180	1215270	1222152	NA	IPR003961 Fibronectin type III;IPR015373 Interferon/interleukin receptor domain;IPR013783 Immunoglobulin-like fold;IPR036116 Fibronectin type III superfamily	go_function:GO:0005515 protein binding	NA	NA	NA	NA
12.March_g52349	g52349	-8.77093144652685	1.11856497009908	9.65132317418383e-08	2.23864738959283e-05	0	1	0	0	22	148	1	39	14	24	97	398	6	5	9	0	Scaffold_2280	3399	8957	NA	IPR041588 Integrase zinc-binding domain;IPR036397 Ribonuclease H superfamily;IPR008042 Retrotransposon, Pao;IPR043128 Reverse transcriptase/Diguanylate cyclase domain;IPR040676 Domain of unknown function DUF5641;IPR001584 Integrase, catalytic core;IPR012337 Ribonuclease H-like superfamily;IPR043502 DNA/RNA polymerase superfamily	go_function:GO:0003676 nucleic acid binding;go_process:GO:0015074 DNA integration	NA	NA	NA	NA
13.March_g1495_MMP14	g1495	-8.70169410184138	-0.213909422210596	5.69174087826645e-06	0.000408126302999756	0	0	0	0	6	14	14	36	14	6	42	135	51	10	17	20	Scaffold_80	36004	54572	MMP14	IPR021190 Peptidase M10A;IPR018487 Hemopexin-like repeats;IPR006026 Peptidase, metallopeptidase;IPR001818 Peptidase M10, metallopeptidase;IPR024079 Metallopeptidase, catalytic domain superfamily;IPR021805 Peptidase M10A, matrix metallopeptidase, C-terminal;IPR036375 Hemopexin-like domain superfamily;IPR018486 Hemopexin, conserved site;IPR000585 Hemopexin-like domain	go_process:GO:0006508 proteolysis;go_function:GO:0008270 zinc ion binding;go_function:GO:0004222 metalloendopeptidase activity;go_function:GO:0008237 metallopeptidase activity;go_component:GO:0031012 extracellular matrix	MMP-14	skeletal system development;ossification;angiogenesis;ovarian follicle development;response to hypoxia;kidney development;endothelial cell proliferation;endochondral ossification;cellular protein modification process;proteolysis;response to oxidative stress;male gonad development;response to mechanical stimulus;response to hormone;glial cell differentiation;positive regulation of myotube differen…	NA	NA
14.March_g61315_LANCL3	g61315	-8.51315263303995	-0.399830096492818	9.01215760412882e-07	0.000109745549224279	0	0	0	0	3	0	8	0	58	8	37	39	0	0	11	4	Scaffold_2582	316036	328891	LANCL3	IPR007822 Lanthionine synthetase C-like;IPR020464 LanC-like protein, eukaryotic;IPR012341 Six-hairpin glycosidase-like superfamily	go_process:GO:0005975 carbohydrate metabolic process	LanC-like protein 3	carbohydrate metabolic process	NA	NA
15.March_g33599	g33599	-8.3277242028959	0.684817694187609	5.01210513684239e-07	7.51198896047978e-05	0	1	0	0	1	2	0	2	53	3	131	176	0	0	1	0	Scaffold_1497	571157	572392	NA	IPR000477 Reverse transcriptase domain;IPR043502 DNA/RNA polymerase superfamily	-	NA	NA	NA	NA
16.March_g54269	g54269	-8.24300019596177	-0.637520173131423	3.96907682816844e-06	0.000319559888099313	0	0	0	0	9	33	10	119	10	7	66	56	10	8	20	20	Scaffold_2341	32930	63371	NA	IPR001304 C-type lectin-like;IPR016186 C-type lectin-like/link domain superfamily;IPR018378 C-type lectin, conserved site;IPR016187 C-type lectin fold	-	NA	NA	NA	NA
17.March_g30608_tc1a	g30608	-8.05934240266662	-0.810864899273212	1.14603955765684e-07	2.50323234459028e-05	0	0	0	0	49	0	0	0	21	30	16	42	0	21	31	12	Scaffold_1365	78466	84386	tc1a	IPR038717 Tc1-like transposase, DDE domain;IPR002492 Transposase, Tc1-like;IPR036397 Ribonuclease H superfamily	go_function:GO:0003677 DNA binding;go_process:GO:0015074 DNA integration;go_process:GO:0006313 transposition, DNA-mediated;go_function:GO:0003676 nucleic acid binding	Leucine-rich repeat-containing protein 35	microtubule cytoskeleton organization;transposition, DNA-mediated;tubulin complex assembly;post-chaperonin tubulin folding pathway;DNA integration	NA	NA
18.March_g48729_bsk	g48729	-8.02158446772772	-0.843502411607824	9.71226623792007e-06	0.000622479590064588	0	0	0	0	22	22	4	24	28	8	9	65	0	106	0	0	Scaffold_2131	997741	1017229	bsk	IPR000719 Protein kinase domain;IPR011009 Protein kinase-like domain superfamily	go_function:GO:0004672 protein kinase activity;go_process:GO:0006468 protein phosphorylation;go_function:GO:0005524 ATP binding	MAP kinase HOG1	DNA damage checkpoint;MAPK cascade;activation of MAPK activity;cell wall integrity MAPK cascade;response to reactive oxygen species;response to superoxide;pheromone-dependent signal transduction involved in conjugation with cellular fusion;cell morphogenesis;negative regulation of exit from mitosis;signal transduction involved in filamentous growth;invasive growth in response to glucose limitatio…	MAP kinase HOG1	response to osmotic stress; hyperosmotic response; osmosensory signaling pathway; response to salt stress; hypotonic salinity response; cellular response to osmotic stress; cellular hyperosmotic response; positive regulation of response to salt stress
19.March_g29831	g29831	-7.99985703302669	0.694125205918002	1.34713631302072e-06	0.000149134113198271	0	0	0	1	5	0	0	2	31	34	269	21	0	0	0	0	Scaffold_1340	565681	583197	NA	IPR038717 Tc1-like transposase, DDE domain;IPR029526 PiggyBac transposable element-derived protein;IPR036397 Ribonuclease H superfamily	go_function:GO:0003676 nucleic acid binding	NA	NA	NA	NA
20.March_g59719_VAV	g59719	-7.94256685757033	-0.914195017241208	3.58808799814432e-06	0.000302642019722268	0	0	0	0	14	2	10	31	26	7	16	55	15	0	23	0	Scaffold_2532	115010	144419	VAV	IPR001715 Calponin homology domain;IPR036872 CH domain superfamily;IPR022613 Calmodulin-regulated spectrin-associated protein, CH domain;IPR028530 Protein vav1	go_function:GO:0005515 protein binding;go_process:GO:0007264 small GTPase mediated signal transduction	Proto-oncogene vav	angiogenesis;immune response-regulating cell surface receptor signaling pathway;vesicle fusion;phagocytosis;immune response;cellular response to DNA damage stimulus;G protein-coupled receptor signaling pathway;integrin-mediated signaling pathway;small GTPase mediated signal transduction;regulation of cell size;cell migration;cytokine-mediated signaling pathway;cell projection assembly;lamellipodi…	NA	NA

## Sheet: Hoja 1 - annotated_AdraCab_stom
annotated_AdraCab_stomach
	gene_id	logFC	logCPM	PValue	FDR	AT30482_2	AT30483_2	AT30484_2	AT30485_2	AT30487_2	AT30488_2	AT30489_2	AT30490_2	AT30493_2	AT30494_2	AT30495_2	AT30496_2	AT30503_2	AT30504_2	AT30505_2	AT30506_2	Scaffold_ID	Start	End	gene_name	InterPro_Annot	InterPro_GO_Terms	sma3s_name	sma3s_Annot	Full_name_Salinity	Function_Salinity
1.1.Adra_g38306_NAGA	g38306	12.0661002394062	3.00459235687752	1.66559083080634e-12	3.27754963686071e-08	0	0	0	0	132	132	357	360	951	0	0	620	366	439	611	148	Scaffold_1751	1989016	1995106	NAGA	IPR002241 Glycoside hydrolase, family 27;IPR013785 Aldolase-type TIM barrel;IPR017853 Glycoside hydrolase superfamily	go_process:GO:0005975 carbohydrate metabolic process;go_function:GO:0004553 hydrolase activity, hydrolyzing O-glycosyl compounds;go_function:GO:0003824 catalytic activity	Alpha-galactosidase B	oligosaccharide metabolic process;carbohydrate catabolic process;glycoside catabolic process;glycolipid catabolic process;glycosylceramide catabolic process	NA	NA
2.1.Adra_g17481_NTT4	g17481	11.1093939642361	2.05522016985479	1.08425425938088e-08	7.11198510536564e-05	0	0	0	0	11	73	268	356	60	0	222	55	180	302	75	111	Scaffold_717	988974	990542	NTT4	IPR000175 Sodium:neurotransmitter symporter;IPR037272 Sodium:neurotransmitter symporter superfamily	go_component:GO:0016021 integral component of membrane	Sodium-dependent neutral amino acid transporter B(0)AT2	amino acid transmembrane transport;neurotransmitter transport;amino acid transport;response to osmotic stress;hyperosmotic response;brain development;response to nutrient;neutral amino acid transport;glycine transport;leucine transport;proline transport;amino-acid betaine transport;alanine transport;proline transmembrane transport;sodium ion transmembrane transport;amino acid import across plasma…	NA	NA
3.1.Adra_g69606	g69606	10.3876898538141	1.347639519906	8.25870202593645e-08	0.000325029476932755	0	0	0	0	3	3	7	22	6	0	8	7	63	117	347	31	Scaffold_2882	1	4165	NA	IPR001611 Leucine-rich repeat;IPR036397 Ribonuclease H superfamily;IPR038717 Tc1-like transposase, DDE domain;IPR032675 Leucine-rich repeat domain superfamily	go_function:GO:0005515 protein binding;go_function:GO:0003676 nucleic acid binding	NA	NA	NA	NA
4.1.Cab_g55418	g55418	-13.0124462457381	3.94673618007666	1.34506648931129e-09	1.32341091883338e-05	114	3893	56	876	11091	18	0	491	0	3	13	0	0	0	0	0	Scaffold_2382	390867	394511	NA	IPR000519 P-type trefoil domain;IPR001507 Zona pellucida domain;IPR042235 Zona pellucida, ZP-C domain	-	NA	NA	NA	NA
5.1.Cab_g11806_MCT1	g11806	-11.8650568436002	2.80462229699257	5.79997572633198e-08	0.000285329805856902	31	579	57	742	2116	12	4	257	0	15	21	0	0	0	0	0	Scaffold_494	3367625	3372425	MCT1	IPR015095 Alkylated DNA repair protein AlkB, homologue 8, N-terminal;IPR011701 Major facilitator superfamily;IPR036259 MFS transporter superfamily;IPR020846 Major facilitator superfamily domain	go_function:GO:0016706 2-oxoglutarate-dependent dioxygenase activity;go_function:GO:0008168 methyltransferase activity;go_function:GO:0022857 transmembrane transporter activity;go_process:GO:0055085 transmembrane transport	MCT 1	pyruvate metabolic process;lipid metabolic process;centrosome cycle;monocarboxylic acid transport;lactate transport;mevalonate transport;response to food;lactate transmembrane transport;plasma membrane lactate transport;glucose homeostasis;regulation of insulin secretion;leukocyte migration;behavioral response to nutrient;cellular response to organic cyclic compound;transport across blood-brain b…	NA	NA
6.1.Cab_g3699_SUSD2	g3699	-11.428480686608	2.37169626283705	1.95590491697742e-07	0.000481103711953521	40	332	30	585	713	0	0	131	0	0	8	1	0	0	0	0	Scaffold_163	40194	55080	SUSD2	IPR001846 von Willebrand factor, type D domain;IPR000436 Sushi/SCR/CCP domain;IPR005533 AMOP domain;IPR036691 Endonuclease/exonuclease/phosphatase superfamily;IPR015095 Alkylated DNA repair protein AlkB, homologue 8, N-terminal;IPR000477 Reverse transcriptase domain;IPR029526 PiggyBac transposable element-derived protein;IPR035976 Sushi/SCR/CCP superfamily	go_function:GO:0016706 2-oxoglutarate-dependent dioxygenase activity;go_function:GO:0008168 methyltransferase activity	Sushi domain-containing protein 2	negative regulation of cell division;negative regulation of cell cycle G1/S phase transition	NA	NA
7.1.Cab_g7986_aml	g7986	-10.6375914717262	1.59376489377092	1.3422720067883e-07	0.000377331836422575	20	546	41	201	250	0	0	182	0	15	25	0	0	0	0	0	Scaffold_338	488177	500976	aml	IPR006046 Alpha amylase;IPR031319 Alpha-amylase, C-terminal domain;IPR006047 Glycosyl hydrolase, family 13, catalytic domain;IPR006048 Alpha-amylase/branching enzyme, C-terminal all beta;IPR013780 Glycosyl hydrolase, all-beta;IPR017853 Glycoside hydrolase superfamily	go_process:GO:0005975 carbohydrate metabolic process;go_function:GO:0043169 cation binding;go_function:GO:0004556 alpha-amylase activity;go_function:GO:0003824 catalytic activity	Alpha-amylase-related protein	carbohydrate metabolic process;starch catabolic process;digestion;oligosaccharide metabolic process;oligosaccharide catabolic process;response to bacterium;carbohydrate catabolic process;polysaccharide digestion	Acute myeloid leukemia 1 protein	regulation of bicellular tight junction assembly
8.1.Cab_g21914	g21914	-10.218486923641	1.18309426312727	3.08829035955929e-07	0.000675237529948975	202	120	8	190	157	46	0	697	0	32	7	0	0	0	0	0	Scaffold_955	148194	150185	NA	IPR003599 Immunoglobulin subtype;IPR013783 Immunoglobulin-like fold;IPR013106 Immunoglobulin V-set domain;IPR007110 Immunoglobulin-like domain;IPR036179 Immunoglobulin-like domain superfamily	-	NA	NA	NA	NA
9.1.Cab_g14360	g14360	-7.06219964797919	2.12615324549825	1.05250547520929e-07	0.000345186712352807	82	709	153	191	336	490	51	165	234	342	266	398	4	0	0	4	Scaffold_625	2344466	2348305	NA	IPR033214 A-kinase-interacting protein 1	go_process:GO:1901222 regulation of NIK/NF-kappaB signaling	NA	NA	NA	NA
