# Supplementary material
Source: Research Square preprint supplement (doi:10.21203/rs.3.rs-9115348/v1)
Supplement: Supplementary file 5 [file 7f9532a05a859732efae0650.xlsx]

## Sheet: Hoja 1 - gene_df_gill
gene_id	sampleA	sampleB	logFC	logCPM	PValue	FDR	AT30482_1	AT30483_1	AT30484_1	AT30485_1	AT30487_1	AT30488_1	AT30489_1	AT30490_1	AT30493_1	AT30494_1	AT30495_1	AT30496_1	AT30503_1	AT30504_1	AT30505_1	AT30506_1	Scaffold_ID	Start	End	gene_name	InterPro_Annot	InterPro_GO_Terms	sma3s_Annot	Full_name_Salinity	Function_Salinity	overexpression	Gene_ID_name	ID_long
g18473	Adra	Cab	8.66682022286063	1.65752447475428	2.65772540576449e-29	9.38265659081724e-26	0	1	0	0	0	0	0	0	0	0	0	0	142	182	195	155	Scaffold_750	257144	261558	NA	IPR000477 Reverse transcriptase domain;IPR041588 Integrase zinc-binding domain;IPR001584 Integrase, catalytic core;IPR041577 Reverse transcriptase/retrotransposon-derived protein, RNase H-like domain;IPR036397 Ribonuclease H superfamily;IPR043128 Reverse transcriptase/Diguanylate cyclase domain;IPR012337 Ribonuclease H-like superfamily;IPR043502 DNA/RNA polymerase superfamily	go_process:GO:0015074 DNA integration;go_function:GO:0003676 nucleic acid binding	NA	NA	NA	Adra	Adra-UP g18473	Adra-UP g18473
g20884	Adra	Cab	9.94731100977674	1.27760862856999	2.81450187289586e-27	8.51668266738288e-24	0	0	0	0	0	0	141	0	155	0	156	0	85	150	116	181	Scaffold_875	4605690	4613685	NA	NA	NA	NA	NA	NA	Adra	Adra-UP g20884	Adra-UP g20884
g59807	Adra	Cab	9.56562503873134	0.912161249820092	3.53621469488613e-23	5.35029283336271e-20	0	0	0	0	0	0	0	0	0	0	0	0	76	106	111	105	Scaffold_2534	6110	6867	NA	NA	-	NA	NA	NA	Adra	Adra-UP g59807	Adra-UP g59807
g55413	Adra	Cab	2.17263100940722	5.5264634547386	1.20895537248346e-21	1.60050579374654e-18	204	255	503	675	193	182	374	289	335	651	810	413	1310	2671	1984	2705	Scaffold_2382	304563	315436	acyH	IPR000043 Adenosylhomocysteinase-like;IPR015878 S-adenosyl-L-homocysteine hydrolase, NAD binding domain;IPR042172 Adenosylhomocysteinase-like superfamily;IPR020082 S-adenosyl-L-homocysteine hydrolase, conserved site;IPR036291 NAD(P)-binding domain superfamily	go_function:GO:0004013 adenosylhomocysteinase activity	Adenosylhomocysteinase	Adenosylhomocysteinase	positive regulation of sodium ion transport; regulation of ion transmembrane transporter activity; angiotensin-activated signaling pathway; epithelial fluid transport; regulation of anion transport	Adra	Adra-UP g55413 acyH	Adra-UP g55413 Adenosylhomocysteinase
g45758	Adra	Cab	6.23371432056122	1.85883643708438	3.32949906592536e-19	3.53348949495394e-16	0	2	4	3	348	71	47	232	257	142	29	57	75	261	139	358	Scaffold_2032	472796	474893	NA	IPR027806 Harbinger transposase-derived nuclease domain	-	NA	NA	NA	Adra	Adra-UP g45758	Adra-UP g45758
g33002	Adra	Cab	9.49819357238291	0.847731636907417	5.88784209198869e-19	5.93887005678592e-16	0	0	0	0	5	0	0	0	0	0	0	4	67	111	129	71	Scaffold_1473	980020	987964	NA	NA	-	NA	NA	NA	Adra	Adra-UP g33002	Adra-UP g33002
g59808	Adra	Cab	8.9265438359298	0.309893288204418	9.98359691074138e-17	9.19445868536191e-14	0	0	0	0	0	0	0	0	0	0	0	0	59	57	67	68	Scaffold_2534	6897	12165	NA	NA	-	NA	NA	NA	Adra	Adra-UP g59808	Adra-UP g59808
g62697	Adra	Cab	5.90627099344882	1.19586107265968	6.35920876153396e-16	5.18079846103124e-13	0	1	3	3	197	44	31	158	145	89	21	41	47	162	87	219	Scaffold_2624	165725	167655	NA	IPR027806 Harbinger transposase-derived nuclease domain	-	NA	NA	NA	Adra	Adra-UP g62697	Adra-UP g62697
g30608	Adra	Cab	6.55845417576389	-0.342856831430094	4.01935578689117e-13	2.30102687237646e-10	0	0	1	0	17	32	0	46	31	35	47	32	23	50	39	46	Scaffold_1365	78466	84386	tc1a	IPR038717 Tc1-like transposase, DDE domain;IPR002492 Transposase, Tc1-like;IPR036397 Ribonuclease H superfamily	go_function:GO:0003677 DNA binding;go_process:GO:0015074 DNA integration;go_process:GO:0006313 transposition, DNA-mediated;go_function:GO:0003676 nucleic acid binding	Leucine-rich repeat-containing protein 35	NA	NA	Adra	Adra-UP g30608 tc1a	Adra-UP g30608
g33822	Adra	Cab	6.38279440218622	0.606565219223972	1.03751286295977e-12	5.78331512189838e-10	0	0	3	0	38	0	34	36	0	0	0	0	71	147	52	52	Scaffold_1512	617308	621794	NA	IPR008361 Melanin-concentrating hormone receptor;IPR000276 G protein-coupled receptor, rhodopsin-like;IPR017452 GPCR, rhodopsin-like, 7TM	go_component:GO:0016021 integral component of membrane;go_process:GO:0007186 G protein-coupled receptor signaling pathway;go_function:GO:0004930 G protein-coupled receptor activity	NA	NA	NA	Adra	Adra-UP g33822	Adra-UP g33822
g23953	Adra	Cab	6.37359012892605	0.597425521023494	1.5780778469275e-12	8.57098588554316e-10	0	0	3	0	38	0	34	36	0	0	0	0	71	147	50	52	Scaffold_1073	5382355	5386865	NA	IPR008361 Melanin-concentrating hormone receptor;IPR000276 G protein-coupled receptor, rhodopsin-like;IPR017452 GPCR, rhodopsin-like, 7TM	go_component:GO:0016021 integral component of membrane;go_process:GO:0007186 G protein-coupled receptor signaling pathway;go_function:GO:0004930 G protein-coupled receptor activity	NA	NA	NA	Adra	Adra-UP g23953	Adra-UP g23953
g33786	Adra	Cab	5.74230025761009	0.824176689367436	2.30823008120316e-12	1.22232323950113e-09	0	0	6	0	3	0	15	42	0	26	33	0	72	126	103	68	Scaffold_1512	3530	4636	NA	IPR004244 Transposase, L1	-	NA	NA	NA	Adra	Adra-UP g33786	Adra-UP g33786
g18685	Adra	Cab	5.38165864826273	0.31026866430027	3.91858980816396e-12	2.02447730040315e-09	0	1	2	2	81	32	17	88	114	62	21	10	27	87	46	105	Scaffold_759	399947	404752	NA	IPR027806 Harbinger transposase-derived nuclease domain;IPR038717 Tc1-like transposase, DDE domain;IPR002492 Transposase, Tc1-like;IPR036397 Ribonuclease H superfamily	go_function:GO:0003677 DNA binding;go_process:GO:0015074 DNA integration;go_process:GO:0006313 transposition, DNA-mediated;go_function:GO:0003676 nucleic acid binding	NA	NA	NA	Adra	Adra-UP g18685	Adra-UP g18685
g43070	Adra	Cab	5.28918632793353	1.04927680059697	4.11211813437351e-12	2.05306096976426e-09	0	1	6	3	165	45	26	140	134	86	28	38	40	145	74	202	Scaffold_1920	1932	12406	NA	IPR027806 Harbinger transposase-derived nuclease domain;IPR036397 Ribonuclease H superfamily	go_function:GO:0003676 nucleic acid binding	NA	NA	NA	Adra	Adra-UP g43070	Adra-UP g43070
g39689	Adra	Cab	8.32728867093308	-0.23516069845902	4.16776610800978e-12	2.05306096976426e-09	0	0	0	0	0	0	32	56	58	0	58	0	35	40	27	69	Scaffold_1813	284775	289944	NA	NA	-	NA	NA	NA	Adra	Adra-UP g39689	Adra-UP g39689
g6233	Adra	Cab	2.6761922074554	4.89523081651631	7.35898310460562e-12	3.46395511381681e-09	76	117	158	505	949	930	357	1502	927	829	203	296	1006	1291	1201	2356	Scaffold_256	1936711	1945941	NARC1	IPR015500 Peptidase S8, subtilisin-related;IPR036852 Peptidase S8/S53 domain superfamily;IPR041051 Proprotein convertase subtilisin/kexin type 9, C-terminal domain 3;IPR041254 Proprotein convertase subtilisin/kexin type 9, C-terminal;IPR000209 Peptidase S8/S53 domain;IPR034193 Proteinase K-like catalytic domain	go_process:GO:0006508 proteolysis;go_function:GO:0004252 serine-type endopeptidase activity;go_function:GO:0008236 serine-type peptidase activity	PC9	NA	NA	Adra	Adra-UP g6233 NARC1	Adra-UP g6233
g52358	Adra	Cab	4.91190907369286	1.09961493046775	7.79980654797423e-12	3.59164135433022e-09	0	4	3	6	181	46	28	144	136	90	25	43	41	152	79	202	Scaffold_2284	3282	9688	NA	IPR027806 Harbinger transposase-derived nuclease domain	-	NA	NA	NA	Adra	Adra-UP g52358	Adra-UP g52358
g59246	Adra	Cab	3.66526693748807	7.39309384043632	1.0111642986442e-11	4.46218378622531e-09	259	761	383	780	540	971	463	1543	819	888	1252	1227	3712	5840	8821	17846	Scaffold_2521	200978	218099	ae1	IPR001717 Anion exchange protein;IPR003020 Bicarbonate transporter, eukaryotic;IPR011531 Bicarbonate transporter, C-terminal;IPR016152 Phosphotransferase/anion transporter;IPR013769 Band 3 cytoplasmic domain;IPR018241 Anion exchange, conserved site	go_process:GO:0006820 anion transport;go_function:GO:0005452 inorganic anion exchanger activity;go_component:GO:0016020 membrane;go_component:GO:0016021 integral component of membrane;go_function:GO:0008509 anion transmembrane transporter activity	AE 2	Electrogenic sodium bicarbonate cotransporter 1	renal system process; regulation of systemic arterial blood pressure; sodium ion transport; anion transport; chloride transport; cellular ion homeostasis; sodium ion transmembrane transport; negative regulation of urine volume; sodium ion export across plasma membrane; ion homeostasis; chloride transmembrane transport; proton transmembrane transport	Adra	Adra-UP g59246 ae1	Adra-UP g59246 Electrogenic sodium bicarbonate cotransporter 1
g38301	Adra	Cab	2.10647769987358	4.58479969411356	1.3371172712305e-11	5.78016694677644e-09	71	151	365	367	131	188	228	304	149	231	208	173	643	1951	721	1280	Scaffold_1751	1860560	1890697	ERR1	IPR001628 Zinc finger, nuclear hormone receptor-type;IPR001723 Nuclear hormone receptor;IPR000536 Nuclear hormone receptor, ligand-binding domain;IPR013088 Zinc finger, NHR/GATA-type;IPR027289 Oestrogen-related receptor;IPR024178 Oestrogen receptor/oestrogen-related receptor;IPR035500 Nuclear hormone receptor-like domain superfamily	go_function:GO:0008270 zinc ion binding;go_function:GO:0003700 DNA-binding transcription factor activity;go_process:GO:0006355 regulation of transcription, DNA-templated;go_function:GO:0043565 sequence-specific DNA binding;go_function:GO:0003707 steroid hormone receptor activity;go_function:GO:0003677 DNA binding;go_function:GO:0005496 steroid binding;go_component:GO:0005634 nucleus	ERR-alpha	NA	NA	Adra	Adra-UP g38301 ERR1	Adra-UP g38301
g25100	Adra	Cab	5.18038432372665	0.562395720961151	2.49251132198703e-11	1.03522303573195e-08	0	2	3	2	132	30	15	110	121	96	24	36	26	94	64	135	Scaffold_1126	1399755	1401685	NA	IPR027806 Harbinger transposase-derived nuclease domain	-	NA	NA	NA	Adra	Adra-UP g25100	Adra-UP g25100
g72669	Adra	Cab	6.63258118781724	-0.234255074452109	4.02237861140936e-11	1.57781525457172e-08	0	1	0	0	0	0	0	0	0	0	0	0	47	33	41	41	Scaffold_3005	209643	211916	NA	IPR041588 Integrase zinc-binding domain;IPR001584 Integrase, catalytic core;IPR036397 Ribonuclease H superfamily;IPR012337 Ribonuclease H-like superfamily	go_process:GO:0015074 DNA integration;go_function:GO:0003676 nucleic acid binding	NA	NA	NA	Adra	Adra-UP g72669	Adra-UP g72669
g10407	Adra	Cab	4.74628408824131	0.543635757320493	7.39422644433785e-11	2.65465261938923e-08	0	1	5	4	110	35	20	116	113	92	18	29	26	95	65	126	Scaffold_445	288111	294387	NA	IPR027806 Harbinger transposase-derived nuclease domain	-	NA	NA	NA	Adra	Adra-UP g10407	Adra-UP g10407
g42643	Adra	Cab	6.21067980987189	0.403025867446414	1.60426207436989e-10	5.39388559671476e-08	0	0	0	3	145	43	34	122	192	109	31	76	21	88	55	125	Scaffold_1906	5196345	5198440	NA	IPR027806 Harbinger transposase-derived nuclease domain	-	NA	NA	NA	Adra	Adra-UP g42643	Adra-UP g42643
g59806	Adra	Cab	8.07593370195825	-0.468383520406395	3.94318801707882e-10	1.24663594892184e-07	0	0	0	0	0	0	0	1	0	0	0	0	36	33	45	22	Scaffold_2534	5742	6005	NA	NA	NA	NA	NA	NA	Adra	Adra-UP g59806	Adra-UP g59806
g53354	Adra	Cab	7.9367629671728	-0.590709036417883	1.21420449725297e-09	3.47557833254221e-07	0	0	0	0	4	21	0	48	0	12	6	21	28	14	43	39	Scaffold_2320	1026476	1032362	ASB5	IPR002110 Ankyrin repeat;IPR001496 SOCS box domain;IPR020683 Ankyrin repeat-containing domain;IPR036770 Ankyrin repeat-containing domain superfamily;IPR036036 SOCS box-like domain superfamily	go_function:GO:0005515 protein binding;go_process:GO:0035556 intracellular signal transduction	ASB-5	NA	NA	Adra	Adra-UP g53354 ASB5	Adra-UP g53354
g6230	Adra	Cab	2.7032216943982	1.97302445388304	1.37530379925627e-09	3.88422467677952e-07	9	24	21	47	100	115	72	180	129	99	34	27	150	154	133	315	Scaffold_256	1926133	1929782	NA	IPR037045 Peptidase S8 propeptide/proteinase inhibitor I9 superfamily	-	NA	NA	NA	Adra	Adra-UP g6230	Adra-UP g6230
g3994	Adra	Cab	3.83002191057989	0.39876943934557	1.59162774028641e-09	4.37842322009697e-07	0	5	5	6	6	4	3	21	6	4	6	0	44	67	85	60	Scaffold_176	168852	172087	NA	IPR002492 Transposase, Tc1-like;IPR038717 Tc1-like transposase, DDE domain;IPR036397 Ribonuclease H superfamily;IPR009057 Homeobox-like domain superfamily	go_function:GO:0003677 DNA binding;go_process:GO:0015074 DNA integration;go_process:GO:0006313 transposition, DNA-mediated;go_function:GO:0003676 nucleic acid binding	NA	NA	NA	Adra	Adra-UP g3994	Adra-UP g3994
g63736	Adra	Cab	2.43944434679118	6.47431404655671	1.63949675890969e-09	4.45228465990065e-07	175	289	1395	1329	1206	1743	670	2889	2420	8162	6274	2069	2262	7319	3871	4158	Scaffold_2663	884577	890620	NA	NA	-	NA	NA	NA	Adra	Adra-UP g63736	Adra-UP g63736
g14004	Adra	Cab	2.40533782250751	4.95425811728721	1.82800553940916e-09	4.9013687766791e-07	121	112	183	591	154	52	206	363	464	361	746	333	1282	1634	1636	1181	Scaffold_619	734	19107	pkpA	IPR000719 Protein kinase domain;IPR024678 Serine/threonine-protein kinase OSR1/WNK, CCT domain;IPR008271 Serine/threonine-protein kinase, active site;IPR011009 Protein kinase-like domain superfamily	go_function:GO:0004672 protein kinase activity;go_process:GO:0006468 protein phosphorylation;go_function:GO:0005524 ATP binding;go_function:GO:0004674 protein serine/threonine kinase activity	Protein kinase with no lysine 1	NA	NA	Adra	Adra-UP g14004 pkpA	Adra-UP g14004
g46529	Adra	Cab	7.56456565307614	-0.907968299137969	2.04794074885973e-09	5.22644348702974e-07	0	0	0	0	9	0	0	20	0	11	0	8	19	14	29	36	Scaffold_2061	601274	626852	vipr1	IPR000832 GPCR, family 2, secretin-like;IPR015095 Alkylated DNA repair protein AlkB, homologue 8, N-terminal;IPR002284 GPCR, family 2, vasoactive intestinal peptide receptor 2;IPR017983 GPCR, family 2, secretin-like, conserved site;IPR017981 GPCR, family 2-like	go_component:GO:0016021 integral component of membrane;go_process:GO:0007186 G protein-coupled receptor signaling pathway;go_function:GO:0004930 G protein-coupled receptor activity;go_function:GO:0016706 2-oxoglutarate-dependent dioxygenase activity;go_function:GO:0008168 methyltransferase activity;go_function:GO:0004999 vasoactive intestinal polypeptide receptor activity;go_component:GO:0016020 …	GIP-R	NA	NA	Adra	Adra-UP g46529 vipr1	Adra-UP g46529
g38552	Adra	Cab	2.20245561529438	3.36332328489734	3.22250741779474e-09	7.93711071206143e-07	39	63	92	171	78	86	143	182	310	194	469	211	546	569	396	305	Scaffold_1751	7418480	7432032	enpp4	IPR002591 Type I phosphodiesterase/nucleotide pyrophosphatase/phosphate transferase;IPR017850 Alkaline-phosphatase-like, core domain superfamily	go_function:GO:0003824 catalytic activity	E-NPP 4	NA	NA	Adra	Adra-UP g38552 enpp4	Adra-UP g38552
g50491	Adra	Cab	5.57906566671895	-0.14269031326632	8.77902331834749e-09	1.95744496767617e-06	0	0	3	0	3	0	7	22	0	29	34	1	49	58	46	21	Scaffold_2203	591496	595996	NA	IPR004244 Transposase, L1	-	NA	NA	NA	Adra	Adra-UP g50491	Adra-UP g50491
g43975	Adra	Cab	2.86389003930342	1.37082347219922	1.0415368214584e-08	2.25120744409509e-06	6	7	14	36	111	66	130	308	14	141	14	19	127	172	86	104	Scaffold_1959	126197	143753	NA	IPR032071 Domain of unknown function DUF4806;IPR000477 Reverse transcriptase domain;IPR043502 DNA/RNA polymerase superfamily	-	NA	NA	NA	Adra	Adra-UP g43975	Adra-UP g43975
g68781	Adra	Cab	4.76707955739567	-0.300519738240069	1.18148146981489e-08	2.50261404936191e-06	0	0	2	3	83	36	32	103	155	100	42	69	13	50	39	62	Scaffold_2841	2345164	2347259	NA	IPR027806 Harbinger transposase-derived nuclease domain	-	NA	NA	NA	Adra	Adra-UP g68781	Adra-UP g68781
g43417	Adra	Cab	2.59169883479021	2.00518793180201	1.31975477539579e-08	2.76782630222116e-06	11	31	21	42	86	53	40	89	59	131	67	67	104	273	121	295	Scaffold_1934	796646	825491	acly	IPR003781 CoA-binding;IPR002020 Citrate synthase;IPR032263 ATP-citrate synthase, citrate-binding domain;IPR016143 Citrate synthase-like, small alpha subdomain;IPR016102 Succinyl-CoA synthetase-like;IPR005811 ATP-citrate lyase/succinyl-CoA ligase;IPR017866 Succinyl-CoA synthetase, beta subunit, conserved site;IPR017440 ATP-citrate lyase/succinyl-CoA ligase, active site;IPR033847 ATP-citrate lyase/…	go_function:GO:0046912 transferase activity, transferring acyl groups, acyl groups converted into alkyl on transfer;go_function:GO:0003824 catalytic activity	ATP-citrate (pro-S-)-lyase	NA	NA	Adra	Adra-UP g43417 acly	Adra-UP g43417
g25695	Adra	Cab	6.93512095371521	9.01449070699337	3.6848698290775e-08	6.96901006424282e-06	25	520	56	73	54	78	88	97	3467	3113	301	216	9845	78834	6771	34095	Scaffold_1133	3106392	3125324	atp4a	IPR004014 Cation-transporting P-type ATPase, N-terminal;IPR023214 HAD superfamily;IPR023299 P-type ATPase, cytoplasmic domain N;IPR005775 P-type ATPase subfamily IIC, subunit alpha;IPR006068 Cation-transporting P-type ATPase, C-terminal;IPR001757 P-type ATPase;IPR044492 P-type ATPase, haloacid dehalogenase domain;IPR018303 P-type ATPase, phosphorylation site;IPR023298 P-type ATPase, transmembrane…	go_function:GO:0000166 nucleotide binding;go_component:GO:0016021 integral component of membrane;go_process:GO:0006813 potassium ion transport;go_function:GO:0005524 ATP binding;go_function:GO:0008556 P-type potassium transmembrane transporter activity;go_function:GO:0016887 ATPase	Na(+)/K(+) ATPase alpha-1 subunit	NA	NA	Adra	Adra-UP g25695 atp4a	Adra-UP g25695
g26329	Adra	Cab	2.59895678987569	8.51112114445739	3.98289998225742e-08	7.46599888709529e-06	1033	3228	1863	3160	1482	447	964	4215	2353	1796	3281	1633	12291	9916	15566	33059	Scaffold_1152	5102748	5113840	hem1	IPR015118 5-aminolevulinate synthase presequence;IPR004839 Aminotransferase, class I/classII;IPR015422 Pyridoxal phosphate-dependent transferase, small domain;IPR015421 Pyridoxal phosphate-dependent transferase, major domain;IPR010961 Tetrapyrrole biosynthesis, 5-aminolevulinic acid synthase;IPR001917 Aminotransferase, class-II, pyridoxal-phosphate binding site;IPR015424 Pyridoxal phosphate-depen…	go_process:GO:0006778 porphyrin-containing compound metabolic process;go_function:GO:0003870 5-aminolevulinate synthase activity;go_function:GO:0030170 pyridoxal phosphate binding;go_component:GO:0005759 mitochondrial matrix;go_process:GO:0009058 biosynthetic process;go_function:GO:0003824 catalytic activity;go_process:GO:0033014 tetrapyrrole biosynthetic process;go_function:GO:0016740 transferas…	5-aminolevulinic acid synthase	NA	NA	Adra	Adra-UP g26329 hem1	Adra-UP g26329
g56487	Adra	Cab	8.59155678113137	-0.00397035670072617	2.63969486266549e-07	3.91007108957905e-05	0	0	0	0	0	0	0	0	0	0	0	0	22	32	128	11	Scaffold_2414	139291	177526	NA	IPR000569 HECT domain;IPR035983 HECT, E3 ligase catalytic domain	go_function:GO:0004842 ubiquitin-protein transferase activity	NA	NA	NA	Adra	Adra-UP g56487	Adra-UP g56487
g23481	Adra	Cab	3.67689919298877	0.396541302943239	4.23836433675645e-07	6.02530425377014e-05	0	1	10	9	58	22	27	138	107	110	35	24	28	83	90	60	Scaffold_1052	1927	4311	NA	IPR027806 Harbinger transposase-derived nuclease domain	-	NA	NA	NA	Adra	Adra-UP g23481	Adra-UP g23481
g99	Adra	Cab	4.53187937061437	1.76138397866731	4.71347986956905e-07	6.56848227613235e-05	0	0	16	18	16	15	21	27	33	18	17	16	106	201	105	329	Scaffold_1	1743961	1774285	al	IPR001356 Homeobox domain;IPR003654 OAR domain;IPR033203 Homeobox protein aristaless-like 4;IPR017970 Homeobox, conserved site;IPR009057 Homeobox-like domain superfamily	go_function:GO:0003677 DNA binding;go_process:GO:0006357 regulation of transcription by RNA polymerase II;go_process:GO:0007275 multicellular organism development;go_function:GO:0003700 DNA-binding transcription factor activity;go_process:GO:0006355 regulation of transcription, DNA-templated;go_function:GO:0000981 DNA-binding transcription factor activity, RNA polymerase II-specific	Homeobox protein goosecoid	NA	NA	Adra	Adra-UP g99 al	Adra-UP g99
g49254	Adra	Cab	2.24958765796363	1.39561178629051	6.93971670601827e-07	9.07389378190611e-05	3	23	26	41	66	33	20	72	154	166	110	84	100	147	98	130	Scaffold_2163	30408	54401	NA	IPR013783 Immunoglobulin-like fold;IPR036179 Immunoglobulin-like domain superfamily	-	NA	NA	NA	Adra	Adra-UP g49254	Adra-UP g49254
g28275	Adra	Cab	12.0904274157826	3.3755097379011	9.92956475032921e-07	0.000121110516287212	0	0	0	0	0	0	0	853	0	0	0	0	0	989	330	1281	Scaffold_1285	985013	998037	NA	IPR013106 Immunoglobulin V-set domain;IPR003599 Immunoglobulin subtype;IPR003598 Immunoglobulin subtype 2;IPR013783 Immunoglobulin-like fold;IPR013270 CD47 immunoglobulin-like;IPR007110 Immunoglobulin-like domain;IPR036179 Immunoglobulin-like domain superfamily	-	NA	NA	NA	Adra	Adra-UP g28275	Adra-UP g28275
g22359	Adra	Cab	7.32452233935772	-1.10397376526288	9.94864971861719e-07	0.000121110516287212	0	0	0	0	4	3	0	21	6	40	34	3	21	48	10	7	Scaffold_993	169079	170452	NA	NA	-	NA	NA	NA	Adra	Adra-UP g22359	Adra-UP g22359
g21924	Adra	Cab	3.62865783536602	3.09800730599202	1.25571728448876e-06	0.000145691350501104	0	34	32	81	0	218	85	0	0	395	0	0	297	530	507	437	Scaffold_955	327007	330092	NA	IPR003599 Immunoglobulin subtype;IPR013106 Immunoglobulin V-set domain;IPR013783 Immunoglobulin-like fold;IPR007110 Immunoglobulin-like domain;IPR036179 Immunoglobulin-like domain superfamily	-	NA	NA	NA	Adra	Adra-UP g21924	Adra-UP g21924
g13176	Adra	Cab	7.55375228586891	4.77391470487124	1.69979394815446e-06	0.000180025177049039	8	3	4	5	2527	3042	1866	3292	2932	4352	3404	3108	896	3310	2019	4	Scaffold_570	265148	265690	H1F1	IPR005819 Linker histone H1/H5;IPR005818 Linker histone H1/H5, domain H15;IPR036388 Winged helix-like DNA-binding domain superfamily;IPR036390 Winged helix DNA-binding domain superfamily	go_function:GO:0003677 DNA binding;go_component:GO:0000786 nucleosome;go_process:GO:0006334 nucleosome assembly	Histone H1a	NA	NA	Adra	Adra-UP g13176 H1F1	Adra-UP g13176
g7356	Adra	Cab	4.1569213210024	1.04367852966518	1.7161781634076e-06	0.00018085614854378	3	7	7	0	37	124	79	43	59	42	69	42	108	194	74	40	Scaffold_310	116342	129451	NA	IPR003879 Butyrophylin-like, SPRY domain;IPR006574 SPRY-associated;IPR000315 B-box-type zinc finger;IPR003877 SPRY domain;IPR001841 Zinc finger, RING-type;IPR027370 RING-type zinc-finger, LisH dimerisation motif;IPR043136 B30.2/SPRY domain superfamily;IPR013083 Zinc finger, RING/FYVE/PHD-type;IPR017907 Zinc finger, RING-type, conserved site;IPR001870 B30.2/SPRY domain;IPR013320 Concanavalin A-lik…	go_function:GO:0008270 zinc ion binding;go_function:GO:0005515 protein binding	NA	NA	NA	Adra	Adra-UP g7356	Adra-UP g7356
g12490	Adra	Cab	2.35371372925388	1.65431894923401	1.84461125363296e-06	0.000191532135168889	13	14	18	54	22	10	5	44	22	39	91	36	94	106	181	189	Scaffold_557	461998	475746	mGluR	IPR001458 GPCR, family 3, metabotropic glutamate receptor 2;IPR000337 GPCR, family 3;IPR000162 GPCR, family 3, metabotropic glutamate receptor;IPR017978 GPCR family 3, C-terminal;IPR038550 GPCR, family 3, nine cysteines domain superfamily;IPR001828 Receptor, ligand binding region;IPR011500 GPCR, family 3, nine cysteines domain;IPR017979 GPCR, family 3, conserved site;IPR028082 Periplasmic binding…	go_component:GO:0016021 integral component of membrane;go_process:GO:0007186 G protein-coupled receptor signaling pathway;go_function:GO:0004930 G protein-coupled receptor activity	Metabotropic glutamate receptor 3	NA	NA	Adra	Adra-UP g12490 mGluR	Adra-UP g12490
g63666	Adra	Cab	3.29301224803957	0.0502459531932841	2.11012744929777e-06	0.000209843754136269	0	2	11	6	30	25	28	118	86	83	43	11	32	61	66	34	Scaffold_2660	2085383	2093766	NA	IPR027806 Harbinger transposase-derived nuclease domain	-	NA	NA	NA	Adra	Adra-UP g63666	Adra-UP g63666
g15342	Adra	Cab	2.04937128271904	2.66059406397195	3.46749102627465e-06	0.000311222012366736	22	32	49	159	183	48	99	258	293	327	238	172	267	315	317	200	Scaffold_644	4193813	4209764	otol1	IPR002035 von Willebrand factor, type A;IPR008160 Collagen triple helix repeat;IPR036465 von Willebrand factor A-like domain superfamily	-	Alpha-2 type I collagen	NA	NA	Adra	Adra-UP g15342 otol1	Adra-UP g15342
g40969	Adra	Cab	8.64093044367073	0.0378143331602215	5.45983483261419e-06	0.000446525951445691	0	0	0	0	0	2	0	0	0	0	0	0	87	99	3	13	Scaffold_1871	3831	5369	NA	NA	NA	NA	NA	NA	Adra	Adra-UP g40969	Adra-UP g40969
g71752	Adra	Cab	3.23471855255899	3.27130645201189	6.30822007414132e-06	0.000506139081857808	9	20	69	119	45	22	23	97	75	74	92	25	164	155	589	1088	Scaffold_2977	1042762	1080742	mtgr1	IPR013289 CBFA2T family;IPR013290 Protein CBFA2T1;IPR003894 TAFH/NHR1;IPR002893 Zinc finger, MYND-type;IPR037249 TAFH/NHR1 domain superfamily;IPR014896 NHR2-like	go_function:GO:0003714 transcription corepressor activity;go_process:GO:0045892 negative regulation of transcription, DNA-templated;go_process:GO:0006351 transcription, DNA-templated	MTG8-like protein	NA	NA	Adra	Adra-UP g71752 mtgr1	Adra-UP g71752
g12222	Adra	Cab	3.57500175055014	-0.0223107954561394	6.93829485131018e-06	0.000546345581934767	2	0	4	8	10	13	13	15	52	46	41	21	52	77	22	34	Scaffold_544	315295	316968	NA	IPR001304 C-type lectin-like;IPR000742 EGF-like domain;IPR001881 EGF-like calcium-binding domain;IPR026823 Complement Clr-like EGF domain;IPR016186 C-type lectin-like/link domain superfamily;IPR018097 EGF-like calcium-binding, conserved site;IPR000152 EGF-type aspartate/asparagine hydroxylation site;IPR009030 Growth factor receptor cysteine-rich domain superfamily;IPR016187 C-type lectin fold	go_function:GO:0005509 calcium ion binding	NA	NA	NA	Adra	Adra-UP g12222	Adra-UP g12222
g10707	Adra	Cab	3.1527979261485	-0.00809289221761785	7.34449637237311e-06	0.000571952654998556	0	4	10	5	28	22	18	96	129	106	45	8	24	61	65	35	Scaffold_459	3473145	3477068	NA	IPR027806 Harbinger transposase-derived nuclease domain	-	NA	NA	NA	Adra	Adra-UP g10707	Adra-UP g10707
g19134	Adra	Cab	10.2602950226948	1.57682371839447	8.27438590465848e-06	0.000628200868216759	0	0	0	0	112	15	201	170	152	347	244	172	102	0	236	292	Scaffold_790	4685	23374	NA	IPR029495 NACHT-associated domain;IPR041075 NOD2, winged helix domain;IPR036388 Winged helix-like DNA-binding domain superfamily;IPR032675 Leucine-rich repeat domain superfamily;IPR001611 Leucine-rich repeat;IPR007111 NACHT nucleoside triphosphatase;IPR041267 NACHT, LRR and PYD domains-containing protein, helical domain HD2;IPR009057 Homeobox-like domain superfamily	go_function:GO:0005515 protein binding	NA	NA	NA	Adra	Adra-UP g19134	Adra-UP g19134
g70893	Adra	Cab	7.47931009923051	4.72274049892835	9.24403391101124e-06	0.000684640301758882	0	22	0	0	780	0	15	68	2524	2620	82	1830	774	2825	1844	610	Scaffold_2935	69359	70904	NA	IPR013106 Immunoglobulin V-set domain;IPR003599 Immunoglobulin subtype;IPR013783 Immunoglobulin-like fold;IPR007110 Immunoglobulin-like domain;IPR036179 Immunoglobulin-like domain superfamily	-	NA	NA	NA	Adra	Adra-UP g70893	Adra-UP g70893
g56427	Adra	Cab	4.10708831159162	0.563822916578079	1.23417877109975e-05	0.000867126934524351	0	0	8	10	62	14	46	51	24	50	12	12	30	137	103	34	Scaffold_2409	1190391	1200338	GNAO1	IPR001019 Guanine nucleotide binding protein (G-protein), alpha subunit;IPR001408 G-protein alpha subunit, group I;IPR038717 Tc1-like transposase, DDE domain;IPR011025 G protein alpha subunit, helical insertion;IPR027417 P-loop containing nucleoside triphosphate hydrolase	go_process:GO:0007186 G protein-coupled receptor signaling pathway;go_function:GO:0019001 guanyl nucleotide binding;go_function:GO:0031683 G-protein beta/gamma-subunit complex binding;go_function:GO:0003924 GTPase activity;go_function:GO:0005525 GTP binding;go_process:GO:0007188 adenylate cyclase-modulating G protein-coupled receptor signaling pathway;go_process:GO:0007165 signal transduction	Guanine nucleotide-binding protein G(o) subunit alpha	Guanine nucleotide-binding protein G(o) subunit alpha	hyperosmotic response; negative regulation of renal sodium excretion; positive regulation of renal sodium excretion; negative regulation of blood pressure; positive regulation of urine volume; positive regulation of sodium ion transport; negative regulation of potassium ion transport	Adra	Adra-UP g56427 GNAO1	Adra-UP g56427 Guanine nucleotide-binding protein G(o) subunit alpha
g24760	Adra	Cab	2.30405335615302	4.28007820031857	1.30312255909369e-05	0.000907984935747451	47	181	97	331	527	115	55	265	275	151	284	723	795	366	1185	1117	Scaffold_1110	4635767	4648192	myo3	IPR001609 Myosin head, motor domain;IPR014751 DNA repair protein XRCC4-like, C-terminal;IPR004009 Myosin, N-terminal, SH3-like;IPR036961 Kinesin motor domain superfamily;IPR008989 Myosin S1 fragment, N-terminal;IPR002928 Myosin tail;IPR000048 IQ motif, EF-hand binding site;IPR027417 P-loop containing nucleoside triphosphate hydrolase	go_function:GO:0003774 motor activity;go_function:GO:0005524 ATP binding;go_component:GO:0016459 myosin complex;go_function:GO:0051015 actin filament binding;go_function:GO:0005515 protein binding	MyHC-beta	NA	NA	Adra	Adra-UP g24760 myo3	Adra-UP g24760
g14360	Adra	Cab	-12.4097013651651	3.68096207149487	5.32849007289303e-74	1.1286807672402e-69	267	611	825	701	582	552	423	748	616	691	808	539	0	0	0	0	Scaffold_625	2344466	2348305	NA	IPR033214 A-kinase-interacting protein 1	go_process:GO:1901222 regulation of NIK/NF-kappaB signaling	NA	NA	NA	Cab	Cab-UP g14360	Cab-UP g14360
g10729	Adra	Cab	-12.9022055725617	4.17315233621304	1.06670746278014e-45	1.12974987383045e-41	165	927	1669	1049	2493	1604	424	2739	0	0	0	0	0	0	0	0	Scaffold_461	78458	105936	DCTD	IPR002125 Cytidine and deoxycytidylate deaminase domain;IPR015517 Deoxycytidylate deaminase-related;IPR016192 APOBEC/CMP deaminase, zinc-binding;IPR035105 Deoxycytidylate deaminase domain;IPR016193 Cytidine deaminase-like	go_function:GO:0016787 hydrolase activity;go_function:GO:0008270 zinc ion binding;go_function:GO:0003824 catalytic activity	dCMP deaminase	NA	NA	Cab	Cab-UP g10729 DCTD	Cab-UP g10729
g54554	Adra	Cab	-10.5060601082429	5.85244777771477	1.05732956754428e-43	7.46545163324096e-40	571	1751	3859	7304	1566	11	0	0	0	0	3	0	3	0	5	0	Scaffold_2352	35338	39651	NA	IPR008803 RHD3/Sey1;IPR030383 Very large inducible GTPASE (VLIG)-type guanine nucleotide-binding (G) domain;IPR027417 P-loop containing nucleoside triphosphate hydrolase	go_function:GO:0005525 GTP binding	NA	NA	NA	Cab	Cab-UP g54554	Cab-UP g54554
g27701	Adra	Cab	-4.70421244849898	5.0646337428962	6.7520237143838e-33	3.57553415795194e-29	553	1435	1771	2746	2193	974	271	1030	272	613	982	343	35	68	47	139	Scaffold_1269	136586	138531	NA	NA	-	NA	NA	NA	Cab	Cab-UP g27701	Cab-UP g27701
g45661	Adra	Cab	-7.93084787449838	2.33288817409278	2.50903710445959e-29	9.38265659081724e-26	61	175	453	396	7	8	0	0	0	0	0	0	0	0	4	0	Scaffold_2031	262636	264018	NA	NA	-	NA	NA	NA	Cab	Cab-UP g45661	Cab-UP g45661
g46238	Adra	Cab	-10.1195273005727	1.40356752343049	7.56820831008523e-26	2.00387235530282e-22	68	98	196	118	107	67	60	205	0	1	0	0	0	0	0	0	Scaffold_2052	924648	925652	NA	IPR043636 L1 transposable element, RRM domain;IPR004244 Transposase, L1	-	NA	NA	NA	Cab	Cab-UP g46238	Cab-UP g46238
g63311	Adra	Cab	-10.0959555583723	1.3803286140696	1.60073207325923e-25	3.76741186397523e-22	67	95	195	116	105	67	59	199	0	1	0	0	0	0	0	0	Scaffold_2647	129804	130808	NA	IPR043636 L1 transposable element, RRM domain;IPR004244 Transposase, L1	-	NA	NA	NA	Cab	Cab-UP g63311	Cab-UP g63311
g60493	Adra	Cab	-10.3424732165275	1.63527975183341	4.82588840138902e-25	1.02221968118222e-21	47	65	268	302	24	83	62	24	72	0	52	49	0	0	0	0	Scaffold_2553	34779	36462	NA	IPR003598 Immunoglobulin subtype 2;IPR013106 Immunoglobulin V-set domain;IPR003599 Immunoglobulin subtype;IPR013783 Immunoglobulin-like fold;IPR007110 Immunoglobulin-like domain;IPR036179 Immunoglobulin-like domain superfamily	-	NA	NA	NA	Cab	Cab-UP g60493	Cab-UP g60493
g61117	Adra	Cab	-2.35934196987694	4.40135741336159	6.4618647258264e-25	1.24432016929504e-21	375	551	1299	1331	1139	550	232	614	388	837	1547	538	146	236	204	188	Scaffold_2572	243002	257606	NA	IPR030383 Very large inducible GTPASE (VLIG)-type guanine nucleotide-binding (G) domain;IPR027417 P-loop containing nucleoside triphosphate hydrolase	go_function:GO:0005525 GTP binding	NA	NA	NA	Cab	Cab-UP g61117	Cab-UP g61117
g31829	Adra	Cab	-10.0558231367541	1.33944972145112	1.54204278176244e-24	2.56448031607872e-21	68	92	184	110	100	64	59	199	0	1	0	0	0	0	0	0	Scaffold_1412	2844153	2845157	NA	IPR043636 L1 transposable element, RRM domain;IPR004244 Transposase, L1	-	NA	NA	NA	Cab	Cab-UP g31829	Cab-UP g31829
g51708	Adra	Cab	-10.0251604347056	1.30994895683203	1.57389501034007e-24	2.56448031607872e-21	65	90	184	109	101	64	58	199	0	1	0	0	0	0	0	0	Scaffold_2255	163466	164470	NA	IPR043636 L1 transposable element, RRM domain;IPR004244 Transposase, L1	-	NA	NA	NA	Cab	Cab-UP g51708	Cab-UP g51708
g8903	Adra	Cab	-9.96329974584318	1.2469335502005	5.07680839027339e-23	7.1691303548514e-20	65	90	167	98	103	62	58	196	0	1	0	0	0	0	0	0	Scaffold_364	2677084	2678088	NA	IPR043636 L1 transposable element, RRM domain;IPR004244 Transposase, L1	-	NA	NA	NA	Cab	Cab-UP g8903	Cab-UP g8903
g61150	Adra	Cab	-9.84710881671354	1.13146362726298	1.72953510600268e-21	2.15500074207935e-18	61	83	154	87	128	81	67	253	0	1	0	0	0	0	0	0	Scaffold_2572	616246	617205	NA	IPR043636 L1 transposable element, RRM domain;IPR004244 Transposase, L1	-	NA	NA	NA	Cab	Cab-UP g61150	Cab-UP g61150
g36383	Adra	Cab	-3.88043307256953	3.91570079887998	5.07501994001636e-21	5.97217068719036e-18	210	411	1625	783	106	331	249	284	220	164	495	143	38	80	36	67	Scaffold_1663	296849	313020	GALT	IPR003859 Beta-1,4-galactosyltransferase;IPR027791 Galactosyltransferase, C-terminal;IPR027995 Galactosyltransferase, N-terminal;IPR029044 Nucleotide-diphospho-sugar transferases	go_function:GO:0016757 transferase activity, transferring glycosyl groups;go_process:GO:0005975 carbohydrate metabolic process	N-acetyllactosamine synthase	NA	NA	Cab	Cab-UP g36383 GALT	Cab-UP g36383
g41061	Adra	Cab	-6.69368676666857	4.56808815810712	3.33631337451982e-19	3.53348949495394e-16	634	713	274	2953	335	130	53	145	554	353	477	482	7	20	12	13	Scaffold_1873	269341	273806	SIAT4	IPR038578 GT29-like superfamiliy;IPR001675 Glycosyl transferase family 29	go_function:GO:0008373 sialyltransferase activity;go_process:GO:0006486 protein glycosylation	Gal-NAc6S	NA	NA	Cab	Cab-UP g41061 SIAT4	Cab-UP g41061
g35068	Adra	Cab	-3.94560271526936	7.98103086036154	6.39678502029126e-17	6.15894092271861e-14	8327	7464	7990	16335	1419	611	342	1152	3147	2630	3157	3641	719	1538	466	843	Scaffold_1590	435196	438361	rush	IPR001849 Pleckstrin homology domain;IPR000306 FYVE zinc finger;IPR015095 Alkylated DNA repair protein AlkB, homologue 8, N-terminal;IPR013083 Zinc finger, RING/FYVE/PHD-type;IPR011993 PH-like domain superfamily;IPR017455 Zinc finger, FYVE-related;IPR011011 Zinc finger, FYVE/PHD-type	go_function:GO:0046872 metal ion binding;go_function:GO:0016706 2-oxoglutarate-dependent dioxygenase activity;go_function:GO:0008168 methyltransferase activity	PH domain-containing family F member 2	NA	NA	Cab	Cab-UP g35068 rush	Cab-UP g35068
g48286	Adra	Cab	-3.27794459514869	4.16346863984802	3.49441133804815e-16	3.08410920677233e-13	446	377	978	1347	473	529	416	394	1140	910	1230	541	79	69	134	80	Scaffold_2121	496167	502480	BTF2	IPR003879 Butyrophylin-like, SPRY domain;IPR003877 SPRY domain;IPR000315 B-box-type zinc finger;IPR006574 SPRY-associated;IPR001841 Zinc finger, RING-type;IPR003613 U box domain;IPR043136 B30.2/SPRY domain superfamily;IPR013083 Zinc finger, RING/FYVE/PHD-type;IPR018957 Zinc finger, C3HC4 RING-type;IPR017907 Zinc finger, RING-type, conserved site;IPR001870 B30.2/SPRY domain;IPR013320 Concanavalin …	go_function:GO:0005515 protein binding;go_function:GO:0008270 zinc ion binding;go_function:GO:0004842 ubiquitin-protein transferase activity;go_process:GO:0016567 protein ubiquitination;go_function:GO:0046872 metal ion binding	BT	NA	NA	Cab	Cab-UP g48286 BTF2	Cab-UP g48286
g32532	Adra	Cab	-6.56174389377201	1.75822381285597	5.25071821893497e-16	4.44882853253922e-13	90	128	191	196	93	85	103	105	39	43	28	40	0	8	0	0	Scaffold_1437	580498	586785	NA	IPR041373 Reverse transcriptase, RNase H-like domain;IPR041588 Integrase zinc-binding domain;IPR043502 DNA/RNA polymerase superfamily	-	NA	NA	NA	Cab	Cab-UP g32532	Cab-UP g32532
g32533	Adra	Cab	-9.15581241104347	0.463490364761159	1.22452246013099e-15	9.60660546314617e-13	31	58	40	127	63	34	33	37	15	17	10	22	0	0	0	0	Scaffold_1437	587116	595882	FTHFD	NA	-	10-FTHFDH	NA	NA	Cab	Cab-UP g32533 FTHFD	Cab-UP g32533
g16377	Adra	Cab	-7.92787758497723	2.63716933247024	1.92030590976637e-15	1.45271142073826e-12	120	289	607	143	677	69	0	0	13	31	0	0	0	0	5	0	Scaffold_691	596847	601944	GRHPR	IPR006140 D-isomer specific 2-hydroxyacid dehydrogenase, NAD-binding domain;IPR006139 D-isomer specific 2-hydroxyacid dehydrogenase, catalytic domain;IPR029752 D-isomer specific 2-hydroxyacid dehydrogenase, NAD-binding domain conserved site 1;IPR029753 D-isomer specific 2-hydroxyacid dehydrogenase, NAD-binding domain conserved site;IPR036291 NAD(P)-binding domain superfamily	go_function:GO:0051287 NAD binding;go_function:GO:0016616 oxidoreductase activity, acting on the CH-OH group of donors, NAD or NADP as acceptor	Glyoxylate reductase/hydroxypyruvate reductase	NA	NA	Cab	Cab-UP g16377 GRHPR	Cab-UP g16377
g48788	Adra	Cab	-5.95639276817458	3.88481671015094	7.93586501088938e-15	5.6032497553553e-12	77	623	719	1993	1978	75	49	29	67	120	422	86	5	33	7	11	Scaffold_2134	442767	457307	des	IPR039008 Intermediate filament, rod domain;IPR018039 Intermediate filament protein, conserved site	-	Desmin	NA	NA	Cab	Cab-UP g48788 des	Cab-UP g48788
g27696	Adra	Cab	-2.1106793667215	4.47368022687742	1.24652531396797e-14	8.51738683886112e-12	451	750	1025	1083	596	594	162	772	450	695	731	447	130	362	202	279	Scaffold_1269	19569	69783	NA	NA	-	NA	NA	NA	Cab	Cab-UP g27696	Cab-UP g27696
g36649	Adra	Cab	-2.76650059781788	9.28380679294273	3.71194266310209e-14	2.38261725726753e-11	15742	18440	20639	44457	14818	9425	7005	10488	14039	20021	19991	13923	2682	5327	3377	7227	Scaffold_1663	6408767	6424145	ZG16	IPR001229 Jacalin-like lectin domain;IPR036404 Jacalin-like lectin domain superfamily	-	Secretory lectin ZG16	NA	NA	Cab	Cab-UP g36649 ZG16	Cab-UP g36649
g48281	Adra	Cab	-8.96384407552872	0.252475181399271	7.93858499676417e-14	4.80443164004168e-11	44	29	52	76	51	50	27	30	47	31	46	16	0	0	0	0	Scaffold_2121	450665	462737	NA	NA	-	NA	NA	NA	Cab	Cab-UP g48281	Cab-UP g48281
g1283	Adra	Cab	-3.32613067890239	5.11189502867409	1.33189775046871e-13	7.83673837511894e-11	503	2236	1741	1158	657	373	328	1203	946	1495	2434	729	160	180	119	245	Scaffold_75	1920500	1921055	NA	NA	NA	NA	NA	NA	Cab	Cab-UP g1283	Cab-UP g1283
g61837	Adra	Cab	-2.60394858346328	9.61329150243925	7.15020052723418e-12	3.44217153563351e-09	21336	22446	25993	48398	18598	18552	10669	15717	30312	37356	45385	24864	3659	9547	4222	8635	Scaffold_2599	1414657	1429680	NA	IPR001916 Glycoside hydrolase, family 22;IPR019799 Glycoside hydrolase family 22 domain;IPR023346 Lysozyme-like domain superfamily	-	NA	NA	NA	Cab	Cab-UP g61837	Cab-UP g61837
g19407	Adra	Cab	-4.58379659665937	2.34711677373088	9.11493267320148e-12	4.10792561454795e-09	128	139	330	332	81	0	0	28	15	0	27	0	8	21	16	0	Scaffold_804	773243	784906	NA	NA	-	NA	NA	NA	Cab	Cab-UP g19407	Cab-UP g19407
g35987	Adra	Cab	-2.92525168937989	5.18463006440915	2.2868007632835e-11	9.68780275357423e-09	587	1906	2261	1116	1799	512	324	977	654	1436	1444	851	179	389	249	141	Scaffold_1639	1	2646	NA	NA	NA	NA	NA	NA	Cab	Cab-UP g35987	Cab-UP g35987
g35929	Adra	Cab	-3.32436602478226	0.990549750963586	2.90727035918233e-11	1.18426539900385e-08	31	87	85	144	13	59	21	132	7	27	19	3	6	10	14	9	Scaffold_1635	38872	45448	NA	NA	-	NA	NA	NA	Cab	Cab-UP g35929	Cab-UP g35929
g34957	Adra	Cab	-2.598465248108	5.5227778877696	4.5644514405364e-11	1.75789473478985e-08	717	2093	2592	2080	187	273	382	638	417	447	624	409	205	761	190	407	Scaffold_1586	494249	520442	NA	IPR003599 Immunoglobulin subtype;IPR013783 Immunoglobulin-like fold;IPR007110 Immunoglobulin-like domain;IPR036179 Immunoglobulin-like domain superfamily;IPR027417 P-loop containing nucleoside triphosphate hydrolase	-	NA	NA	NA	Cab	Cab-UP g34957	Cab-UP g34957
g13654	Adra	Cab	-2.94728267802132	10.788910097572	6.64228538554054e-11	2.46836647432491e-08	47951	47118	41910	150233	56981	37739	19043	17200	43137	56529	47413	19972	7791	16341	13168	8719	Scaffold_605	3888994	3908518	LPO	IPR001073 C1q domain;IPR019791 Haem peroxidase, animal-type;IPR008983 Tumour necrosis factor-like domain superfamily;IPR037120 Haem peroxidase domain superfamily, animal type;IPR029599 Eosinophil peroxidase;IPR010255 Haem peroxidase superfamily	go_function:GO:0005515 protein binding;go_process:GO:0006952 defense response;go_function:GO:0004601 peroxidase activity;go_process:GO:0006979 response to oxidative stress;go_function:GO:0020037 heme binding	Lactoperoxidase	NA	NA	Cab	Cab-UP g13654 LPO	Cab-UP g13654
g47247	Adra	Cab	-4.28910751432375	2.88941796961166	6.88356103768784e-11	2.51392396379834e-08	214	263	520	208	204	187	132	284	148	211	178	108	31	20	5	21	Scaffold_2077	1161299	1161793	NA	NA	NA	NA	NA	NA	Cab	Cab-UP g47247	Cab-UP g47247
g47552	Adra	Cab	-2.36512502649871	3.06528157283639	9.13168251890292e-11	3.22378831859003e-08	177	170	372	673	193	180	32	35	44	79	64	125	75	67	75	79	Scaffold_2086	1111506	1130224	kif8	IPR001752 Kinesin motor domain;IPR036961 Kinesin motor domain superfamily;IPR022140 Kinesin-like KIF1-type;IPR027640 Kinesin-like protein;IPR027417 P-loop containing nucleoside triphosphate hydrolase;IPR008984 SMAD/FHA domain superfamily	go_function:GO:0008017 microtubule binding;go_process:GO:0007018 microtubule-based movement;go_function:GO:0005524 ATP binding;go_function:GO:1990939 ATP-dependent microtubule motor activity;go_function:GO:0005515 protein binding	Kinesin-like protein KIF1B	NA	NA	Cab	Cab-UP g47552 kif8	Cab-UP g47552
g1284	Adra	Cab	-2.53983194045419	5.78814821290023	9.38340676596599e-11	3.25834954289658e-08	985	2907	2569	1814	1421	1434	1118	1971	1474	2143	2962	1280	243	496	410	734	Scaffold_75	1930790	1965104	NA	IPR036048 Chemokine interleukin-8-like superfamily	go_component:GO:0005576 extracellular region;go_process:GO:0006955 immune response;go_function:GO:0008009 chemokine activity	NA	NA	NA	Cab	Cab-UP g1284	Cab-UP g1284
g146	Adra	Cab	-6.00333968903097	8.12752642561118	1.80827374512214e-10	5.98482101080892e-08	8574	4625	5024	35722	3548	3381	1056	848	7604	4201	1813	4052	195	646	45	144	Scaffold_1	2796940	2805210	NA	IPR043159 D-galactoside/L-rhamnose binding SUEL lectin domain superfamily;IPR000922 D-galactoside/L-rhamnose binding SUEL lectin domain	go_function:GO:0030246 carbohydrate binding	L-rhamnose-binding lectin CSL2	NA	NA	Cab	Cab-UP g146	Cab-UP g146
g42298	Adra	Cab	-2.40465592939715	1.76105873860474	4.38897568803845e-10	1.36716592682398e-07	59	137	175	156	64	18	33	146	70	73	104	63	24	41	30	24	Scaffold_1904	7198823	7222142	NA	NA	-	NA	NA	NA	Cab	Cab-UP g42298	Cab-UP g42298
g8037	Adra	Cab	-2.66860485798213	1.50496705888258	6.00770780631433e-10	1.84427922830942e-07	40	132	163	128	56	75	37	116	38	18	32	24	17	28	15	26	Scaffold_338	1906308	1912936	NA	NA	-	NA	NA	NA	Cab	Cab-UP g8037	Cab-UP g8037
g54678	Adra	Cab	-3.33845006428886	2.15608549934103	7.23452949869261e-10	2.18916862630439e-07	39	273	254	226	143	115	53	95	52	153	228	136	21	22	28	15	Scaffold_2355	102920	136960	NA	NA	-	NA	NA	NA	Cab	Cab-UP g54678	Cab-UP g54678
g13621	Adra	Cab	-2.51838536499512	1.82005025244121	7.47643998761292e-10	2.23050636362841e-07	69	131	188	165	16	49	44	84	151	52	20	90	16	42	18	45	Scaffold_605	3009510	3010577	c3ar1	IPR000276 G protein-coupled receptor, rhodopsin-like;IPR000826 Formyl peptide receptor-related;IPR002258 Chemokine-like receptor 1;IPR017452 GPCR, rhodopsin-like, 7TM	go_component:GO:0016021 integral component of membrane;go_process:GO:0007186 G protein-coupled receptor signaling pathway;go_function:GO:0004930 G protein-coupled receptor activity	Chemokine-like receptor 1	NA	NA	Cab	Cab-UP g13621 c3ar1	Cab-UP g13621
g52003	Adra	Cab	-4.7777213719763	1.72190943537288	7.7052660682569e-10	2.26684647024747e-07	15	246	237	124	220	155	39	85	52	168	311	116	6	7	5	7	Scaffold_2264	123501	136212	NA	NA	-	NA	NA	NA	Cab	Cab-UP g52003	Cab-UP g52003
g36648	Adra	Cab	-2.9045631785952	8.43477472679727	1.07886367964125e-09	3.13047814550149e-07	9860	10098	6415	27563	6362	3144	2616	4832	10429	14687	14841	7378	1436	3658	1770	2658	Scaffold_1663	6401432	6404457	NA	IPR001229 Jacalin-like lectin domain;IPR036404 Jacalin-like lectin domain superfamily	-	NA	NA	NA	Cab	Cab-UP g36648	Cab-UP g36648
g12137	Adra	Cab	-3.09769824517676	4.34944827968847	1.49263499375362e-09	4.16013084706436e-07	301	1361	1065	451	660	690	420	553	302	1109	447	262	83	184	101	122	Scaffold_537	15197	27470	NA	IPR003599 Immunoglobulin subtype;IPR013106 Immunoglobulin V-set domain;IPR013783 Immunoglobulin-like fold;IPR007110 Immunoglobulin-like domain;IPR036179 Immunoglobulin-like domain superfamily	-	NA	NA	NA	Cab	Cab-UP g12137	Cab-UP g12137
g28324	Adra	Cab	-4.21473603905591	2.9791118210629	1.88013146229799e-09	4.9781180792995e-07	56	500	683	255	63	2350	820	189	62	27	11	18	13	35	7	40	Scaffold_1286	779208	814795	tsc	IPR002948 Thiazide-sensitive Na-K-Cl co-transporter;IPR013612 Amino acid permease, N-terminal;IPR004841 Amino acid permease/ SLC12A domain;IPR018491 SLC12A transporter, C-terminal	go_process:GO:0006811 ion transport;go_component:GO:0016020 membrane;go_process:GO:0055085 transmembrane transport;go_function:GO:0022857 transmembrane transporter activity	Bumetanide-sensitive sodium-(potassium)-chloride cotransporter 2	Bumetanide-sensitive sodium-(potassium)-chloride cotransporter 2	cellular hyperosmotic salinity response; potassium, sodium and chloride transmembrane ion transport; cellular ion homeostasis; cell volume homeostasis; hyperosmotic response	Cab	Cab-UP g28324 tsc	Cab-UP g28324 Bumetanide-sensitive sodium-(potassium)-chloride cotransporter 2
g4752	Adra	Cab	-5.46430043827249	4.19709423270569	3.86639973743517e-09	9.30659991344906e-07	64	1402	1890	209	112	8114	3211	295	117	61	47	72	18	21	23	28	Scaffold_203	3128934	3134364	DIA4	IPR029039 Flavoprotein-like superfamily;IPR003680 Flavodoxin-like fold	-	Azoreductase	NA	NA	Cab	Cab-UP g4752 DIA4	Cab-UP g4752
g42532	Adra	Cab	-2.29018938309585	1.87419397913673	5.47003362193716e-09	1.27325551846014e-06	39	105	257	248	123	79	12	245	435	504	384	190	25	35	41	36	Scaffold_1906	3041679	3044706	NA	NA	-	NA	NA	NA	Cab	Cab-UP g42532	Cab-UP g42532
g17231	Adra	Cab	-3.00406438258769	3.46049367490901	5.91795087342093e-09	1.3625438630522e-06	144	527	996	216	518	281	199	271	146	207	326	168	50	81	70	73	Scaffold_716	1186947	1195650	NA	IPR001811 Chemokine interleukin-8-like domain;IPR039809 Chemokine beta/gamma/delta;IPR036048 Chemokine interleukin-8-like superfamily	go_component:GO:0005576 extracellular region;go_process:GO:0006955 immune response;go_function:GO:0008009 chemokine activity	NA	NA	NA	Cab	Cab-UP g17231	Cab-UP g17231
g13046	Adra	Cab	-2.97378570983758	1.15771239206217	8.3717292418443e-09	1.88648902979517e-06	34	86	169	92	88	79	92	264	46	38	24	190	7	27	13	10	Scaffold_568	2249691	2259737	CALP	IPR002048 EF-hand domain;IPR028846 Recoverin family;IPR018247 EF-Hand 1, calcium-binding site;IPR011992 EF-hand domain pair	go_function:GO:0005509 calcium ion binding	KChIP4	NA	NA	Cab	Cab-UP g13046 CALP	Cab-UP g13046
g35782	Adra	Cab	-2.66167971091922	9.41972476882758	9.13395146503196e-09	2.0153683326282e-06	13253	24676	44686	28596	14646	11760	8156	16614	15592	4964	13964	4990	5589	8695	4399	1975	Scaffold_1620	5616822	5617249	NA	IPR001480 Bulb-type lectin domain;IPR036426 Bulb-type lectin domain superfamily	-	NA	NA	NA	Cab	Cab-UP g35782	Cab-UP g35782
g41064	Adra	Cab	-3.6973607777413	4.53397536184559	1.33532071042465e-08	2.77301600864852e-06	494	733	421	2668	248	174	113	289	196	157	587	276	55	144	141	32	Scaffold_1873	307310	341034	SIAT4	IPR038578 GT29-like superfamiliy;IPR001675 Glycosyl transferase family 29	go_function:GO:0008373 sialyltransferase activity;go_process:GO:0006486 protein glycosylation	Gal-NAc6S	NA	NA	Cab	Cab-UP g41064 SIAT4	Cab-UP g41064
g40436	Adra	Cab	-5.82014632210497	0.728267874341719	1.65493468596969e-08	3.33855490649618e-06	19	31	131	183	9	17	0	12	0	0	10	19	0	0	0	6	Scaffold_1847	458584	472756	tilB	NA	-	Leucine-rich repeat-containing protein 6	NA	NA	Cab	Cab-UP g40436 tilB	Cab-UP g40436
g25169	Adra	Cab	-2.60230585681409	3.01707371595684	2.73222861605784e-08	5.27361557148069e-06	130	457	331	314	174	29	59	134	81	80	60	92	50	108	63	37	Scaffold_1126	2715101	2715945	NA	IPR003597 Immunoglobulin C1-set;IPR013783 Immunoglobulin-like fold;IPR003006 Immunoglobulin/major histocompatibility complex, conserved site;IPR007110 Immunoglobulin-like domain;IPR036179 Immunoglobulin-like domain superfamily	-	NA	NA	NA	Cab	Cab-UP g25169	Cab-UP g25169
g67511	Adra	Cab	-2.876215340639	5.11676280033133	2.73863522265545e-08	5.27361557148069e-06	348	1872	2311	1528	1398	857	345	862	884	1623	2520	794	86	544	155	230	Scaffold_2806	11329	20226	NA	IPR006073 GTP binding domain;IPR027417 P-loop containing nucleoside triphosphate hydrolase	go_function:GO:0005525 GTP binding	NA	NA	NA	Cab	Cab-UP g67511	Cab-UP g67511
g8885	Adra	Cab	-2.35210849485374	3.43091609193911	5.43767265630603e-08	9.84451129964737e-06	159	499	276	801	354	139	88	192	156	152	125	136	60	182	67	105	Scaffold_364	2395902	2404046	NA	IPR013106 Immunoglobulin V-set domain;IPR003598 Immunoglobulin subtype 2;IPR003599 Immunoglobulin subtype;IPR013783 Immunoglobulin-like fold;IPR042474 Cell surface A33 antigen;IPR007110 Immunoglobulin-like domain;IPR036179 Immunoglobulin-like domain superfamily	go_component:GO:0005887 integral component of plasma membrane	NA	NA	NA	Cab	Cab-UP g8885	Cab-UP g8885
g39567	Adra	Cab	-2.66397433511066	4.36531035514898	5.58087254553315e-08	9.93395313104901e-06	214	1118	1615	488	140	3707	1357	349	181	179	109	140	135	139	144	206	Scaffold_1803	763244	780642	cfaD	IPR000668 Peptidase C1A, papain C-terminal;IPR013201 Cathepsin propeptide inhibitor domain (I29);IPR000169 Cysteine peptidase, cysteine active site;IPR025660 Cysteine peptidase, histidine active site;IPR025661 Cysteine peptidase, asparagine active site;IPR039417 Papain-like cysteine endopeptidase;IPR038765 Papain-like cysteine peptidase superfamily	go_process:GO:0006508 proteolysis;go_function:GO:0008234 cysteine-type peptidase activity	Cathepsin L heavy chain	Cathepsin L heavy chain	response to osmotic stress; positive regulation of cation channel activity	Cab	Cab-UP g39567 cfaD	Cab-UP g39567 Cathepsin L heavy chain
g35005	Adra	Cab	-4.47310404416331	-0.48989110436556	5.90398050329116e-08	1.04215095850594e-05	8	22	58	45	5	322	88	19	18	0	17	5	0	4	2	0	Scaffold_1587	624600	637611	abpA	IPR001715 Calponin homology domain;IPR036872 CH domain superfamily;IPR022735 bMERB domain	go_function:GO:0005515 protein binding	F-actin cross-linking protein	F-actin cross-linking protein	hyperosmotic response; positive regulation of sodium; negative regulation of potassium ion transport; positive regulation of potassium ion transport; bicellular tight junction assembly; negative regulation of potassium ion transmembrane transporter activity; positive regulation of potassium ion transmembrane transporter activity; protein localization to bicellular tight junction; positive regulat…	Cab	Cab-UP g35005 abpA	Cab-UP g35005 F-actin cross-linking protein
g41390	Adra	Cab	-6.74111842517997	3.51811600055932	8.04064349425212e-08	1.38469032922966e-05	4	749	1464	223	88	3448	2786	292	83	12	8	0	3	8	5	8	Scaffold_1879	6694449	6695182	NA	NA	-	NA	NA	NA	Cab	Cab-UP g41390	Cab-UP g41390
g3941	Adra	Cab	-6.98347373910153	3.59134913072411	8.26910041347355e-08	1.41254907224352e-05	4	414	2056	388	152	5452	4204	674	220	36	7	13	7	6	2	5	Scaffold_170	88579	89246	NA	IPR009803 Protein of unknown function DUF1373	-	NA	NA	NA	Cab	Cab-UP g3941	Cab-UP g3941
g24015	Adra	Cab	-2.2717193551707	1.35189142070582	8.82650478057215e-08	1.49570419409663e-05	54	64	111	171	58	37	51	87	18	41	31	39	20	20	20	36	Scaffold_1077	245976	246779	NA	IPR000315 B-box-type zinc finger;IPR001841 Zinc finger, RING-type;IPR013083 Zinc finger, RING/FYVE/PHD-type;IPR017907 Zinc finger, RING-type, conserved site	go_function:GO:0008270 zinc ion binding	NA	NA	NA	Cab	Cab-UP g24015	Cab-UP g24015
g71967	Adra	Cab	-7.33969041220274	3.00865779863507	1.37893732950355e-07	2.29989374122394e-05	8	645	871	85	34	1934	392	121	27	11	4	0	0	4	4	3	Scaffold_2983	2074685	2075821	NA	NA	-	NA	NA	NA	Cab	Cab-UP g71967	Cab-UP g71967
g67514	Adra	Cab	-2.76962776611189	3.83858257350526	1.50399899644164e-07	2.45059282635591e-05	218	551	1039	650	431	506	244	643	179	381	500	298	102	225	35	59	Scaffold_2806	54616	58254	NA	NA	-	NA	NA	NA	Cab	Cab-UP g67514	Cab-UP g67514
g42531	Adra	Cab	-2.39414651007302	2.09026012042484	1.56183186740371e-07	2.52539867292712e-05	50	208	201	233	116	76	3	202	88	73	158	67	21	47	56	27	Scaffold_1906	3026890	3040853	NA	NA	-	NA	NA	NA	Cab	Cab-UP g42531	Cab-UP g42531
g57383	Adra	Cab	-4.16092779812656	0.0768485955207614	1.64557599774321e-07	2.64065081698459e-05	18	73	43	31	16	96	36	37	4	9	6	3	1	5	3	3	Scaffold_2440	155705	156712	B3gt5	IPR002659 Glycosyl transferase, family 31;IPR029044 Nucleotide-diphospho-sugar transferases	go_function:GO:0016758 transferase activity, transferring hexosyl groups;go_component:GO:0016020 membrane;go_process:GO:0006486 protein glycosylation	Beta-1,3-GalTase 1	NA	NA	Cab	Cab-UP g57383 B3gt5	Cab-UP g57383
g32564	Adra	Cab	-2.06992290860209	6.45977817714247	1.79864094026968e-07	2.82213425161424e-05	1775	4068	2209	4164	8075	1990	628	1328	286	387	348	227	473	1544	857	1112	Scaffold_1439	336837	343905	NA	IPR012317 Poly(ADP-ribose) polymerase, catalytic domain	go_function:GO:0003950 NAD+ ADP-ribosyltransferase activity	NA	NA	NA	Cab	Cab-UP g32564	Cab-UP g32564
g49266	Adra	Cab	-5.55558802502114	3.66931772256213	1.97875525763764e-07	3.08191131377062e-05	206	1060	749	24	6117	634	1365	628	56	77	114	33	9	26	13	13	Scaffold_2163	134160	143506	NA	NA	-	NA	NA	NA	Cab	Cab-UP g49266	Cab-UP g49266
g63356	Adra	Cab	-6.93616719642705	5.5455976604487	2.01578151272092e-07	3.1166630658726e-05	12	3743	5166	578	308	13572	7209	979	319	56	14	16	15	27	13	32	Scaffold_2650	230718	234634	NA	NA	-	NA	NA	NA	Cab	Cab-UP g63356	Cab-UP g63356
g969	Adra	Cab	-2.94663750454151	0.44823923382456	2.1806424161001e-07	3.34712809114728e-05	30	46	62	80	17	21	34	25	15	31	27	19	7	6	4	17	Scaffold_71	160222	161109	NA	IPR029526 PiggyBac transposable element-derived protein	-	NA	NA	NA	Cab	Cab-UP g969	Cab-UP g969
g50063	Adra	Cab	-3.70401241576838	3.52956533710222	2.31696903176458e-07	3.53079410293793e-05	51	528	403	1494	75	103	21	291	35	61	60	35	46	29	70	27	Scaffold_2193	560004	645219	NA	IPR043128 Reverse transcriptase/Diguanylate cyclase domain;IPR000477 Reverse transcriptase domain;IPR036397 Ribonuclease H superfamily;IPR041588 Integrase zinc-binding domain;IPR041577 Reverse transcriptase/retrotransposon-derived protein, RNase H-like domain;IPR001584 Integrase, catalytic core;IPR043502 DNA/RNA polymerase superfamily;IPR029063 S-adenosyl-L-methionine-dependent methyltransferase;…	go_function:GO:0003676 nucleic acid binding;go_process:GO:0015074 DNA integration	NA	NA	NA	Cab	Cab-UP g50063	Cab-UP g50063
g59836	Adra	Cab	-2.98513952968365	2.46137407705874	2.39531609332539e-07	3.59841031835592e-05	37	265	314	427	340	226	39	149	114	213	322	112	23	40	12	68	Scaffold_2534	458048	481857	NA	IPR003599 Immunoglobulin subtype;IPR013106 Immunoglobulin V-set domain;IPR013783 Immunoglobulin-like fold;IPR007110 Immunoglobulin-like domain;IPR036179 Immunoglobulin-like domain superfamily	-	NA	NA	NA	Cab	Cab-UP g59836	Cab-UP g59836
g24052	Adra	Cab	-2.32055156380119	1.84998192297651	2.42819809545441e-07	3.62211915900812e-05	94	95	119	224	184	118	64	144	158	167	378	213	23	29	43	37	Scaffold_1077	524760	526406	NA	IPR003879 Butyrophylin-like, SPRY domain;IPR001841 Zinc finger, RING-type;IPR006574 SPRY-associated;IPR000315 B-box-type zinc finger;IPR003877 SPRY domain;IPR043136 B30.2/SPRY domain superfamily;IPR013083 Zinc finger, RING/FYVE/PHD-type;IPR017907 Zinc finger, RING-type, conserved site;IPR001870 B30.2/SPRY domain;IPR013320 Concanavalin A-like lectin/glucanase domain superfamily	go_function:GO:0008270 zinc ion binding;go_function:GO:0005515 protein binding	NA	NA	NA	Cab	Cab-UP g24052	Cab-UP g24052
g39187	Adra	Cab	-3.86163955073298	0.767457740482898	2.83658348248097e-07	4.13485065340962e-05	8	110	81	118	100	61	16	52	29	38	68	39	3	6	4	11	Scaffold_1790	268396	272109	NA	IPR009079 Four-helical cytokine-like, core	-	NA	NA	NA	Cab	Cab-UP g39187	Cab-UP g39187
g61393	Adra	Cab	-2.80266938866407	1.69544247698389	3.45871674659707e-07	4.95017149502832e-05	73	53	297	126	91	139	73	84	71	139	47	40	17	29	28	15	Scaffold_2586	38945	46440	NA	IPR001304 C-type lectin-like;IPR016186 C-type lectin-like/link domain superfamily;IPR016187 C-type lectin fold	-	NA	NA	NA	Cab	Cab-UP g61393	Cab-UP g61393
g48441	Adra	Cab	-6.88412145410517	4.29793860193002	4.74679088684821e-07	6.57166827223652e-05	5	1720	1900	258	171	9155	4106	619	183	22	21	6	4	16	5	14	Scaffold_2123	904312	904989	NA	IPR009803 Protein of unknown function DUF1373	-	NA	NA	NA	Cab	Cab-UP g48441	Cab-UP g48441
g52134	Adra	Cab	-5.9860569291526	4.10073209407696	5.74914121289462e-07	7.84209345747338e-05	16	1252	1946	302	101	8785	2746	390	141	57	0	10	19	4	10	23	Scaffold_2269	85865	87040	NA	NA	-	NA	NA	NA	Cab	Cab-UP g52134	Cab-UP g52134
g3944	Adra	Cab	-6.40198275110349	4.16387179215658	5.77550079957439e-07	7.84209345747338e-05	5	1476	1854	254	133	5672	3010	486	162	45	11	11	7	16	9	16	Scaffold_170	110337	111006	NA	IPR009803 Protein of unknown function DUF1373	-	NA	NA	NA	Cab	Cab-UP g3944	Cab-UP g3944
g4750	Adra	Cab	-6.90757178560969	5.00942566800627	5.9323812957101e-07	7.93437448898363e-05	11	2759	3370	248	125	9988	5430	499	229	44	7	11	15	8	15	19	Scaffold_203	3116017	3117273	DIA4	IPR029039 Flavoprotein-like superfamily;IPR003680 Flavodoxin-like fold	-	Azoreductase	NA	NA	Cab	Cab-UP g4750 DIA4	Cab-UP g4750
g42709	Adra	Cab	-5.40576941633881	5.51225908121384	5.95583771007647e-07	7.93437448898363e-05	35	3620	4766	667	280	14370	6962	1081	351	78	29	25	48	54	53	80	Scaffold_1906	6176395	6186236	NA	IPR001507 Zona pellucida domain;IPR042235 Zona pellucida, ZP-C domain	-	NA	NA	NA	Cab	Cab-UP g42709	Cab-UP g42709
g14558	Adra	Cab	-2.34895646623913	2.5438500537626	6.84142714259102e-07	9.00093849281758e-05	61	318	163	406	76	69	46	173	449	496	344	497	38	53	43	82	Scaffold_628	2384430	2397708	CGL2	IPR001314 Peptidase S1A, chymotrypsin family;IPR001254 Serine proteases, trypsin domain;IPR043504 Peptidase S1, PA clan, chymotrypsin-like fold;IPR033116 Serine proteases, trypsin family, serine active site;IPR018114 Serine proteases, trypsin family, histidine active site;IPR009003 Peptidase S1, PA clan	go_process:GO:0006508 proteolysis;go_function:GO:0004252 serine-type endopeptidase activity	Granzyme A	NA	NA	Cab	Cab-UP g14558 CGL2	Cab-UP g14558
g24592	Adra	Cab	-3.31053928824064	2.50865038451074	7.54109769949833e-07	9.79972585710268e-05	98	323	378	112	48	109	14	152	142	33	162	52	16	65	9	35	Scaffold_1110	1032171	1047099	NA	NA	-	NA	NA	NA	Cab	Cab-UP g24592	Cab-UP g24592
g48377	Adra	Cab	-6.81994499792107	2.60287590856222	7.93829688275357e-07	0.000102529880835662	3	412	732	125	68	1447	1543	275	81	13	0	2	2	6	0	4	Scaffold_2123	16817	17488	NA	IPR009803 Protein of unknown function DUF1373	-	NA	NA	NA	Cab	Cab-UP g48377	Cab-UP g48377
g50772	Adra	Cab	-2.29188213457774	4.20428973154278	8.36183481508082e-07	0.000107345687910934	200	1036	1185	444	980	458	436	639	490	851	1341	508	101	247	168	206	Scaffold_2216	38269	41898	NA	IPR006703 AIG1-type guanine nucleotide-binding (G) domain;IPR027417 P-loop containing nucleoside triphosphate hydrolase	go_function:GO:0005525 GTP binding	NA	NA	NA	Cab	Cab-UP g50772	Cab-UP g50772
g72058	Adra	Cab	-10.9540666692993	2.25617610534524	8.87606966757476e-07	0.000112456711132472	14	23	1126	22	3266	64	7	0	12	25	2	9	0	0	0	0	Scaffold_2989	549726	555006	smac	IPR015142 Smac/DIABLO protein;IPR009062 Smac/DIABLO-like superfamily	go_process:GO:0006919 activation of cysteine-type endopeptidase activity involved in apoptotic process;go_component:GO:0005739 mitochondrion;go_process:GO:0006915 apoptotic process	Diablo homolog, mitochondrial	NA	NA	Cab	Cab-UP g72058 smac	Cab-UP g72058
g9204	Adra	Cab	-6.43985381809627	4.77048867389579	9.58631940259804e-07	0.000118056638131298	5	1966	3315	407	206	9444	4465	646	186	21	0	9	14	19	12	25	Scaffold_385	1577845	1580832	ZP1	IPR000519 P-type trefoil domain;IPR001507 Zona pellucida domain;IPR042235 Zona pellucida, ZP-C domain;IPR017977 Zona pellucida domain, conserved site;IPR017957 P-type trefoil, conserved site	-	Processed zona pellucida sperm-binding protein 4	NA	NA	Cab	Cab-UP g9204 ZP1	Cab-UP g9204
g48384	Adra	Cab	-7.52887883425576	5.06161480425528	1.0308360842762e-06	0.000124233717767613	7	3270	2881	193	107	6292	5036	515	140	21	0	11	3	15	6	19	Scaffold_2123	49084	49712	NA	IPR009803 Protein of unknown function DUF1373	-	NA	NA	NA	Cab	Cab-UP g48384	Cab-UP g48384
g70914	Adra	Cab	-6.30497373522363	5.20674046238544	1.03225069998583e-06	0.000124233717767613	6	2806	3902	923	392	5949	6019	1094	484	44	8	11	23	24	13	44	Scaffold_2938	54873	56030	NA	NA	-	NA	NA	NA	Cab	Cab-UP g70914	Cab-UP g70914
g50840	Adra	Cab	-4.09627650750051	6.05626406030244	1.09153737391664e-06	0.00013062680595651	123	4477	7187	1383	659	23403	9682	1733	612	249	295	120	157	261	168	251	Scaffold_2217	373728	393522	TTC32	IPR001507 Zona pellucida domain;IPR019734 Tetratricopeptide repeat;IPR042235 Zona pellucida, ZP-C domain;IPR011990 Tetratricopeptide-like helical domain superfamily;IPR017977 Zona pellucida domain, conserved site;IPR013026 Tetratricopeptide repeat-containing domain	go_function:GO:0005515 protein binding	TPR repeat protein 32	NA	NA	Cab	Cab-UP g50840 TTC32	Cab-UP g50840
g54141	Adra	Cab	-10.6424782856322	1.94077725954974	1.14124063675771e-06	0.000135807635774168	0	276	470	47	10	1421	712	81	20	3	0	3	0	0	0	0	Scaffold_2339	636859	637291	hh2b	IPR000558 Histone H2B;IPR009072 Histone-fold;IPR007125 Histone H2A/H2B/H3	go_function:GO:0003677 DNA binding;go_component:GO:0000786 nucleosome;go_function:GO:0046982 protein heterodimerization activity	Histone H2B	NA	NA	Cab	Cab-UP g54141 hh2b	Cab-UP g54141
g37185	Adra	Cab	-6.63880210004947	4.9956308379607	1.28036198756079e-06	0.000147394715328873	4	2678	3190	529	275	7752	6118	956	292	50	7	13	11	19	26	14	Scaffold_1682	770661	771409	NA	IPR009803 Protein of unknown function DUF1373	-	NA	NA	NA	Cab	Cab-UP g37185	Cab-UP g37185
g41387	Adra	Cab	-5.55426181300801	3.08262885131081	1.35869065921241e-06	0.000155566408342904	7	699	804	147	64	3650	1970	220	100	25	0	8	4	6	15	14	Scaffold_1879	6671259	6671704	NA	NA	-	NA	NA	NA	Cab	Cab-UP g41387	Cab-UP g41387
g32204	Adra	Cab	-9.02624426501884	0.391301999858672	1.39211583824605e-06	0.000158536546697461	0	72	147	56	13	1270	76	10	12	6	5	0	0	0	0	0	Scaffold_1421	585895	586377	NA	NA	-	NA	NA	NA	Cab	Cab-UP g32204	Cab-UP g32204
g2359	Adra	Cab	-8.01783297412981	3.21474910220986	1.40162913714656e-06	0.00015876635498951	2	873	848	60	23	2177	1447	130	80	16	0	3	0	4	2	2	Scaffold_113	921008	921820	DIA4	IPR029039 Flavoprotein-like superfamily;IPR003680 Flavodoxin-like fold	-	Azoreductase	NA	NA	Cab	Cab-UP g2359 DIA4	Cab-UP g2359
g45612	Adra	Cab	-2.7525147456714	1.2004573994664	1.44893986931619e-06	0.000160056045652327	32	111	88	149	266	33	21	24	140	77	109	54	3	25	16	25	Scaffold_2029	9823	11081	NA	IPR020440 Interleukin-17, chordata;IPR029034 Cystine-knot cytokine;IPR010345 Interleukin-17 family	go_function:GO:0005125 cytokine activity;go_component:GO:0005576 extracellular region;go_process:GO:0006954 inflammatory response	NA	NA	NA	Cab	Cab-UP g45612	Cab-UP g45612
g44184	Adra	Cab	-4.058044735276	-0.226073341720373	1.45192707953797e-06	0.000160056045652327	35	23	31	33	1	5	30	27	8	3	1	1	3	1	2	4	Scaffold_1968	1868	6383	NA	NA	-	NA	NA	NA	Cab	Cab-UP g44184	Cab-UP g44184
g45437	Adra	Cab	-2.81514380590836	1.68792340687907	1.45835222410061e-06	0.000160056045652327	126	58	114	140	12	8	22	59	18	34	34	22	17	25	20	28	Scaffold_2022	109360	111686	NA	IPR043502 DNA/RNA polymerase superfamily	-	NA	NA	NA	Cab	Cab-UP g45437	Cab-UP g45437
g26866	Adra	Cab	-4.99404168797848	2.21204695901298	1.61049351168113e-06	0.000172290270527423	8	250	487	244	63	4508	664	133	43	17	6	7	0	10	8	15	Scaffold_1199	13862	22657	NA	IPR001507 Zona pellucida domain	-	NA	NA	NA	Cab	Cab-UP g26866	Cab-UP g26866
g4916	Adra	Cab	-8.7724968105571	0.144008967046799	1.83600792823272e-06	0.000191532135168889	0	77	88	54	18	374	143	20	4	0	0	0	0	0	0	0	Scaffold_216	429875	437978	NA	IPR001507 Zona pellucida domain;IPR036397 Ribonuclease H superfamily;IPR002492 Transposase, Tc1-like;IPR042235 Zona pellucida, ZP-C domain;IPR040196 Zona pellucida sperm-binding protein 3	go_function:GO:0003676 nucleic acid binding;go_function:GO:0003677 DNA binding;go_process:GO:0015074 DNA integration;go_process:GO:0006313 transposition, DNA-mediated;go_process:GO:0035803 egg coat formation;go_function:GO:0035804 structural constituent of egg coat;go_process:GO:0007339 binding of sperm to zona pellucida	NA	NA	NA	Cab	Cab-UP g4916	Cab-UP g4916
g44615	Adra	Cab	-5.96490352172016	2.06054929413569	1.83966275081481e-06	0.000191532135168889	44	392	173	88	151	137	108	82	40	122	40	28	0	0	3	12	Scaffold_1990	420609	424573	IRG1	IPR005656 MmgE/PrpD;IPR042188 MmgE/PrpD superfamily, domain 2;IPR042183 MmgE/PrpD superfamily, domain 1;IPR036148 MmgE/PrpD superfamily	go_function:GO:0016829 lyase activity	Aconitate decarboxylase 1	NA	NA	Cab	Cab-UP g44615 IRG1	Cab-UP g44615
g16279	Adra	Cab	-4.81664679314138	0.504438230248432	1.91102818087163e-06	0.000196501936539917	35	15	123	99	8	0	31	144	0	13	21	52	0	3	0	8	Scaffold_689	2735709	2773963	GABRA2	IPR006028 Gamma-aminobutyric acid A receptor/Glycine receptor alpha;IPR006201 Neurotransmitter-gated ion-channel;IPR001390 Gamma-aminobutyric-acid A receptor, alpha subunit;IPR036734 Neurotransmitter-gated ion-channel ligand-binding domain superfamily;IPR006029 Neurotransmitter-gated ion-channel transmembrane domain;IPR006202 Neurotransmitter-gated ion-channel ligand-binding domain;IPR005432 Gamm…	go_component:GO:0016021 integral component of membrane;go_function:GO:0004888 transmembrane signaling receptor activity;go_function:GO:0005216 ion channel activity;go_process:GO:0034220 ion transmembrane transport;go_component:GO:0016020 membrane;go_process:GO:0006811 ion transport;go_function:GO:0004890 GABA-A receptor activity;go_function:GO:0005230 extracellular ligand-gated ion channel activi…	Gamma-aminobutyric acid receptor subunit alpha-2	NA	NA	Cab	Cab-UP g16279 GABRA2	Cab-UP g16279
g36251	Adra	Cab	-4.22808626660191	3.49491983561096	1.97577645727638e-06	0.00020127073579227	21	753	1199	261	134	6374	2059	292	181	45	109	51	19	23	31	56	Scaffold_1659	572118	587093	NA	NA	-	NA	NA	NA	Cab	Cab-UP g36251	Cab-UP g36251
g11909	Adra	Cab	-6.69618881138863	3.37208954873414	1.97640983121481e-06	0.00020127073579227	1	814	1118	172	84	3534	2276	348	120	24	3	5	5	8	2	7	Scaffold_507	24264	24913	NA	IPR009803 Protein of unknown function DUF1373	-	NA	NA	NA	Cab	Cab-UP g11909	Cab-UP g11909
g16493	Adra	Cab	-8.69619890911103	0.0710206975213626	2.00007834361518e-06	0.000202298785780269	0	76	74	56	0	1576	86	37	11	5	0	9	0	0	0	0	Scaffold_691	3163485	3185009	NA	IPR001507 Zona pellucida domain;IPR000519 P-type trefoil domain;IPR042235 Zona pellucida, ZP-C domain;IPR017957 P-type trefoil, conserved site	-	NA	NA	NA	Cab	Cab-UP g16493	Cab-UP g16493
g28205	Adra	Cab	-2.10595863695855	2.94256446955815	2.00560593965898e-06	0.000202298785780269	176	300	357	216	380	300	218	411	304	516	609	356	72	129	43	86	Scaffold_1282	840732	853131	CGL1	IPR001314 Peptidase S1A, chymotrypsin family;IPR001254 Serine proteases, trypsin domain;IPR043504 Peptidase S1, PA clan, chymotrypsin-like fold;IPR033116 Serine proteases, trypsin family, serine active site;IPR018114 Serine proteases, trypsin family, histidine active site;IPR009003 Peptidase S1, PA clan	go_process:GO:0006508 proteolysis;go_function:GO:0004252 serine-type endopeptidase activity	Granzyme B	NA	NA	Cab	Cab-UP g28205 CGL1	Cab-UP g28205
g24030	Adra	Cab	-2.01739875690999	1.91101442440777	2.02161518191922e-06	0.000202909719653275	45	139	285	124	39	98	67	101	59	124	70	51	28	48	39	52	Scaffold_1077	375973	377622	NA	IPR003879 Butyrophylin-like, SPRY domain;IPR000315 B-box-type zinc finger;IPR003877 SPRY domain;IPR001841 Zinc finger, RING-type;IPR006574 SPRY-associated;IPR013083 Zinc finger, RING/FYVE/PHD-type;IPR043136 B30.2/SPRY domain superfamily;IPR017907 Zinc finger, RING-type, conserved site;IPR001870 B30.2/SPRY domain;IPR013320 Concanavalin A-like lectin/glucanase domain superfamily	go_function:GO:0008270 zinc ion binding;go_function:GO:0005515 protein binding	NA	NA	NA	Cab	Cab-UP g24030	Cab-UP g24030
g11908	Adra	Cab	-6.52037831643887	2.31165795178704	2.03082147892051e-06	0.000202909719653275	2	300	645	114	68	1359	1502	273	76	14	0	2	2	6	0	4	Scaffold_507	18055	18726	NA	IPR009803 Protein of unknown function DUF1373	-	NA	NA	NA	Cab	Cab-UP g11908	Cab-UP g11908
g63886	Adra	Cab	-6.66350147877137	3.90504852578134	2.13013450404491e-06	0.000210397188463583	5	1226	1667	96	35	3925	2130	198	76	15	9	5	10	5	5	11	Scaffold_2670	98218	98634	h2ax	IPR002119 Histone H2A;IPR007125 Histone H2A/H2B/H3;IPR009072 Histone-fold;IPR032454 Histone H2A, C-terminal domain	go_function:GO:0003677 DNA binding;go_component:GO:0000786 nucleosome;go_function:GO:0046982 protein heterodimerization activity	Histone H2A	NA	NA	Cab	Cab-UP g63886 h2ax	Cab-UP g63886
g67409	Adra	Cab	-6.201380298919	4.25637254731072	2.13555828154425e-06	0.000210397188463583	6	1454	2196	247	104	6979	3160	614	174	19	10	0	4	15	14	27	Scaffold_2805	843957	845054	NA	NA	-	NA	NA	NA	Cab	Cab-UP g67409	Cab-UP g67409
g70680	Adra	Cab	-4.76175856269224	5.54764892744933	2.33110899875921e-06	0.000226502526659255	31	3011	5631	1056	448	18275	8511	1520	587	248	77	85	78	129	78	90	Scaffold_2930	1379810	1388810	NA	IPR001507 Zona pellucida domain	-	NA	NA	NA	Cab	Cab-UP g70680	Cab-UP g70680
g48376	Adra	Cab	-6.6626223853532	3.39282864841359	2.34502494183235e-06	0.000226814238894488	1	836	1115	176	83	3634	2317	355	124	26	3	5	5	9	2	7	Scaffold_2123	10630	11279	NA	IPR009803 Protein of unknown function DUF1373	-	NA	NA	NA	Cab	Cab-UP g48376	Cab-UP g48376
g3932	Adra	Cab	-5.43819634907726	2.77054437555675	2.51718161485399e-06	0.000241262176316005	4	223	1210	140	90	4698	1803	418	103	20	6	5	9	9	6	9	Scaffold_170	4871	5509	NA	IPR009803 Protein of unknown function DUF1373	-	NA	NA	NA	Cab	Cab-UP g3932	Cab-UP g3932
g5874	Adra	Cab	-4.35775381879473	-0.0126238727404546	2.63762478298179e-06	0.000250538870641795	41	18	41	50	1	8	28	30	6	6	5	4	5	1	2	1	Scaffold_249	129242	129802	NA	IPR036397 Ribonuclease H superfamily;IPR001584 Integrase, catalytic core;IPR012337 Ribonuclease H-like superfamily	go_function:GO:0003676 nucleic acid binding;go_process:GO:0015074 DNA integration	NA	NA	NA	Cab	Cab-UP g5874	Cab-UP g5874
g35930	Adra	Cab	-2.08540251141838	0.71530580005526	2.69197798967503e-06	0.000253428790121317	21	53	90	98	8	12	8	59	6	26	12	16	10	30	13	17	Scaffold_1635	46913	47524	NA	NA	-	NA	NA	NA	Cab	Cab-UP g35930	Cab-UP g35930
g44356	Adra	Cab	-5.97883992136032	3.52468631606254	3.05872419103702e-06	0.000282925309233826	8	737	1549	130	52	2405	2144	327	85	24	13	13	3	5	11	22	Scaffold_1970	603708	604340	cldn7	IPR004031 PMP-22/EMP/MP20/Claudin superfamily;IPR006187 Claudin;IPR017974 Claudin, conserved site	go_component:GO:0016021 integral component of membrane;go_component:GO:0005923 bicellular tight junction;go_function:GO:0005198 structural molecule activity	Claudin-3	Claudin-1	hyperosmotic salinity response	Cab	Cab-UP g44356 cldn7	Cab-UP g44356 Claudin-1
g37150	Adra	Cab	-2.41841540710142	5.88476005745563	4.23873187464214e-06	0.000369484850076831	304	2209	5179	3527	209	1422	528	1526	197	876	521	236	358	291	709	694	Scaffold_1682	121511	123393	NA	IPR006703 AIG1-type guanine nucleotide-binding (G) domain;IPR027417 P-loop containing nucleoside triphosphate hydrolase	go_function:GO:0005525 GTP binding	NA	NA	NA	Cab	Cab-UP g37150	Cab-UP g37150
g22273	Adra	Cab	-7.1543852427204	3.11527276052017	4.27781624962557e-06	0.000371363540162167	6	623	990	180	78	3025	1530	249	59	17	11	10	0	0	7	6	Scaffold_990	188876	189596	NA	NA	-	NA	NA	NA	Cab	Cab-UP g22273	Cab-UP g22273
g56939	Adra	Cab	-7.97422671650601	-0.742667742271948	4.35481572561059e-06	0.000376504925305647	28	7	49	6	0	398	65	10	8	0	0	0	0	0	0	0	Scaffold_2430	753759	760347	tdrd7	IPR002999 Tudor domain;IPR035437 SNase-like, OB-fold superfamily	-	Tudor domain-containing protein 7	NA	NA	Cab	Cab-UP g56939 tdrd7	Cab-UP g56939
g3943	Adra	Cab	-7.48268069612115	3.41445610923403	4.56528832484963e-06	0.000391445601315772	3	995	984	67	47	3377	1357	181	36	16	12	9	3	0	5	4	Scaffold_170	99011	106590	NA	IPR009803 Protein of unknown function DUF1373	-	NA	NA	NA	Cab	Cab-UP g3943	Cab-UP g3943
g18481	Adra	Cab	-3.7522194319713	5.59144570169396	4.60431656505475e-06	0.000391445601315772	913	354	5182	3462	616	2731	736	145	20127	3221	5232	2810	316	65	198	74	Scaffold_750	381377	389998	hcea	IPR001506 Peptidase M12A;IPR000998 MAM domain;IPR006026 Peptidase, metallopeptidase;IPR008974 TRAF-like;IPR024079 Metallopeptidase, catalytic domain superfamily;IPR034035 Astacin-like metallopeptidase domain;IPR013320 Concanavalin A-like lectin/glucanase domain superfamily	go_process:GO:0006508 proteolysis;go_function:GO:0004222 metalloendopeptidase activity;go_component:GO:0016020 membrane;go_function:GO:0008270 zinc ion binding;go_function:GO:0008237 metallopeptidase activity;go_function:GO:0005515 protein binding	Choriolysin H 1	NA	NA	Cab	Cab-UP g18481 hcea	Cab-UP g18481
g70910	Adra	Cab	-8.00777581469071	-0.543369396874202	4.68554046939207e-06	0.000395414813636107	0	38	33	66	0	0	2	79	12	18	0	0	0	0	0	0	Scaffold_2935	254702	258123	NA	IPR003599 Immunoglobulin subtype;IPR003598 Immunoglobulin subtype 2;IPR013106 Immunoglobulin V-set domain;IPR013783 Immunoglobulin-like fold;IPR007110 Immunoglobulin-like domain;IPR036179 Immunoglobulin-like domain superfamily	-	NA	NA	NA	Cab	Cab-UP g70910	Cab-UP g70910
g50552	Adra	Cab	-6.98055465988788	4.69439085993758	4.98857610222837e-06	0.000412765699208599	10	2056	2855	346	155	8358	5240	623	183	32	0	7	0	15	12	22	Scaffold_2204	2185	3360	DIA4	IPR003680 Flavodoxin-like fold;IPR029039 Flavoprotein-like superfamily	-	Azoreductase	NA	NA	Cab	Cab-UP g50552 DIA4	Cab-UP g50552
g69676	Adra	Cab	-5.61514823276069	3.93615192925729	5.32214259474527e-06	0.000438652235182468	9	1189	1729	134	31	5218	2678	333	89	53	20	0	7	34	11	21	Scaffold_2890	344620	346257	NA	IPR005819 Linker histone H1/H5;IPR005818 Linker histone H1/H5, domain H15;IPR036388 Winged helix-like DNA-binding domain superfamily;IPR036390 Winged helix DNA-binding domain superfamily	go_function:GO:0003677 DNA binding;go_component:GO:0000786 nucleosome;go_process:GO:0006334 nucleosome assembly	NA	NA	NA	Cab	Cab-UP g69676	Cab-UP g69676
g49339	Adra	Cab	-2.63421796203529	-0.00450097325690751	5.6948286158832e-06	0.000463953306698607	19	27	29	87	12	16	0	47	17	27	21	21	7	9	5	8	Scaffold_2164	124410	126675	NA	NA	-	NA	NA	NA	Cab	Cab-UP g49339	Cab-UP g49339
g51155	Adra	Cab	-4.38339964128898	0.577226073683288	5.72959063692464e-06	0.000464996892227347	43	61	81	52	25	17	27	32	21	54	6	55	0	0	6	9	Scaffold_2236	98227	100222	NA	IPR006703 AIG1-type guanine nucleotide-binding (G) domain;IPR027417 P-loop containing nucleoside triphosphate hydrolase	go_function:GO:0005525 GTP binding	NA	NA	NA	Cab	Cab-UP g51155	Cab-UP g51155
g63429	Adra	Cab	-2.37056478842781	1.29652735056479	5.82177916399331e-06	0.000468885651147172	64	44	135	133	69	66	31	75	41	37	61	14	16	43	17	14	Scaffold_2650	1881440	1893314	NA	IPR003597 Immunoglobulin C1-set;IPR000477 Reverse transcriptase domain;IPR000305 GIY-YIG endonuclease;IPR013783 Immunoglobulin-like fold;IPR036179 Immunoglobulin-like domain superfamily;IPR043502 DNA/RNA polymerase superfamily	-	NA	NA	NA	Cab	Cab-UP g63429	Cab-UP g63429
g39189	Adra	Cab	-2.4248663179232	2.36542453498306	7.98407924190326e-06	0.000614977332734527	83	255	246	202	234	76	20	65	223	220	186	167	24	39	21	105	Scaffold_1790	331924	337175	NA	IPR020444 Interleukin-24;IPR009079 Four-helical cytokine-like, core;IPR020453 Interleukin-22	go_component:GO:0005576 extracellular region	NA	NA	NA	Cab	Cab-UP g39189	Cab-UP g39189
g26594	Adra	Cab	-2.81996134642388	4.59909660849434	8.07579329280552e-06	0.000617550373748038	429	1271	1757	263	1269	1284	1102	125	1204	2336	289	908	106	332	151	111	Scaffold_1163	12513	26246	NA	IPR003597 Immunoglobulin C1-set;IPR000353 MHC class II, beta chain, N-terminal;IPR014745 MHC class II, alpha/beta chain, N-terminal;IPR013783 Immunoglobulin-like fold;IPR007110 Immunoglobulin-like domain;IPR011162 MHC classes I/II-like antigen recognition protein;IPR036179 Immunoglobulin-like domain superfamily	go_process:GO:0019882 antigen processing and presentation;go_component:GO:0016020 membrane;go_component:GO:0042613 MHC class II protein complex;go_process:GO:0006955 immune response	NA	NA	NA	Cab	Cab-UP g26594	Cab-UP g26594
g52131	Adra	Cab	-6.81918342218873	4.02240620905969	8.75447500595885e-06	0.000658809521335851	0	1411	1454	372	133	8213	2495	404	192	14	10	3	6	5	4	17	Scaffold_2269	62090	63237	NA	NA	-	NA	NA	NA	Cab	Cab-UP g52131	Cab-UP g52131
g27542	Adra	Cab	-5.2185101904549	0.186000773012885	8.94016778953359e-06	0.000666798007457396	24	92	35	18	0	0	0	0	0	8	7	0	0	0	4	2	Scaffold_1248	418	861	NA	NA	NA	NA	NA	NA	Cab	Cab-UP g27542	Cab-UP g27542
g67577	Adra	Cab	-3.89319776232681	1.19496035796394	9.32478961133475e-06	0.000688214960095097	55	55	229	61	8	119	5	8	0	11	14	6	11	7	11	0	Scaffold_2812	386267	390972	GPR20	IPR000276 G protein-coupled receptor, rhodopsin-like;IPR017452 GPCR, rhodopsin-like, 7TM	go_component:GO:0016021 integral component of membrane;go_process:GO:0007186 G protein-coupled receptor signaling pathway;go_function:GO:0004930 G protein-coupled receptor activity	G-protein coupled receptor 20	NA	NA	Cab	Cab-UP g67577 GPR20	Cab-UP g67577
g62787	Adra	Cab	-9.63788145610387	0.962719450148061	1.04566684183537e-05	0.000753612055568748	0	149	222	14	16	700	250	43	0	10	0	0	0	0	0	0	Scaffold_2626	170029	181705	CGA1	IPR001019 Guanine nucleotide binding protein (G-protein), alpha subunit;IPR000469 G-protein alpha subunit, group 12/13;IPR011025 G protein alpha subunit, helical insertion;IPR027417 P-loop containing nucleoside triphosphate hydrolase	go_process:GO:0007186 G protein-coupled receptor signaling pathway;go_function:GO:0019001 guanyl nucleotide binding;go_function:GO:0031683 G-protein beta/gamma-subunit complex binding;go_function:GO:0003924 GTPase activity;go_process:GO:0007266 Rho protein signal transduction;go_function:GO:0001664 G protein-coupled receptor binding;go_process:GO:0007165 signal transduction	Adenylate cyclase-inhibiting G alpha protein	NA	NA	Cab	Cab-UP g62787 CGA1	Cab-UP g62787
g10290	Adra	Cab	-7.67508654857126	-0.845533482323531	1.04816341488168e-05	0.000753612055568748	0	32	47	25	4	280	50	18	8	3	6	0	0	0	0	0	Scaffold_442	2391123	2392766	NA	IPR011598 Myc-type, basic helix-loop-helix (bHLH) domain;IPR036638 Helix-loop-helix DNA-binding domain superfamily	go_function:GO:0046983 protein dimerization activity	NA	NA	NA	Cab	Cab-UP g10290	Cab-UP g10290
g26973	Adra	Cab	-2.12993747238097	3.42890618809881	1.04954941173062e-05	0.000753612055568748	259	246	761	311	363	470	486	1059	844	1012	1068	408	148	114	62	106	Scaffold_1207	39075	48170	NA	IPR001611 Leucine-rich repeat;IPR032675 Leucine-rich repeat domain superfamily	go_function:GO:0005515 protein binding	NA	NA	NA	Cab	Cab-UP g26973	Cab-UP g26973
g37189	Adra	Cab	-6.42982243372006	3.64049607901441	1.20242949674214e-05	0.000848995386666399	0	1071	1203	195	124	5916	2780	406	153	24	14	11	4	10	10	8	Scaffold_1682	807952	808645	NA	IPR009803 Protein of unknown function DUF1373	-	NA	NA	NA	Cab	Cab-UP g37189	Cab-UP g37189
g4418	Adra	Cab	-2.66432081627777	1.25130789096279	1.23629654530429e-05	0.000867126934524351	36	98	200	50	0	0	0	7	0	0	0	0	7	18	21	27	Scaffold_189	605095	605506	NA	NA	-	NA	NA	NA	Cab	Cab-UP g4418	Cab-UP g4418
g13653	Adra	Cab	-2.43815739570588	5.89942992186567	1.43621673267307e-05	0.000978197518697135	1733	1466	933	4697	1598	1151	900	503	1228	1987	1524	1059	409	455	274	996	Scaffold_605	3877608	3888013	EPER	IPR001073 C1q domain;IPR019791 Haem peroxidase, animal-type;IPR037120 Haem peroxidase domain superfamily, animal type;IPR008983 Tumour necrosis factor-like domain superfamily;IPR029599 Eosinophil peroxidase;IPR010255 Haem peroxidase superfamily	go_function:GO:0005515 protein binding;go_process:GO:0006952 defense response;go_function:GO:0004601 peroxidase activity;go_process:GO:0006979 response to oxidative stress;go_function:GO:0020037 heme binding	Lactoperoxidase	NA	NA	Cab	Cab-UP g13653 EPER	Cab-UP g13653
g27035	Adra	March	14.4647548025195	5.64116571841545	6.70703913542249e-97	7.17250765142081e-93	0	952	4389	3	2250	1130	628	1757	0	0	0	0	2032	4501	1669	2428	Scaffold_1212	39713	47092	NA	NA	-	NA	NA	NA	Adra	Adra-UP g27035	Adra-UP g27035
g15815	Adra	March	12.3249012305469	3.5064820907133	1.27910385725715e-65	6.83936832475396e-62	329	2052	1280	653	99	263	0	652	0	0	0	0	311	663	781	625	Scaffold_674	44223	67595	NA	NA	-	NA	NA	NA	Adra	Adra-UP g15815	Adra-UP g15815
g59809	Adra	March	4.49108526669212	8.17027539360036	8.82331371485167e-62	3.77426067466495e-58	2649	4014	12225	10697	3306	3293	3553	6365	801	572	1068	583	9376	19303	14473	15158	Scaffold_2534	14471	22325	NA	IPR040581 SNTX, thioredoxin-like domain	-	Cytolytic toxin-alpha	NA	NA	Adra	Adra-UP g59809	Adra-UP g59809
g34432	Adra	March	11.8499971216919	3.0337847989665	1.07113541665501e-46	3.27277775591675e-43	133	0	502	119	122	226	79	171	0	0	0	0	432	602	364	262	Scaffold_1553	28399	44346	NA	IPR013106 Immunoglobulin V-set domain;IPR003599 Immunoglobulin subtype;IPR013783 Immunoglobulin-like fold;IPR007110 Immunoglobulin-like domain;IPR036179 Immunoglobulin-like domain superfamily	-	NA	NA	NA	Adra	Adra-UP g34432	Adra-UP g34432
g18473	Adra	March	10.5435181932404	1.74108195169984	7.5815072567395e-39	1.62153277207144e-35	0	1	0	0	0	0	0	0	0	0	0	0	142	182	195	155	Scaffold_750	257144	261558	NA	IPR000477 Reverse transcriptase domain;IPR041588 Integrase zinc-binding domain;IPR001584 Integrase, catalytic core;IPR041577 Reverse transcriptase/retrotransposon-derived protein, RNase H-like domain;IPR036397 Ribonuclease H superfamily;IPR043128 Reverse transcriptase/Diguanylate cyclase domain;IPR012337 Ribonuclease H-like superfamily;IPR043502 DNA/RNA polymerase superfamily	go_process:GO:0015074 DNA integration;go_function:GO:0003676 nucleic acid binding	NA	NA	NA	Adra	Adra-UP g18473	Adra-UP g18473
g34428	Adra	March	11.6523316768456	2.83748354261047	8.29431963115444e-34	1.10874317669457e-30	53	0	200	28	20	53	10	69	0	0	0	0	208	314	641	286	Scaffold_1553	13988	14709	HSPA12A	IPR043129 ATPase, nucleotide binding domain	-	Heat shock 70 kDa protein 12A	NA	NA	Adra	Adra-UP g34428 HSPA12A	Adra-UP g34428
g59807	Adra	March	9.76964061405929	0.983985106389796	9.78560707492724e-30	1.16274757843635e-26	0	0	0	0	0	0	0	0	0	0	0	0	76	106	111	105	Scaffold_2534	6110	6867	NA	NA	-	NA	NA	NA	Adra	Adra-UP g59807	Adra-UP g59807
g53592	Adra	March	9.88007248071146	1.09129183705368	1.00100003248237e-28	1.12680993130174e-25	0	0	64	0	0	0	0	0	0	0	0	0	102	141	75	113	Scaffold_2328	118998	132578	NA	NA	-	NA	NA	NA	Adra	Adra-UP g53592	Adra-UP g53592
g42447	Adra	March	2.9171306784367	4.55094284108524	2.10593778170031e-28	2.25208986375031e-25	164	382	835	500	214	206	401	355	146	143	202	169	871	1516	689	1297	Scaffold_1906	1718533	1719639	rgs1	IPR016137 RGS domain;IPR024066 RGS, subdomain 1/3;IPR036305 RGS domain superfamily	-	RGS4	NA	NA	Adra	Adra-UP g42447 rgs1	Adra-UP g42447
g16842	Adra	March	3.20994185867415	3.64744218996763	1.51439268936099e-26	1.47226503818422e-23	100	189	474	542	47	35	162	44	66	106	62	60	468	723	407	778	Scaffold_708	1077707	1086850	NA	IPR016186 C-type lectin-like/link domain superfamily;IPR001304 C-type lectin-like;IPR016187 C-type lectin fold	-	NA	NA	NA	Adra	Adra-UP g16842	Adra-UP g16842
g36077	Adra	March	3.546162071996	4.92489099829364	8.54818693239393e-25	7.03187008115543e-22	81	716	2630	376	238	1336	1697	1711	92	248	128	112	1181	1885	1108	1694	Scaffold_1643	444048	456272	NA	IPR003879 Butyrophylin-like, SPRY domain;IPR004020 DAPIN domain;IPR029495 NACHT-associated domain;IPR006574 SPRY-associated;IPR003877 SPRY domain;IPR001611 Leucine-rich repeat;IPR043136 B30.2/SPRY domain superfamily;IPR041075 NOD2, winged helix domain;IPR032675 Leucine-rich repeat domain superfamily;IPR007111 NACHT nucleoside triphosphatase;IPR041267 NACHT, LRR and PYD domains-containing protein,…	go_function:GO:0005515 protein binding	NA	NA	NA	Adra	Adra-UP g36077	Adra-UP g36077
g64771	Adra	March	9.60964640343667	3.86539747792473	3.83218582760606e-22	2.48372092366177e-19	392	890	1754	1286	341	476	291	1105	0	4	0	0	155	1494	603	1035	Scaffold_2702	2075323	2076255	TMEM3	IPR002659 Glycosyl transferase, family 31	go_function:GO:0016758 transferase activity, transferring hexosyl groups;go_component:GO:0016020 membrane;go_process:GO:0006486 protein glycosylation	BGnT-7	NA	NA	Adra	Adra-UP g64771 TMEM3	Adra-UP g64771
g46855	Adra	March	2.11262031971227	5.78927873803396	2.40488402888182e-21	1.46959027456355e-18	955	1961	3612	3796	2506	842	904	2349	773	529	867	407	1776	3073	1896	2719	Scaffold_2068	748624	759713	BTF1	IPR003879 Butyrophylin-like, SPRY domain;IPR001841 Zinc finger, RING-type;IPR003877 SPRY domain;IPR006574 SPRY-associated;IPR043136 B30.2/SPRY domain superfamily;IPR013083 Zinc finger, RING/FYVE/PHD-type;IPR027370 RING-type zinc-finger, LisH dimerisation motif;IPR017907 Zinc finger, RING-type, conserved site;IPR001870 B30.2/SPRY domain;IPR013320 Concanavalin A-like lectin/glucanase domain superfa…	go_function:GO:0005515 protein binding	Erythroid membrane-associated protein	NA	NA	Adra	Adra-UP g46855 BTF1	Adra-UP g46855
g59808	Adra	March	9.12930822222668	0.36428692941824	3.39316124032624e-21	2.01591479466938e-18	0	0	0	0	0	0	0	0	0	0	0	0	59	57	67	68	Scaffold_2534	6897	12165	NA	NA	-	NA	NA	NA	Adra	Adra-UP g59808	Adra-UP g59808
g15818	Adra	March	9.91465983012102	1.12659129815326	7.33498763842543e-21	4.24001934082819e-18	82	831	165	225	53	154	0	55	0	0	0	0	46	97	170	134	Scaffold_674	81147	85457	NA	NA	-	NA	NA	NA	Adra	Adra-UP g15818	Adra-UP g15818
g50557	Adra	March	3.23870613592679	7.58278745216213	2.15685244253106e-20	1.09835142954415e-17	2328	3915	9010	8384	3924	2909	7891	4921	1517	729	1027	1117	9798	9391	6557	9407	Scaffold_2204	64702	72447	azi2	IPR002433 Ornithine decarboxylase;IPR000183 Ornithine/DAP/Arg decarboxylase;IPR029066 PLP-binding barrel;IPR009006 Alanine racemase/group IV decarboxylase, C-terminal;IPR022643 Orn/DAP/Arg decarboxylase 2, C-terminal;IPR022644 Orn/DAP/Arg decarboxylase 2, N-terminal;IPR022653 Orn/DAP/Arg decarboxylase 2, pyridoxal-phosphate binding site	go_process:GO:0006596 polyamine biosynthetic process;go_function:GO:0003824 catalytic activity	ODC	NA	NA	Adra	Adra-UP g50557 azi2	Adra-UP g50557
g66660	Adra	March	2.24371291417647	8.75666828571764	2.35976584761916e-20	1.17373655695066e-17	9771	20728	25101	22146	19845	11901	10289	27350	5159	4488	5077	3664	13684	29218	14950	17922	Scaffold_2774	1316156	1316782	cldn7	IPR003549 Claudin-3;IPR004031 PMP-22/EMP/MP20/Claudin superfamily;IPR006187 Claudin	go_component:GO:0005923 bicellular tight junction;go_function:GO:0005198 structural molecule activity;go_component:GO:0016021 integral component of membrane	Claudin-3	Claudin-1	hyperosmotic salinity response	Adra	Adra-UP g66660 cldn7	Adra-UP g66660 Claudin-1
g5102	Adra	March	3.34401828589186	3.04525633409696	3.93332975278246e-20	1.86946792783358e-17	138	132	421	33	50	96	298	254	34	32	57	53	333	583	326	314	Scaffold_216	3096464	3099403	NA	NA	-	NA	NA	NA	Adra	Adra-UP g5102	Adra-UP g5102
g19523	Adra	March	3.18910208195667	3.03863880538117	5.55399091886427e-19	2.37577515545338e-16	77	216	369	310	73	410	122	260	66	39	52	39	312	630	220	404	Scaffold_804	3868583	3898252	dio1	IPR000643 Iodothyronine deiodinase;IPR036249 Thioredoxin-like superfamily	go_function:GO:0004800 thyroxine 5'-deiodinase activity	5DI	NA	NA	Adra	Adra-UP g19523 dio1	Adra-UP g19523
g38301	Adra	March	2.74438585251069	4.60069239496577	9.75715541916128e-19	4.01319307894272e-16	71	151	365	367	131	188	228	304	149	231	208	173	643	1951	721	1280	Scaffold_1751	1860560	1890697	ERR1	IPR001628 Zinc finger, nuclear hormone receptor-type;IPR001723 Nuclear hormone receptor;IPR000536 Nuclear hormone receptor, ligand-binding domain;IPR013088 Zinc finger, NHR/GATA-type;IPR027289 Oestrogen-related receptor;IPR024178 Oestrogen receptor/oestrogen-related receptor;IPR035500 Nuclear hormone receptor-like domain superfamily	go_function:GO:0008270 zinc ion binding;go_function:GO:0003700 DNA-binding transcription factor activity;go_process:GO:0006355 regulation of transcription, DNA-templated;go_function:GO:0043565 sequence-specific DNA binding;go_function:GO:0003707 steroid hormone receptor activity;go_function:GO:0003677 DNA binding;go_function:GO:0005496 steroid binding;go_component:GO:0005634 nucleus	ERR-alpha	NA	NA	Adra	Adra-UP g38301 ERR1	Adra-UP g38301
g976	Adra	March	2.03079122387788	3.25789764542121	1.17520798943036e-18	4.65469416258085e-16	261	168	329	361	606	121	371	412	108	104	152	94	265	504	358	493	Scaffold_71	223034	226761	NA	IPR001841 Zinc finger, RING-type;IPR000315 B-box-type zinc finger;IPR000477 Reverse transcriptase domain;IPR013083 Zinc finger, RING/FYVE/PHD-type;IPR043136 B30.2/SPRY domain superfamily;IPR017907 Zinc finger, RING-type, conserved site;IPR043502 DNA/RNA polymerase superfamily	go_function:GO:0008270 zinc ion binding	NA	NA	NA	Adra	Adra-UP g976	Adra-UP g976
g33822	Adra	March	9.44003366596542	0.665509088278669	3.09553047175095e-18	1.1221560293188e-15	0	0	3	0	38	0	34	36	0	0	0	0	71	147	52	52	Scaffold_1512	617308	621794	NA	IPR008361 Melanin-concentrating hormone receptor;IPR000276 G protein-coupled receptor, rhodopsin-like;IPR017452 GPCR, rhodopsin-like, 7TM	go_component:GO:0016021 integral component of membrane;go_process:GO:0007186 G protein-coupled receptor signaling pathway;go_function:GO:0004930 G protein-coupled receptor activity	NA	NA	NA	Adra	Adra-UP g33822	Adra-UP g33822
g23953	Adra	March	9.43029226138648	0.656157821209923	5.48611514165864e-18	1.95561717749658e-15	0	0	3	0	38	0	34	36	0	0	0	0	71	147	50	52	Scaffold_1073	5382355	5386865	NA	IPR008361 Melanin-concentrating hormone receptor;IPR000276 G protein-coupled receptor, rhodopsin-like;IPR017452 GPCR, rhodopsin-like, 7TM	go_component:GO:0016021 integral component of membrane;go_process:GO:0007186 G protein-coupled receptor signaling pathway;go_function:GO:0004930 G protein-coupled receptor activity	NA	NA	NA	Adra	Adra-UP g23953	Adra-UP g23953
g33600	Adra	March	3.96523216023162	3.81717425660155	1.00827459655627e-17	3.53524214281073e-15	285	582	792	1310	1064	792	681	924	30	95	64	22	753	702	577	626	Scaffold_1497	573869	589402	NA	IPR002589 Macro domain;IPR012317 Poly(ADP-ribose) polymerase, catalytic domain;IPR043472 Macro domain-like	go_function:GO:0003950 NAD+ ADP-ribosyltransferase activity	NA	NA	NA	Adra	Adra-UP g33600	Adra-UP g33600
g71322	Adra	March	2.0036525563917	4.206176897691	1.45546358739981e-17	5.02087987214632e-15	243	485	717	770	435	188	422	545	269	240	226	162	543	1018	543	1039	Scaffold_2959	1243807	1245099	atbR	IPR001672 Phosphoglucose isomerase (PGI);IPR018189 Phosphoglucose isomerase, conserved site;IPR035482 Phosphoglucose isomerase, SIS domain 2;IPR035476 Phosphoglucose isomerase, SIS domain 1	go_process:GO:0006096 glycolytic process;go_process:GO:0006094 gluconeogenesis;go_function:GO:0004347 glucose-6-phosphate isomerase activity	GPI	NA	NA	Adra	Adra-UP g71322 atbR	Adra-UP g71322
g37216	Adra	March	5.55260202237967	1.98394081990457	1.84389539690438e-17	6.16206792952982e-15	0	130	209	20	0	6	28	28	8	0	5	6	100	217	148	365	Scaffold_1687	51927	57979	NA	IPR038717 Tc1-like transposase, DDE domain;IPR036397 Ribonuclease H superfamily;IPR005162 Retrotransposon gag domain;IPR032567 LDOC1-related;IPR036875 Zinc finger, CCHC-type superfamily	go_function:GO:0003676 nucleic acid binding;go_function:GO:0008270 zinc ion binding	NA	NA	NA	Adra	Adra-UP g37216	Adra-UP g37216
g67588	Adra	March	8.46341785483605	-0.265409633565383	4.61088171436367e-16	1.38897940995507e-13	0	6	0	0	0	0	0	0	0	0	0	0	38	45	43	32	Scaffold_2812	490188	494017	NA	IPR043128 Reverse transcriptase/Diguanylate cyclase domain;IPR000477 Reverse transcriptase domain;IPR041588 Integrase zinc-binding domain;IPR036397 Ribonuclease H superfamily;IPR041577 Reverse transcriptase/retrotransposon-derived protein, RNase H-like domain;IPR001584 Integrase, catalytic core;IPR043502 DNA/RNA polymerase superfamily;IPR012337 Ribonuclease H-like superfamily	go_function:GO:0003676 nucleic acid binding;go_process:GO:0015074 DNA integration	NA	NA	NA	Adra	Adra-UP g67588	Adra-UP g67588
g33608	Adra	March	5.02741144421432	4.14561452840483	7.6469232700201e-16	2.26838629365163e-13	142	188	616	719	404	262	264	237	21	52	36	20	1030	994	1079	249	Scaffold_1497	617931	627905	NA	IPR002589 Macro domain;IPR012317 Poly(ADP-ribose) polymerase, catalytic domain;IPR043472 Macro domain-like	go_function:GO:0003950 NAD+ ADP-ribosyltransferase activity	NA	NA	NA	Adra	Adra-UP g33608	Adra-UP g33608
g48583	Adra	March	6.00682515568648	0.324224953892442	8.23591613382142e-16	2.38040235500233e-13	0	7	14	23	0	1	0	0	0	2	2	0	34	107	53	60	Scaffold_2127	56727	57131	NA	NA	-	NA	NA	NA	Adra	Adra-UP g48583	Adra-UP g48583
g55413	Adra	March	2.1892389519767	5.63485062965038	1.11240216290641e-15	3.17227432803231e-13	204	255	503	675	193	182	374	289	335	651	810	413	1310	2671	1984	2705	Scaffold_2382	304563	315436	acyH	IPR000043 Adenosylhomocysteinase-like;IPR015878 S-adenosyl-L-homocysteine hydrolase, NAD binding domain;IPR042172 Adenosylhomocysteinase-like superfamily;IPR020082 S-adenosyl-L-homocysteine hydrolase, conserved site;IPR036291 NAD(P)-binding domain superfamily	go_function:GO:0004013 adenosylhomocysteinase activity	Adenosylhomocysteinase	Adenosylhomocysteinase	positive regulation of sodium ion transport; regulation of ion transmembrane transporter activity; angiotensin-activated signaling pathway; epithelial fluid transport; regulation of anion transport	Adra	Adra-UP g55413 acyH	Adra-UP g55413 Adenosylhomocysteinase
g28807	Adra	March	2.34462421670765	6.43483530585746	1.18223908613081e-15	3.32706968081128e-13	1456	3410	6736	4425	4069	2605	2266	5128	896	851	1161	608	1628	4385	4744	4685	Scaffold_1305	583683	590901	cyp2k1	IPR002401 Cytochrome P450, E-class, group I;IPR001128 Cytochrome P450;IPR036396 Cytochrome P450 superfamily;IPR017972 Cytochrome P450, conserved site	go_function:GO:0004497 monooxygenase activity;go_function:GO:0020037 heme binding;go_function:GO:0005506 iron ion binding;go_function:GO:0016705 oxidoreductase activity, acting on paired donors, with incorporation or reduction of molecular oxygen	Debrisoquine 4-hydroxylase	NA	NA	Adra	Adra-UP g28807 cyp2k1	Adra-UP g28807
g26329	Adra	March	3.20583474844927	8.54728190906277	3.11373117011321e-15	8.42993446409889e-13	1033	3228	1863	3160	1482	447	964	4215	2353	1796	3281	1633	12291	9916	15566	33059	Scaffold_1152	5102748	5113840	hem1	IPR015118 5-aminolevulinate synthase presequence;IPR004839 Aminotransferase, class I/classII;IPR015422 Pyridoxal phosphate-dependent transferase, small domain;IPR015421 Pyridoxal phosphate-dependent transferase, major domain;IPR010961 Tetrapyrrole biosynthesis, 5-aminolevulinic acid synthase;IPR001917 Aminotransferase, class-II, pyridoxal-phosphate binding site;IPR015424 Pyridoxal phosphate-depen…	go_process:GO:0006778 porphyrin-containing compound metabolic process;go_function:GO:0003870 5-aminolevulinate synthase activity;go_function:GO:0030170 pyridoxal phosphate binding;go_component:GO:0005759 mitochondrial matrix;go_process:GO:0009058 biosynthetic process;go_function:GO:0003824 catalytic activity;go_process:GO:0033014 tetrapyrrole biosynthetic process;go_function:GO:0016740 transferas…	5-aminolevulinic acid synthase	NA	NA	Adra	Adra-UP g26329 hem1	Adra-UP g26329
g72669	Adra	March	8.52663890367878	-0.210161537929519	3.71429165655385e-15	9.93015874379672e-13	0	1	0	0	0	0	0	0	0	0	0	0	47	33	41	41	Scaffold_3005	209643	211916	NA	IPR041588 Integrase zinc-binding domain;IPR001584 Integrase, catalytic core;IPR036397 Ribonuclease H superfamily;IPR012337 Ribonuclease H-like superfamily	go_process:GO:0015074 DNA integration;go_function:GO:0003676 nucleic acid binding	NA	NA	NA	Adra	Adra-UP g72669	Adra-UP g72669
g27920	Adra	March	2.71263895427164	2.29597071055014	3.85574850874434e-15	1.01810801364227e-12	130	362	469	277	76	38	22	46	22	43	57	35	162	308	187	232	Scaffold_1270	306798	311706	NA	IPR000315 B-box-type zinc finger	go_function:GO:0008270 zinc ion binding	NA	NA	NA	Adra	Adra-UP g27920	Adra-UP g27920
g33002	Adra	March	6.55434396575499	0.933946128798167	7.42594733794857e-15	1.91356821281981e-12	0	0	0	0	5	0	0	0	0	0	0	4	67	111	129	71	Scaffold_1473	980020	987964	NA	NA	-	NA	NA	NA	Adra	Adra-UP g33002	Adra-UP g33002
g57223	Adra	March	8.45105293124794	-0.264248804379693	4.40225480994831e-14	1.0346750096173e-11	17	31	10	25	40	0	6	26	0	0	0	0	17	51	33	67	Scaffold_2438	377180	378733	NA	IPR000477 Reverse transcriptase domain	-	NA	NA	NA	Adra	Adra-UP g57223	Adra-UP g57223
g10822	Adra	March	8.32203058671189	-0.38522415957774	4.84519889838006e-14	1.12640341346253e-11	29	51	113	129	0	33	0	100	0	0	0	0	15	53	40	44	Scaffold_465	239364	242052	NA	NA	-	NA	NA	NA	Adra	Adra-UP g10822	Adra-UP g10822
g29244	Adra	March	3.34113986778898	5.0780261232113	5.20342641769557e-14	1.18394557682631e-11	730	835	1979	1373	350	429	959	691	140	267	219	121	642	3537	1233	1421	Scaffold_1318	928456	944399	rdgC	IPR006186 Serine/threonine-specific protein phosphatase/bis(5-nucleosyl)-tetraphosphatase;IPR002048 EF-hand domain;IPR004843 Calcineurin-like phosphoesterase domain, ApaH type;IPR029052 Metallo-dependent phosphatase-like;IPR012008 Serine/threonine-protein phosphatase with EF-hands;IPR018247 EF-Hand 1, calcium-binding site;IPR000048 IQ motif, EF-hand binding site;IPR011992 EF-hand domain pair	go_function:GO:0016787 hydrolase activity;go_function:GO:0005509 calcium ion binding;go_function:GO:0030145 manganese ion binding;go_function:GO:0005506 iron ion binding;go_function:GO:0004721 phosphoprotein phosphatase activity;go_process:GO:0050906 detection of stimulus involved in sensory perception;go_function:GO:0005515 protein binding	Serine/threonine-protein phosphatase 5	NA	NA	Adra	Adra-UP g29244 rdgC	Adra-UP g29244
g63879	Adra	March	12.9392993089855	4.11851650998662	5.96860512501121e-14	1.34375290961831e-11	6	454	877	0	0	4	0	0	0	0	0	0	80	390	2402	672	Scaffold_2669	7183	10399	NA	IPR023341 MABP domain	-	NA	NA	NA	Adra	Adra-UP g63879	Adra-UP g63879
g15712	Adra	March	13.0033826600047	4.18241008518515	2.21419559436159e-13	4.88218715177377e-11	6	483	1042	0	0	7	0	0	0	0	0	0	74	365	2533	731	Scaffold_669	21702	26164	NA	IPR023341 MABP domain	-	NA	NA	NA	Adra	Adra-UP g15712	Adra-UP g15712
g33603	Adra	March	5.34916515262624	2.21414769881025	8.92788082286211e-13	1.85446297138488e-10	61	118	192	365	177	168	151	209	16	7	0	3	244	279	223	158	Scaffold_1497	595394	602076	NA	IPR012677 Nucleotide-binding alpha-beta plait domain superfamily	-	NA	NA	NA	Adra	Adra-UP g33603	Adra-UP g33603
g59806	Adra	March	8.27873649242144	-0.441570448149595	8.93069413000949e-13	1.85446297138488e-10	0	0	0	0	0	0	0	1	0	0	0	0	36	33	45	22	Scaffold_2534	5742	6005	NA	NA	NA	NA	NA	NA	Adra	Adra-UP g59806	Adra-UP g59806
g59246	Adra	March	3.2589939231868	7.53478416239702	1.58333579860257e-12	3.2561909673569e-10	259	761	383	780	540	971	463	1543	819	888	1252	1227	3712	5840	8821	17846	Scaffold_2521	200978	218099	ae1	IPR001717 Anion exchange protein;IPR003020 Bicarbonate transporter, eukaryotic;IPR011531 Bicarbonate transporter, C-terminal;IPR016152 Phosphotransferase/anion transporter;IPR013769 Band 3 cytoplasmic domain;IPR018241 Anion exchange, conserved site	go_process:GO:0006820 anion transport;go_function:GO:0005452 inorganic anion exchanger activity;go_component:GO:0016020 membrane;go_component:GO:0016021 integral component of membrane;go_function:GO:0008509 anion transmembrane transporter activity	AE 2	Electrogenic sodium bicarbonate cotransporter 1	renal system process; regulation of systemic arterial blood pressure; sodium ion transport; anion transport; chloride transport; cellular ion homeostasis; sodium ion transmembrane transport; negative regulation of urine volume; sodium ion export across plasma membrane; ion homeostasis; chloride transmembrane transport; proton transmembrane transport	Adra	Adra-UP g59246 ae1	Adra-UP g59246 Electrogenic sodium bicarbonate cotransporter 1
g33601	Adra	March	6.10081499768825	0.093130552140182	1.92345130873265e-12	3.88101665954472e-10	9	59	42	51	56	44	28	37	3	0	0	0	26	98	44	48	Scaffold_1497	590679	592235	NA	IPR036691 Endonuclease/exonuclease/phosphatase superfamily;IPR005135 Endonuclease/exonuclease/phosphatase;IPR027124 SWR1-complex protein 5/Craniofacial development protein 1/2	go_function:GO:0003824 catalytic activity	NA	NA	NA	Adra	Adra-UP g33601	Adra-UP g33601
g99	Adra	March	3.2931846204192	1.93448556640544	5.56049257958312e-12	1.06185549367968e-09	0	0	16	18	16	15	21	27	33	18	17	16	106	201	105	329	Scaffold_1	1743961	1774285	al	IPR001356 Homeobox domain;IPR003654 OAR domain;IPR033203 Homeobox protein aristaless-like 4;IPR017970 Homeobox, conserved site;IPR009057 Homeobox-like domain superfamily	go_function:GO:0003677 DNA binding;go_process:GO:0006357 regulation of transcription by RNA polymerase II;go_process:GO:0007275 multicellular organism development;go_function:GO:0003700 DNA-binding transcription factor activity;go_process:GO:0006355 regulation of transcription, DNA-templated;go_function:GO:0000981 DNA-binding transcription factor activity, RNA polymerase II-specific	Homeobox protein goosecoid	NA	NA	Adra	Adra-UP g99 al	Adra-UP g99
g37145	Adra	March	2.47583022636871	2.28832118092437	5.77562262283492e-12	1.09317713855923e-09	111	339	971	376	186	196	263	485	34	59	35	47	130	279	182	284	Scaffold_1682	242	16120	NA	IPR036834 Blc2-like superfamily;IPR002475 Bcl2-like	go_process:GO:0042981 regulation of apoptotic process	NA	NA	NA	Adra	Adra-UP g37145	Adra-UP g37145
g64769	Adra	March	8.06262200918769	-0.620715012216193	6.35480111719453e-12	1.19224987977681e-09	5	13	13	18	7	3	11	9	0	0	0	0	13	30	29	55	Scaffold_2702	2071517	2071813	NA	NA	NA	NA	NA	NA	Adra	Adra-UP g64769	Adra-UP g64769
g13524	Adra	March	3.91998162761211	4.77857474322253	6.46336672165321e-12	1.20207380384973e-09	694	760	1640	1135	317	417	1082	1052	47	173	156	51	1394	2448	703	804	Scaffold_605	1572405	1576184	HUT2	IPR029020 Ammonium/urea transporter;IPR004937 Urea transporter	go_component:GO:0016021 integral component of membrane;go_process:GO:0071918 urea transmembrane transport;go_function:GO:0015204 urea transmembrane transporter activity	Solute carrier family 14 member 1	NA	NA	Adra	Adra-UP g13524 HUT2	Adra-UP g13524
g3994	Adra	March	4.2362729915033	0.442083535280993	8.2953639618375e-12	1.51642089244257e-09	0	5	5	6	6	4	3	21	6	4	6	0	44	67	85	60	Scaffold_176	168852	172087	NA	IPR002492 Transposase, Tc1-like;IPR038717 Tc1-like transposase, DDE domain;IPR036397 Ribonuclease H superfamily;IPR009057 Homeobox-like domain superfamily	go_function:GO:0003677 DNA binding;go_process:GO:0015074 DNA integration;go_process:GO:0006313 transposition, DNA-mediated;go_function:GO:0003676 nucleic acid binding	NA	NA	NA	Adra	Adra-UP g3994	Adra-UP g3994
g13522	Adra	March	3.67862111239018	5.27442149778568	2.38427516889252e-11	4.14592498473766e-09	946	1071	1759	2140	413	677	1020	1388	116	306	189	85	1990	3534	888	1054	Scaffold_605	1554107	1568876	HUT2	IPR029020 Ammonium/urea transporter;IPR004937 Urea transporter	go_component:GO:0016021 integral component of membrane;go_process:GO:0071918 urea transmembrane transport;go_function:GO:0015204 urea transmembrane transporter activity	Solute carrier family 14 member 1	NA	NA	Adra	Adra-UP g13522 HUT2	Adra-UP g13522
g60684	Adra	March	8.28954585005634	-0.40602544278461	2.85080865350869e-11	4.83913456200348e-09	20	0	15	27	0	13	9	0	0	0	0	0	11	62	24	57	Scaffold_2556	1457140	1458500	NA	NA	-	NA	NA	NA	Adra	Adra-UP g60684	Adra-UP g60684
g51916	Adra	March	2.45955057425926	3.89351892127278	3.22008543580536e-11	5.38056150789102e-09	121	304	350	707	328	263	168	610	111	132	259	75	509	1135	462	557	Scaffold_2261	497663	509739	KNP3	IPR005821 Ion transport domain;IPR029581 Transient receptor potential cation channel subfamily M member 4	go_function:GO:0005216 ion channel activity;go_process:GO:0055085 transmembrane transport;go_component:GO:0016020 membrane;go_process:GO:0006811 ion transport;go_component:GO:0016021 integral component of membrane;go_process:GO:0034220 ion transmembrane transport;go_process:GO:0006812 cation transport;go_process:GO:0002724 regulation of T cell cytokine production;go_function:GO:0005227 calcium ac…	Calcium-activated non-selective cation channel 1	NA	NA	Adra	Adra-UP g51916 KNP3	Adra-UP g51916
g66668	Adra	March	4.84625041813241	4.98976992085529	4.1137512322778e-11	6.76807010430443e-09	569	1032	2119	925	287	338	591	913	60	118	32	46	1402	3979	599	629	Scaffold_2774	1361292	1361957	cldn7	IPR004031 PMP-22/EMP/MP20/Claudin superfamily;IPR006187 Claudin	go_component:GO:0016021 integral component of membrane;go_component:GO:0005923 bicellular tight junction;go_function:GO:0005198 structural molecule activity	Claudin-3	Claudin-1	hyperosmotic salinity response	Adra	Adra-UP g66668 cldn7	Adra-UP g66668 Claudin-1
g18510	Adra	March	2.71765447946634	8.62521464010465	4.67072277125524e-11	7.56798625997023e-09	1929	6089	6031	5765	2193	1029	1622	6004	2411	2189	5303	2929	10633	11546	19130	30862	Scaffold_752	139605	149650	cahz	IPR001148 Alpha carbonic anhydrase domain;IPR036398 Alpha carbonic anhydrase domain superfamily;IPR023561 Carbonic anhydrase, alpha-class;IPR018338 Carbonic anhydrase, alpha-class, conserved site	go_function:GO:0008270 zinc ion binding;go_function:GO:0004089 carbonate dehydratase activity	Carbonic anhydrase	Carbonic anhydrase	regulation of chloride transport; hypotonic salinity response; angiotensin-activated signaling pathway	Adra	Adra-UP g18510 cahz	Adra-UP g18510 Carbonic anhydrase
g3267	Adra	March	3.46337454503203	5.23003746854645	5.47400474431633e-11	8.73716518443565e-09	213	469	1106	733	448	127	302	397	173	119	192	248	730	1683	3401	1280	Scaffold_143	810521	817890	cyp3a27	IPR002401 Cytochrome P450, E-class, group I;IPR001128 Cytochrome P450;IPR036396 Cytochrome P450 superfamily;IPR017972 Cytochrome P450, conserved site	go_function:GO:0004497 monooxygenase activity;go_function:GO:0020037 heme binding;go_function:GO:0005506 iron ion binding;go_function:GO:0016705 oxidoreductase activity, acting on paired donors, with incorporation or reduction of molecular oxygen	Cytochrome P450-PCN1	NA	NA	Adra	Adra-UP g3267 cyp3a27	Adra-UP g3267
g10039	Adra	March	2.41574654731246	7.88977561808226	6.2464303131433e-11	9.82343026011095e-09	698	1475	4157	4223	1627	1491	3860	5681	2113	1765	3169	2091	7275	21146	7131	7496	Scaffold_431	174053	211302	ae1	IPR001717 Anion exchange protein;IPR003020 Bicarbonate transporter, eukaryotic;IPR009071 High mobility group box domain;IPR016152 Phosphotransferase/anion transporter;IPR013769 Band 3 cytoplasmic domain;IPR036910 High mobility group box domain superfamily;IPR011531 Bicarbonate transporter, C-terminal;IPR018241 Anion exchange, conserved site	go_process:GO:0006820 anion transport;go_function:GO:0005452 inorganic anion exchanger activity;go_component:GO:0016020 membrane;go_component:GO:0016021 integral component of membrane;go_function:GO:0008509 anion transmembrane transporter activity	AE 2	Electrogenic sodium bicarbonate cotransporter 1	renal system process; regulation of systemic arterial blood pressure; sodium ion transport; anion transport; chloride transport; cellular ion homeostasis; sodium ion transmembrane transport; negative regulation of urine volume; sodium ion export across plasma membrane; ion homeostasis; chloride transmembrane transport; proton transmembrane transport	Adra	Adra-UP g10039 ae1	Adra-UP g10039 Electrogenic sodium bicarbonate cotransporter 1
g71551	Adra	March	2.74296589066563	6.32130634844706	9.17532355972828e-11	1.40172728782477e-08	789	10027	10182	8238	891	609	337	1266	905	733	532	375	2492	7594	1808	3274	Scaffold_2967	4680	14391	NA	IPR001506 Peptidase M12A;IPR006026 Peptidase, metallopeptidase;IPR024079 Metallopeptidase, catalytic domain superfamily	go_process:GO:0006508 proteolysis;go_function:GO:0004222 metalloendopeptidase activity;go_function:GO:0008270 zinc ion binding;go_function:GO:0008237 metallopeptidase activity	NA	NA	NA	Adra	Adra-UP g71551	Adra-UP g71551
g69450	Adra	March	3.2716986538053	3.8920045847807	9.92705935128353e-11	1.49521088313558e-08	14	34	534	118	54	49	31	226	95	89	42	98	566	1052	246	1021	Scaffold_2878	65837	89881	cgn	IPR002928 Myosin tail	go_component:GO:0016459 myosin complex	Myosin heavy chain 9	NA	NA	Adra	Adra-UP g69450 cgn	Adra-UP g69450
g16637	Adra	March	3.11675995268224	1.54197172331494	1.05614800093831e-10	1.57964289818662e-08	9	37	55	272	76	157	88	81	25	15	8	21	87	130	150	168	Scaffold_701	198543	227429	NA	IPR002492 Transposase, Tc1-like;IPR011665 Brf1, TBP-binding domain;IPR036397 Ribonuclease H superfamily;IPR038717 Tc1-like transposase, DDE domain	go_function:GO:0003677 DNA binding;go_process:GO:0015074 DNA integration;go_process:GO:0006313 transposition, DNA-mediated;go_function:GO:0003676 nucleic acid binding	NA	NA	NA	Adra	Adra-UP g16637	Adra-UP g16637
g43077	Adra	March	8.16944785465521	-0.514851043881705	1.27453539749908e-10	1.89303910289656e-08	2	3	28	18	2	4	4	14	0	0	0	0	12	71	19	40	Scaffold_1925	31211	37150	NA	IPR041588 Integrase zinc-binding domain;IPR036397 Ribonuclease H superfamily;IPR040676 Domain of unknown function DUF5641;IPR008042 Retrotransposon, Pao;IPR043128 Reverse transcriptase/Diguanylate cyclase domain;IPR001584 Integrase, catalytic core;IPR012337 Ribonuclease H-like superfamily;IPR043502 DNA/RNA polymerase superfamily	go_function:GO:0003676 nucleic acid binding;go_process:GO:0015074 DNA integration	NA	NA	NA	Adra	Adra-UP g43077	Adra-UP g43077
g30040	Adra	March	3.03080135618024	2.83147352053357	1.45276718567753e-10	2.14288169429455e-08	49	55	248	118	57	116	79	138	46	29	91	28	127	601	289	371	Scaffold_1349	543436	582450	ETT	NA	-	Solute carrier family 22 member 4	NA	NA	Adra	Adra-UP g30040 ETT	Adra-UP g30040
g56864	Adra	March	2.00865951708817	5.82465961001404	2.41776881272282e-10	3.44741595776772e-08	254	471	895	1140	243	319	551	416	501	828	894	544	1912	4262	1655	1786	Scaffold_2425	1622780	1631755	NA	NA	-	NA	NA	NA	Adra	Adra-UP g56864	Adra-UP g56864
g66029	Adra	March	2.4384627819385	8.79810110203808	2.84372893967311e-10	3.9752728471718e-08	7114	3852	25260	16130	7258	6699	8253	13944	4464	6476	2953	2917	15738	16450	13410	33366	Scaffold_2751	105694	111513	NA	IPR040460 Gasdermin, pore forming domain;IPR041263 Gasdermin, PUB domain;IPR042377 Gasdermin-E	go_process:GO:0008219 cell death	NA	NA	NA	Adra	Adra-UP g66029	Adra-UP g66029
g35779	Adra	March	2.13358651418491	4.38975723336721	4.33021982212341e-10	5.89902812455895e-08	127	184	398	524	207	319	258	257	154	316	318	170	756	1460	747	594	Scaffold_1620	5560212	5598810	ae1	IPR001717 Anion exchange protein;IPR003020 Bicarbonate transporter, eukaryotic;IPR011531 Bicarbonate transporter, C-terminal;IPR013769 Band 3 cytoplasmic domain;IPR016152 Phosphotransferase/anion transporter;IPR002978 Anion exchange protein 2	go_process:GO:0006820 anion transport;go_function:GO:0005452 inorganic anion exchanger activity;go_component:GO:0016020 membrane;go_component:GO:0016021 integral component of membrane;go_function:GO:0008509 anion transmembrane transporter activity	AE 2	Electrogenic sodium bicarbonate cotransporter 1	renal system process; regulation of systemic arterial blood pressure; sodium ion transport; anion transport; chloride transport; cellular ion homeostasis; sodium ion transmembrane transport; negative regulation of urine volume; sodium ion export across plasma membrane; ion homeostasis; chloride transmembrane transport; proton transmembrane transport	Adra	Adra-UP g35779 ae1	Adra-UP g35779 Electrogenic sodium bicarbonate cotransporter 1
g61916	Adra	March	3.37035203742337	5.02371363229901	1.37716859700049e-09	1.73264011486156e-07	123	201	445	653	440	254	330	470	144	185	198	165	1614	3184	899	459	Scaffold_2604	847828	904431	CLC1	IPR001807 Chloride channel, voltage gated;IPR014743 Chloride channel, core	go_process:GO:0006821 chloride transport;go_process:GO:0055085 transmembrane transport;go_function:GO:0005247 voltage-gated chloride channel activity;go_component:GO:0016020 membrane	Chloride channel protein 2	Chloride channel protein 2	renal water homeostasis; renal water transport; chloride transport; transepithelial chloride transport; regulation of aldosterone biosynthetic process; ion transmembrane transport; regulation of ion transmembrane transport; transepithelial water transport; regulation of body fluid levels; chloride transmembrane transport	Adra	Adra-UP g61916 CLC1	Adra-UP g61916 Chloride channel protein 2
g8693	Adra	March	5.54101986388665	-0.363154540670775	1.71426964410227e-09	2.13167436907322e-07	0	22	14	0	0	32	0	72	0	0	0	3	21	36	54	35	Scaffold_357	3238	3744	NA	NA	-	NA	NA	NA	Adra	Adra-UP g8693	Adra-UP g8693
g46852	Adra	March	3.62119242496376	1.96321823209962	2.12264151922277e-09	2.56491846401902e-07	100	175	306	257	635	142	11	38	18	10	40	6	182	289	163	96	Scaffold_2068	702202	705588	BTF2	IPR003879 Butyrophylin-like, SPRY domain;IPR003877 SPRY domain;IPR006574 SPRY-associated;IPR043136 B30.2/SPRY domain superfamily;IPR001870 B30.2/SPRY domain;IPR013320 Concanavalin A-like lectin/glucanase domain superfamily	go_function:GO:0005515 protein binding	Erythroid membrane-associated protein	NA	NA	Adra	Adra-UP g46852 BTF2	Adra-UP g46852
g2049	Adra	March	2.13299522222629	9.43801077667484	2.19511568846542e-09	2.63759181712912e-07	5633	16951	34074	17003	5851	5519	6012	17657	6086	6367	12204	7006	18584	20021	35012	44062	Scaffold_89	2295134	2295646	pl	IPR005819 Linker histone H1/H5;IPR005818 Linker histone H1/H5, domain H15;IPR036388 Winged helix-like DNA-binding domain superfamily;IPR036390 Winged helix DNA-binding domain superfamily	go_function:GO:0003677 DNA binding;go_component:GO:0000786 nucleosome;go_process:GO:0006334 nucleosome assembly	Histone H1a	NA	NA	Adra	Adra-UP g2049 pl	Adra-UP g2049
g61913	Adra	March	3.51902638185561	4.26280200036944	2.26931544095797e-09	2.69645103617828e-07	78	114	214	402	249	100	133	261	68	90	145	76	896	2018	513	275	Scaffold_2604	794052	826241	CLC1	IPR001807 Chloride channel, voltage gated;IPR014743 Chloride channel, core	go_process:GO:0006821 chloride transport;go_process:GO:0055085 transmembrane transport;go_function:GO:0005247 voltage-gated chloride channel activity;go_component:GO:0016020 membrane	Chloride channel protein 2	Chloride channel protein 2	renal water homeostasis; renal water transport; chloride transport; transepithelial chloride transport; regulation of aldosterone biosynthetic process; ion transmembrane transport; regulation of ion transmembrane transport; transepithelial water transport; regulation of body fluid levels; chloride transmembrane transport	Adra	Adra-UP g61913 CLC1	Adra-UP g61913 Chloride channel protein 2
g23646	Adra	March	3.73434338305392	-0.144973209971011	2.5972585361045e-09	3.01903073751103e-07	3	21	13	11	6	4	1	9	0	6	5	3	35	50	29	51	Scaffold_1064	227971	228792	NA	IPR013830 SGNH hydrolase-type esterase domain	-	NA	NA	NA	Adra	Adra-UP g23646	Adra-UP g23646
g27032	Adra	March	7.7590131019032	-0.907836358181049	2.8675557017538e-09	3.25140989195071e-07	0	0	6	0	82	103	72	7	0	0	0	0	24	10	20	43	Scaffold_1212	17637	21311	NA	NA	-	NA	NA	NA	Adra	Adra-UP g27032	Adra-UP g27032
g63924	Adra	March	2.07666351113921	2.3560696545377	2.87318341863981e-09	3.25140989195071e-07	37	108	216	193	51	54	68	145	63	69	63	42	232	227	207	154	Scaffold_2670	679152	680849	NA	IPR003879 Butyrophylin-like, SPRY domain;IPR006574 SPRY-associated;IPR000315 B-box-type zinc finger;IPR003877 SPRY domain;IPR001841 Zinc finger, RING-type;IPR013083 Zinc finger, RING/FYVE/PHD-type;IPR043136 B30.2/SPRY domain superfamily;IPR017907 Zinc finger, RING-type, conserved site;IPR001870 B30.2/SPRY domain;IPR013320 Concanavalin A-like lectin/glucanase domain superfamily	go_function:GO:0008270 zinc ion binding;go_function:GO:0005515 protein binding	NA	NA	NA	Adra	Adra-UP g63924	Adra-UP g63924
g56865	Adra	March	2.14737366203176	6.47992632509727	2.9030754025745e-09	3.26794614264544e-07	357	668	1644	1860	338	382	750	694	696	1266	1426	689	3100	7122	2469	2778	Scaffold_2425	1634444	1637645	nhe3	IPR004709 Na+/H+ exchanger;IPR006153 Cation/H+ exchanger;IPR018422 Cation/H+ exchanger, CPA1 family	go_component:GO:0016021 integral component of membrane;go_function:GO:0015385 sodium:proton antiporter activity;go_process:GO:0055085 transmembrane transport;go_process:GO:0006814 sodium ion transport;go_process:GO:0006885 regulation of pH;go_function:GO:0015299 solute:proton antiporter activity;go_process:GO:0006812 cation transport	Sodium/hydrogen exchanger 3	NA	NA	Adra	Adra-UP g56865 nhe3	Adra-UP g56865
g5512	Adra	March	4.0281340073782	12.8412498462681	4.78087310987536e-09	5.24375969610329e-07	11615	77043	22682	34965	69819	29412	28343	285681	22835	11646	20003	42053	156662	147095	457721	703573	Scaffold_235	1253602	1254252	hba	IPR002338 Haemoglobin, alpha-type;IPR012292 Globin/Protoglobin;IPR000971 Globin;IPR009050 Globin-like superfamily	go_component:GO:0005833 hemoglobin complex;go_process:GO:0015671 oxygen transport;go_function:GO:0020037 heme binding;go_function:GO:0019825 oxygen binding	Alpha-globin	NA	NA	Adra	Adra-UP g5512 hba	Adra-UP g5512
g34814	Adra	March	4.14412803501978	0.0559639592870263	5.32805518292992e-09	5.78459107880736e-07	20	45	54	76	6	0	0	0	1	4	8	0	50	56	38	47	Scaffold_1579	595161	601433	NA	NA	-	NA	NA	NA	Adra	Adra-UP g34814	Adra-UP g34814
g48758	Adra	March	2.68013366528752	0.899780926759547	6.97553716550121e-09	7.38578162850197e-07	31	42	108	100	78	36	0	128	11	11	22	15	39	117	90	89	Scaffold_2134	18930	27306	NA	IPR007053 LRAT domain	-	NA	NA	NA	Adra	Adra-UP g48758	Adra-UP g48758
g51806	Adra	March	2.43165205064706	4.74914669100319	8.25217937671183e-09	8.60963963459086e-07	334	683	1257	1128	633	889	593	1913	114	285	420	218	591	2279	959	1127	Scaffold_2260	179875	183989	NA	NA	-	NA	NA	NA	Adra	Adra-UP g51806	Adra-UP g51806
g5511	Adra	March	2.92905772291307	13.4367182821404	1.08330956534731e-08	1.08270210203964e-06	74103	277554	158879	184645	83874	36801	83610	296233	72951	46327	101396	88222	266689	237165	576564	991499	Scaffold_235	1252172	1252776	ba1	IPR002337 Haemoglobin, beta-type;IPR000971 Globin;IPR012292 Globin/Protoglobin;IPR009050 Globin-like superfamily	go_component:GO:0005833 hemoglobin complex;go_process:GO:0015671 oxygen transport;go_function:GO:0020037 heme binding;go_function:GO:0019825 oxygen binding	Beta-globin	NA	NA	Adra	Adra-UP g5511 ba1	Adra-UP g5511
g18505	Adra	March	7.74128958079258	-0.918501876725017	1.35787087874997e-08	1.30820461057227e-06	0	10	3	5	0	0	3	6	0	0	0	0	13	9	37	38	Scaffold_752	122574	123167	NA	IPR016197 Chromo-like domain superfamily	-	NA	NA	NA	Adra	Adra-UP g18505	Adra-UP g18505
g36370	Adra	March	5.1126618571556	-0.813463621741802	2.40865677872142e-08	2.21100219670789e-06	14	17	38	40	5	20	0	10	0	3	0	0	22	32	31	17	Scaffold_1663	191555	192112	NA	IPR025307 FIIND domain	-	NA	NA	NA	Adra	Adra-UP g36370	Adra-UP g36370
g63399	Adra	March	3.59044515286714	0.676132762278097	2.51366321665953e-08	2.28775442033677e-06	0	19	16	5	40	19	15	20	9	6	11	3	24	57	92	133	Scaffold_2650	1006473	1008256	NA	IPR013083 Zinc finger, RING/FYVE/PHD-type;IPR001293 Zinc finger, TRAF-type	go_function:GO:0008270 zinc ion binding	NA	NA	NA	Adra	Adra-UP g63399	Adra-UP g63399
g26960	Adra	March	2.0993786848116	2.97305222109991	2.5979669185147e-08	2.35446256157595e-06	57	65	520	347	254	199	163	275	93	51	94	111	177	378	301	501	Scaffold_1206	487753	497670	thnsl2	IPR036052 Tryptophan synthase beta subunit-like PLP-dependent enzyme;IPR029144 Threonine synthase, N-terminal;IPR037158 Threonine synthase, N-terminal domain superfamily;IPR001926 Pyridoxal-phosphate dependent enzyme;IPR004450 Threonine synthase-like	-	TSH2	NA	NA	Adra	Adra-UP g26960 thnsl2	Adra-UP g26960
g1287	Adra	March	3.10522426267899	0.462472738649775	3.6914344625724e-08	3.26249587956606e-06	16	13	81	125	7	20	13	13	6	10	10	7	21	93	78	63	Scaffold_75	1988940	1989830	NA	IPR015095 Alkylated DNA repair protein AlkB, homologue 8, N-terminal;IPR000477 Reverse transcriptase domain;IPR043502 DNA/RNA polymerase superfamily	go_function:GO:0016706 2-oxoglutarate-dependent dioxygenase activity;go_function:GO:0008168 methyltransferase activity	NA	NA	NA	Adra	Adra-UP g1287	Adra-UP g1287
g60630	Adra	March	3.66962851650901	-0.411432271281702	3.89552428284461e-08	3.42870260746833e-06	8	15	35	20	2	5	2	17	2	1	6	3	39	32	27	32	Scaffold_2556	540541	569791	NA	IPR008906 HAT, C-terminal dimerisation domain;IPR012337 Ribonuclease H-like superfamily	go_function:GO:0046983 protein dimerization activity	NA	NA	NA	Adra	Adra-UP g60630	Adra-UP g60630
g63157	Adra	March	2.59799434578058	3.11289831191346	4.37659444316534e-08	3.78974096965264e-06	62	38	222	305	230	13	63	42	88	100	68	43	160	325	693	350	Scaffold_2644	68215	75236	Rip	IPR002401 Cytochrome P450, E-class, group I;IPR001128 Cytochrome P450;IPR008069 Cytochrome P450, E-class, group I, CYP2D-like;IPR036396 Cytochrome P450 superfamily;IPR017972 Cytochrome P450, conserved site	go_function:GO:0004497 monooxygenase activity;go_function:GO:0020037 heme binding;go_function:GO:0005506 iron ion binding;go_function:GO:0016705 oxidoreductase activity, acting on paired donors, with incorporation or reduction of molecular oxygen;go_function:GO:0016712 oxidoreductase activity, acting on paired donors, with incorporation or reduction of molecular oxygen, reduced flavin or flavopro…	4-nitrophenol 2-hydroxylase	NA	NA	Adra	Adra-UP g63157 Rip	Adra-UP g63157
g56316	Adra	March	3.7818149361733	-0.700679409240618	4.50343883689208e-08	3.88385281626805e-06	10	0	0	40	25	28	7	24	3	2	4	0	29	33	24	20	Scaffold_2408	1012756	1015301	NA	NA	-	NA	NA	NA	Adra	Adra-UP g56316	Adra-UP g56316
g15670	Adra	March	3.75975002533698	-0.450612060417864	5.66932285997891e-08	4.79270661380351e-06	0	7	13	39	2	2	0	1	3	2	5	1	21	64	17	34	Scaffold_664	184240	185277	NA	IPR000477 Reverse transcriptase domain;IPR043502 DNA/RNA polymerase superfamily	-	NA	NA	NA	Adra	Adra-UP g15670	Adra-UP g15670
g1719	Adra	March	3.91679353318036	-0.0486792072923244	6.28201818378311e-08	5.20774437654082e-06	35	0	0	38	26	34	9	85	4	2	8	0	42	60	46	27	Scaffold_84	265492	268638	NA	NA	-	NA	NA	NA	Adra	Adra-UP g1719	Adra-UP g1719
g21190	Adra	March	3.45395898787144	2.00764699194105	6.39189174324448e-08	5.27836990751015e-06	79	256	749	212	64	1521	579	184	39	16	20	7	103	236	73	390	Scaffold_899	2387501	2392934	NA	IPR031984 Solute carrier family 3 member 2, N-terminal domain;IPR042280 4F2 cell-surface antigen heavy chain;IPR017853 Glycoside hydrolase superfamily	go_process:GO:0006865 amino acid transport	NA	NA	NA	Adra	Adra-UP g21190	Adra-UP g21190
g62210	Adra	March	2.32640859713425	2.96448541581323	7.20442159739738e-08	5.85886574620286e-06	58	345	491	85	80	370	267	469	47	138	84	48	171	502	234	507	Scaffold_2609	1170669	1186428	NA	IPR004895 Prenylated rab acceptor PRA1	-	NA	NA	NA	Adra	Adra-UP g62210	Adra-UP g62210
g56487	Adra	March	8.79090127909615	0.0368283402093133	8.35238373047661e-08	6.69066603848066e-06	0	0	0	0	0	0	0	0	0	0	0	0	22	32	128	11	Scaffold_2414	139291	177526	NA	IPR000569 HECT domain;IPR035983 HECT, E3 ligase catalytic domain	go_function:GO:0004842 ubiquitin-protein transferase activity	NA	NA	NA	Adra	Adra-UP g56487	Adra-UP g56487
g41327	Adra	March	8.77795251206539	6.81727753385899	9.18588101986973e-08	7.3308814646632e-06	1479	2044	3498	3035	345	53	578	193	0	43	0	16	5326	10847	3368	4192	Scaffold_1879	5071120	5077760	aga	IPR006035 Ureohydrolase;IPR014033 Arginase;IPR020855 Ureohydrolase, manganese-binding site;IPR023696 Ureohydrolase domain superfamily	go_function:GO:0046872 metal ion binding;go_process:GO:0006525 arginine metabolic process;go_function:GO:0004053 arginase activity;go_function:GO:0016813 hydrolase activity, acting on carbon-nitrogen (but not peptide) bonds, in linear amidines	Arginase-1	NA	NA	Adra	Adra-UP g41327 aga	Adra-UP g41327
g49930	Adra	March	2.27817307917444	4.03255254920622	1.00158075809268e-07	7.88572612595496e-06	216	368	260	814	161	211	176	180	207	145	199	131	733	290	905	725	Scaffold_2187	598853	630188	BC3	IPR013087 Zinc finger C2H2-type;IPR036236 Zinc finger C2H2 superfamily	-	Zfp-62	NA	NA	Adra	Adra-UP g49930 BC3	Adra-UP g49930
g57075	Adra	March	2.97046119428478	1.84130505961469	1.23939604543056e-07	9.63934640715234e-06	19	48	71	91	44	25	19	50	15	25	27	28	84	190	286	84	Scaffold_2432	1261049	1261282	NA	NA	NA	NA	NA	NA	Adra	Adra-UP g57075	Adra-UP g57075
g41677	Adra	March	2.66975142006008	0.923434992552339	1.38683555264326e-07	1.06314117562487e-05	19	119	6	82	0	0	0	12	15	16	11	17	87	115	73	48	Scaffold_1886	640025	646227	NA	NA	-	NA	NA	NA	Adra	Adra-UP g41677	Adra-UP g41677
g46785	Adra	March	4.53427758116267	4.79167333262337	1.6967534033707e-07	1.27333901022079e-05	80	132	4241	563	354	293	35	1034	66	63	15	112	1132	3247	237	1190	Scaffold_2067	38381	42012	NA	IPR001314 Peptidase S1A, chymotrypsin family;IPR001254 Serine proteases, trypsin domain;IPR043504 Peptidase S1, PA clan, chymotrypsin-like fold;IPR018114 Serine proteases, trypsin family, histidine active site;IPR009003 Peptidase S1, PA clan	go_process:GO:0006508 proteolysis;go_function:GO:0004252 serine-type endopeptidase activity	NA	NA	NA	Adra	Adra-UP g46785	Adra-UP g46785
g8153	Adra	March	2.28064215562167	0.838848252354048	1.80230146955988e-07	1.33845916079676e-05	29	48	97	47	17	20	18	24	17	23	24	9	64	91	46	101	Scaffold_344	220944	234467	NA	IPR003879 Butyrophylin-like, SPRY domain;IPR006574 SPRY-associated;IPR013083 Zinc finger, RING/FYVE/PHD-type;IPR043136 B30.2/SPRY domain superfamily;IPR013320 Concanavalin A-like lectin/glucanase domain superfamily	-	NA	NA	NA	Adra	Adra-UP g8153	Adra-UP g8153
g43104	Adra	March	2.06937964027246	3.73757023643376	2.17541233520753e-07	1.58797675854671e-05	87	214	217	122	150	148	117	430	125	150	207	141	331	292	757	841	Scaffold_1926	344371	346018	cph	IPR000425 Major intrinsic protein;IPR023271 Aquaporin-like;IPR034294 Aquaporin transporter;IPR022357 Major intrinsic protein, conserved site	go_process:GO:0055085 transmembrane transport;go_component:GO:0016020 membrane;go_function:GO:0015267 channel activity	Lens fiber major intrinsic protein	ADH water channel	hyperosmotic salinity response; renal system process; renal water homeostasis; renal water transport; potassium ion transport; water transport; cell volume homeostasis; hyperosmotic response; cellular water homeostasis; water homeostasis; water transport; organismal water homeostasis; renal water absorption; cellular response to salt stress; cellular hyperosmotic response; cellular hypotonic resp…	Adra	Adra-UP g43104 cph	Adra-UP g43104 ADH water channel
g23173	Adra	March	8.03126522400957	4.7977715676468	2.30202052607264e-07	1.6718002896107e-05	0	13	0	0	0	4	0	5	11	7	3	4	476	5910	72	98	Scaffold_1030	36695	51130	tsc	IPR004841 Amino acid permease/ SLC12A domain;IPR013612 Amino acid permease, N-terminal	go_process:GO:0055085 transmembrane transport;go_component:GO:0016020 membrane	Bumetanide-sensitive sodium-(potassium)-chloride cotransporter 2	Bumetanide-sensitive sodium-(potassium)-chloride cotransporter 2	cellular hyperosmotic salinity response; potassium, sodium and chloride transmembrane ion transport; cellular ion homeostasis; cell volume homeostasis; hyperosmotic response	Adra	Adra-UP g23173 tsc	Adra-UP g23173 Bumetanide-sensitive sodium-(potassium)-chloride cotransporter 2
g72009	Adra	March	3.84872283859786	1.33401707198665	2.30587752681484e-07	1.6718002896107e-05	17	51	77	38	11	6	13	13	4	7	7	18	62	72	93	269	Scaffold_2984	237882	238133	NA	NA	NA	NA	NA	NA	Adra	Adra-UP g72009	Adra-UP g72009
g13723	Adra	March	2.20039001809499	1.1592314410115	2.34029455564609e-07	1.69102094446481e-05	50	63	82	120	13	41	28	20	20	29	21	23	90	116	52	114	Scaffold_612	395544	399199	BRAL1	IPR000538 Link domain;IPR013106 Immunoglobulin V-set domain;IPR003599 Immunoglobulin subtype;IPR013783 Immunoglobulin-like fold;IPR016186 C-type lectin-like/link domain superfamily;IPR007110 Immunoglobulin-like domain;IPR016187 C-type lectin fold;IPR036179 Immunoglobulin-like domain superfamily	go_function:GO:0005540 hyaluronic acid binding;go_process:GO:0007155 cell adhesion	Brain link protein 1	NA	NA	Adra	Adra-UP g13723 BRAL1	Adra-UP g13723
g42916	Adra	March	2.10541815688287	1.38364199832961	3.33904661009054e-07	2.30213198484025e-05	10	12	43	50	2	1	23	37	26	26	54	15	90	96	112	128	Scaffold_1910	94596	97560	HSN2	NA	-	Serine/threonine-protein kinase WNK1	Serine/threonine-protein kinase WNK1	regulation of sodium ion transport; positive regulation of systemic arterial blood pressure; ion transport; chloride transport; cell volume homeostasis; hyperosmotic response; osmosensory signaling pathway; positive regulation of sodium ion transport; negative regulation of sodium ion transport; cellular chloride ion homeostasis; positive regulation of ion transmembrane transporter activity; ion …	Adra	Adra-UP g42916 HSN2	Adra-UP g42916 Serine/threonine-protein kinase WNK1
g38302	Adra	March	2.97139597390287	0.828536585560466	3.72097015133384e-07	2.54262330979962e-05	2	13	28	20	13	12	11	26	5	10	24	9	39	127	47	122	Scaffold_1751	1893094	1900561	NA	NA	-	NA	NA	NA	Adra	Adra-UP g38302	Adra-UP g38302
g28275	Adra	March	12.2977829031914	3.48272333070107	4.51267815726108e-07	3.00676512235202e-05	0	0	0	0	0	0	0	853	0	0	0	0	0	989	330	1281	Scaffold_1285	985013	998037	NA	IPR013106 Immunoglobulin V-set domain;IPR003599 Immunoglobulin subtype;IPR003598 Immunoglobulin subtype 2;IPR013783 Immunoglobulin-like fold;IPR013270 CD47 immunoglobulin-like;IPR007110 Immunoglobulin-like domain;IPR036179 Immunoglobulin-like domain superfamily	-	NA	NA	NA	Adra	Adra-UP g28275	Adra-UP g28275
g43576	Adra	March	2.18771821543527	1.37809497039476	6.76695234587333e-07	4.4115291395301e-05	20	20	31	43	42	11	46	58	20	34	18	35	83	158	92	105	Scaffold_1937	690553	702388	NA	IPR013087 Zinc finger C2H2-type;IPR036236 Zinc finger C2H2 superfamily	-	NA	NA	NA	Adra	Adra-UP g43576	Adra-UP g43576
g33543	Adra	March	10.0722180590977	1.27012524263434	8.15898036138005e-07	5.20908274534915e-05	0	4	4	8	0	2	4	0	0	0	0	0	218	223	4	18	Scaffold_1492	59326	59811	C3	IPR013106 Immunoglobulin V-set domain;IPR003599 Immunoglobulin subtype;IPR013783 Immunoglobulin-like fold;IPR007110 Immunoglobulin-like domain;IPR036179 Immunoglobulin-like domain superfamily	-	Ig heavy chain Mem5	NA	NA	Adra	Adra-UP g33543 C3	Adra-UP g33543
g38826	Adra	March	3.18959859499777	2.28199981891973	8.48082720045132e-07	5.39845036200157e-05	17	23	22	14	57	36	13	138	28	28	50	14	382	85	138	210	Scaffold_1774	135963	145973	Eeg1	IPR036259 MFS transporter superfamily;IPR027197 Solute carrier family 43 member 3	-	Solute carrier family 43 member 3	NA	NA	Adra	Adra-UP g38826 Eeg1	Adra-UP g38826
g29838	Adra	March	9.45965297011318	0.661781730896063	1.07349760561142e-06	6.54130107943503e-05	12	18	572	4	0	0	0	0	0	0	0	0	118	9	142	9	Scaffold_1340	655974	661727	NA	IPR013783 Immunoglobulin-like fold	-	NA	NA	NA	Adra	Adra-UP g29838	Adra-UP g29838
g18561	Adra	March	2.2063450977558	4.57688338040346	1.10582234823112e-06	6.71912738180883e-05	227	491	433	1192	220	514	303	704	327	175	233	274	487	2395	686	777	Scaffold_754	6926	19088	NA	IPR000315 B-box-type zinc finger;IPR006574 SPRY-associated;IPR043136 B30.2/SPRY domain superfamily;IPR041577 Reverse transcriptase/retrotransposon-derived protein, RNase H-like domain;IPR043128 Reverse transcriptase/Diguanylate cyclase domain;IPR036397 Ribonuclease H superfamily;IPR013083 Zinc finger, RING/FYVE/PHD-type;IPR000477 Reverse transcriptase domain;IPR041588 Integrase zinc-binding domai…	go_function:GO:0008270 zinc ion binding;go_function:GO:0003676 nucleic acid binding;go_process:GO:0015074 DNA integration	NA	NA	NA	Adra	Adra-UP g18561	Adra-UP g18561
g48293	Adra	March	2.5089740236802	0.216558519673432	1.16218721416922e-06	7.00193243285953e-05	8	2	28	14	22	19	52	0	13	6	9	11	25	52	49	74	Scaffold_2121	595822	618401	NA	NA	-	NA	NA	NA	Adra	Adra-UP g48293	Adra-UP g48293
g45834	Adra	March	3.362120454628	-0.372871545569134	1.21898043748405e-06	7.24053664697291e-05	8	9	17	52	3	10	6	8	2	4	6	3	9	54	42	36	Scaffold_2033	247009	251541	NA	IPR015095 Alkylated DNA repair protein AlkB, homologue 8, N-terminal	go_function:GO:0016706 2-oxoglutarate-dependent dioxygenase activity;go_function:GO:0008168 methyltransferase activity	NA	NA	NA	Adra	Adra-UP g45834	Adra-UP g45834
g62112	Adra	March	4.48293868689629	0.740082616704699	1.25767692341023e-06	7.41024629143197e-05	31	41	127	189	7	19	9	14	4	2	9	2	46	13	109	152	Scaffold_2607	1495949	1498019	NA	IPR029526 PiggyBac transposable element-derived protein	-	NA	NA	NA	Adra	Adra-UP g62112	Adra-UP g62112
g55707	Adra	March	2.04292638071054	1.9074796999365	1.37642297351224e-06	7.93502279177353e-05	34	38	127	75	89	138	24	140	27	56	49	42	127	203	186	93	Scaffold_2391	1241237	1267071	tsc	IPR002443 Solute carrier family 12 member 1/2;IPR018491 SLC12A transporter, C-terminal;IPR004842 SLC12A transporter family;IPR004841 Amino acid permease/ SLC12A domain;IPR002444 Solute carrier family 12 member 2	go_process:GO:0006811 ion transport;go_function:GO:0022857 transmembrane transporter activity;go_component:GO:0016020 membrane;go_function:GO:0015377 cation:chloride symporter activity;go_component:GO:0016021 integral component of membrane;go_process:GO:0055085 transmembrane transport	Bumetanide-sensitive sodium-(potassium)-chloride cotransporter 2	Bumetanide-sensitive sodium-(potassium)-chloride cotransporter 2	cellular hyperosmotic salinity response; potassium, sodium and chloride transmembrane ion transport; cellular ion homeostasis; cell volume homeostasis; hyperosmotic response	Adra	Adra-UP g55707 tsc	Adra-UP g55707 Bumetanide-sensitive sodium-(potassium)-chloride cotransporter 2
g61917	Adra	March	3.50632055116873	2.08172103951031	1.52481756845883e-06	8.71386777663269e-05	29	48	55	84	68	16	30	54	9	39	23	12	175	468	113	62	Scaffold_2604	905168	922406	NA	NA	NA	NA	NA	NA	Adra	Adra-UP g61917	Adra-UP g61917
g36631	Adra	March	3.40175125617716	1.23289459051849	1.52781953255903e-06	8.71386777663269e-05	10	0	0	35	20	143	15	30	15	21	14	0	74	106	125	132	Scaffold_1663	6030790	6046531	NA	NA	-	NA	NA	NA	Adra	Adra-UP g36631	Adra-UP g36631
g29771	Adra	March	5.59646329889792	1.80308982533518	1.69853798731185e-06	9.54357975490152e-05	95	0	0	3	46	3	0	4	8	0	3	5	245	19	81	317	Scaffold_1339	649664	660957	NA	IPR000315 B-box-type zinc finger	go_function:GO:0008270 zinc ion binding	NA	NA	NA	Adra	Adra-UP g29771	Adra-UP g29771
g46502	Adra	March	2.36949146029687	3.61608544039541	1.70172846395181e-06	9.54357975490152e-05	106	223	202	684	178	449	171	425	135	84	133	123	198	1321	376	401	Scaffold_2061	122781	124442	NA	IPR003879 Butyrophylin-like, SPRY domain;IPR001841 Zinc finger, RING-type;IPR000315 B-box-type zinc finger;IPR006574 SPRY-associated;IPR013083 Zinc finger, RING/FYVE/PHD-type;IPR043136 B30.2/SPRY domain superfamily;IPR017907 Zinc finger, RING-type, conserved site;IPR001870 B30.2/SPRY domain;IPR013320 Concanavalin A-like lectin/glucanase domain superfamily	go_function:GO:0008270 zinc ion binding	NA	NA	NA	Adra	Adra-UP g46502	Adra-UP g46502
g46175	Adra	March	4.1778312242266	0.778297455552416	1.70452939329174e-06	9.54357975490152e-05	14	29	89	107	2	22	12	17	4	4	13	1	43	21	124	137	Scaffold_2050	84438	86118	NA	IPR029526 PiggyBac transposable element-derived protein	-	NA	NA	NA	Adra	Adra-UP g46175	Adra-UP g46175
g33559	Adra	March	3.4704124051135	1.17930870515446	1.76743640777168e-06	9.79324608534217e-05	84	3	18	26	7	25	0	6	11	12	8	12	33	60	235	86	Scaffold_1494	51111	60797	DHP1	IPR016202 Deoxyribonuclease I;IPR005135 Endonuclease/exonuclease/phosphatase;IPR036691 Endonuclease/exonuclease/phosphatase superfamily;IPR018057 Deoxyribonuclease I, active site	go_process:GO:0006308 DNA catabolic process;go_function:GO:0004536 deoxyribonuclease activity;go_function:GO:0003824 catalytic activity	DNase I	NA	NA	Adra	Adra-UP g33559 DHP1	Adra-UP g33559
g9554	Adra	March	2.02559895517469	3.72744963915625	1.77438177202794e-06	9.80632489409136e-05	82	205	164	262	289	211	266	298	149	164	202	123	253	298	683	1009	Scaffold_398	3361397	3366587	BN51	IPR007811 DNA-directed RNA polymerase III subunit RPC4	go_function:GO:0003677 DNA binding;go_process:GO:0006383 transcription by RNA polymerase III;go_component:GO:0005666 RNA polymerase III complex	DNA-directed RNA polymerase III subunit D	NA	NA	Adra	Adra-UP g9554 BN51	Adra-UP g9554
g71131	Adra	March	3.31253103323988	-0.847715301689564	1.7949127754169e-06	9.86879034463152e-05	8	0	0	33	20	23	7	16	3	3	5	0	23	27	26	16	Scaffold_2955	128402	145703	NA	NA	-	NA	NA	NA	Adra	Adra-UP g71131	Adra-UP g71131
g35970	Adra	March	2.55344781949507	1.231590120007	1.94307809794893e-06	0.000105746957656315	0	34	109	55	38	54	42	44	18	31	15	16	53	79	78	212	Scaffold_1637	12157	13667	DACH	NA	-	Dach1	NA	NA	Adra	Adra-UP g35970 DACH	Adra-UP g35970
g20111	Adra	March	6.29321264588109	0.980796143722303	2.07603619853089e-06	0.000111563472899946	12	26	76	70	9	0	0	0	2	0	0	3	141	120	5	119	Scaffold_839	94091	98853	NA	NA	-	NA	NA	NA	Adra	Adra-UP g20111	Adra-UP g20111
g71752	Adra	March	3.13958938487194	3.37973352561573	2.09985710086308e-06	0.000112560761085864	9	20	69	119	45	22	23	97	75	74	92	25	164	155	589	1088	Scaffold_2977	1042762	1080742	mtgr1	IPR013289 CBFA2T family;IPR013290 Protein CBFA2T1;IPR003894 TAFH/NHR1;IPR002893 Zinc finger, MYND-type;IPR037249 TAFH/NHR1 domain superfamily;IPR014896 NHR2-like	go_function:GO:0003714 transcription corepressor activity;go_process:GO:0045892 negative regulation of transcription, DNA-templated;go_process:GO:0006351 transcription, DNA-templated	MTG8-like protein	NA	NA	Adra	Adra-UP g71752 mtgr1	Adra-UP g71752
g47831	Adra	March	2.54167488723525	1.74865350400142	2.28228980330649e-06	0.00012112559382908	13	43	70	33	145	180	38	92	11	27	67	18	154	180	116	125	Scaffold_2105	31284	39742	NA	IPR011115 SecA DEAD-like, N-terminal;IPR001650 Helicase, C-terminal;IPR000185 Protein translocase subunit SecA;IPR014018 SecA motor DEAD;IPR027417 P-loop containing nucleoside triphosphate hydrolase	go_process:GO:0017038 protein import;go_function:GO:0005524 ATP binding;go_component:GO:0016020 membrane;go_process:GO:0006886 intracellular protein transport;go_process:GO:0006605 protein targeting	NA	NA	NA	Adra	Adra-UP g47831	Adra-UP g47831
g13523	Adra	March	4.61951774125092	-0.980795479030409	2.37223324794565e-06	0.000125587437393717	26	12	12	81	0	18	4	12	0	0	4	0	20	28	29	11	Scaffold_605	1569036	1571885	NA	IPR036397 Ribonuclease H superfamily;IPR008042 Retrotransposon, Pao;IPR041588 Integrase zinc-binding domain;IPR012337 Ribonuclease H-like superfamily	go_function:GO:0003676 nucleic acid binding	NA	NA	NA	Adra	Adra-UP g13523	Adra-UP g13523
g17357	Adra	March	4.66181510372232	3.28780740836151	2.58776331030526e-06	0.000135027037959634	24	388	108	368	64	73	37	96	6	16	9	49	642	681	61	529	Scaffold_716	3410603	3432647	NA	IPR006703 AIG1-type guanine nucleotide-binding (G) domain;IPR027417 P-loop containing nucleoside triphosphate hydrolase	go_function:GO:0005525 GTP binding	NA	NA	NA	Adra	Adra-UP g17357	Adra-UP g17357
g69449	Adra	March	2.83951896473621	1.82742589448663	2.59473127928789e-06	0.000135027037959634	0	0	104	57	15	27	13	60	40	34	9	19	143	261	58	191	Scaffold_2878	45322	65531	mhcA	IPR001609 Myosin head, motor domain;IPR036961 Kinesin motor domain superfamily;IPR027417 P-loop containing nucleoside triphosphate hydrolase	go_function:GO:0003774 motor activity;go_function:GO:0005524 ATP binding;go_component:GO:0016459 myosin complex	MyHC-beta	NA	NA	Adra	Adra-UP g69449 mhcA	Adra-UP g69449
g40969	Adra	March	8.85376895939661	0.0909231275273131	2.61764056248433e-06	0.000135888583374793	0	0	0	0	0	2	0	0	0	0	0	0	87	99	3	13	Scaffold_1871	3831	5369	NA	NA	NA	NA	NA	NA	Adra	Adra-UP g40969	Adra-UP g40969
g47913	Adra	March	5.15209415528002	3.92520845487117	2.66551397834794e-06	0.000137694106049705	401	1490	3273	2979	841	1172	853	967	12	54	0	29	1179	543	616	457	Scaffold_2105	1033374	1055231	tsc	IPR002948 Thiazide-sensitive Na-K-Cl co-transporter;IPR018491 SLC12A transporter, C-terminal;IPR004841 Amino acid permease/ SLC12A domain;IPR004842 SLC12A transporter family	go_process:GO:0006811 ion transport;go_component:GO:0016020 membrane;go_function:GO:0022857 transmembrane transporter activity;go_process:GO:0055085 transmembrane transport;go_function:GO:0015377 cation:chloride symporter activity;go_component:GO:0016021 integral component of membrane	Bumetanide-sensitive sodium-(potassium)-chloride cotransporter 2	Bumetanide-sensitive sodium-(potassium)-chloride cotransporter 2	cellular hyperosmotic salinity response; potassium, sodium and chloride transmembrane ion transport; cellular ion homeostasis; cell volume homeostasis; hyperosmotic response	Adra	Adra-UP g47913 tsc	Adra-UP g47913 Bumetanide-sensitive sodium-(potassium)-chloride cotransporter 2
g54628	Adra	March	6.24724319503837	3.36106430339823	2.80069278345843e-06	0.00014330434749428	17	5	7	38	0	6	0	4	8	17	0	6	984	737	36	175	Scaffold_2353	944557	954245	NA	IPR023412 Ribonuclease A-domain;IPR036816 Ribonuclease A-like domain superfamily;IPR001427 Pancreatic ribonuclease;IPR023411 Ribonuclease A, active site	go_function:GO:0003676 nucleic acid binding	NA	NA	NA	Adra	Adra-UP g54628	Adra-UP g54628
g30710	Adra	March	2.61437385706642	4.16878579816083	2.81022364620927e-06	0.000143448838532515	98	278	528	353	612	187	150	250	104	112	206	181	473	578	1638	389	Scaffold_1371	546483	585619	mao	IPR001613 Flavin amine oxidase;IPR002937 Amine oxidase;IPR036188 FAD/NAD(P)-binding domain superfamily	go_function:GO:0016491 oxidoreductase activity	Amine oxidase [flavin-containing] A	NA	NA	Adra	Adra-UP g30710 mao	Adra-UP g30710
g45879	Adra	March	2.51632347609801	4.57760692743907	2.82261991821346e-06	0.000143738559073213	222	381	562	588	844	446	367	849	209	252	204	190	268	802	2147	1010	Scaffold_2036	43060	68022	Mdt1	IPR002347 Short-chain dehydrogenase/reductase SDR;IPR036291 NAD(P)-binding domain superfamily	go_function:GO:0016491 oxidoreductase activity	Dehydrogenase/reductase SDR family member 13	NA	NA	Adra	Adra-UP g45879 Mdt1	Adra-UP g45879
g4922	Adra	March	2.23963118566618	1.96269190080546	3.48755586089902e-06	0.000173066925180762	17	27	364	62	57	33	20	107	70	29	39	26	171	260	80	149	Scaffold_216	475792	476992	NA	IPR001604 DNA/RNA non-specific endonuclease;IPR020821 Extracellular Endonuclease, subunit A;IPR039015 Endonuclease domain-containing 1 protein	go_function:GO:0016787 hydrolase activity;go_function:GO:0003676 nucleic acid binding;go_function:GO:0046872 metal ion binding	NA	NA	NA	Adra	Adra-UP g4922	Adra-UP g4922
g70235	Adra	March	2.11179223415489	1.14522784057865	4.58481161722994e-06	0.00021937349187766	26	30	46	206	31	8	10	30	15	34	28	21	48	84	85	157	Scaffold_2913	923289	923663	zgc:112234	IPR000558 Histone H2B;IPR009072 Histone-fold;IPR007125 Histone H2A/H2B/H3	go_function:GO:0003677 DNA binding;go_component:GO:0000786 nucleosome;go_function:GO:0046982 protein heterodimerization activity	Histone H2B 1/2	NA	NA	Adra	Adra-UP g70235 zgc:112234	Adra-UP g70235
g21366	Adra	March	3.58889144030261	4.29084327011902	5.22546914719322e-06	0.000247810053481527	272	423	573	987	810	348	339	588	93	92	109	72	930	2514	265	151	Scaffold_906	225502	233362	NAC1	IPR018379 BEN domain;IPR000210 BTB/POZ domain;IPR011333 SKP1/BTB/POZ domain superfamily	go_function:GO:0005515 protein binding	BTB/POZ domain-containing protein 14A	NA	NA	Adra	Adra-UP g21366 NAC1	Adra-UP g21366
g43622	Adra	March	11.727956121693	2.9188882926359	5.47955153825988e-06	0.000257666088142494	0	0	831	0	0	18	0	179	0	0	0	0	0	1010	41	756	Scaffold_1941	13336	17870	NA	NA	-	NA	NA	NA	Adra	Adra-UP g43622	Adra-UP g43622
g21605	Adra	March	2.47875033244619	1.25320903169983	5.54002172566915e-06	0.000259846457606605	18	30	175	89	81	55	19	105	8	23	19	32	63	139	69	154	Scaffold_934	184744	186003	NA	IPR003879 Butyrophylin-like, SPRY domain;IPR006574 SPRY-associated;IPR000315 B-box-type zinc finger;IPR043136 B30.2/SPRY domain superfamily;IPR001870 B30.2/SPRY domain;IPR013320 Concanavalin A-like lectin/glucanase domain superfamily	go_function:GO:0008270 zinc ion binding	NA	NA	NA	Adra	Adra-UP g21605	Adra-UP g21605
g43061	Adra	March	2.47852314185097	2.19637361912347	5.70601611992185e-06	0.000267046548737174	32	36	55	88	100	161	52	89	30	65	60	18	147	206	326	95	Scaffold_1918	936021	953515	NA	IPR001025 Bromo adjacent homology (BAH) domain;IPR008042 Retrotransposon, Pao;IPR040676 Domain of unknown function DUF5641;IPR036397 Ribonuclease H superfamily;IPR043128 Reverse transcriptase/Diguanylate cyclase domain;IPR041588 Integrase zinc-binding domain;IPR043151 Bromo adjacent homology (BAH) domain superfamily;IPR001584 Integrase, catalytic core;IPR043502 DNA/RNA polymerase superfamily;IPR0…	go_function:GO:0003682 chromatin binding;go_function:GO:0003676 nucleic acid binding;go_process:GO:0015074 DNA integration	NA	NA	NA	Adra	Adra-UP g43061	Adra-UP g43061
g21100	Adra	March	3.65001344081929	0.778298184535706	6.40273795363514e-06	0.000295770538557988	25	51	123	147	4	32	15	22	5	5	18	3	39	25	146	104	Scaffold_899	756552	758380	NA	IPR029526 PiggyBac transposable element-derived protein	-	NA	NA	NA	Adra	Adra-UP g21100	Adra-UP g21100
g70755	Adra	March	3.95083692284975	2.96719027708429	6.54915404741171e-06	0.000301232917776434	19	27	196	56	16	145	70	314	38	31	54	0	361	549	362	222	Scaffold_2930	2462808	2482881	NA	IPR003961 Fibronectin type III;IPR013783 Immunoglobulin-like fold;IPR036116 Fibronectin type III superfamily	go_function:GO:0005515 protein binding	NA	NA	NA	Adra	Adra-UP g70755	Adra-UP g70755
g14748	Adra	March	2.71036853197929	7.66800113030666	7.6378311724962e-06	0.000347570070462444	483	1706	1138	3092	372	377	473	1343	1620	901	2804	1360	3387	3142	13939	16670	Scaffold_629	2448524	2457215	nt5c2	IPR008380 HAD-superfamily hydrolase, subfamily IG, 5'-nucleotidase;IPR023214 HAD superfamily;IPR016695 Purine 5'-nucleotidase;IPR036412 HAD-like superfamily	-	Cytosolic 5'-nucleotidase II	NA	NA	Adra	Adra-UP g14748 nt5c2	Adra-UP g14748
g43078	Adra	March	8.82347196201996	0.0975215789019802	7.83157854036795e-06	0.000354126430912029	0	0	77	0	35	0	12	113	0	0	0	0	0	76	50	102	Scaffold_1925	50275	66639	NA	IPR013783 Immunoglobulin-like fold;IPR036179 Immunoglobulin-like domain superfamily	-	NA	NA	NA	Adra	Adra-UP g43078	Adra-UP g43078
g28657	Adra	March	2.71817208275323	1.08838185370166	7.99277603864733e-06	0.000360652940748078	6	10	132	80	14	25	3	70	25	24	12	6	102	144	35	93	Scaffold_1302	477967	479511	NA	IPR020974 CGT/MARTX, cysteine protease (CPD) domain;IPR038383 CGT/MARTX, cysteine protease (CPD) domain superfamily	-	NA	NA	NA	Adra	Adra-UP g28657	Adra-UP g28657
g59536	Adra	March	2.48146770403621	0.0851493207695313	8.274684448669e-06	0.000370248851439608	10	13	19	32	9	0	13	19	10	11	6	9	35	28	41	72	Scaffold_2527	1301780	1306833	NA	IPR003599 Immunoglobulin subtype;IPR013783 Immunoglobulin-like fold;IPR036179 Immunoglobulin-like domain superfamily	-	NA	NA	NA	Adra	Adra-UP g59536	Adra-UP g59536
g46853	Adra	March	3.85041821144507	1.37373052272204	8.68317604436369e-06	0.000386103470346883	46	56	111	114	267	48	7	17	16	0	19	6	142	185	101	51	Scaffold_2068	705892	722599	NA	NA	-	NA	NA	NA	Adra	Adra-UP g46853	Adra-UP g46853
g1406	Adra	March	2.01266251729637	3.78929664804837	8.73759698602419e-06	0.000386914543140963	839	936	2408	2233	852	1006	759	1090	178	184	243	82	572	1055	407	253	Scaffold_78	798933	817460	Trh1	IPR006634 TRAM/LAG1/CLN8 homology domain;IPR001356 Homeobox domain;IPR016439 Sphingosine N-acyltransferase Lag1/Lac1-like;IPR009057 Homeobox-like domain superfamily	go_component:GO:0016021 integral component of membrane;go_function:GO:0003677 DNA binding;go_function:GO:0050291 sphingosine N-acyltransferase activity;go_process:GO:0046513 ceramide biosynthetic process	CerS2	NA	NA	Adra	Adra-UP g1406 Trh1	Adra-UP g1406
g6360	Adra	March	2.06117480890322	2.02610278461206	8.99654564384154e-06	0.000395922053972187	69	81	265	133	39	22	38	80	33	37	68	50	219	156	152	107	Scaffold_262	211824	218996	NA	NA	-	NA	NA	NA	Adra	Adra-UP g6360	Adra-UP g6360
g18348	Adra	March	2.18906105406077	5.26033486512376	9.25115341237802e-06	0.000405458338491683	256	300	895	588	1199	951	351	2952	353	763	312	253	745	3524	1601	994	Scaffold_748	1728047	1741695	SCD	IPR015876 Acyl-CoA desaturase;IPR005804 Fatty acid desaturase domain;IPR001522 Fatty acid desaturase type 1, conserved site	go_function:GO:0016717 oxidoreductase activity, acting on paired donors, with oxidation of a pair of donors resulting in the reduction of molecular oxygen to two molecules of water;go_process:GO:0006629 lipid metabolic process	Stearoyl-CoA desaturase	NA	NA	Adra	Adra-UP g18348 SCD	Adra-UP g18348
g54788	Adra	March	2.79841815110807	0.0140321519629061	9.29170679845541e-06	0.0004064029141214	4	7	15	5	9	14	6	17	7	5	11	6	52	70	19	30	Scaffold_2362	24673	27107	NA	IPR002156 Ribonuclease H domain;IPR036397 Ribonuclease H superfamily;IPR043128 Reverse transcriptase/Diguanylate cyclase domain;IPR012337 Ribonuclease H-like superfamily;IPR043502 DNA/RNA polymerase superfamily	go_function:GO:0003676 nucleic acid binding;go_function:GO:0004523 RNA-DNA hybrid ribonuclease activity	NA	NA	NA	Adra	Adra-UP g54788	Adra-UP g54788
g60147	Adra	March	8.34680432827096	6.0373394841266	9.80265892520794e-06	0.000427004621369343	0	42	0	14	0	0	2	0	14	29	0	5	1020	14158	192	203	Scaffold_2541	2931	23036	tsc	IPR004841 Amino acid permease/ SLC12A domain;IPR018491 SLC12A transporter, C-terminal	go_process:GO:0055085 transmembrane transport;go_component:GO:0016020 membrane;go_process:GO:0006811 ion transport;go_function:GO:0022857 transmembrane transporter activity	Na-Cl symporter	NA	NA	Adra	Adra-UP g60147 tsc	Adra-UP g60147
g49942	Adra	March	4.87794346340895	-0.300737722268831	1.04217208154701e-05	0.00045030255515409	0	0	19	18	11	0	0	24	0	0	0	5	29	33	57	29	Scaffold_2187	772606	774849	NA	NA	-	NA	NA	NA	Adra	Adra-UP g49942	Adra-UP g49942
g20763	Adra	March	2.0864871075622	1.84209576474624	1.1725927877033e-05	0.000496622070166302	69	102	63	218	60	15	29	57	48	65	29	22	85	160	98	275	Scaffold_875	2368134	2380601	GARNL4	IPR003109 GoLoco motif;IPR035974 Rap/Ran-GAP superfamily;IPR000331 Rap/Ran-GAP domain	go_function:GO:0030695 GTPase regulator activity;go_process:GO:0051056 regulation of small GTPase mediated signal transduction;go_function:GO:0005096 GTPase activator activity	GTPase-activating Rap/Ran-GAP domain-like protein 4	NA	NA	Adra	Adra-UP g20763 GARNL4	Adra-UP g20763
g51923	Adra	March	2.03823247347905	3.969903243776	1.17623699199555e-05	0.000497180964126497	133	328	388	637	476	329	251	640	165	122	413	87	474	1260	452	508	Scaffold_2261	537883	552593	TRPM2	IPR002153 Transient receptor potential channel, canonical;IPR029581 Transient receptor potential cation channel subfamily M member 4	go_process:GO:0070588 calcium ion transmembrane transport;go_function:GO:0005262 calcium channel activity;go_component:GO:0016020 membrane;go_component:GO:0016021 integral component of membrane;go_process:GO:0034220 ion transmembrane transport;go_process:GO:0006812 cation transport;go_process:GO:0002724 regulation of T cell cytokine production;go_function:GO:0005227 calcium activated cation chann…	Calcium-activated non-selective cation channel 1	NA	NA	Adra	Adra-UP g51923 TRPM2	Adra-UP g51923
g40464	Adra	March	2.69700237463333	2.85353816347555	1.18571964198097e-05	0.000500200625299586	43	65	385	146	90	141	224	377	25	16	125	69	241	535	226	323	Scaffold_1849	100	4529	NA	IPR013783 Immunoglobulin-like fold;IPR007110 Immunoglobulin-like domain;IPR036179 Immunoglobulin-like domain superfamily	-	NA	NA	NA	Adra	Adra-UP g40464	Adra-UP g40464
g16071	Adra	March	6.07167845215167	0.0748948838619529	1.23069184789895e-05	0.000516110436423989	0	24	36	56	0	0	0	7	3	0	0	0	3	59	52	105	Scaffold_683	4095580	4118107	NA	NA	-	NA	NA	NA	Adra	Adra-UP g16071	Adra-UP g16071
g68006	Adra	March	8.46658294186003	-0.230666439606919	1.30829243641796e-05	0.000545453384602484	0	0	0	0	0	0	33	0	0	0	0	0	0	84	34	62	Scaffold_2823	19069	26535	NA	NA	-	NA	NA	NA	Adra	Adra-UP g68006	Adra-UP g68006
g65158	Adra	March	3.67354086615396	-0.542888140022504	1.36402007330602e-05	0.000565381033485838	7	2	0	12	5	0	0	2	3	0	6	2	38	13	26	39	Scaffold_2717	17269	18228	NA	IPR000477 Reverse transcriptase domain;IPR043128 Reverse transcriptase/Diguanylate cyclase domain;IPR043502 DNA/RNA polymerase superfamily	-	NA	NA	NA	Adra	Adra-UP g65158	Adra-UP g65158
g22231	Adra	March	5.49727430000417	5.13798843858435	1.64849577632545e-05	0.000674149668528655	47	34	131	93	39	444	78	122	34	56	75	26	96	120	997	6669	Scaffold_981	38988	41350	bip	IPR029047 Heat shock protein 70kD, peptide-binding domain superfamily;IPR013126 Heat shock protein 70 family;IPR029048 Heat shock protein 70kD, C-terminal domain superfamily;IPR018181 Heat shock protein 70, conserved site;IPR043129 ATPase, nucleotide binding domain	go_function:GO:0005524 ATP binding;go_function:GO:0016887 ATPase	Heat shock 70 kDa protein	Heat shock 70 kDa protein	negative regulation of vasoconstriction; cellular response to osmotic stress	Adra	Adra-UP g22231 bip	Adra-UP g22231 Heat shock 70 kDa protein
g67657	Adra	March	4.69162225510662	4.82125894448308	1.67789840899221e-05	0.000684864335334453	46	86	59	81	158	121	75	92	36	68	26	106	119	535	4087	748	Scaffold_2812	1656886	1686966	ndvA	IPR003593 AAA+ ATPase domain;IPR003439 ABC transporter-like;IPR011527 ABC transporter type 1, transmembrane domain;IPR036640 ABC transporter type 1, transmembrane domain superfamily;IPR030275 Multidrug resistance protein 3;IPR039421 Type 1 protein exporter;IPR017871 ABC transporter, conserved site;IPR027417 P-loop containing nucleoside triphosphate hydrolase	go_function:GO:0005524 ATP binding;go_component:GO:0016021 integral component of membrane;go_function:GO:0042626 ATPase-coupled transmembrane transporter activity;go_process:GO:0055085 transmembrane transport	ATP-dependent translocase ABCB1	NA	NA	Adra	Adra-UP g67657 ndvA	Adra-UP g67657
g22230	Adra	March	5.24543812621168	4.81113078530139	1.68469800556116e-05	0.000686329922722706	22	28	100	62	42	563	51	62	34	46	63	34	83	94	1009	5017	Scaffold_981	33569	35488	bip	IPR013126 Heat shock protein 70 family;IPR029047 Heat shock protein 70kD, peptide-binding domain superfamily;IPR029048 Heat shock protein 70kD, C-terminal domain superfamily;IPR018181 Heat shock protein 70, conserved site;IPR043129 ATPase, nucleotide binding domain	go_function:GO:0005524 ATP binding;go_function:GO:0016887 ATPase	Heat shock 70 kDa protein	Heat shock 70 kDa protein	negative regulation of vasoconstriction; cellular response to osmotic stress	Adra	Adra-UP g22230 bip	Adra-UP g22230 Heat shock 70 kDa protein
g30931	Adra	March	2.54884738903133	1.60275285323726	1.74488727540371e-05	0.000705475407303111	78	123	14	20	9	22	23	44	21	33	28	23	125	291	41	87	Scaffold_1376	63122	68163	NA	IPR009003 Peptidase S1, PA clan	-	NA	NA	NA	Adra	Adra-UP g30931	Adra-UP g30931
g30350	Adra	March	8.82499849771589	0.0805230713327374	1.81589282338021e-05	0.000730043528316841	0	0	0	0	0	0	0	118	0	0	0	0	54	77	0	82	Scaffold_1357	957531	967015	NA	NA	NA	NA	NA	NA	Adra	Adra-UP g30350	Adra-UP g30350
g34845	Adra	March	2.52693878235215	1.61054750360979	1.96430443136344e-05	0.000779453491243065	78	123	14	28	9	22	23	43	22	34	28	23	125	292	41	88	Scaffold_1583	28766	33822	NA	IPR009003 Peptidase S1, PA clan	-	NA	NA	NA	Adra	Adra-UP g34845	Adra-UP g34845
g60103	Adra	March	2.36619543803369	1.59262626151932	1.98096326570231e-05	0.000784608191237795	26	40	99	99	44	42	62	85	32	39	20	24	69	307	91	77	Scaffold_2539	1204755	1250682	NA	IPR036188 FAD/NAD(P)-binding domain superfamily	-	NA	NA	NA	Adra	Adra-UP g60103	Adra-UP g60103
g37872	Adra	March	5.14042228963484	4.36530552673848	2.04325752769045e-05	0.000806295055391943	17	29	88	43	32	322	45	54	30	39	48	23	65	76	658	3758	Scaffold_1723	31870	34232	bip	IPR029047 Heat shock protein 70kD, peptide-binding domain superfamily;IPR013126 Heat shock protein 70 family;IPR029048 Heat shock protein 70kD, C-terminal domain superfamily;IPR018181 Heat shock protein 70, conserved site;IPR043129 ATPase, nucleotide binding domain	go_function:GO:0005524 ATP binding;go_function:GO:0016887 ATPase	Heat shock 70 kDa protein	Heat shock 70 kDa protein	negative regulation of vasoconstriction; cellular response to osmotic stress	Adra	Adra-UP g37872 bip	Adra-UP g37872 Heat shock 70 kDa protein
g10525	Adra	March	9.97118822204313	1.16182456167966	2.20886417264629e-05	0.000860138010606488	0	0	0	378	172	0	1	339	0	0	0	0	179	3	204	4	Scaffold_458	185695	215161	NA	IPR013106 Immunoglobulin V-set domain;IPR003599 Immunoglobulin subtype;IPR041373 Reverse transcriptase, RNase H-like domain;IPR013783 Immunoglobulin-like fold;IPR043128 Reverse transcriptase/Diguanylate cyclase domain;IPR007110 Immunoglobulin-like domain;IPR043502 DNA/RNA polymerase superfamily;IPR036179 Immunoglobulin-like domain superfamily	-	NA	NA	NA	Adra	Adra-UP g10525	Adra-UP g10525
g43058	Adra	March	2.09887071846374	1.32657184197769	2.50838111249724e-05	0.000963182320181167	14	14	81	96	24	21	110	38	25	52	17	18	61	97	97	167	Scaffold_1918	902247	912774	NA	NA	-	NA	NA	NA	Adra	Adra-UP g43058	Adra-UP g43058
g14360	Adra	March	-12.2653640256369	3.45143253976258	2.51807779766245e-99	5.38566479364045e-95	267	611	825	701	582	552	423	748	616	691	808	539	0	0	0	0	Scaffold_625	2344466	2348305	NA	IPR033214 A-kinase-interacting protein 1	go_process:GO:1901222 regulation of NIK/NF-kappaB signaling	NA	NA	NA	March	March-UP g14360	March-UP g14360
g17026	Adra	March	-13.4960615321125	4.67577784163596	5.88668123104753e-67	4.19681127232148e-63	0	10	38	9	46	46	24	0	2566	1069	1640	991	0	0	0	0	Scaffold_710	1527347	1547342	cyc	IPR002327 Cytochrome c, class IA/ IB;IPR008160 Collagen triple helix repeat;IPR009056 Cytochrome c-like domain;IPR011936 Myxococcus cysteine-rich repeat;IPR036909 Cytochrome c-like domain superfamily	go_function:GO:0009055 electron transfer activity;go_function:GO:0020037 heme binding	Cytochrome c	NA	NA	March	March-UP g17026 cyc	March-UP g17026
g48008	Adra	March	-11.5892026958203	2.78196661070039	1.42798575949263e-50	5.09029323733805e-47	0	0	0	0	10	0	0	34	589	419	435	235	0	0	0	0	Scaffold_2111	1030147	1035260	NA	NA	-	NA	NA	NA	March	March-UP g48008	March-UP g48008
g19105	Adra	March	-3.26620677630919	9.24346618712177	3.88893557144314e-45	1.03970692502532e-41	395	773	3402	1956	10246	1846	3972	15109	36517	32213	42764	23889	2369	3961	2664	2931	Scaffold_787	4651436	4655690	APOD	IPR002969 Apolipoprotein D;IPR012674 Calycin;IPR000566 Lipocalin/cytosolic fatty-acid binding domain;IPR022272 Lipocalin family conserved site	go_process:GO:0007568 aging;go_process:GO:0006869 lipid transport;go_function:GO:0008289 lipid binding	Apo-D	NA	NA	March	March-UP g19105 APOD	March-UP g19105
g41061	Adra	March	-4.97648017856222	3.02035247329349	3.23587133488767e-40	7.68986845673082e-37	634	713	274	2953	335	130	53	145	554	353	477	482	7	20	12	13	Scaffold_1873	269341	273806	SIAT4	IPR038578 GT29-like superfamiliy;IPR001675 Glycosyl transferase family 29	go_function:GO:0008373 sialyltransferase activity;go_process:GO:0006486 protein glycosylation	Gal-NAc6S	NA	NA	March	March-UP g41061 SIAT4	March-UP g41061
g48011	Adra	March	-3.32329274547607	6.54593939609645	1.65760088813238e-37	3.22297889048867e-34	70	170	441	370	938	1272	1038	2679	5653	4925	6237	3990	287	409	382	720	Scaffold_2111	1083258	1113049	NA	IPR008405 Apolipoprotein L	go_process:GO:0006869 lipid transport;go_component:GO:0005576 extracellular region;go_function:GO:0008289 lipid binding;go_process:GO:0042157 lipoprotein metabolic process	NA	NA	NA	March	March-UP g48011	March-UP g48011
g33360	Adra	March	-3.00842187927712	6.54570077447488	3.11404160719994e-37	5.55026015789936e-34	164	236	480	847	943	1232	568	2011	5503	4240	6161	4336	514	663	385	572	Scaffold_1476	148714	208796	ANO1	IPR007632 Anoctamin;IPR032394 Anoctamin, dimerisation domain;IPR031287 Anoctamin-1	go_function:GO:0046983 protein dimerization activity;go_process:GO:1902476 chloride transmembrane transport;go_process:GO:0034605 cellular response to heat;go_process:GO:0035774 positive regulation of insulin secretion involved in cellular response to glucose stimulus;go_component:GO:0005886 plasma membrane	Anoctamin-1	NA	NA	March	March-UP g33360 ANO1	March-UP g33360
g62322	Adra	March	-10.5116506600016	1.72322295157917	1.80853553227196e-36	2.97545830494097e-33	0	0	0	0	0	0	0	0	243	196	170	167	0	0	0	0	Scaffold_2615	234505	237971	NA	NA	-	NA	NA	NA	March	March-UP g62322	March-UP g62322
g33670	Adra	March	-6.2936978633644	2.59417658079814	1.95271995622882e-35	2.98319817313014e-32	1	1	11	13	391	2	213	279	265	453	508	235	5	6	3	1	Scaffold_1502	194433	195359	NA	IPR003879 Butyrophylin-like, SPRY domain;IPR003877 SPRY domain;IPR006574 SPRY-associated;IPR043136 B30.2/SPRY domain superfamily;IPR001870 B30.2/SPRY domain;IPR013320 Concanavalin A-like lectin/glucanase domain superfamily	go_function:GO:0005515 protein binding	NA	NA	NA	March	March-UP g33670	March-UP g33670
g7002	Adra	March	-4.54732085664605	3.31087902912143	8.2575407400869e-35	1.17741520899319e-31	19	56	89	96	40	52	19	94	669	798	466	370	17	24	24	18	Scaffold_299	162	2105	NA	NA	-	NA	NA	NA	March	March-UP g7002	March-UP g7002
g68311	Adra	March	-2.8162003894805	5.42639530866894	1.30626856436198e-30	1.64343953262201e-27	82	166	331	367	402	1319	366	979	2434	2317	2753	1720	239	272	187	418	Scaffold_2827	775242	792997	NHE1	IPR004709 Na+/H+ exchanger;IPR006153 Cation/H+ exchanger;IPR032103 Sodium/hydrogen exchanger, regulatory region;IPR018422 Cation/H+ exchanger, CPA1 family	go_component:GO:0016021 integral component of membrane;go_function:GO:0015385 sodium:proton antiporter activity;go_process:GO:0055085 transmembrane transport;go_process:GO:0006814 sodium ion transport;go_process:GO:0006885 regulation of pH;go_function:GO:0015299 solute:proton antiporter activity;go_process:GO:0006812 cation transport	Solute carrier family 9 member 1	Solute carrier family 9 member 1	sodium ion transport; cellular sodium ion homeostasis; response to salt stress; sodium ion export across plasma membrane; potassium ion homeostasis; potassium ion transmembrane transport; sodium ion import across plasma membrane	March	March-UP g68311 NHE1	March-UP g68311 Solute carrier family 9 member 1
g49885	Adra	March	-2.79620762930648	4.65184825515952	9.24851794318011e-27	9.41939532232077e-24	132	352	626	330	172	151	28	505	1729	1220	1494	934	137	159	200	147	Scaffold_2187	51124	78236	NA	IPR013106 Immunoglobulin V-set domain;IPR003599 Immunoglobulin subtype;IPR003598 Immunoglobulin subtype 2;IPR013783 Immunoglobulin-like fold;IPR007110 Immunoglobulin-like domain;IPR036179 Immunoglobulin-like domain superfamily	-	NA	NA	NA	March	March-UP g49885	March-UP g49885
g69711	Adra	March	-9.68982106454995	0.927890308395241	1.14114857544166e-25	1.06116894484984e-22	1	30	1	87	8	0	0	0	90	88	147	115	0	0	0	0	Scaffold_2890	753163	757058	NA	IPR006120 Resolvase, HTH domain;IPR012337 Ribonuclease H-like superfamily	go_function:GO:0003677 DNA binding;go_process:GO:0006310 DNA recombination;go_function:GO:0000150 DNA strand exchange activity	NA	NA	NA	March	March-UP g69711	March-UP g69711
g48007	Adra	March	-9.67641985926042	0.916477525729724	2.55119350502549e-25	2.27353861189522e-22	0	0	4	0	0	4	0	35	132	128	120	65	0	0	0	0	Scaffold_2111	1026085	1030083	NA	IPR000477 Reverse transcriptase domain;IPR043502 DNA/RNA polymerase superfamily	-	NA	NA	NA	March	March-UP g48007	March-UP g48007
g53718	Adra	March	-2.01917499149494	4.31245203496046	4.0785112561378e-25	3.48924794985101e-22	136	191	320	385	232	284	168	707	1031	966	1127	759	157	291	170	206	Scaffold_2330	147754	148176	NA	IPR000742 EGF-like domain	-	NA	NA	NA	March	March-UP g53718	March-UP g53718
g48009	Adra	March	-2.38492217727748	6.30042628409888	1.76358841064564e-24	1.39702329358848e-21	240	420	1314	931	722	1016	737	1649	4319	4090	4729	3059	418	949	455	906	Scaffold_2111	1050020	1071720	NA	IPR008405 Apolipoprotein L	go_process:GO:0006869 lipid transport;go_component:GO:0005576 extracellular region;go_function:GO:0008289 lipid binding;go_process:GO:0042157 lipoprotein metabolic process	NA	NA	NA	March	March-UP g48009	March-UP g48009
g50266	Adra	March	-2.83806003034918	6.86592826476722	3.25609298730259e-24	2.48718988615814e-21	199	826	2817	1416	1994	2037	1367	4913	8709	5761	6597	4070	692	628	718	876	Scaffold_2200	103518	104124	NA	IPR006461 PLAC8 motif-containing protein	-	NA	NA	NA	March	March-UP g50266	March-UP g50266
g66381	Adra	March	-3.85203953086025	6.80001799113593	4.92907560639093e-24	3.63527824377549e-21	131	301	392	381	451	324	638	1575	10750	3422	6347	4841	325	465	295	417	Scaffold_2764	432784	439209	impa1	IPR000760 Inositol monophosphatase-like;IPR020552 Inositol monophosphatase, lithium-sensitive;IPR020583 Inositol monophosphatase, metal-binding site;IPR033942 Inositol monophosphatase	go_process:GO:0046855 inositol phosphate dephosphorylation;go_process:GO:0046854 phosphatidylinositol phosphate biosynthetic process;go_function:GO:0008934 inositol monophosphate 1-phosphatase activity	D-galactose 1-phosphate phosphatase	NA	NA	March	March-UP g66381 impa1	March-UP g66381
g41708	Adra	March	-9.48190838571541	0.73014667851662	1.33581684148937e-23	9.52348353525825e-21	0	0	0	118	82	29	76	53	134	96	87	67	0	0	0	0	Scaffold_1888	50288	51280	NA	NA	-	NA	NA	NA	March	March-UP g41708	March-UP g41708
g59401	Adra	March	-7.9784000114024	0.876244438827069	8.74656148967408e-23	6.03456313358546e-20	0	0	0	0	2	0	9	4	158	85	108	76	0	1	0	0	Scaffold_2523	1315372	1316103	NA	IPR004244 Transposase, L1	-	NA	NA	NA	March	March-UP g59401	March-UP g59401
g33357	Adra	March	-2.6995419918037	4.08443220850921	2.9177068770288e-22	1.95012233393413e-19	34	78	89	201	177	190	93	360	990	697	1086	787	114	101	87	161	Scaffold_1476	133277	133927	NA	NA	NA	NA	NA	NA	March	March-UP g33357	March-UP g33357
g33358	Adra	March	-2.79541764609314	4.07075512065631	1.19670603054143e-21	7.52798487682943e-19	19	67	87	156	185	176	145	408	1109	665	1035	750	118	101	82	127	Scaffold_1476	135348	142242	ANO1	IPR007632 Anoctamin;IPR031288 Anoctamin-2	-	Anoctamin-4	NA	NA	March	March-UP g33358 ANO1	March-UP g33358
g5437	Adra	March	-9.24338255445574	0.502925172576608	9.12623213821771e-21	5.0049193069795e-18	1	25	1	70	9	0	0	0	69	58	111	85	0	0	0	0	Scaffold_231	2972294	2975131	NA	IPR036397 Ribonuclease H superfamily;IPR012337 Ribonuclease H-like superfamily	go_function:GO:0003676 nucleic acid binding	NA	NA	NA	March	March-UP g5437	March-UP g5437
g51042	Adra	March	-9.24338255445574	0.502925172576608	9.12623213821771e-21	5.0049193069795e-18	1	25	1	70	9	0	0	0	69	58	111	85	0	0	0	0	Scaffold_2228	1332570	1335407	NA	IPR036397 Ribonuclease H superfamily;IPR012337 Ribonuclease H-like superfamily	go_function:GO:0003676 nucleic acid binding	NA	NA	NA	March	March-UP g51042	March-UP g51042
g55657	Adra	March	-4.41106113534571	3.73061814115	1.27666762070922e-20	6.82634176793219e-18	0	553	1555	887	73	651	13	20	541	1136	1003	456	19	52	11	47	Scaffold_2391	577067	590201	P2x2	IPR003050 P2X7 purinoceptor;IPR001429 P2X purinoreceptor;IPR027309 P2X purinoreceptor extracellular domain superfamily	go_function:GO:0005216 ion channel activity;go_function:GO:0001614 purinergic nucleotide receptor activity;go_component:GO:0016020 membrane;go_process:GO:0006811 ion transport;go_function:GO:0005524 ATP binding;go_process:GO:0033198 response to ATP;go_function:GO:0004931 extracellularly ATP-gated cation channel activity;go_component:GO:0005887 integral component of plasma membrane;go_process:GO:0…	ATP receptor	NA	NA	March	March-UP g55657 P2x2	March-UP g55657
g30909	Adra	March	-9.26597233283223	0.522810251357211	2.03526923834364e-20	1.06171557243155e-17	0	0	0	0	22	25	21	57	94	61	75	92	0	0	0	0	Scaffold_1374	877694	893810	NA	NA	-	NA	NA	NA	March	March-UP g30909	March-UP g30909
g13073	Adra	March	-6.2178050256161	2.77250779872174	2.6443476404229e-20	1.28539334848557e-17	0	0	0	177	19	6	5	15	514	200	778	204	6	4	1	7	Scaffold_568	2808601	2811164	NA	NA	-	NA	NA	NA	March	March-UP g13073	March-UP g13073
g32928	Adra	March	-3.06918248751412	3.38556534523735	5.18662428219383e-20	2.41155478581656e-17	197	170	50	778	296	545	363	299	365	579	861	478	43	77	65	44	Scaffold_1472	199817	237230	NA	IPR008166 Glycosyltransferase family 92	-	NA	NA	NA	March	March-UP g32928	March-UP g32928
g42532	Adra	March	-3.20276095744302	2.77596649729819	3.23949687824125e-19	1.47417785599625e-16	39	105	257	248	123	79	12	245	435	504	384	190	25	35	41	36	Scaffold_1906	3041679	3044706	NA	NA	-	NA	NA	NA	March	March-UP g42532	March-UP g42532
g366	Adra	March	-6.20148274863356	2.75736475655174	3.33887710451917e-19	1.487747989822e-16	0	0	0	175	19	6	5	15	513	191	785	193	6	4	1	7	Scaffold_17	199496	205048	NA	NA	-	NA	NA	NA	March	March-UP g366	March-UP g366
g38784	Adra	March	-6.20375949035612	2.75961677248031	3.61656973381116e-19	1.57859578503578e-16	0	0	0	175	19	6	5	15	513	191	788	193	6	4	1	7	Scaffold_1771	240059	243304	NA	NA	-	NA	NA	NA	March	March-UP g38784	March-UP g38784
g48286	Adra	March	-3.0907285966622	4.10705846948417	9.38578963521286e-19	3.93614252388103e-16	446	377	978	1347	473	529	416	394	1140	910	1230	541	79	69	134	80	Scaffold_2121	496167	502480	BTF2	IPR003879 Butyrophylin-like, SPRY domain;IPR003877 SPRY domain;IPR000315 B-box-type zinc finger;IPR006574 SPRY-associated;IPR001841 Zinc finger, RING-type;IPR003613 U box domain;IPR043136 B30.2/SPRY domain superfamily;IPR013083 Zinc finger, RING/FYVE/PHD-type;IPR018957 Zinc finger, C3HC4 RING-type;IPR017907 Zinc finger, RING-type, conserved site;IPR001870 B30.2/SPRY domain;IPR013320 Concanavalin …	go_function:GO:0005515 protein binding;go_function:GO:0008270 zinc ion binding;go_function:GO:0004842 ubiquitin-protein transferase activity;go_process:GO:0016567 protein ubiquitination;go_function:GO:0046872 metal ion binding	BT	NA	NA	March	March-UP g48286 BTF2	March-UP g48286
g32925	Adra	March	-3.73565467121653	3.87383247395101	1.02236270143658e-18	4.12571574685389e-16	47	102	99	137	613	415	132	496	622	1503	815	419	44	43	50	73	Scaffold_1472	174556	186432	NA	IPR008166 Glycosyltransferase family 92	-	NA	NA	NA	March	March-UP g32925	March-UP g32925
g53000	Adra	March	-7.94761431161536	2.45823391838397	1.31097680160796e-18	5.09803124232564e-16	110	0	93	258	277	89	123	236	217	157	544	387	0	0	4	0	Scaffold_2301	6919	18128	NA	IPR001660 Sterile alpha motif domain;IPR011990 Tetratricopeptide-like helical domain superfamily;IPR013761 Sterile alpha motif/pointed domain superfamily	go_function:GO:0005515 protein binding	NA	NA	NA	March	March-UP g53000	March-UP g53000
g9266	Adra	March	-9.16367248865107	0.429411338255051	1.5714395475251e-18	6.00177661472623e-16	0	0	0	0	109	0	28	92	111	92	61	45	0	0	0	0	Scaffold_385	3058307	3062914	NA	IPR025398 Domain of unknown function DUF4371;IPR012337 Ribonuclease H-like superfamily	-	NA	NA	NA	March	March-UP g9266	March-UP g9266
g17450	Adra	March	-2.30884472801131	5.3025635151568	2.61754258327856e-18	9.82175452125646e-16	133	227	678	427	962	599	326	1407	2631	1650	2330	1438	275	551	266	303	Scaffold_717	406000	407077	gjb1	IPR000500 Connexin;IPR019570 Gap junction protein, cysteine-rich domain;IPR013092 Connexin, N-terminal;IPR038359 Connexin, N-terminal domain superfamily;IPR017990 Connexin, conserved site	go_component:GO:0005922 connexin complex;go_process:GO:0007154 cell communication	Connexin-26	NA	NA	March	March-UP g17450 gjb1	March-UP g17450
g9662	Adra	March	-3.11475276855005	2.63845296819608	3.00856164665764e-18	1.10943304308127e-15	4	35	51	62	50	72	42	100	227	328	441	339	20	31	32	51	Scaffold_407	1895746	2005048	NA	IPR002492 Transposase, Tc1-like;IPR038810 Centlein	go_function:GO:0003677 DNA binding;go_process:GO:0015074 DNA integration;go_process:GO:0006313 transposition, DNA-mediated	NA	NA	NA	March	March-UP g9662	March-UP g9662
g47883	Adra	March	-2.66479623490301	5.21983822446609	1.77380717435342e-17	6.0219345785827e-15	513	681	1354	410	301	830	319	744	2550	2243	2122	1048	287	315	216	207	Scaffold_2105	582586	593573	NA	IPR002589 Macro domain;IPR043472 Macro domain-like;IPR037197 WWE domain superfamily;IPR012317 Poly(ADP-ribose) polymerase, catalytic domain;IPR034401 Protein mono-ADP-ribosyltransferase PARP15;IPR004170 WWE domain	go_function:GO:0003950 NAD+ ADP-ribosyltransferase activity	NA	NA	NA	March	March-UP g47883	March-UP g47883
g14558	Adra	March	-2.87894520538018	3.11280594931302	2.08642456339949e-17	6.86529977876744e-15	61	318	163	406	76	69	46	173	449	496	344	497	38	53	43	82	Scaffold_628	2384430	2397708	CGL2	IPR001314 Peptidase S1A, chymotrypsin family;IPR001254 Serine proteases, trypsin domain;IPR043504 Peptidase S1, PA clan, chymotrypsin-like fold;IPR033116 Serine proteases, trypsin family, serine active site;IPR018114 Serine proteases, trypsin family, histidine active site;IPR009003 Peptidase S1, PA clan	go_process:GO:0006508 proteolysis;go_function:GO:0004252 serine-type endopeptidase activity	Granzyme A	NA	NA	March	March-UP g14558 CGL2	March-UP g14558
g59835	Adra	March	-6.54693646205206	1.02247254058037	1.39559794246506e-16	4.45508190946906e-14	0	0	0	0	0	0	1	1	176	88	147	68	0	4	0	0	Scaffold_2534	455773	456507	NA	IPR004244 Transposase, L1	-	NA	NA	NA	March	March-UP g59835	March-UP g59835
g56468	Adra	March	-4.33268741633555	0.916743541486631	2.45272742864699e-16	7.60274409331909e-14	0	0	9	19	3	83	50	95	133	96	102	86	4	3	7	3	Scaffold_2413	47929	49990	NA	NA	NA	NA	NA	NA	March	March-UP g56468	March-UP g56468
g66944	Adra	March	-2.53147513705482	2.38643922303297	7.74229471837332e-16	2.26838629365163e-13	17	19	26	105	165	85	107	161	292	339	267	178	35	47	29	47	Scaffold_2784	117735	118820	NA	NA	-	NA	NA	NA	March	March-UP g66944	March-UP g66944
g22813	Adra	March	-4.30081675802604	1.83379707105533	2.0874291433879e-15	5.79817331412733e-13	3	3	13	8	24	6	3	12	169	206	162	243	5	6	16	7	Scaffold_1011	247113	249885	NA	NA	-	NA	NA	NA	March	March-UP g22813	March-UP g22813
g36754	Adra	March	-2.48236439246012	4.5076858921958	2.48473730908351e-15	6.8132771239331e-13	57	165	239	194	268	200	268	443	1904	788	1220	801	157	218	153	185	Scaffold_1665	268887	271795	NINJ1	IPR007007 Ninjurin	go_process:GO:0042246 tissue regeneration;go_component:GO:0016021 integral component of membrane;go_process:GO:0007155 cell adhesion	Nerve injury-induced protein 1	NA	NA	March	March-UP g36754 NINJ1	March-UP g36754
g33794	Adra	March	-2.49312211952391	3.2499133489575	4.11839208181253e-15	1.07419719324154e-12	12	28	57	23	94	178	61	232	684	468	536	290	59	65	91	76	Scaffold_1512	73995	108699	NA	IPR020977 Beta-casein-like	-	NA	NA	NA	March	March-UP g33794	March-UP g33794
g36648	Adra	March	-2.11124231002248	7.87760370600118	8.82815132110106e-15	2.24781548161559e-12	9860	10098	6415	27563	6362	3144	2616	4832	10429	14687	14841	7378	1436	3658	1770	2658	Scaffold_1663	6401432	6404457	NA	IPR001229 Jacalin-like lectin domain;IPR036404 Jacalin-like lectin domain superfamily	-	NA	NA	NA	March	March-UP g36648	March-UP g36648
g72814	Adra	March	-2.96317156234954	2.36176406860456	9.66250243090515e-15	2.43131296461411e-12	12	53	72	91	89	81	68	226	405	196	316	187	15	44	28	36	Scaffold_3021	1107597	1132178	NA	IPR038377 Sodium/glucose symporter superfamily;IPR001734 Sodium/solute symporter	go_function:GO:0022857 transmembrane transporter activity;go_process:GO:0055085 transmembrane transport;go_component:GO:0016020 membrane	NA	NA	NA	March	March-UP g72814	March-UP g72814
g61837	Adra	March	-2.22096822865385	9.40668961432474	9.95519535363596e-15	2.47583393283216e-12	21336	22446	25993	48398	18598	18552	10669	15717	30312	37356	45385	24864	3659	9547	4222	8635	Scaffold_2599	1414657	1429680	NA	IPR001916 Glycoside hydrolase, family 22;IPR019799 Glycoside hydrolase family 22 domain;IPR023346 Lysozyme-like domain superfamily	-	NA	NA	NA	March	March-UP g61837	March-UP g61837
g1283	Adra	March	-2.70697967150702	4.67628226082068	1.47441199448156e-14	3.62468088942203e-12	503	2236	1741	1158	657	373	328	1203	946	1495	2434	729	160	180	119	245	Scaffold_75	1920500	1921055	NA	NA	NA	NA	NA	NA	March	March-UP g1283	March-UP g1283
g64342	Adra	March	-8.84978966564639	4.18528053669453	1.88953353305107e-14	4.54082507920183e-12	0	11	2	26	21	130	99	126	244	2443	721	927	0	0	2	6	Scaffold_2687	36729	37550	NA	IPR036397 Ribonuclease H superfamily;IPR002156 Ribonuclease H domain	go_function:GO:0003676 nucleic acid binding;go_function:GO:0004523 RNA-DNA hybrid ribonuclease activity	NA	NA	NA	March	March-UP g64342	March-UP g64342
g46875	Adra	March	-2.939528174948	5.1960448446441	2.86459592003654e-14	6.80755305974905e-12	57	99	282	224	1465	171	112	354	2534	1796	1608	1815	233	352	156	124	Scaffold_2068	1055048	1075232	NA	NA	-	NA	NA	NA	March	March-UP g46875	March-UP g46875
g37364	Adra	March	-2.61008697280205	4.52869721594833	5.16351217618204e-14	1.18394557682631e-11	108	234	323	127	351	239	301	575	970	1915	1076	856	106	172	237	154	Scaffold_1701	667408	673734	cfaD	IPR000668 Peptidase C1A, papain C-terminal;IPR013201 Cathepsin propeptide inhibitor domain (I29);IPR000169 Cysteine peptidase, cysteine active site;IPR025660 Cysteine peptidase, histidine active site;IPR025661 Cysteine peptidase, asparagine active site;IPR039417 Papain-like cysteine endopeptidase;IPR038765 Papain-like cysteine peptidase superfamily	go_process:GO:0006508 proteolysis;go_function:GO:0008234 cysteine-type peptidase activity	Cathepsin L heavy chain	Cathepsin L heavy chain	response to osmotic stress; positive regulation of cation channel activity	March	March-UP g37364 cfaD	March-UP g37364 Cathepsin L heavy chain
g61420	Adra	March	-3.31603259834447	4.01734224850315	7.14417031257848e-14	1.59166161088988e-11	47	55	104	88	103	111	110	202	913	841	1096	729	75	45	123	44	Scaffold_2587	98248	139561	pkpA	IPR013694 VIT domain;IPR000719 Protein kinase domain;IPR024678 Serine/threonine-protein kinase OSR1/WNK, CCT domain;IPR008271 Serine/threonine-protein kinase, active site;IPR011009 Protein kinase-like domain superfamily	go_function:GO:0004672 protein kinase activity;go_process:GO:0006468 protein phosphorylation;go_function:GO:0005524 ATP binding;go_function:GO:0004674 protein serine/threonine kinase activity	Protein kinase with no lysine 1	NA	NA	March	March-UP g61420 pkpA	March-UP g61420
g68842	Adra	March	-8.422902267232	2.93863761665901	4.9615484682587e-13	1.07189493574866e-10	0	0	0	0	1	347	0	0	119	796	303	553	0	0	4	0	Scaffold_2842	1335322	1342037	NA	NA	-	NA	NA	NA	March	March-UP g68842	March-UP g68842
g48281	Adra	March	-7.99205846861217	-0.638222854061237	1.86525066513146e-12	3.79942678341254e-10	44	29	52	76	51	50	27	30	47	31	46	16	0	0	0	0	Scaffold_2121	450665	462737	NA	NA	-	NA	NA	NA	March	March-UP g48281	March-UP g48281
g12151	Adra	March	-6.3539147319643	0.825993986515772	3.96041243787985e-12	7.84308344642353e-10	0	13	0	10	0	60	7	7	147	45	149	73	0	4	0	0	Scaffold_539	191906	250067	grip2	IPR001478 PDZ domain;IPR036034 PDZ superfamily;IPR041489 PDZ domain 6;IPR043545 Glutamate receptor-interacting protein 1/2;IPR030029 Glutamate receptor-interacting protein 2	go_function:GO:0005515 protein binding;go_function:GO:0030159 signaling receptor complex adaptor activity	Glutamate receptor-interacting protein 1	NA	NA	March	March-UP g12151 grip2	March-UP g12151
g52003	Adra	March	-4.38890978739672	1.47447285805016	7.67543349872974e-12	1.41519113509338e-09	15	246	237	124	220	155	39	85	52	168	311	116	6	7	5	7	Scaffold_2264	123501	136212	NA	NA	-	NA	NA	NA	March	March-UP g52003	March-UP g52003
g62489	Adra	March	-4.18510437644981	5.96290133306825	9.02361901266198e-12	1.63556918171877e-09	160	268	1053	574	406	546	368	627	3016	2437	6020	3122	304	124	68	114	Scaffold_2620	672317	673435	IRK1	IPR016449 Potassium channel, inwardly rectifying, Kir;IPR041647 Inward rectifier potassium channel, C-terminal;IPR013518 Potassium channel, inwardly rectifying, Kir, cytoplasmic;IPR040445 Potassium channel, inwardly rectifying, transmembrane domain;IPR003268 Potassium channel, inwardly rectifying, Kir1.1;IPR014756 Immunoglobulin E-set	go_component:GO:0016021 integral component of membrane;go_function:GO:0005242 inward rectifier potassium channel activity;go_process:GO:0006813 potassium ion transport;go_component:GO:0016020 membrane	IRK-1	NA	NA	March	March-UP g62489 IRK1	March-UP g62489
g66659	Adra	March	-3.18773134709136	7.78974318872515	1.99072182352126e-11	3.54812986345606e-09	711	1765	2366	2125	1297	2424	681	3970	18253	9521	12322	8641	1254	661	1610	707	Scaffold_2774	1312390	1313016	cldn7	IPR003549 Claudin-3;IPR004031 PMP-22/EMP/MP20/Claudin superfamily;IPR006187 Claudin	go_component:GO:0005923 bicellular tight junction;go_function:GO:0005198 structural molecule activity;go_component:GO:0016021 integral component of membrane	Claudin-3	Claudin-1	hyperosmotic salinity response	March	March-UP g66659 cldn7	March-UP g66659 Claudin-1
g47888	Adra	March	-2.20279048124614	3.30262589667957	2.16153180505655e-11	3.82073076417764e-09	68	171	256	470	126	332	203	272	406	720	612	265	82	118	84	76	Scaffold_2105	656241	666542	BAL2	IPR012317 Poly(ADP-ribose) polymerase, catalytic domain;IPR002589 Macro domain;IPR043472 Macro domain-like	go_function:GO:0003950 NAD+ ADP-ribosyltransferase activity	ADP-ribosyltransferase diphtheria toxin-like 8	NA	NA	March	March-UP g47888 BAL2	March-UP g47888
g4396	Adra	March	-7.67656024521269	-0.91381791013077	2.29346050491084e-11	4.02069944910107e-09	1	0	0	0	4	11	3	7	18	32	44	18	0	0	0	0	Scaffold_189	596	7382	NA	IPR008042 Retrotransposon, Pao;IPR043502 DNA/RNA polymerase superfamily	-	NA	NA	NA	March	March-UP g4396	March-UP g4396
g26973	Adra	March	-2.62685534319334	3.95928472220647	2.49504836817981e-11	4.30355600795401e-09	259	246	761	311	363	470	486	1059	844	1012	1068	408	148	114	62	106	Scaffold_1207	39075	48170	NA	IPR001611 Leucine-rich repeat;IPR032675 Leucine-rich repeat domain superfamily	go_function:GO:0005515 protein binding	NA	NA	NA	March	March-UP g26973	March-UP g26973
g36163	Adra	March	-5.48484445655133	1.1898314540458	3.06748337532786e-11	5.16593184500097e-09	6	0	4	7	6	0	0	4	137	172	101	108	2	0	7	0	Scaffold_1655	230	20249	NA	NA	-	NA	NA	NA	March	March-UP g36163	March-UP g36163
g24872	Adra	March	-5.24007275746297	-0.499828296507144	4.82914688970307e-11	7.76584914864431e-09	0	0	6	3	11	17	13	39	32	45	44	29	0	0	0	3	Scaffold_1117	128407	130141	NA	IPR025398 Domain of unknown function DUF4371;IPR012337 Ribonuclease H-like superfamily	-	NA	NA	NA	March	March-UP g24872	March-UP g24872
g11433	Adra	March	-6.50843536892231	-0.461482059155383	5.70160005180881e-11	9.03302384504347e-09	0	0	0	0	2	1	0	7	53	18	58	29	0	0	1	0	Scaffold_483	2598636	2599370	NA	IPR004244 Transposase, L1	-	NA	NA	NA	March	March-UP g11433	March-UP g11433
g41892	Adra	March	-4.76934134821911	-0.0664128098868563	6.68140391939039e-11	1.04307932137169e-08	7	2	15	39	20	10	10	46	39	62	84	27	2	2	0	2	Scaffold_1896	565187	566230	NA	IPR025246 Transposase IS30-like HTH domain;IPR038717 Tc1-like transposase, DDE domain;IPR036397 Ribonuclease H superfamily;IPR002492 Transposase, Tc1-like;IPR036388 Winged helix-like DNA-binding domain superfamily;IPR009057 Homeobox-like domain superfamily	go_function:GO:0003676 nucleic acid binding;go_function:GO:0003677 DNA binding;go_process:GO:0015074 DNA integration;go_process:GO:0006313 transposition, DNA-mediated	NA	NA	NA	March	March-UP g41892	March-UP g41892
g55659	Adra	March	-7.92182676699927	-0.698901767328698	9.08488849479325e-11	1.39789636781754e-08	0	22	43	23	3	8	0	0	16	40	58	20	0	0	0	0	Scaffold_2391	598685	603543	NA	NA	-	NA	NA	NA	March	March-UP g55659	March-UP g55659
g24419	Adra	March	-2.14444117556068	5.17010110381178	9.89139494121836e-11	1.49521088313558e-08	234	275	476	424	343	397	552	513	1089	2650	2290	1216	193	467	417	324	Scaffold_1105	72995	77564	NA	IPR016690 tRNA-splicing endonuclease, SEN34 subunit;IPR011856 tRNA endonuclease-like domain superfamily;IPR006676 tRNA-splicing endonuclease;IPR006677 tRNA intron endonuclease, catalytic domain-like;IPR036167 tRNA intron endonuclease, catalytic domain-like superfamily	go_process:GO:0000379 tRNA-type intron splice site recognition and cleavage;go_component:GO:0000214 tRNA-intron endonuclease complex;go_function:GO:0000213 tRNA-intron endonuclease activity;go_function:GO:0004518 nuclease activity;go_function:GO:0003676 nucleic acid binding;go_process:GO:0006388 tRNA splicing, via endonucleolytic cleavage and ligation	NA	NA	NA	March	March-UP g24419	March-UP g24419
g28205	Adra	March	-2.21539656044816	3.15359277716999	1.66980472426652e-10	2.42950907772874e-08	176	300	357	216	380	300	218	411	304	516	609	356	72	129	43	86	Scaffold_1282	840732	853131	CGL1	IPR001314 Peptidase S1A, chymotrypsin family;IPR001254 Serine proteases, trypsin domain;IPR043504 Peptidase S1, PA clan, chymotrypsin-like fold;IPR033116 Serine proteases, trypsin family, serine active site;IPR018114 Serine proteases, trypsin family, histidine active site;IPR009003 Peptidase S1, PA clan	go_process:GO:0006508 proteolysis;go_function:GO:0004252 serine-type endopeptidase activity	Granzyme B	NA	NA	March	March-UP g28205 CGL1	March-UP g28205
g32062	Adra	March	-2.75574381531358	0.979263479693456	1.75827983893079e-10	2.54095197263863e-08	8	62	137	45	14	4	50	35	98	125	85	89	9	12	10	20	Scaffold_1415	111169	113351	NA	IPR003599 Immunoglobulin subtype;IPR013783 Immunoglobulin-like fold;IPR013106 Immunoglobulin V-set domain;IPR036179 Immunoglobulin-like domain superfamily	-	NA	NA	NA	March	March-UP g32062	March-UP g32062
g22416	Adra	March	-2.56452220890712	2.54818742812089	3.60508284839358e-10	5.00685142606765e-08	0	18	45	5	54	0	0	0	279	332	404	207	30	55	17	78	Scaffold_994	455558	458771	NA	IPR008906 HAT, C-terminal dimerisation domain;IPR026630 EPM2A-interacting protein 1;IPR012337 Ribonuclease H-like superfamily	go_function:GO:0046983 protein dimerization activity	NA	NA	NA	March	March-UP g22416	March-UP g22416
g31933	Adra	March	-8.41521794755593	-0.259973697963098	4.17799166830587e-10	5.76508940656296e-08	0	0	9	0	16	89	0	0	89	54	29	14	0	0	0	0	Scaffold_1412	4941486	4948901	NA	IPR036397 Ribonuclease H superfamily;IPR001584 Integrase, catalytic core;IPR000477 Reverse transcriptase domain;IPR041577 Reverse transcriptase/retrotransposon-derived protein, RNase H-like domain;IPR041588 Integrase zinc-binding domain;IPR043128 Reverse transcriptase/Diguanylate cyclase domain;IPR012337 Ribonuclease H-like superfamily;IPR043502 DNA/RNA polymerase superfamily	go_function:GO:0003676 nucleic acid binding;go_process:GO:0015074 DNA integration	NA	NA	NA	March	March-UP g31933	March-UP g31933
g31802	Adra	March	-7.70583849114885	-0.886404811769803	4.31725034575128e-10	5.89902812455895e-08	0	7	0	12	0	0	14	0	43	16	42	14	0	0	0	0	Scaffold_1412	2242083	2247787	NA	IPR008677 MRVI1	-	NA	NA	NA	March	March-UP g31802	March-UP g31802
g24052	Adra	March	-2.53894193079011	2.15219753681985	4.73241014721487e-10	6.36583573764978e-08	94	95	119	224	184	118	64	144	158	167	378	213	23	29	43	37	Scaffold_1077	524760	526406	NA	IPR003879 Butyrophylin-like, SPRY domain;IPR001841 Zinc finger, RING-type;IPR006574 SPRY-associated;IPR000315 B-box-type zinc finger;IPR003877 SPRY domain;IPR043136 B30.2/SPRY domain superfamily;IPR013083 Zinc finger, RING/FYVE/PHD-type;IPR017907 Zinc finger, RING-type, conserved site;IPR001870 B30.2/SPRY domain;IPR013320 Concanavalin A-like lectin/glucanase domain superfamily	go_function:GO:0008270 zinc ion binding;go_function:GO:0005515 protein binding	NA	NA	NA	March	March-UP g24052	March-UP g24052
g14831	Adra	March	-8.02006112299225	-0.608962337254291	4.86742783493374e-10	6.50653415834768e-08	9	9	0	12	19	0	7	21	33	54	49	9	0	0	0	0	Scaffold_629	3904777	3916407	JBTS17	IPR028236 Ciliogenesis and planar polarity effector 1;IPR036322 WD40-repeat-containing domain superfamily	go_function:GO:0005515 protein binding	Ciliogenesis and planar polarity effector 1	NA	NA	March	March-UP g14831 JBTS17	March-UP g14831
g65107	Adra	March	-5.89979655648257	2.65736924955461	5.96433878217336e-10	7.92330918466607e-08	3	6	210	3	4	105	13	64	735	194	295	262	12	4	0	3	Scaffold_2711	12400	17238	NA	IPR010285 DNA helicase Pif1-like;IPR005135 Endonuclease/exonuclease/phosphatase;IPR036691 Endonuclease/exonuclease/phosphatase superfamily;IPR025476 Helitron helicase-like domain;IPR027417 P-loop containing nucleoside triphosphate hydrolase	go_process:GO:0006281 DNA repair;go_function:GO:0003678 DNA helicase activity;go_process:GO:0000723 telomere maintenance;go_function:GO:0003824 catalytic activity	NA	NA	NA	March	March-UP g65107	March-UP g65107
g5914	Adra	March	-2.57872828280962	3.06245276607501	6.71182172859588e-10	8.80689835160789e-08	143	230	701	62	24	905	663	87	582	337	382	401	32	107	76	37	Scaffold_249	1181315	1203059	DBCN	IPR000719 Protein kinase domain;IPR003533 Doublecortin domain;IPR036572 Doublecortin domain superfamily;IPR017441 Protein kinase, ATP binding site;IPR011009 Protein kinase-like domain superfamily	go_function:GO:0004672 protein kinase activity;go_process:GO:0006468 protein phosphorylation;go_function:GO:0005524 ATP binding;go_process:GO:0035556 intracellular signal transduction	CL2	NA	NA	March	March-UP g5914 DBCN	March-UP g5914
g56782	Adra	March	-5.55316583677521	-0.665440705822211	6.83836933996677e-10	8.91823435629324e-08	5	9	9	5	52	20	24	2	25	46	47	17	0	2	0	0	Scaffold_2425	681589	683844	NA	NA	-	NA	NA	NA	March	March-UP g56782	March-UP g56782
g56658	Adra	March	-8.18811321347489	-0.464230214082616	6.98562017618701e-10	9.01271404059903e-08	0	0	10	0	14	52	17	6	55	66	26	12	0	0	0	0	Scaffold_2423	1430296	1435054	NA	IPR036397 Ribonuclease H superfamily;IPR001584 Integrase, catalytic core;IPR041588 Integrase zinc-binding domain;IPR012337 Ribonuclease H-like superfamily	go_function:GO:0003676 nucleic acid binding;go_process:GO:0015074 DNA integration	NA	NA	NA	March	March-UP g56658	March-UP g56658
g17346	Adra	March	-3.22366218390284	3.58180652892156	1.26850442180272e-09	1.6149269388998e-07	128	164	44	180	557	43	702	131	1267	569	556	272	30	117	32	75	Scaffold_716	3365816	3371250	NA	IPR007053 LRAT domain	-	NA	NA	NA	March	March-UP g17346	March-UP g17346
g38223	Adra	March	-5.27227182462078	-0.476582863927213	1.45533135191205e-09	1.82027058214591e-07	0	5	37	15	45	55	30	21	32	31	29	54	0	2	1	0	Scaffold_1749	65609	72368	NA	NA	-	NA	NA	NA	March	March-UP g38223	March-UP g38223
g32141	Adra	March	-5.36851435569821	-0.40036628510211	1.75820035986287e-09	2.16117179866362e-07	5	0	0	20	23	0	18	20	48	33	67	19	0	3	0	0	Scaffold_1417	1456	3778	NA	NA	-	NA	NA	NA	March	March-UP g32141	March-UP g32141
g6841	Adra	March	-4.58375010113464	-0.0599261882494832	2.41850174821301e-09	2.84213820828461e-07	0	0	4	29	3	38	0	11	38	59	49	56	0	0	3	4	Scaffold_284	3208108	3211808	NA	NA	-	NA	NA	NA	March	March-UP g6841	March-UP g6841
g55176	Adra	March	-8.31744541643722	-0.339288272537357	2.68373484990892e-09	3.10268761999199e-07	0	0	0	2	0	0	43	0	49	20	101	13	0	0	0	0	Scaffold_2370	594263	603196	NA	IPR036691 Endonuclease/exonuclease/phosphatase superfamily	-	NA	NA	NA	March	March-UP g55176	March-UP g55176
g32649	Adra	March	-7.88482021635893	-0.730932849796192	2.71137587196956e-09	3.10873198247544e-07	16	24	0	53	10	14	24	26	60	15	41	14	0	0	0	0	Scaffold_1450	36188	56079	NA	IPR013106 Immunoglobulin V-set domain;IPR003599 Immunoglobulin subtype;IPR013783 Immunoglobulin-like fold;IPR007110 Immunoglobulin-like domain;IPR036179 Immunoglobulin-like domain superfamily	-	NA	NA	NA	March	March-UP g32649	March-UP g32649
g35151	Adra	March	-7.77882464572827	-0.841845633216793	3.1779611250714e-09	3.55865091848309e-07	7	0	24	2	0	0	0	0	34	12	24	42	0	0	0	0	Scaffold_1591	688648	689142	NA	IPR000515 ABC transporter type 1, transmembrane domain MetI-like	go_process:GO:0055085 transmembrane transport;go_component:GO:0016020 membrane	NA	NA	NA	March	March-UP g35151	March-UP g35151
g9661	Adra	March	-2.58041591766287	0.771123594092945	4.40509681687598e-09	4.88166894918878e-07	5	7	19	12	19	6	4	39	89	82	114	59	14	9	10	14	Scaffold_407	1894000	1895649	NA	NA	-	NA	NA	NA	March	March-UP g9661	March-UP g9661
g27487	Adra	March	-8.20072395333251	-0.473196420323246	6.54121691294126e-09	6.99517736669939e-07	0	0	0	0	0	0	2	0	48	14	22	63	0	0	0	0	Scaffold_1246	267	3335	NA	NA	-	NA	NA	NA	March	March-UP g27487	March-UP g27487
g59292	Adra	March	-5.1696336943685	0.696078516488981	7.97707227178243e-09	8.40461190881195e-07	6	4	14	12	113	132	17	236	113	41	95	107	4	4	0	0	Scaffold_2521	1516781	1537337	NA	IPR040676 Domain of unknown function DUF5641;IPR008042 Retrotransposon, Pao;IPR041588 Integrase zinc-binding domain;IPR036397 Ribonuclease H superfamily;IPR001584 Integrase, catalytic core;IPR012337 Ribonuclease H-like superfamily;IPR043502 DNA/RNA polymerase superfamily	go_function:GO:0003676 nucleic acid binding;go_process:GO:0015074 DNA integration	NA	NA	NA	March	March-UP g59292	March-UP g59292
g13261	Adra	March	-5.05387679558966	0.206534331371155	8.98677281644375e-09	9.3305386892281e-07	0	0	0	3	0	1	0	0	69	79	42	59	0	1	5	0	Scaffold_583	250704	251426	NA	NA	-	NA	NA	NA	March	March-UP g13261	March-UP g13261
g17637	Adra	March	-4.94608129090243	0.303242353069391	9.08712110118745e-09	9.34400702462486e-07	1	0	1	0	4	30	8	1	63	20	71	106	2	1	2	2	Scaffold_718	340	4191	NA	NA	-	NA	NA	NA	March	March-UP g17637	March-UP g17637
g53774	Adra	March	-8.22828714403871	-0.426249644746397	9.71803931198886e-09	9.94494855525444e-07	2	3	3	7	2	0	4	0	68	9	67	22	0	0	0	0	Scaffold_2330	1510769	1516735	NA	IPR041588 Integrase zinc-binding domain;IPR036397 Ribonuclease H superfamily;IPR008042 Retrotransposon, Pao;IPR000477 Reverse transcriptase domain;IPR040676 Domain of unknown function DUF5641;IPR005312 Protein of unknown function DUF1759;IPR043128 Reverse transcriptase/Diguanylate cyclase domain;IPR001584 Integrase, catalytic core;IPR012337 Ribonuclease H-like superfamily;IPR043502 DNA/RNA polyme…	go_function:GO:0003676 nucleic acid binding;go_process:GO:0015074 DNA integration	NA	NA	NA	March	March-UP g53774	March-UP g53774
g32853	Adra	March	-5.69948657636241	-0.0962542871598268	9.79825796058844e-09	9.97929244100312e-07	0	13	8	3	39	27	14	10	28	57	105	24	0	0	0	3	Scaffold_1469	403351	441210	SV2A	IPR036397 Ribonuclease H superfamily;IPR005828 Major facilitator, sugar transporter-like;IPR038717 Tc1-like transposase, DDE domain;IPR005829 Sugar transporter, conserved site;IPR020846 Major facilitator superfamily domain;IPR036259 MFS transporter superfamily	go_function:GO:0003676 nucleic acid binding;go_component:GO:0016021 integral component of membrane;go_function:GO:0022857 transmembrane transporter activity;go_process:GO:0055085 transmembrane transport	Synaptic vesicle glycoprotein 2A	NA	NA	March	March-UP g32853 SV2A	March-UP g32853
g54258	Adra	March	-5.67202742857799	-0.513568774832228	1.022785149889e-08	1.03379393595207e-06	0	0	0	0	2	0	0	0	49	19	61	23	0	0	2	0	Scaffold_2340	1399259	1399666	NA	NA	-	NA	NA	NA	March	March-UP g54258	March-UP g54258
g15261	Adra	March	-7.94473192014992	-0.679458455838637	1.02470691238937e-08	1.03379393595207e-06	2	11	6	19	1	0	0	0	62	10	45	18	0	0	0	0	Scaffold_644	2316666	2322632	NA	IPR000477 Reverse transcriptase domain;IPR043128 Reverse transcriptase/Diguanylate cyclase domain;IPR041588 Integrase zinc-binding domain;IPR005312 Protein of unknown function DUF1759;IPR036397 Ribonuclease H superfamily;IPR040676 Domain of unknown function DUF5641;IPR008042 Retrotransposon, Pao;IPR001584 Integrase, catalytic core;IPR043502 DNA/RNA polymerase superfamily;IPR012337 Ribonuclease H-…	go_function:GO:0003676 nucleic acid binding;go_process:GO:0015074 DNA integration	NA	NA	NA	March	March-UP g15261	March-UP g15261
g55658	Adra	March	-5.50861471277362	-0.707486332988679	1.07055365767351e-08	1.07497660236249e-06	0	21	58	22	0	9	0	0	16	35	59	21	0	2	0	0	Scaffold_2391	592349	597601	NA	NA	NA	NA	NA	NA	March	March-UP g55658	March-UP g55658
g27701	Adra	March	-2.71917417019551	3.34676196523339	1.28665897269272e-08	1.26815954414524e-06	553	1435	1771	2746	2193	974	271	1030	272	613	982	343	35	68	47	139	Scaffold_1269	136586	138531	NA	NA	-	NA	NA	NA	March	March-UP g27701	March-UP g27701
g55881	Adra	March	-2.04555660009078	3.42176029652632	1.29712321406161e-08	1.26886141218397e-06	61	134	174	206	102	117	224	195	409	514	701	467	71	68	159	126	Scaffold_2399	1557810	1562349	NA	IPR013783 Immunoglobulin-like fold;IPR013098 Immunoglobulin I-set;IPR043204 Basigin-like;IPR027114 Embigin;IPR036179 Immunoglobulin-like domain superfamily	go_function:GO:0005515 protein binding;go_process:GO:0007411 axon guidance;go_process:GO:0007155 cell adhesion;go_component:GO:0005886 plasma membrane	NA	NA	NA	March	March-UP g55881	March-UP g55881
g57544	Adra	March	-2.65561445215915	2.4066587167542	1.29923625055306e-08	1.26886141218397e-06	15	19	55	102	82	51	122	105	111	242	373	349	25	43	43	38	Scaffold_2452	1266894	1345564	afap1l1	IPR003128 Villin headpiece;IPR001849 Pleckstrin homology domain;IPR036886 Villin headpiece domain superfamily;IPR011993 PH-like domain superfamily;IPR032402 Putative adherens-junction anchoring domain;IPR030113 Actin-filament associated protein;IPR030112 Actin filament-associated protein 1-like 1	go_function:GO:0003779 actin binding;go_process:GO:0007010 cytoskeleton organization	AFAP1-like protein 1	NA	NA	March	March-UP g57544 afap1l1	March-UP g57544
g57544	Adra	March	-2.65561445215915	2.4066587167542	1.29923625055306e-08	1.26886141218397e-06	15	19	55	102	82	51	122	105	111	242	373	349	25	43	43	38	Scaffold_2452	1266894	1345564	ABLIM	IPR001781 Zinc finger, LIM-type;IPR028449 Actin-binding LIM protein 3	go_function:GO:0003779 actin binding;go_process:GO:0030036 actin cytoskeleton organization;go_process:GO:0006351 transcription, DNA-templated	Actin-binding LIM protein 2	NA	NA	March	March-UP g57544 ABLIM	March-UP g57544
g55691	Adra	March	-5.28344080333082	0.306418763341927	1.76753217483033e-08	1.68017680690094e-06	0	24	14	54	99	35	86	176	68	100	59	48	0	6	0	0	Scaffold_2391	939575	947411	NA	IPR024518 Domain of unknown function DUF3421	-	Natterin-3	NA	NA	March	March-UP g55691	March-UP g55691
g68167	Adra	March	-5.29765255011467	-0.477214007125599	1.84125714755434e-08	1.7425136226501e-06	0	33	10	8	21	171	40	31	55	19	37	39	0	3	0	0	Scaffold_2825	736774	778513	DNAH9	IPR035699 Dynein heavy chain, hydrolytic ATP-binding dynein motor region;IPR041466 Dynein heavy chain, AAA 5 extension domain;IPR043157 Dynein heavy chain, AAA1 domain, small subdomain;IPR024317 Dynein heavy chain, AAA module D4;IPR043160 Dynein heavy chain, C-terminal domain, barrel region;IPR024743 Dynein heavy chain, coiled coil stalk;IPR042219 Dynein heavy chain AAA lid domain superfamily;IPR…	go_function:GO:0005524 ATP binding;go_function:GO:0008569 ATP-dependent microtubule motor activity, minus-end-directed;go_process:GO:0007018 microtubule-based movement;go_component:GO:0030286 dynein complex	Axonemal beta dynein heavy chain 17	NA	NA	March	March-UP g68167 DNAH9	March-UP g68167
g5988	Adra	March	-4.52899661494447	-0.256186156115701	1.92277260946116e-08	1.81164143485266e-06	6	2	14	36	19	9	10	44	24	61	80	19	2	1	1	2	Scaffold_250	337841	338884	NA	IPR025246 Transposase IS30-like HTH domain;IPR038717 Tc1-like transposase, DDE domain;IPR036397 Ribonuclease H superfamily;IPR002492 Transposase, Tc1-like;IPR036388 Winged helix-like DNA-binding domain superfamily;IPR009057 Homeobox-like domain superfamily	go_function:GO:0003676 nucleic acid binding;go_function:GO:0003677 DNA binding;go_process:GO:0015074 DNA integration;go_process:GO:0006313 transposition, DNA-mediated	NA	NA	NA	March	March-UP g5988	March-UP g5988
g22569	Adra	March	-4.78853436264656	0.389402421304891	2.03639658073927e-08	1.91028289775665e-06	0	0	0	0	7	0	2	1	73	41	92	80	0	7	2	0	Scaffold_1000	7658	10083	NA	NA	-	NA	NA	NA	March	March-UP g22569	March-UP g22569
g48611	Adra	March	-5.91483478041804	-0.356937461060622	2.43906687253753e-08	2.22934881495011e-06	0	0	0	0	0	1	4	3	77	19	59	18	0	2	0	0	Scaffold_2129	209820	210554	NA	IPR004244 Transposase, L1	-	NA	NA	NA	March	March-UP g48611	March-UP g48611
g18481	Adra	March	-5.14373156972565	7.0288032116922	4.22037602413617e-08	3.67100989387639e-06	913	354	5182	3462	616	2731	736	145	20127	3221	5232	2810	316	65	198	74	Scaffold_750	381377	389998	hcea	IPR001506 Peptidase M12A;IPR000998 MAM domain;IPR006026 Peptidase, metallopeptidase;IPR008974 TRAF-like;IPR024079 Metallopeptidase, catalytic domain superfamily;IPR034035 Astacin-like metallopeptidase domain;IPR013320 Concanavalin A-like lectin/glucanase domain superfamily	go_process:GO:0006508 proteolysis;go_function:GO:0004222 metalloendopeptidase activity;go_component:GO:0016020 membrane;go_function:GO:0008270 zinc ion binding;go_function:GO:0008237 metallopeptidase activity;go_function:GO:0005515 protein binding	Choriolysin H 1	NA	NA	March	March-UP g18481 hcea	March-UP g18481
g54674	Adra	March	-4.24777720413493	1.18808501073315	5.23356059186758e-08	4.4595774477635e-06	11	29	13	24	111	126	66	116	132	180	154	56	6	14	0	3	Scaffold_2355	82608	90093	NA	NA	-	NA	NA	NA	March	March-UP g54674	March-UP g54674
g68604	Adra	March	-2.22094013466108	0.938851329551395	6.00224062424326e-08	4.99517208059591e-06	0	37	45	46	154	173	45	99	100	86	91	88	12	28	10	19	Scaffold_2838	1021056	1030781	NA	IPR038717 Tc1-like transposase, DDE domain;IPR029526 PiggyBac transposable element-derived protein;IPR036397 Ribonuclease H superfamily;IPR002492 Transposase, Tc1-like;IPR009057 Homeobox-like domain superfamily	go_function:GO:0003676 nucleic acid binding;go_function:GO:0003677 DNA binding;go_process:GO:0015074 DNA integration;go_process:GO:0006313 transposition, DNA-mediated	NA	NA	NA	March	March-UP g68604	March-UP g68604
g56467	Adra	March	-4.70535646046789	1.31563334950266	6.909801929159e-08	5.66809159988429e-06	0	0	0	22	0	106	58	111	177	163	127	99	0	9	0	11	Scaffold_2413	43599	45832	NA	NA	-	NA	NA	NA	March	March-UP g56467	March-UP g56467
g24919	Adra	March	-7.34884627064958	-1.18669754196742	6.91683143617823e-08	5.66809159988429e-06	1	0	0	0	0	6	3	0	8	36	35	11	0	0	0	0	Scaffold_1118	63931	64323	NA	NA	-	NA	NA	NA	March	March-UP g24919	March-UP g24919
g36942	Adra	March	-3.63375637871298	0.750726510211916	7.67438067037428e-08	6.21741112795322e-06	5	15	22	17	15	27	15	38	129	149	53	34	5	4	8	7	Scaffold_1674	264876	270241	NA	IPR000637 HMG-I/HMG-Y, DNA-binding, conserved site	go_process:GO:0006355 regulation of transcription, DNA-templated	NA	NA	NA	March	March-UP g36942	March-UP g36942
g9570	Adra	March	-6.10292916029528	0.896679883682392	8.29572567841312e-08	6.6702624364624e-06	0	0	3	5	13	8	6	9	12	254	86	75	1	2	0	2	Scaffold_401	681	1514	NA	NA	-	NA	NA	NA	March	March-UP g9570	March-UP g9570
g55031	Adra	March	-2.16443679001148	0.903905594302046	9.96604592185265e-08	7.88572612595496e-06	19	77	16	44	22	45	25	50	65	96	121	77	12	15	17	24	Scaffold_2367	1157502	1181027	NA	NA	NA	NA	NA	NA	March	March-UP g55031	March-UP g55031
g21429	Adra	March	-2.33244585131825	2.08218371999167	1.1911918753483e-07	9.33231202562252e-06	3	31	22	56	89	120	25	126	293	210	170	166	22	70	17	41	Scaffold_912	3692	14061	NA	IPR013783 Immunoglobulin-like fold;IPR036179 Immunoglobulin-like domain superfamily	-	NA	NA	NA	March	March-UP g21429	March-UP g21429
g52133	Adra	March	-9.16333829054948	0.416939063291958	1.21997265049822e-07	9.52291060177227e-06	4	2	14	5	6	15	215	19	134	9	24	118	0	0	0	0	Scaffold_2269	75195	81380	NA	IPR041577 Reverse transcriptase/retrotransposon-derived protein, RNase H-like domain;IPR036397 Ribonuclease H superfamily;IPR000477 Reverse transcriptase domain;IPR026523 Paraneoplastic antigen Ma;IPR001584 Integrase, catalytic core;IPR043128 Reverse transcriptase/Diguanylate cyclase domain;IPR041588 Integrase zinc-binding domain;IPR001969 Aspartic peptidase, active site;IPR043502 DNA/RNA polymer…	go_function:GO:0003676 nucleic acid binding;go_process:GO:0015074 DNA integration;go_process:GO:0006508 proteolysis;go_function:GO:0004190 aspartic-type endopeptidase activity	NA	NA	NA	March	March-UP g52133	March-UP g52133
g48232	Adra	March	-3.54231847696491	1.95877432647424	1.2768977633079e-07	9.85208169692818e-06	7	165	192	282	1001	95	124	40	329	181	340	48	21	8	11	19	Scaffold_2121	7327	10524	NA	IPR003961 Fibronectin type III;IPR040581 SNTX, thioredoxin-like domain;IPR013783 Immunoglobulin-like fold;IPR006703 AIG1-type guanine nucleotide-binding (G) domain;IPR027417 P-loop containing nucleoside triphosphate hydrolase;IPR036116 Fibronectin type III superfamily	go_function:GO:0005515 protein binding;go_function:GO:0005525 GTP binding	NA	NA	NA	March	March-UP g48232	March-UP g48232
g17013	Adra	March	-2.62840990389145	0.381645084203403	1.55763732443958e-07	1.18177648832885e-05	0	0	10	12	17	0	0	12	63	57	100	42	11	8	8	7	Scaffold_710	1264259	1284496	SATB1	IPR003350 CUT domain;IPR038216 SATB, CUTL domain superfamily;IPR010982 Lambda repressor-like, DNA-binding domain superfamily;IPR032392 SATB, ubiquitin-like oligomerisation domain;IPR032355 SATB, CUT1-like DNA-binding domain;IPR038224 SATB, ULD domain superfamily;IPR039673 DNA-binding protein SATB1/SATB2;IPR001356 Homeobox domain;IPR009057 Homeobox-like domain superfamily	go_function:GO:0003677 DNA binding;go_process:GO:0006338 chromatin remodeling	DNA-binding protein SATB1	NA	NA	March	March-UP g17013 SATB1	March-UP g17013
g72366	Adra	March	-3.60265519944125	0.723582419329592	1.55816799003523e-07	1.18177648832885e-05	3	15	23	18	19	25	10	37	132	143	49	33	5	4	8	7	Scaffold_2998	161172	173054	NA	IPR038717 Tc1-like transposase, DDE domain;IPR036397 Ribonuclease H superfamily	go_function:GO:0003676 nucleic acid binding	NA	NA	NA	March	March-UP g72366	March-UP g72366
g17306	Adra	March	-4.09482402285167	-0.649019106331693	1.61306769255699e-07	1.21909158333601e-05	1	2	2	2	21	1	5	27	49	41	29	12	1	2	2	1	Scaffold_716	2716555	2717961	NA	IPR025398 Domain of unknown function DUF4371;IPR012337 Ribonuclease H-like superfamily	-	NA	NA	NA	March	March-UP g17306	March-UP g17306
g46159	Adra	March	-2.55949335770413	2.83838434073429	1.80080039082401e-07	1.33845916079676e-05	64	145	207	931	288	145	95	91	282	499	455	256	21	64	25	118	Scaffold_2049	1161052	1161840	NA	IPR006461 PLAC8 motif-containing protein	-	NA	NA	NA	March	March-UP g46159	March-UP g46159
g42186	Adra	March	-4.5840754645448	1.23269727571042	1.87101716723848e-07	1.38468218591338e-05	0	0	0	0	5	12	2	8	99	61	265	118	0	14	4	2	Scaffold_1904	4504649	4508911	NA	NA	-	NA	NA	NA	March	March-UP g42186	March-UP g42186
g146	Adra	March	-3.99484942140035	6.31087425757517	2.79173669435252e-07	2.00368001405408e-05	8574	4625	5024	35722	3548	3381	1056	848	7604	4201	1813	4052	195	646	45	144	Scaffold_1	2796940	2805210	NA	IPR043159 D-galactoside/L-rhamnose binding SUEL lectin domain superfamily;IPR000922 D-galactoside/L-rhamnose binding SUEL lectin domain	go_function:GO:0030246 carbohydrate binding	L-rhamnose-binding lectin CSL2	NA	NA	March	March-UP g146	March-UP g146
g50043	Adra	March	-4.0602410095601	0.966306475706297	2.99931854673653e-07	2.12450941728447e-05	3	3	26	28	4	10	18	21	40	51	234	113	7	8	4	2	Scaffold_2193	323867	328132	NA	IPR001878 Zinc finger, CCHC-type;IPR001584 Integrase, catalytic core;IPR013103 Reverse transcriptase, RNA-dependent DNA polymerase;IPR036397 Ribonuclease H superfamily;IPR012337 Ribonuclease H-like superfamily;IPR036875 Zinc finger, CCHC-type superfamily	go_function:GO:0008270 zinc ion binding;go_function:GO:0003676 nucleic acid binding;go_process:GO:0015074 DNA integration	NA	NA	NA	March	March-UP g50043	March-UP g50043
g43806	Adra	March	-4.06646836245647	-0.673053446747077	3.21903640607342e-07	2.24995917166988e-05	1	2	1	2	19	1	7	21	49	42	25	12	1	2	2	1	Scaffold_1948	65966	67372	NA	IPR025398 Domain of unknown function DUF4371;IPR012337 Ribonuclease H-like superfamily	-	NA	NA	NA	March	March-UP g43806	March-UP g43806
g58769	Adra	March	-4.06646836245647	-0.673053446747077	3.21903640607342e-07	2.24995917166988e-05	1	2	1	2	19	1	7	21	49	42	25	12	1	2	2	1	Scaffold_2505	1607479	1608885	NA	IPR025398 Domain of unknown function DUF4371;IPR012337 Ribonuclease H-like superfamily	-	NA	NA	NA	March	March-UP g58769	March-UP g58769
g46514	Adra	March	-5.29552370270103	0.650482993524184	3.2627073696863e-07	2.26567484489775e-05	8	39	62	12	20	5	0	4	78	90	73	103	0	8	0	0	Scaffold_2061	398430	400481	NA	IPR003879 Butyrophylin-like, SPRY domain;IPR000315 B-box-type zinc finger;IPR001841 Zinc finger, RING-type;IPR006574 SPRY-associated;IPR013083 Zinc finger, RING/FYVE/PHD-type;IPR043136 B30.2/SPRY domain superfamily;IPR017907 Zinc finger, RING-type, conserved site;IPR001870 B30.2/SPRY domain;IPR013320 Concanavalin A-like lectin/glucanase domain superfamily	go_function:GO:0008270 zinc ion binding	NA	NA	NA	March	March-UP g46514	March-UP g46514
g17110	Adra	March	-4.26960643854069	0.778462516009742	3.8835090218449e-07	2.64523856558021e-05	9	6	10	13	15	9	0	35	102	86	124	71	0	8	0	10	Scaffold_710	3856593	3901190	1	IPR002181 Fibrinogen, alpha/beta/gamma chain, C-terminal globular domain;IPR014716 Fibrinogen, alpha/beta/gamma chain, C-terminal globular, subdomain 1;IPR036056 Fibrinogen-like, C-terminal	-	-1	NA	NA	March	March-UP g17110 ANG1	March-UP g17110
g57877	Adra	March	-2.17060664892801	0.470748883058838	3.89966006691741e-07	2.64780728607078e-05	13	4	40	13	21	36	11	49	62	69	82	50	10	20	7	13	Scaffold_2462	658639	664312	NPAL2	IPR008521 Magnesium transporter NIPA	go_component:GO:0016021 integral component of membrane;go_process:GO:0015693 magnesium ion transport;go_function:GO:0015095 magnesium ion transmembrane transporter activity	NIPA-like protein 2	NA	NA	March	March-UP g57877 NPAL2	March-UP g57877
g40972	Adra	March	-10.8933249473776	2.09815661526254	3.9632315262148e-07	2.68245556590766e-05	0	0	0	0	34	26	16	104	925	58	29	24	0	0	0	0	Scaffold_1871	40373	40812	NA	IPR013106 Immunoglobulin V-set domain;IPR013783 Immunoglobulin-like fold;IPR007110 Immunoglobulin-like domain;IPR036179 Immunoglobulin-like domain superfamily	-	NA	NA	NA	March	March-UP g40972	March-UP g40972
g10542	Adra	March	-4.82514309712825	2.85154578918566	4.15747744211464e-07	2.79623042553295e-05	27	0	58	40	0	0	309	0	529	321	365	429	0	3	22	27	Scaffold_459	7264	18950	pol	IPR041373 Reverse transcriptase, RNase H-like domain;IPR041577 Reverse transcriptase/retrotransposon-derived protein, RNase H-like domain;IPR043128 Reverse transcriptase/Diguanylate cyclase domain;IPR000477 Reverse transcriptase domain;IPR036397 Ribonuclease H superfamily;IPR001584 Integrase, catalytic core;IPR041588 Integrase zinc-binding domain;IPR043502 DNA/RNA polymerase superfamily;IPR012337…	go_function:GO:0003676 nucleic acid binding;go_process:GO:0015074 DNA integration	Endonuclease	NA	NA	March	March-UP g10542 pol	March-UP g10542
g46816	Adra	March	-2.71910840785692	2.22927316074306	4.47093755958669e-07	2.99763048665957e-05	60	162	160	60	98	124	11	73	301	256	342	108	12	24	61	28	Scaffold_2068	187690	206499	NA	IPR003599 Immunoglobulin subtype;IPR013106 Immunoglobulin V-set domain;IPR003598 Immunoglobulin subtype 2;IPR013783 Immunoglobulin-like fold;IPR007110 Immunoglobulin-like domain;IPR036179 Immunoglobulin-like domain superfamily	-	NA	NA	NA	March	March-UP g46816	March-UP g46816
g5506	Adra	March	-5.03324696092612	-0.55086517751129	6.49261295584783e-07	4.2466056850053e-05	9	109	198	0	4	3	66	15	22	42	64	19	3	0	0	0	Scaffold_235	1231955	1232632	hba	IPR002338 Haemoglobin, alpha-type;IPR012292 Globin/Protoglobin;IPR000971 Globin;IPR009050 Globin-like superfamily	go_component:GO:0005833 hemoglobin complex;go_process:GO:0015671 oxygen transport;go_function:GO:0020037 heme binding;go_function:GO:0019825 oxygen binding	Hemoglobin subunit alpha	NA	NA	March	March-UP g5506 hba	March-UP g5506
g61220	Adra	March	-4.93920966076663	-0.767414112805099	6.78601592905089e-07	4.4115291395301e-05	1	0	1	5	0	6	2	5	23	9	36	48	0	1	1	1	Scaffold_2572	1734262	1737735	NA	NA	-	NA	NA	NA	March	March-UP g61220	March-UP g61220
g38434	Adra	March	-7.83127874694465	-0.793025596396051	7.54240656358125e-07	4.82985004736155e-05	0	1	3	1	0	0	7	0	4	56	23	35	0	0	0	0	Scaffold_1751	4758123	4758536	NA	NA	NA	NA	NA	NA	March	March-UP g38434	March-UP g38434
g66943	Adra	March	-2.2458584446561	1.28133224352683	8.98399011674596e-07	5.63488506208102e-05	11	16	11	51	43	26	29	95	129	124	135	88	20	41	11	14	Scaffold_2784	116968	117711	NA	NA	-	NA	NA	NA	March	March-UP g66943	March-UP g66943
g47247	Adra	March	-2.75700902009691	1.62947940512285	1.00629050651503e-06	6.22038767437674e-05	214	263	520	208	204	187	132	284	148	211	178	108	31	20	5	21	Scaffold_2077	1161299	1161793	NA	NA	NA	NA	NA	NA	March	March-UP g47247	March-UP g47247
g9327	Adra	March	-5.64935499801754	-0.0913649215206501	1.01221283017244e-06	6.23896484487845e-05	0	0	0	0	1	0	8	0	57	12	26	95	1	0	1	1	Scaffold_390	2736	3293	NA	NA	-	NA	NA	NA	March	March-UP g9327	March-UP g9327
g46533	Adra	March	-2.81948862540266	1.45283281899882	1.18165038618663e-06	7.06168768862747e-05	2	1	80	7	28	17	76	12	145	51	294	98	17	22	16	12	Scaffold_2061	753628	754464	NA	NA	-	NA	NA	NA	March	March-UP g46533	March-UP g46533
g9542	Adra	March	-2.24650681175135	4.87346658285367	1.22210292199234e-06	7.24053664697291e-05	81	167	204	632	670	147	269	505	655	960	1552	2391	230	247	249	321	Scaffold_398	3108354	3125129	Tem5	IPR000483 Cysteine-rich flanking region, C-terminal;IPR003599 Immunoglobulin subtype;IPR003591 Leucine-rich repeat, typical subtype;IPR032675 Leucine-rich repeat domain superfamily;IPR013783 Immunoglobulin-like fold;IPR000203 GPS motif;IPR001611 Leucine-rich repeat;IPR036445 GPCR family 2, extracellular hormone receptor domain superfamily;IPR007110 Immunoglobulin-like domain;IPR001879 GPCR, famil…	go_function:GO:0005515 protein binding;go_function:GO:0004930 G protein-coupled receptor activity;go_component:GO:0016020 membrane	Adhesion G protein-coupled receptor A2	NA	NA	March	March-UP g9542 Tem5	March-UP g9542
g30296	Adra	March	-4.90758780953629	-0.388912568436272	1.31676021381545e-06	7.63221340192001e-05	1	0	0	0	17	20	7	18	28	47	72	20	0	0	4	0	Scaffold_1357	288333	302053	NA	IPR043128 Reverse transcriptase/Diguanylate cyclase domain;IPR036397 Ribonuclease H superfamily;IPR008042 Retrotransposon, Pao;IPR001584 Integrase, catalytic core;IPR043502 DNA/RNA polymerase superfamily;IPR012337 Ribonuclease H-like superfamily	go_function:GO:0003676 nucleic acid binding;go_process:GO:0015074 DNA integration	NA	NA	NA	March	March-UP g30296	March-UP g30296
g72566	Adra	March	-2.15416165305413	2.11313973069936	1.35074409740287e-06	7.8080310149331e-05	48	120	152	85	93	41	46	92	217	332	126	160	29	63	43	28	Scaffold_3002	1289031	1298178	NA	IPR001368 TNFR/NGFR cysteine-rich region	go_function:GO:0005515 protein binding	NA	NA	NA	March	March-UP g72566	March-UP g72566
g53572	Adra	March	-2.41625784668996	0.875834459989213	1.48839733787847e-06	8.55748447917866e-05	7	9	28	28	110	77	65	259	54	67	177	72	13	15	12	17	Scaffold_2327	140607	141380	NA	NA	NA	NA	NA	NA	March	March-UP g53572	March-UP g53572
g12932	Adra	March	-3.93160399970963	0.410337172216271	1.57870088963729e-06	8.95630096221816e-05	1	0	3	1	14	15	42	1	64	23	147	59	6	6	2	1	Scaffold_568	554011	554316	NA	NA	-	NA	NA	NA	March	March-UP g12932	March-UP g12932
g67511	Adra	March	-2.34793401230148	4.78614347590106	1.74129584516858e-06	9.72397794685784e-05	348	1872	2311	1528	1398	857	345	862	884	1623	2520	794	86	544	155	230	Scaffold_2806	11329	20226	NA	IPR006073 GTP binding domain;IPR027417 P-loop containing nucleoside triphosphate hydrolase	go_function:GO:0005525 GTP binding	NA	NA	NA	March	March-UP g67511	March-UP g67511
g57663	Adra	March	-2.72430416125164	4.03569886568477	1.79269035478767e-06	9.86879034463152e-05	148	234	650	252	169	372	195	259	1627	553	895	439	51	50	136	217	Scaffold_2455	661735	664688	NA	NA	NA	NA	NA	NA	March	March-UP g57663	March-UP g57663
g69313	Adra	March	-3.58711096827456	0.00400499708268461	1.88076816492588e-06	0.000103143255157525	0	0	0	12	6	5	0	1	74	30	87	24	2	1	7	4	Scaffold_2865	178144	189312	NA	NA	-	NA	NA	NA	March	March-UP g69313	March-UP g69313
g72549	Adra	March	-2.31732445387687	3.44348899721714	1.99686271915668e-06	0.000107850757164957	109	284	553	128	303	117	94	804	1043	204	643	334	76	88	111	94	Scaffold_3002	983493	999754	NA	IPR003597 Immunoglobulin C1-set;IPR013783 Immunoglobulin-like fold;IPR007110 Immunoglobulin-like domain;IPR036179 Immunoglobulin-like domain superfamily	-	NA	NA	NA	March	March-UP g72549	March-UP g72549
g6008	Adra	March	-4.43659446301972	-0.330874468083208	2.22708393336882e-06	0.000118785214880031	3	0	0	0	21	20	9	18	28	45	75	24	0	1	5	0	Scaffold_250	790046	793642	NA	IPR040676 Domain of unknown function DUF5641;IPR043128 Reverse transcriptase/Diguanylate cyclase domain;IPR008042 Retrotransposon, Pao;IPR036397 Ribonuclease H superfamily;IPR001584 Integrase, catalytic core;IPR043502 DNA/RNA polymerase superfamily;IPR012337 Ribonuclease H-like superfamily	go_function:GO:0003676 nucleic acid binding;go_process:GO:0015074 DNA integration	NA	NA	NA	March	March-UP g6008	March-UP g6008
g72896	Adra	March	-2.42084700944793	3.65908380936764	2.2536528464574e-06	0.000119903301194107	91	266	642	170	932	2881	1011	628	655	707	626	568	32	219	39	161	Scaffold_3023	247774	251763	nrdB	IPR012348 Ribonucleotide reductase-like;IPR000358 Ribonucleotide reductase small subunit family;IPR030475 Ribonucleotide reductase small subunit, acitve site;IPR033909 Ribonucleotide reductase small subunit;IPR009078 Ferritin-like superfamily	go_function:GO:0016491 oxidoreductase activity;go_process:GO:0009263 deoxyribonucleotide biosynthetic process	Ribonucleotide reductase small subunit	NA	NA	March	March-UP g72896 nrdB	March-UP g72896
g39187	Adra	March	-2.63166750259494	-0.154437316034785	2.46679092220144e-06	0.000129950059714395	8	110	81	118	100	61	16	52	29	38	68	39	3	6	4	11	Scaffold_1790	268396	272109	NA	IPR009079 Four-helical cytokine-like, core	-	NA	NA	NA	March	March-UP g39187	March-UP g39187
g14670	Adra	March	-2.44349793160427	2.09907694338907	2.54343484157656e-06	0.000133330844097156	24	156	2500	78	3989	465	47	163	143	372	226	134	18	18	45	55	Scaffold_629	791778	799153	AMBP	IPR002223 Pancreatic trypsin inhibitor Kunitz domain;IPR002968 Alpha-1-microglobulin;IPR012674 Calycin;IPR036880 Pancreatic trypsin inhibitor Kunitz domain superfamily;IPR000566 Lipocalin/cytosolic fatty-acid binding domain;IPR029856 Protein AMBP;IPR020901 Proteinase inhibitor I2, Kunitz, conserved site	go_function:GO:0004867 serine-type endopeptidase inhibitor activity	Alpha-1-microglobulin	NA	NA	March	March-UP g14670 AMBP	March-UP g14670
g41822	Adra	March	-3.84420776391344	1.52624416888079	2.59283796404525e-06	0.000135027037959634	12	87	2606	34	10097	319	29	63	82	314	102	131	0	14	12	14	Scaffold_1895	308098	322364	bhmt	IPR003726 Homocysteine-binding domain;IPR036589 Homocysteine-binding domain superfamily	-	Betaine--homocysteine S-methyltransferase 1	NA	NA	March	March-UP g41822 bhmt	March-UP g41822
g44181	Adra	March	-2.24838033668844	0.387215630508858	2.6717343375083e-06	0.000137694106049705	4	5	16	18	2	5	3	8	66	77	55	49	6	20	6	14	Scaffold_1967	42967	44859	NA	IPR000477 Reverse transcriptase domain;IPR015095 Alkylated DNA repair protein AlkB, homologue 8, N-terminal;IPR043502 DNA/RNA polymerase superfamily	go_function:GO:0016706 2-oxoglutarate-dependent dioxygenase activity;go_function:GO:0008168 methyltransferase activity	NA	NA	NA	March	March-UP g44181	March-UP g44181
g17970	Adra	March	-4.72340851344674	1.49308181241333	3.27586050849607e-06	0.000164084553994646	13	134	43	106	95	47	38	66	107	237	210	100	0	17	0	6	Scaffold_727	3817317	3819220	NA	IPR000098 Interleukin-10;IPR020443 Interleukin-10/19/20/22/24/26 family;IPR009079 Four-helical cytokine-like, core	go_function:GO:0005125 cytokine activity;go_component:GO:0005576 extracellular region;go_process:GO:0006955 immune response	NA	NA	NA	March	March-UP g17970	March-UP g17970
g51423	Adra	March	-2.45056771633187	0.986322725881721	3.42505269259657e-06	0.000170360527881989	33	52	18	42	29	38	55	90	90	117	118	70	20	23	10	6	Scaffold_2243	81921	82307	gH2A	IPR002119 Histone H2A;IPR032454 Histone H2A, C-terminal domain;IPR009072 Histone-fold;IPR007125 Histone H2A/H2B/H3;IPR032458 Histone H2A conserved site	go_function:GO:0003677 DNA binding;go_component:GO:0000786 nucleosome;go_function:GO:0046982 protein heterodimerization activity	Histone H2A	NA	NA	March	March-UP g51423 gH2A	March-UP g51423
g43937	Adra	March	-3.37294025982811	2.5581311615961	3.60896180098452e-06	0.000178677025461706	3	2	4	120	124	90	3	16	411	123	697	135	16	11	17	65	Scaffold_1956	847762	862896	KCNJ13	IPR016449 Potassium channel, inwardly rectifying, Kir;IPR041647 Inward rectifier potassium channel, C-terminal;IPR013518 Potassium channel, inwardly rectifying, Kir, cytoplasmic;IPR014756 Immunoglobulin E-set	go_component:GO:0016021 integral component of membrane;go_function:GO:0005242 inward rectifier potassium channel activity;go_process:GO:0006813 potassium ion transport	Inward rectifier K(+) channel Kir7.1	NA	NA	March	March-UP g43937 KCNJ13	March-UP g43937
g32238	Adra	March	-2.36105699373859	6.20874505107089	4.11684704392414e-06	0.000200116192216931	95	230	414	544	793	809	393	1738	3598	2909	6759	2331	344	407	330	1544	Scaffold_1422	287822	290475	mynn	IPR000210 BTB/POZ domain;IPR013087 Zinc finger C2H2-type;IPR011333 SKP1/BTB/POZ domain superfamily;IPR036236 Zinc finger C2H2 superfamily	go_function:GO:0005515 protein binding	Only zinc finger protein	NA	NA	March	March-UP g32238 mynn	March-UP g32238
g7070	Adra	March	-8.12228509928071	-0.546970117535525	4.14448154946365e-06	0.000200547899049612	4	0	4	3	0	10	97	14	65	5	10	58	0	0	0	0	Scaffold_304	1945997	1952556	NA	IPR001584 Integrase, catalytic core;IPR043128 Reverse transcriptase/Diguanylate cyclase domain;IPR041577 Reverse transcriptase/retrotransposon-derived protein, RNase H-like domain;IPR026523 Paraneoplastic antigen Ma;IPR036397 Ribonuclease H superfamily;IPR041588 Integrase zinc-binding domain;IPR000477 Reverse transcriptase domain;IPR001969 Aspartic peptidase, active site;IPR012337 Ribonuclease H-…	go_process:GO:0015074 DNA integration;go_function:GO:0003676 nucleic acid binding;go_process:GO:0006508 proteolysis;go_function:GO:0004190 aspartic-type endopeptidase activity	NA	NA	NA	March	March-UP g7070	March-UP g7070
g70344	Adra	March	-2.06872231598937	2.34798743074031	4.29264452988205e-06	0.00020678171442594	22	178	849	82	4239	138	47	146	230	350	194	202	50	82	43	23	Scaffold_2914	92398	109273	F10	IPR000294 Gamma-carboxyglutamic acid-rich (GLA) domain;IPR001314 Peptidase S1A, chymotrypsin family;IPR001254 Serine proteases, trypsin domain;IPR043504 Peptidase S1, PA clan, chymotrypsin-like fold;IPR017857 Coagulation factor-like, Gla domain superfamily;IPR033190 Coagulation factor VII;IPR033116 Serine proteases, trypsin family, serine active site;IPR018114 Serine proteases, trypsin family, hi…	go_function:GO:0005509 calcium ion binding;go_component:GO:0005576 extracellular region;go_process:GO:0006508 proteolysis;go_function:GO:0004252 serine-type endopeptidase activity;go_process:GO:0007596 blood coagulation	Venom coagulation factor Xa-like protease	NA	NA	March	March-UP g70344 F10	March-UP g70344
g9767	Adra	March	-2.5590785692276	1.32995587560587	4.40499515407556e-06	0.000211716935630041	0	53	59	40	156	62	34	72	79	204	159	75	14	36	6	20	Scaffold_411	113368	115863	NA	IPR013106 Immunoglobulin V-set domain;IPR003599 Immunoglobulin subtype;IPR013783 Immunoglobulin-like fold;IPR007110 Immunoglobulin-like domain;IPR036179 Immunoglobulin-like domain superfamily	-	NA	NA	NA	March	March-UP g9767	March-UP g9767
g48788	Adra	March	-3.40554196197245	1.59159375708396	5.05174964371674e-06	0.000240104047510697	77	623	719	1993	1978	75	49	29	67	120	422	86	5	33	7	11	Scaffold_2134	442767	457307	des	IPR039008 Intermediate filament, rod domain;IPR018039 Intermediate filament protein, conserved site	-	Desmin	NA	NA	March	March-UP g48788 des	March-UP g48788
g37010	Adra	March	-3.86938470633674	2.54534603726239	5.82620023724345e-06	0.000272075918502539	11	1	6	8	28	3	38	61	856	241	203	48	11	44	13	12	Scaffold_1677	369093	374408	NA	IPR041588 Integrase zinc-binding domain;IPR041373 Reverse transcriptase, RNase H-like domain;IPR000477 Reverse transcriptase domain;IPR036397 Ribonuclease H superfamily;IPR043128 Reverse transcriptase/Diguanylate cyclase domain;IPR001584 Integrase, catalytic core;IPR001878 Zinc finger, CCHC-type;IPR043502 DNA/RNA polymerase superfamily;IPR012337 Ribonuclease H-like superfamily	go_function:GO:0003676 nucleic acid binding;go_process:GO:0015074 DNA integration;go_function:GO:0008270 zinc ion binding	NA	NA	NA	March	March-UP g37010	March-UP g37010
g54678	Adra	March	-2.43853277299307	1.49991883411312	5.99343100408444e-06	0.000278668483294256	39	273	254	226	143	115	53	95	52	153	228	136	21	22	28	15	Scaffold_2355	102920	136960	NA	NA	-	NA	NA	NA	March	March-UP g54678	March-UP g54678
g40551	Adra	March	-2.00765889323536	1.89141898730473	6.11338686387734e-06	0.000283015407455863	44	70	126	203	95	44	72	162	153	199	229	134	47	56	18	26	Scaffold_1858	114874	126335	GJA3	IPR000500 Connexin;IPR019570 Gap junction protein, cysteine-rich domain;IPR013092 Connexin, N-terminal;IPR038359 Connexin, N-terminal domain superfamily;IPR017990 Connexin, conserved site	go_component:GO:0005922 connexin complex;go_process:GO:0007154 cell communication	Connexin-36	NA	NA	March	March-UP g40551 GJA3	March-UP g40551
g54202	Adra	March	-7.33112449720872	-1.22904567395362	6.74249318995387e-06	0.000309460181001574	3	0	0	0	0	2	65	16	38	4	9	30	0	0	0	0	Scaffold_2340	411527	416577	NA	IPR036397 Ribonuclease H superfamily;IPR041577 Reverse transcriptase/retrotransposon-derived protein, RNase H-like domain;IPR041588 Integrase zinc-binding domain;IPR001584 Integrase, catalytic core;IPR012337 Ribonuclease H-like superfamily;IPR043502 DNA/RNA polymerase superfamily	go_function:GO:0003676 nucleic acid binding;go_process:GO:0015074 DNA integration	NA	NA	NA	March	March-UP g54202	March-UP g54202
g32602	Adra	March	-4.49891176490861	-0.26427150862263	7.74331894251641e-06	0.000351622304761233	0	0	0	4	0	10	23	0	63	43	14	49	3	0	0	3	Scaffold_1441	519447	589435	SORCS	IPR006581 VPS10;IPR031777 Sortilin, C-terminal;IPR015943 WD40/YVTN repeat-like-containing domain superfamily;IPR031778 Sortilin, N-terminal;IPR015095 Alkylated DNA repair protein AlkB, homologue 8, N-terminal	go_component:GO:0016021 integral component of membrane;go_function:GO:0005515 protein binding;go_function:GO:0016706 2-oxoglutarate-dependent dioxygenase activity;go_function:GO:0008168 methyltransferase activity	SorCS2 104 kDa chain	NA	NA	March	March-UP g32602 SORCS	March-UP g32602
g72537	Adra	March	-4.14879750389169	-0.0350964504168438	8.09229265004521e-06	0.000363609149578082	0	7	6	6	64	33	32	403	72	38	85	20	0	7	3	0	Scaffold_3002	909391	909881	Gm5153	IPR013106 Immunoglobulin V-set domain;IPR003599 Immunoglobulin subtype;IPR013783 Immunoglobulin-like fold;IPR007110 Immunoglobulin-like domain;IPR036179 Immunoglobulin-like domain superfamily	-	Anti-arsonate antibodies	NA	NA	March	March-UP g72537 Gm5153	March-UP g72537
g32915	Adra	March	-2.31376518446238	2.37438364945316	9.24555136619116e-06	0.000405458338491683	25	49	79	57	56	84	45	132	456	112	174	265	43	58	40	34	Scaffold_1472	53055	56652	Grc	IPR008347 Transient receptor potential channel, vanilloid 1-4;IPR002110 Ankyrin repeat;IPR020683 Ankyrin repeat-containing domain;IPR036770 Ankyrin repeat-containing domain superfamily;IPR024865 Transient receptor potential channel, vanilloid 2;IPR024862 Transient receptor potential cation channel subfamily V	go_component:GO:0016021 integral component of membrane;go_process:GO:0006811 ion transport;go_function:GO:0005216 ion channel activity;go_function:GO:0005515 protein binding;go_process:GO:0009408 response to heat;go_component:GO:0005886 plasma membrane;go_process:GO:0070588 calcium ion transmembrane transport	OTRPC1	OTRPC1	cell volume homeostasis; response to osmotic stress; hypotonic response; hyperosmotic salinity response; multicellular organismal water homeostasis; cellular response to osmotic stress; cellular hypotonic response; cellular hypotonic salinity response	March	March-UP g32915 Grc	March-UP g32915 OTRPC1
g19485	Adra	March	-2.38595198911952	-0.34312967671137	1.00404808146687e-05	0.000436475210699461	10	0	24	0	2	3	4	20	44	45	36	22	2	9	7	6	Scaffold_804	2988909	3005368	Crlf1	IPR003961 Fibronectin type III;IPR013783 Immunoglobulin-like fold;IPR010457 Immunoglobulin C2-set-like, ligand-binding;IPR015152 Growth hormone/erythropoietin receptor, ligand binding;IPR036179 Immunoglobulin-like domain superfamily;IPR036116 Fibronectin type III superfamily	go_function:GO:0005515 protein binding	Cytokine receptor-like factor 1	NA	NA	March	March-UP g19485 Crlf1	March-UP g19485
g10750	Adra	March	-2.85888410503936	2.98962643988933	1.00737151407541e-05	0.000437031682414702	12	14	48	9	208	466	478	1306	236	410	769	314	83	50	34	13	Scaffold_461	247942	265070	NA	NA	-	NA	NA	NA	March	March-UP g10750	March-UP g10750
g51266	Adra	March	-7.73408521449911	0.740384943280792	1.07618326227112e-05	0.000463126913751604	24	0	24	16	126	71	65	12	212	151	5	19	1	0	0	0	Scaffold_2240	5549	11461	NA	IPR043128 Reverse transcriptase/Diguanylate cyclase domain;IPR040676 Domain of unknown function DUF5641;IPR008042 Retrotransposon, Pao;IPR005312 Protein of unknown function DUF1759;IPR000477 Reverse transcriptase domain;IPR036397 Ribonuclease H superfamily;IPR041588 Integrase zinc-binding domain;IPR001584 Integrase, catalytic core;IPR012337 Ribonuclease H-like superfamily;IPR043502 DNA/RNA polyme…	go_function:GO:0003676 nucleic acid binding;go_process:GO:0015074 DNA integration	NA	NA	NA	March	March-UP g51266	March-UP g51266
g68936	Adra	March	-2.26183340772269	2.54271475111785	1.13410512837297e-05	0.000485124809712823	11	99	126	108	53	64	45	127	341	246	267	286	14	108	26	77	Scaffold_2845	4573	10250	gloA	IPR004360 Glyoxalase/fosfomycin resistance/dioxygenase domain;IPR004361 Glyoxalase I;IPR029068 Glyoxalase/Bleomycin resistance protein/Dihydroxybiphenyl dioxygenase;IPR018146 Glyoxalase I, conserved site;IPR037523 Vicinal oxygen chelate (VOC) domain	go_function:GO:0046872 metal ion binding;go_function:GO:0004462 lactoylglutathione lyase activity	Lactoylglutathione lyase	Lactoylglutathione lyase	response to salt stress	March	March-UP g68936 gloA	March-UP g68936 Lactoylglutathione lyase
g14557	Adra	March	-3.9677966324816	2.95011200758089	1.15523165453375e-05	0.000490239972761266	18	203	132	341	47	92	110	187	266	591	584	330	16	0	29	49	Scaffold_628	2370563	2382610	GZMA	IPR001314 Peptidase S1A, chymotrypsin family;IPR001254 Serine proteases, trypsin domain;IPR043504 Peptidase S1, PA clan, chymotrypsin-like fold;IPR018114 Serine proteases, trypsin family, histidine active site;IPR009003 Peptidase S1, PA clan	go_process:GO:0006508 proteolysis;go_function:GO:0004252 serine-type endopeptidase activity	CCP1	NA	NA	March	March-UP g14557 GZMA	March-UP g14557
g8905	Adra	March	-10.0606611726581	1.28242202798769	1.28303894116803e-05	0.00053596947018949	0	0	0	0	0	0	0	0	201	231	0	120	0	0	0	0	Scaffold_364	2689779	2696595	xlrs1	IPR000421 Coagulation factor 5/8 C-terminal domain;IPR008979 Galactose-binding-like domain superfamily	-	Retinoschisin	NA	NA	March	March-UP g8905 xlrs1	March-UP g8905
g28187	Adra	March	-3.92605120841207	-0.803105073748731	1.36768950423982e-05	0.000565805476144704	0	0	9	2	23	25	30	42	36	18	53	11	0	3	3	0	Scaffold_1282	424783	430532	NA	NA	-	NA	NA	NA	March	March-UP g28187	March-UP g28187
g53702	Adra	March	-3.65026145839547	1.08824754941973	1.4123339717702e-05	0.000582023101892505	0	0	10	17	0	0	0	19	74	143	80	146	12	0	5	12	Scaffold_2329	1296243	1323077	rara	IPR003078 Retinoic acid receptor;IPR001723 Nuclear hormone receptor;IPR026523 Paraneoplastic antigen Ma;IPR000477 Reverse transcriptase domain;IPR036397 Ribonuclease H superfamily;IPR041577 Reverse transcriptase/retrotransposon-derived protein, RNase H-like domain;IPR043128 Reverse transcriptase/Diguanylate cyclase domain;IPR035500 Nuclear hormone receptor-like domain superfamily;IPR001584 Integr…	go_process:GO:0048384 retinoic acid receptor signaling pathway;go_function:GO:0003677 DNA binding;go_process:GO:0006355 regulation of transcription, DNA-templated;go_component:GO:0005634 nucleus;go_function:GO:0004879 nuclear receptor activity;go_function:GO:0003676 nucleic acid binding;go_process:GO:0015074 DNA integration	Retinoic acid receptor alpha	NA	NA	March	March-UP g53702 rara	March-UP g53702
g24109	Adra	March	-3.25331928906532	-0.233736810842735	1.54958962541721e-05	0.000636134796706782	0	0	2	0	2	14	2	0	45	13	40	65	3	3	3	6	Scaffold_1081	366015	370146	NA	NA	-	NA	NA	NA	March	March-UP g24109	March-UP g24109
g66345	Adra	March	-6.33069312958001	2.6692086245072	1.68942643888757e-05	0.00068694776948531	6	32	33	22	143	79	67	40	152	375	554	419	0	18	0	0	Scaffold_2763	31948	42143	NA	IPR001611 Leucine-rich repeat;IPR032675 Leucine-rich repeat domain superfamily	go_function:GO:0005515 protein binding	NA	NA	NA	March	March-UP g66345	March-UP g66345
g16274	Adra	March	-2.33322048757329	-0.124872928256899	1.71337501667392e-05	0.000695363659518441	1	3	4	10	2	4	3	7	44	38	41	45	6	14	5	4	Scaffold_689	2680910	2683925	NA	IPR015095 Alkylated DNA repair protein AlkB, homologue 8, N-terminal;IPR036691 Endonuclease/exonuclease/phosphatase superfamily;IPR000477 Reverse transcriptase domain;IPR043502 DNA/RNA polymerase superfamily	go_function:GO:0016706 2-oxoglutarate-dependent dioxygenase activity;go_function:GO:0008168 methyltransferase activity	NA	NA	NA	March	March-UP g16274	March-UP g16274
g53402	Adra	March	-3.32332690564947	1.12592946054568	1.98834900026119e-05	0.000786077789604183	24	8	6	2	5	72	9	77	102	165	41	137	3	3	15	19	Scaffold_2322	24627	25808	NA	NA	-	NA	NA	NA	March	March-UP g53402	March-UP g53402
g18801	Adra	March	-7.31906857207588	0.348767085512604	2.20972081299708e-05	0.000860138010606488	16	0	11	11	81	62	40	8	161	110	5	14	1	0	0	0	Scaffold_774	248696	254608	NA	IPR043128 Reverse transcriptase/Diguanylate cyclase domain;IPR040676 Domain of unknown function DUF5641;IPR008042 Retrotransposon, Pao;IPR005312 Protein of unknown function DUF1759;IPR000477 Reverse transcriptase domain;IPR036397 Ribonuclease H superfamily;IPR041588 Integrase zinc-binding domain;IPR001584 Integrase, catalytic core;IPR012337 Ribonuclease H-like superfamily;IPR043502 DNA/RNA polyme…	go_function:GO:0003676 nucleic acid binding;go_process:GO:0015074 DNA integration	NA	NA	NA	March	March-UP g18801	March-UP g18801
g43598	Adra	March	-9.46536798584283	0.712116441961879	2.32841497131656e-05	0.000902176438523886	0	0	0	65	0	61	0	0	151	0	123	101	0	0	0	0	Scaffold_1937	902135	911003	NA	NA	-	NA	NA	NA	March	March-UP g43598	March-UP g43598
g26594	Adra	March	-2.6100427730132	4.5385872823752	2.4664100958308e-05	0.000950478903236559	429	1271	1757	263	1269	1284	1102	125	1204	2336	289	908	106	332	151	111	Scaffold_1163	12513	26246	NA	IPR003597 Immunoglobulin C1-set;IPR000353 MHC class II, beta chain, N-terminal;IPR014745 MHC class II, alpha/beta chain, N-terminal;IPR013783 Immunoglobulin-like fold;IPR007110 Immunoglobulin-like domain;IPR011162 MHC classes I/II-like antigen recognition protein;IPR036179 Immunoglobulin-like domain superfamily	go_process:GO:0019882 antigen processing and presentation;go_component:GO:0016020 membrane;go_component:GO:0042613 MHC class II protein complex;go_process:GO:0006955 immune response	NA	NA	NA	March	March-UP g26594	March-UP g26594
g50767	Adra	March	-3.74212197222754	1.60213969210771	2.60578233367339e-05	0.000993448708602612	27	44	171	129	0	76	48	183	202	157	260	75	19	16	0	5	Scaffold_2216	4105	10846	OEF1	NA	-	SAM domain-containing protein 9-like	NA	NA	March	March-UP g50767 OEF1	March-UP g50767
g18473	Adra	SPol	10.4515546639128	1.73531566934985	5.5029468519651e-33	2.98067116236689e-29	0	1	0	0	0	0	0	0	0	0	0	0	142	182	195	155	Scaffold_750	257144	261558	NA	IPR000477 Reverse transcriptase domain;IPR041588 Integrase zinc-binding domain;IPR001584 Integrase, catalytic core;IPR041577 Reverse transcriptase/retrotransposon-derived protein, RNase H-like domain;IPR036397 Ribonuclease H superfamily;IPR043128 Reverse transcriptase/Diguanylate cyclase domain;IPR012337 Ribonuclease H-like superfamily;IPR043502 DNA/RNA polymerase superfamily	go_process:GO:0015074 DNA integration;go_function:GO:0003676 nucleic acid binding	NA	NA	NA	Adra	Adra-UP g18473	Adra-UP g18473
g11938	Adra	SPol	10.9477451869772	2.22242898883618	1.1029939488247e-30	4.77949337904719e-27	3	0	172	517	0	0	0	0	4	0	244	0	262	334	126	235	Scaffold_516	1	3798	NA	NA	-	NA	NA	NA	Adra	Adra-UP g11938	Adra-UP g11938
g59807	Adra	SPol	9.6784144060869	0.983860834447087	1.11154881821462e-25	4.01380278257298e-22	0	0	0	0	0	0	0	0	0	0	0	0	76	106	111	105	Scaffold_2534	6110	6867	NA	NA	-	NA	NA	NA	Adra	Adra-UP g59807	Adra-UP g59807
g53592	Adra	SPol	9.78837706129766	1.08994688445327	4.00039645158459e-25	1.23817985028617e-21	0	0	64	0	0	0	0	0	0	0	0	0	102	141	75	113	Scaffold_2328	118998	132578	NA	NA	-	NA	NA	NA	Adra	Adra-UP g53592	Adra-UP g53592
g25695	Adra	SPol	8.52298003631313	9.12151899517809	7.27854034560863e-23	1.75218727919952e-19	25	520	56	73	54	78	88	97	3467	3113	301	216	9845	78834	6771	34095	Scaffold_1133	3106392	3125324	atp4a	IPR004014 Cation-transporting P-type ATPase, N-terminal;IPR023214 HAD superfamily;IPR023299 P-type ATPase, cytoplasmic domain N;IPR005775 P-type ATPase subfamily IIC, subunit alpha;IPR006068 Cation-transporting P-type ATPase, C-terminal;IPR001757 P-type ATPase;IPR044492 P-type ATPase, haloacid dehalogenase domain;IPR018303 P-type ATPase, phosphorylation site;IPR023298 P-type ATPase, transmembrane…	go_function:GO:0000166 nucleotide binding;go_component:GO:0016021 integral component of membrane;go_process:GO:0006813 potassium ion transport;go_function:GO:0005524 ATP binding;go_function:GO:0008556 P-type potassium transmembrane transporter activity;go_function:GO:0016887 ATPase	Na(+)/K(+) ATPase alpha-1 subunit	NA	NA	Adra	Adra-UP g25695 atp4a	Adra-UP g25695
g59808	Adra	SPol	9.03769211246376	0.370402892142328	1.10301821396989e-18	1.49362453899198e-15	0	0	0	0	0	0	0	0	0	0	0	0	59	57	67	68	Scaffold_2534	6897	12165	NA	NA	-	NA	NA	NA	Adra	Adra-UP g59808	Adra-UP g59808
g55413	Adra	SPol	3.00267306225586	5.50741137604048	2.43661657306939e-16	2.77851235116429e-13	204	255	503	675	193	182	374	289	335	651	810	413	1310	2671	1984	2705	Scaffold_2382	304563	315436	acyH	IPR000043 Adenosylhomocysteinase-like;IPR015878 S-adenosyl-L-homocysteine hydrolase, NAD binding domain;IPR042172 Adenosylhomocysteinase-like superfamily;IPR020082 S-adenosyl-L-homocysteine hydrolase, conserved site;IPR036291 NAD(P)-binding domain superfamily	go_function:GO:0004013 adenosylhomocysteinase activity	Adenosylhomocysteinase	Adenosylhomocysteinase	positive regulation of sodium ion transport; regulation of ion transmembrane transporter activity; angiotensin-activated signaling pathway; epithelial fluid transport; regulation of anion transport	Adra	Adra-UP g55413 acyH	Adra-UP g55413 Adenosylhomocysteinase
g48583	Adra	SPol	7.38590086563129	0.318232975121701	1.75670580949819e-15	1.73003582129944e-12	0	7	14	23	0	1	0	0	0	2	2	0	34	107	53	60	Scaffold_2127	56727	57131	NA	NA	-	NA	NA	NA	Adra	Adra-UP g48583	Adra-UP g48583
g15864	Adra	SPol	4.13074936316328	1.67881623355148	3.05933674976707e-15	2.88189521828058e-12	9	17	183	11	8	10	9	8	41	46	115	89	149	150	191	110	Scaffold_678	404418	411454	NA	NA	-	NA	NA	NA	Adra	Adra-UP g15864	Adra-UP g15864
g67588	Adra	SPol	8.3714757366139	-0.251091759022426	2.99700858538935e-14	2.59732752044183e-11	0	6	0	0	0	0	0	0	0	0	0	0	38	45	43	32	Scaffold_2812	490188	494017	NA	IPR043128 Reverse transcriptase/Diguanylate cyclase domain;IPR000477 Reverse transcriptase domain;IPR041588 Integrase zinc-binding domain;IPR036397 Ribonuclease H superfamily;IPR041577 Reverse transcriptase/retrotransposon-derived protein, RNase H-like domain;IPR001584 Integrase, catalytic core;IPR043502 DNA/RNA polymerase superfamily;IPR012337 Ribonuclease H-like superfamily	go_function:GO:0003676 nucleic acid binding;go_process:GO:0015074 DNA integration	NA	NA	NA	Adra	Adra-UP g67588	Adra-UP g67588
g72669	Adra	SPol	8.43432893086634	-0.195902769894587	1.32740039111341e-13	1.02847642700204e-10	0	1	0	0	0	0	0	0	0	0	0	0	47	33	41	41	Scaffold_3005	209643	211916	NA	IPR041588 Integrase zinc-binding domain;IPR001584 Integrase, catalytic core;IPR036397 Ribonuclease H superfamily;IPR012337 Ribonuclease H-like superfamily	go_process:GO:0015074 DNA integration;go_function:GO:0003676 nucleic acid binding	NA	NA	NA	Adra	Adra-UP g72669	Adra-UP g72669
g72598	Adra	SPol	3.25214189098673	5.5000620011739	1.89060815180473e-13	1.41247986955177e-10	211	402	795	919	146	115	233	491	899	710	885	681	1620	1423	2075	3451	Scaffold_3002	2028991	2052743	afg2	IPR001487 Bromodomain;IPR003593 AAA+ ATPase domain;IPR003959 ATPase, AAA-type, core;IPR036427 Bromodomain-like superfamily;IPR041569 AAA ATPase, AAA+ lid domain;IPR031252 ATPase family AAA domain-containing protein 2;IPR018359 Bromodomain, conserved site;IPR003960 ATPase, AAA-type, conserved site;IPR027417 P-loop containing nucleoside triphosphate hydrolase	go_function:GO:0005515 protein binding;go_function:GO:0005524 ATP binding;go_function:GO:0016887 ATPase;go_process:GO:0006355 regulation of transcription, DNA-templated;go_process:GO:0006325 chromatin organization	PAN	NA	NA	Adra	Adra-UP g72598 afg2	Adra-UP g72598
g62863	Adra	SPol	3.95947854827261	1.27739595497116	2.57473414908111e-13	1.85947300246638e-10	9	13	164	4	8	8	8	5	36	38	92	64	100	123	144	86	Scaffold_2634	240650	262180	NA	NA	-	NA	NA	NA	Adra	Adra-UP g62863	Adra-UP g62863
g34682	Adra	SPol	3.8509560806552	3.76761312876247	8.61718137973762e-13	5.65757126586046e-10	164	301	200	654	51	22	46	75	258	105	460	189	666	244	761	874	Scaffold_1569	16448	27029	NA	IPR006703 AIG1-type guanine nucleotide-binding (G) domain;IPR027417 P-loop containing nucleoside triphosphate hydrolase	go_function:GO:0005525 GTP binding	NA	NA	NA	Adra	Adra-UP g34682	Adra-UP g34682
g21466	Adra	SPol	2.67469276937586	5.02428148245523	1.84807399220687e-12	1.14401060329012e-09	364	531	946	1309	282	95	203	414	692	364	1250	402	1465	1279	1588	1368	Scaffold_923	19103	24614	NA	IPR029304 A-kinase anchor protein 2, C-terminal domain;IPR042779 MISP/MISP3	-	NA	NA	NA	Adra	Adra-UP g21466	Adra-UP g21466
g59246	Adra	SPol	3.42692098505679	7.51045846436544	8.37873168325141e-12	4.53834001623313e-09	259	761	383	780	540	971	463	1543	819	888	1252	1227	3712	5840	8821	17846	Scaffold_2521	200978	218099	ae1	IPR001717 Anion exchange protein;IPR003020 Bicarbonate transporter, eukaryotic;IPR011531 Bicarbonate transporter, C-terminal;IPR016152 Phosphotransferase/anion transporter;IPR013769 Band 3 cytoplasmic domain;IPR018241 Anion exchange, conserved site	go_process:GO:0006820 anion transport;go_function:GO:0005452 inorganic anion exchanger activity;go_component:GO:0016020 membrane;go_component:GO:0016021 integral component of membrane;go_function:GO:0008509 anion transmembrane transporter activity	AE 2	Electrogenic sodium bicarbonate cotransporter 1	renal system process; regulation of systemic arterial blood pressure; sodium ion transport; anion transport; chloride transport; cellular ion homeostasis; sodium ion transmembrane transport; negative regulation of urine volume; sodium ion export across plasma membrane; ion homeostasis; chloride transmembrane transport; proton transmembrane transport	Adra	Adra-UP g59246 ae1	Adra-UP g59246 Electrogenic sodium bicarbonate cotransporter 1
g33002	Adra	SPol	6.1442310632945	0.936380097491121	2.45736242478378e-11	1.29856620232599e-08	0	0	0	0	5	0	0	0	0	0	0	4	67	111	129	71	Scaffold_1473	980020	987964	NA	NA	-	NA	NA	NA	Adra	Adra-UP g33002	Adra-UP g33002
g27610	Adra	SPol	2.17662394679713	4.49926432997354	3.3539824136074e-11	1.73017578507661e-08	265	689	890	1163	174	159	184	404	384	272	611	189	511	895	1283	1222	Scaffold_1263	99721	107262	sens	IPR013087 Zinc finger C2H2-type;IPR036236 Zinc finger C2H2 superfamily	-	Zinc finger protein Gfi-1	NA	NA	Adra	Adra-UP g27610 sens	Adra-UP g27610
g38301	Adra	SPol	2.39812963890962	4.63983806436509	3.87276345869653e-11	1.92952150304954e-08	71	151	365	367	131	188	228	304	149	231	208	173	643	1951	721	1280	Scaffold_1751	1860560	1890697	ERR1	IPR001628 Zinc finger, nuclear hormone receptor-type;IPR001723 Nuclear hormone receptor;IPR000536 Nuclear hormone receptor, ligand-binding domain;IPR013088 Zinc finger, NHR/GATA-type;IPR027289 Oestrogen-related receptor;IPR024178 Oestrogen receptor/oestrogen-related receptor;IPR035500 Nuclear hormone receptor-like domain superfamily	go_function:GO:0008270 zinc ion binding;go_function:GO:0003700 DNA-binding transcription factor activity;go_process:GO:0006355 regulation of transcription, DNA-templated;go_function:GO:0043565 sequence-specific DNA binding;go_function:GO:0003707 steroid hormone receptor activity;go_function:GO:0003677 DNA binding;go_function:GO:0005496 steroid binding;go_component:GO:0005634 nucleus	ERR-alpha	NA	NA	Adra	Adra-UP g38301 ERR1	Adra-UP g38301
g2490	Adra	SPol	2.25867088234924	5.91746023393851	3.91853346876117e-11	1.92952150304954e-08	318	990	1064	1253	453	264	488	1222	1175	887	2849	860	2134	3205	2661	2438	Scaffold_119	169752	179418	amr	IPR000679 Zinc finger, GATA-type;IPR016374 Transcription factor, GATA-2/3;IPR013088 Zinc finger, NHR/GATA-type;IPR039355 Transcription factor GATA	go_function:GO:0008270 zinc ion binding;go_process:GO:0006355 regulation of transcription, DNA-templated;go_function:GO:0043565 sequence-specific DNA binding;go_function:GO:0000981 DNA-binding transcription factor activity, RNA polymerase II-specific;go_component:GO:0005634 nucleus;go_process:GO:0006357 regulation of transcription by RNA polymerase II;go_function:GO:0003700 DNA-binding transcript…	GATA-binding factor 3	NA	NA	Adra	Adra-UP g2490 amr	Adra-UP g2490
g99	Adra	SPol	3.20223774471373	1.93859776906139	4.02632357651283e-11	1.93854059130504e-08	0	0	16	18	16	15	21	27	33	18	17	16	106	201	105	329	Scaffold_1	1743961	1774285	al	IPR001356 Homeobox domain;IPR003654 OAR domain;IPR033203 Homeobox protein aristaless-like 4;IPR017970 Homeobox, conserved site;IPR009057 Homeobox-like domain superfamily	go_function:GO:0003677 DNA binding;go_process:GO:0006357 regulation of transcription by RNA polymerase II;go_process:GO:0007275 multicellular organism development;go_function:GO:0003700 DNA-binding transcription factor activity;go_process:GO:0006355 regulation of transcription, DNA-templated;go_function:GO:0000981 DNA-binding transcription factor activity, RNA polymerase II-specific	Homeobox protein goosecoid	NA	NA	Adra	Adra-UP g99 al	Adra-UP g99
g59806	Adra	SPol	6.65535656179589	-0.417176049549677	1.22310610839146e-10	5.29996338888186e-08	0	0	0	0	0	0	0	1	0	0	0	0	36	33	45	22	Scaffold_2534	5742	6005	NA	NA	NA	NA	NA	NA	Adra	Adra-UP g59806	Adra-UP g59806
g14004	Adra	SPol	3.02649251008339	4.96857062050402	1.25340151486782e-10	5.32474455316201e-08	121	112	183	591	154	52	206	363	464	361	746	333	1282	1634	1636	1181	Scaffold_619	734	19107	pkpA	IPR000719 Protein kinase domain;IPR024678 Serine/threonine-protein kinase OSR1/WNK, CCT domain;IPR008271 Serine/threonine-protein kinase, active site;IPR011009 Protein kinase-like domain superfamily	go_function:GO:0004672 protein kinase activity;go_process:GO:0006468 protein phosphorylation;go_function:GO:0005524 ATP binding;go_function:GO:0004674 protein serine/threonine kinase activity	Protein kinase with no lysine 1	NA	NA	Adra	Adra-UP g14004 pkpA	Adra-UP g14004
g26328	Adra	SPol	2.1866684622926	5.76899524947164	2.69359252543017e-10	9.8914196027068e-08	331	824	1023	1299	463	295	405	1116	1184	604	1763	1004	1880	1685	2631	3039	Scaffold_1152	5091960	5100597	NA	IPR019734 Tetratricopeptide repeat;IPR011990 Tetratricopeptide-like helical domain superfamily;IPR042161 Tetratricopeptide repeat protein 34	go_function:GO:0005515 protein binding	NA	NA	NA	Adra	Adra-UP g26328	Adra-UP g26328
g56865	Adra	SPol	2.80042627994247	6.36637449991716	2.75613626341686e-10	9.9524080471983e-08	357	668	1644	1860	338	382	750	694	696	1266	1426	689	3100	7122	2469	2778	Scaffold_2425	1634444	1637645	nhe3	IPR004709 Na+/H+ exchanger;IPR006153 Cation/H+ exchanger;IPR018422 Cation/H+ exchanger, CPA1 family	go_component:GO:0016021 integral component of membrane;go_function:GO:0015385 sodium:proton antiporter activity;go_process:GO:0055085 transmembrane transport;go_process:GO:0006814 sodium ion transport;go_process:GO:0006885 regulation of pH;go_function:GO:0015299 solute:proton antiporter activity;go_process:GO:0006812 cation transport	Sodium/hydrogen exchanger 3	NA	NA	Adra	Adra-UP g56865 nhe3	Adra-UP g56865
g14748	Adra	SPol	3.99849170591275	7.54026651424083	9.60374764826121e-10	2.85033967872914e-07	483	1706	1138	3092	372	377	473	1343	1620	901	2804	1360	3387	3142	13939	16670	Scaffold_629	2448524	2457215	nt5c2	IPR008380 HAD-superfamily hydrolase, subfamily IG, 5'-nucleotidase;IPR023214 HAD superfamily;IPR016695 Purine 5'-nucleotidase;IPR036412 HAD-like superfamily	-	Cytosolic 5'-nucleotidase II	NA	NA	Adra	Adra-UP g14748 nt5c2	Adra-UP g14748
g3375	Adra	SPol	6.1886459564076	0.433922165509434	1.48283344504026e-09	3.77965522591087e-07	3	32	0	1	0	0	3	0	15	78	28	23	36	96	33	113	Scaffold_144	227837	244939	NA	NA	-	NA	NA	NA	Adra	Adra-UP g3375	Adra-UP g3375
g56864	Adra	SPol	2.58771404014659	5.71328929187568	1.94638627588906e-09	4.68560056149027e-07	254	471	895	1140	243	319	551	416	501	828	894	544	1912	4262	1655	1786	Scaffold_2425	1622780	1631755	NA	NA	-	NA	NA	NA	Adra	Adra-UP g56864	Adra-UP g56864
g18510	Adra	SPol	2.91674625527542	8.58935850885956	2.68101392005894e-09	6.17945187148903e-07	1929	6089	6031	5765	2193	1029	1622	6004	2411	2189	5303	2929	10633	11546	19130	30862	Scaffold_752	139605	149650	cahz	IPR001148 Alpha carbonic anhydrase domain;IPR036398 Alpha carbonic anhydrase domain superfamily;IPR023561 Carbonic anhydrase, alpha-class;IPR018338 Carbonic anhydrase, alpha-class, conserved site	go_function:GO:0008270 zinc ion binding;go_function:GO:0004089 carbonate dehydratase activity	Carbonic anhydrase	Carbonic anhydrase	regulation of chloride transport; hypotonic salinity response; angiotensin-activated signaling pathway	Adra	Adra-UP g18510 cahz	Adra-UP g18510 Carbonic anhydrase
g65262	Adra	SPol	2.13812860214243	5.71825054359581	2.90865490292923e-09	6.6335702238805e-07	414	949	953	1453	371	328	548	913	808	1033	2117	647	1528	1563	2640	3230	Scaffold_2719	1955762	1959287	NA	IPR003961 Fibronectin type III;IPR013783 Immunoglobulin-like fold;IPR015152 Growth hormone/erythropoietin receptor, ligand binding;IPR009167 Erythropoietin receptor;IPR036116 Fibronectin type III superfamily	go_function:GO:0005515 protein binding;go_component:GO:0016021 integral component of membrane;go_function:GO:0004888 transmembrane signaling receptor activity	NA	NA	NA	Adra	Adra-UP g65262	Adra-UP g65262
g14006	Adra	SPol	2.08726939716778	4.08413073828142	3.08899337203128e-09	6.97147191650309e-07	61	166	212	309	228	115	164	171	259	185	396	209	560	657	959	633	Scaffold_619	22392	32913	WNK4	NA	-	Protein kinase lysine-deficient 4	NA	NA	Adra	Adra-UP g14006 WNK4	Adra-UP g14006
g427	Adra	SPol	2.64897627489162	5.31257879998983	3.29287116012655e-09	7.35498418095895e-07	281	433	425	1080	176	119	318	643	838	596	1614	595	1539	1441	2144	1887	Scaffold_28	226411	244193	DMT	IPR002492 Transposase, Tc1-like;IPR036886 Villin headpiece domain superfamily;IPR032402 Putative adherens-junction anchoring domain;IPR038717 Tc1-like transposase, DDE domain;IPR036397 Ribonuclease H superfamily	go_function:GO:0003677 DNA binding;go_process:GO:0015074 DNA integration;go_process:GO:0006313 transposition, DNA-mediated;go_function:GO:0003779 actin binding;go_process:GO:0007010 cytoskeleton organization;go_function:GO:0003676 nucleic acid binding	Dematin	NA	NA	Adra	Adra-UP g427 DMT	Adra-UP g427
g26329	Adra	SPol	3.53746484360687	8.50689131729573	4.62058322091104e-09	1.01120763701271e-06	1033	3228	1863	3160	1482	447	964	4215	2353	1796	3281	1633	12291	9916	15566	33059	Scaffold_1152	5102748	5113840	hem1	IPR015118 5-aminolevulinate synthase presequence;IPR004839 Aminotransferase, class I/classII;IPR015422 Pyridoxal phosphate-dependent transferase, small domain;IPR015421 Pyridoxal phosphate-dependent transferase, major domain;IPR010961 Tetrapyrrole biosynthesis, 5-aminolevulinic acid synthase;IPR001917 Aminotransferase, class-II, pyridoxal-phosphate binding site;IPR015424 Pyridoxal phosphate-depen…	go_process:GO:0006778 porphyrin-containing compound metabolic process;go_function:GO:0003870 5-aminolevulinate synthase activity;go_function:GO:0030170 pyridoxal phosphate binding;go_component:GO:0005759 mitochondrial matrix;go_process:GO:0009058 biosynthetic process;go_function:GO:0003824 catalytic activity;go_process:GO:0033014 tetrapyrrole biosynthetic process;go_function:GO:0016740 transferas…	5-aminolevulinic acid synthase	NA	NA	Adra	Adra-UP g26329 hem1	Adra-UP g26329
g50859	Adra	SPol	2.05916215344289	6.31431477139927	5.34212740714989e-09	1.1574253240331e-06	597	1364	1770	2964	626	410	870	1557	2031	2153	3624	1463	3390	3264	2572	4008	Scaffold_2217	631313	640527	rhbg	IPR002229 Blood group Rhesus C/E/D polypeptide;IPR024041 Ammonium transporter AmtB-like domain;IPR029020 Ammonium/urea transporter	go_component:GO:0005887 integral component of plasma membrane;go_function:GO:0008519 ammonium transmembrane transporter activity;go_process:GO:0015696 ammonium transport;go_component:GO:0016020 membrane	Ammonium transporter Rh type B	NA	NA	Adra	Adra-UP g50859 rhbg	Adra-UP g50859
g65257	Adra	SPol	2.02973392263596	4.2568756192877	7.01906350940032e-09	1.49093166661439e-06	126	188	244	298	155	98	192	413	272	296	492	222	595	774	914	912	Scaffold_2719	1914063	1916194	tmem205	IPR025423 Domain of unknown function DUF4149;IPR042623 Transmembrane protein 205	-	Transmembrane protein 205	NA	NA	Adra	Adra-UP g65257 tmem205	Adra-UP g65257
g63879	Adra	SPol	9.57319083719029	4.10934509303317	7.19868435902495e-09	1.49967976271764e-06	6	454	877	0	0	4	0	0	0	0	0	0	80	390	2402	672	Scaffold_2669	7183	10399	NA	IPR023341 MABP domain	-	NA	NA	NA	Adra	Adra-UP g63879	Adra-UP g63879
g56869	Adra	SPol	2.52056675920464	9.41799360411305	1.92200884402999e-08	3.65282838725911e-06	3791	6631	17747	15636	3465	3547	7960	5814	6129	11008	12214	6988	24089	54104	20723	26207	Scaffold_2425	1640709	1656054	nhe3	IPR018410 Na+/H+ exchanger, isoforms 3/5;IPR006153 Cation/H+ exchanger;IPR004709 Na+/H+ exchanger;IPR018422 Cation/H+ exchanger, CPA1 family	go_component:GO:0016021 integral component of membrane;go_function:GO:0015385 sodium:proton antiporter activity;go_process:GO:0006814 sodium ion transport;go_process:GO:0006885 regulation of pH;go_function:GO:0015299 solute:proton antiporter activity;go_process:GO:0055085 transmembrane transport;go_process:GO:0006812 cation transport	Solute carrier family 9 member 1	NA	NA	Adra	Adra-UP g56869 nhe3	Adra-UP g56869
g25215	Adra	SPol	2.05205189169151	5.86618630271092	2.82379128878268e-08	4.9334789749823e-06	341	305	386	1229	720	322	413	1150	610	729	1872	1151	2085	1537	2550	3519	Scaffold_1126	4087457	4113643	Elf	IPR001605 Pleckstrin homology domain, spectrin-type;IPR018159 Spectrin/alpha-actinin;IPR001849 Pleckstrin homology domain;IPR041681 Pleckstrin homology domain 9;IPR016343 Spectrin, beta subunit;IPR002017 Spectrin repeat;IPR011993 PH-like domain superfamily	go_function:GO:0005515 protein binding;go_function:GO:0005543 phospholipid binding;go_function:GO:0003779 actin binding;go_function:GO:0005200 structural constituent of cytoskeleton;go_component:GO:0008091 spectrin	Beta-I spectrin	NA	NA	Adra	Adra-UP g25215 Elf	Adra-UP g25215
g39238	Adra	SPol	2.28138822381783	4.88889546259907	3.78629975141376e-08	6.40890393860394e-06	312	854	810	754	249	109	280	497	396	348	837	346	721	1025	1475	1992	Scaffold_1795	116805	123335	hba	IPR002338 Haemoglobin, alpha-type;IPR000971 Globin;IPR012292 Globin/Protoglobin;IPR009050 Globin-like superfamily	go_component:GO:0005833 hemoglobin complex;go_process:GO:0015671 oxygen transport;go_function:GO:0020037 heme binding;go_function:GO:0019825 oxygen binding	Alpha-globin	NA	NA	Adra	Adra-UP g39238 hba	Adra-UP g39238
g69450	Adra	SPol	3.19945170443834	3.8876708314334	3.87505503631612e-08	6.49032388279972e-06	14	34	534	118	54	49	31	226	95	89	42	98	566	1052	246	1021	Scaffold_2878	65837	89881	cgn	IPR002928 Myosin tail	go_component:GO:0016459 myosin complex	Myosin heavy chain 9	NA	NA	Adra	Adra-UP g69450 cgn	Adra-UP g69450
g27920	Adra	SPol	2.30697995196353	2.34716298308258	3.89431415473075e-08	6.49032388279972e-06	130	362	469	277	76	38	22	46	22	43	57	35	162	308	187	232	Scaffold_1270	306798	311706	NA	IPR000315 B-box-type zinc finger	go_function:GO:0008270 zinc ion binding	NA	NA	NA	Adra	Adra-UP g27920	Adra-UP g27920
g60771	Adra	SPol	2.39107486603162	4.02987923336644	4.07827378703536e-08	6.67003853177551e-06	211	497	580	716	85	61	154	294	345	202	406	173	451	648	730	1076	Scaffold_2560	595496	600074	RH50	IPR002229 Blood group Rhesus C/E/D polypeptide;IPR024041 Ammonium transporter AmtB-like domain;IPR029020 Ammonium/urea transporter	go_component:GO:0005887 integral component of plasma membrane;go_function:GO:0008519 ammonium transmembrane transporter activity;go_process:GO:0015696 ammonium transport;go_component:GO:0016020 membrane	Ammonium transporter Rh type B	NA	NA	Adra	Adra-UP g60771 RH50	Adra-UP g60771
g71551	Adra	SPol	2.34362224586451	6.36759807705397	4.12337906320647e-08	6.67003853177551e-06	789	10027	10182	8238	891	609	337	1266	905	733	532	375	2492	7594	1808	3274	Scaffold_2967	4680	14391	NA	IPR001506 Peptidase M12A;IPR006026 Peptidase, metallopeptidase;IPR024079 Metallopeptidase, catalytic domain superfamily	go_process:GO:0006508 proteolysis;go_function:GO:0004222 metalloendopeptidase activity;go_function:GO:0008270 zinc ion binding;go_function:GO:0008237 metallopeptidase activity	NA	NA	NA	Adra	Adra-UP g71551	Adra-UP g71551
g34428	Adra	SPol	3.39971370746531	2.95625221116399	4.12528922393575e-08	6.67003853177551e-06	53	0	200	28	20	53	10	69	0	0	0	0	208	314	641	286	Scaffold_1553	13988	14709	HSPA12A	IPR043129 ATPase, nucleotide binding domain	-	Heat shock 70 kDa protein 12A	NA	NA	Adra	Adra-UP g34428 HSPA12A	Adra-UP g34428
g37061	Adra	SPol	2.76417752539701	3.40746853044944	4.60709733141341e-08	7.18110581168366e-06	72	85	292	232	58	81	38	128	203	565	355	186	508	912	257	255	Scaffold_1678	634194	638186	CST	IPR009729 Galactose-3-O-sulfotransferase;IPR027417 P-loop containing nucleoside triphosphate hydrolase	go_component:GO:0016021 integral component of membrane;go_function:GO:0001733 galactosylceramide sulfotransferase activity;go_process:GO:0009247 glycolipid biosynthetic process	3'-phosphoadenosine-5'-phosphosulfate:GalCer sulfotransferase	NA	NA	Adra	Adra-UP g37061 CST	Adra-UP g37061
g72009	Adra	SPol	3.48632225819363	1.35836567047095	4.75654212368985e-08	7.36108868941888e-06	17	51	77	38	11	6	13	13	4	7	7	18	62	72	93	269	Scaffold_2984	237882	238133	NA	NA	NA	NA	NA	NA	Adra	Adra-UP g72009	Adra-UP g72009
g9247	Adra	SPol	2.37605307396557	3.55424980038132	4.94186876097951e-08	7.54017806868888e-06	133	318	358	341	44	59	112	213	162	215	463	155	444	489	536	556	Scaffold_385	2687952	2690969	scl	IPR011598 Myc-type, basic helix-loop-helix (bHLH) domain;IPR036638 Helix-loop-helix DNA-binding domain superfamily;IPR040238 Helix-loop-helix protein TAL-like	go_function:GO:0046983 protein dimerization activity;go_function:GO:0000981 DNA-binding transcription factor activity, RNA polymerase II-specific;go_process:GO:0006357 regulation of transcription by RNA polymerase II	TAL-1	NA	NA	Adra	Adra-UP g9247 scl	Adra-UP g9247
g41327	Adra	SPol	4.22074616542065	6.87528429339455	7.1722509812327e-08	1.06015046728138e-05	1479	2044	3498	3035	345	53	578	193	0	43	0	16	5326	10847	3368	4192	Scaffold_1879	5071120	5077760	aga	IPR006035 Ureohydrolase;IPR014033 Arginase;IPR020855 Ureohydrolase, manganese-binding site;IPR023696 Ureohydrolase domain superfamily	go_function:GO:0046872 metal ion binding;go_process:GO:0006525 arginine metabolic process;go_function:GO:0004053 arginase activity;go_function:GO:0016813 hydrolase activity, acting on carbon-nitrogen (but not peptide) bonds, in linear amidines	Arginase-1	NA	NA	Adra	Adra-UP g41327 aga	Adra-UP g41327
g18582	Adra	SPol	2.17922142052253	3.10474330231975	7.44465436322117e-08	1.07532721310149e-05	37	95	87	97	42	66	81	156	171	142	199	153	306	269	400	468	Scaffold_754	291745	297243	NA	IPR000315 B-box-type zinc finger;IPR013083 Zinc finger, RING/FYVE/PHD-type;IPR018957 Zinc finger, C3HC4 RING-type;IPR036397 Ribonuclease H superfamily;IPR043136 B30.2/SPRY domain superfamily;IPR017907 Zinc finger, RING-type, conserved site;IPR001841 Zinc finger, RING-type;IPR013320 Concanavalin A-like lectin/glucanase domain superfamily	go_function:GO:0008270 zinc ion binding;go_function:GO:0046872 metal ion binding;go_function:GO:0003676 nucleic acid binding	NA	NA	NA	Adra	Adra-UP g18582	Adra-UP g18582
g67271	Adra	SPol	2.13409002149303	4.66545620681042	7.44480208461294e-08	1.07532721310149e-05	160	377	426	366	204	96	251	529	265	307	726	305	807	994	1014	1529	Scaffold_2802	1295787	1304073	NA	NA	-	NA	NA	NA	Adra	Adra-UP g67271	Adra-UP g67271
g15670	Adra	SPol	4.60820356108071	-0.47666378970908	7.54838843412915e-08	1.08306876697909e-05	0	7	13	39	2	2	0	1	3	2	5	1	21	64	17	34	Scaffold_664	184240	185277	NA	IPR000477 Reverse transcriptase domain;IPR043502 DNA/RNA polymerase superfamily	-	NA	NA	NA	Adra	Adra-UP g15670	Adra-UP g15670
g14745	Adra	SPol	7.2950581093346	-1.1979523747714	7.88370587818798e-08	1.1163945853387e-05	0	0	0	4	0	0	0	0	0	6	4	0	21	34	10	11	Scaffold_629	2353455	2354517	NA	NA	-	NA	NA	NA	Adra	Adra-UP g14745	Adra-UP g14745
g60147	Adra	SPol	12.2913872641734	6.02254680632109	8.13556529093258e-08	1.13366360291343e-05	0	42	0	14	0	0	2	0	14	29	0	5	1020	14158	192	203	Scaffold_2541	2931	23036	tsc	IPR004841 Amino acid permease/ SLC12A domain;IPR018491 SLC12A transporter, C-terminal	go_process:GO:0055085 transmembrane transport;go_component:GO:0016020 membrane;go_process:GO:0006811 ion transport;go_function:GO:0022857 transmembrane transporter activity	Na-Cl symporter	NA	NA	Adra	Adra-UP g60147 tsc	Adra-UP g60147
g9653	Adra	SPol	2.27113738197885	6.57895911617748	8.39320086572037e-08	1.15826171946941e-05	518	1326	1215	1537	970	368	681	1782	1101	1002	2167	981	2351	2946	4905	6568	Scaffold_407	1708663	1710335	NA	NA	-	NA	NA	NA	Adra	Adra-UP g9653	Adra-UP g9653
g23646	Adra	SPol	3.11468232104797	-0.0893289007613471	1.30814348027178e-07	1.66719039079814e-05	3	21	13	11	6	4	1	9	0	6	5	3	35	50	29	51	Scaffold_1064	227971	228792	NA	IPR013830 SGNH hydrolase-type esterase domain	-	NA	NA	NA	Adra	Adra-UP g23646	Adra-UP g23646
g12490	Adra	SPol	3.00990775342397	1.64787165784852	1.72444371602868e-07	2.11083601985748e-05	13	14	18	54	22	10	5	44	22	39	91	36	94	106	181	189	Scaffold_557	461998	475746	mGluR	IPR001458 GPCR, family 3, metabotropic glutamate receptor 2;IPR000337 GPCR, family 3;IPR000162 GPCR, family 3, metabotropic glutamate receptor;IPR017978 GPCR family 3, C-terminal;IPR038550 GPCR, family 3, nine cysteines domain superfamily;IPR001828 Receptor, ligand binding region;IPR011500 GPCR, family 3, nine cysteines domain;IPR017979 GPCR, family 3, conserved site;IPR028082 Periplasmic binding…	go_component:GO:0016021 integral component of membrane;go_process:GO:0007186 G protein-coupled receptor signaling pathway;go_function:GO:0004930 G protein-coupled receptor activity	Metabotropic glutamate receptor 3	NA	NA	Adra	Adra-UP g12490 mGluR	Adra-UP g12490
g56487	Adra	SPol	8.69766078105339	0.046840757472659	2.14172714823461e-07	2.53566450238531e-05	0	0	0	0	0	0	0	0	0	0	0	0	22	32	128	11	Scaffold_2414	139291	177526	NA	IPR000569 HECT domain;IPR035983 HECT, E3 ligase catalytic domain	go_function:GO:0004842 ubiquitin-protein transferase activity	NA	NA	NA	Adra	Adra-UP g56487	Adra-UP g56487
g3994	Adra	SPol	3.09279369026777	0.524463907315714	2.30138273396619e-07	2.68073969430707e-05	0	5	5	6	6	4	3	21	6	4	6	0	44	67	85	60	Scaffold_176	168852	172087	NA	IPR002492 Transposase, Tc1-like;IPR038717 Tc1-like transposase, DDE domain;IPR036397 Ribonuclease H superfamily;IPR009057 Homeobox-like domain superfamily	go_function:GO:0003677 DNA binding;go_process:GO:0015074 DNA integration;go_process:GO:0006313 transposition, DNA-mediated;go_function:GO:0003676 nucleic acid binding	NA	NA	NA	Adra	Adra-UP g3994	Adra-UP g3994
g5503	Adra	SPol	2.05361431115483	12.9367319988508	2.81996568371005e-07	3.16566717633482e-05	76143	240901	212219	138630	80080	48203	64366	154996	100229	103924	120839	100121	152084	253745	418370	526682	Scaffold_235	1223769	1224394	hba	IPR002338 Haemoglobin, alpha-type;IPR000971 Globin;IPR012292 Globin/Protoglobin;IPR009050 Globin-like superfamily	go_component:GO:0005833 hemoglobin complex;go_process:GO:0015671 oxygen transport;go_function:GO:0020037 heme binding;go_function:GO:0019825 oxygen binding	Alpha-globin	NA	NA	Adra	Adra-UP g5503 hba	Adra-UP g5503
g54628	Adra	SPol	7.71265331501094	3.33232104929575	3.64049171875813e-07	3.84755578432262e-05	17	5	7	38	0	6	0	4	8	17	0	6	984	737	36	175	Scaffold_2353	944557	954245	NA	IPR023412 Ribonuclease A-domain;IPR036816 Ribonuclease A-like domain superfamily;IPR001427 Pancreatic ribonuclease;IPR023411 Ribonuclease A, active site	go_function:GO:0003676 nucleic acid binding	NA	NA	NA	Adra	Adra-UP g54628	Adra-UP g54628
g16476	Adra	SPol	2.66069370492437	3.96081716644082	4.35122400428754e-07	4.53238554215836e-05	67	119	195	260	73	29	145	231	301	260	675	189	548	626	833	765	Scaffold_691	2758932	2785371	septin3	IPR030379 Septin-type guanine nucleotide-binding (G) domain;IPR016491 Septin;IPR027417 P-loop containing nucleoside triphosphate hydrolase	go_function:GO:0005525 GTP binding	Neuronal-specific septin-3	NA	NA	Adra	Adra-UP g16476 septin3	Adra-UP g16476
g71752	Adra	SPol	3.55141172890913	3.33600446984027	5.09898996055033e-07	5.2357685538049e-05	9	20	69	119	45	22	23	97	75	74	92	25	164	155	589	1088	Scaffold_2977	1042762	1080742	mtgr1	IPR013289 CBFA2T family;IPR013290 Protein CBFA2T1;IPR003894 TAFH/NHR1;IPR002893 Zinc finger, MYND-type;IPR037249 TAFH/NHR1 domain superfamily;IPR014896 NHR2-like	go_function:GO:0003714 transcription corepressor activity;go_process:GO:0045892 negative regulation of transcription, DNA-templated;go_process:GO:0006351 transcription, DNA-templated	MTG8-like protein	NA	NA	Adra	Adra-UP g71752 mtgr1	Adra-UP g71752
g8242	Adra	SPol	2.50544631468979	4.63661260932232	5.49725020642849e-07	5.52235815321952e-05	155	344	309	501	101	69	206	503	489	296	892	291	994	1230	1183	940	Scaffold_344	2323642	2326281	bPT2	IPR000217 Tubulin;IPR002453 Beta tubulin;IPR003008 Tubulin/FtsZ, GTPase domain;IPR018316 Tubulin/FtsZ, 2-layer sandwich domain;IPR037103 Tubulin/FtsZ-like, C-terminal domain;IPR023123 Tubulin, C-terminal;IPR036525 Tubulin/FtsZ, GTPase domain superfamily;IPR013838 Beta tubulin, autoregulation binding site;IPR017975 Tubulin, conserved site;IPR008280 Tubulin/FtsZ, C-terminal	go_process:GO:0007017 microtubule-based process;go_component:GO:0005874 microtubule;go_function:GO:0005200 structural constituent of cytoskeleton;go_function:GO:0005525 GTP binding	Tubulin beta chain	NA	NA	Adra	Adra-UP g8242 bPT2	Adra-UP g8242
g67071	Adra	SPol	10.9055774634851	4.64090477484735	8.1422547566416e-07	7.77136967213202e-05	0	11	0	0	0	0	2	0	0	11	0	0	390	5419	79	72	Scaffold_2793	229403	240622	tsc	IPR018491 SLC12A transporter, C-terminal;IPR004841 Amino acid permease/ SLC12A domain	go_process:GO:0006811 ion transport;go_function:GO:0022857 transmembrane transporter activity;go_component:GO:0016020 membrane;go_process:GO:0055085 transmembrane transport	Bumetanide-sensitive sodium-(potassium)-chloride cotransporter 2	Bumetanide-sensitive sodium-(potassium)-chloride cotransporter 2	cellular hyperosmotic salinity response; potassium, sodium and chloride transmembrane ion transport; cellular ion homeostasis; cell volume homeostasis; hyperosmotic response	Adra	Adra-UP g67071 tsc	Adra-UP g67071 Bumetanide-sensitive sodium-(potassium)-chloride cotransporter 2
g61737	Adra	SPol	2.82611781332422	1.28962949888096	8.97977859566348e-07	8.458951437115e-05	110	73	192	146	11	17	21	9	15	153	71	10	48	131	114	158	Scaffold_2595	171817	175421	NA	IPR002181 Fibrinogen, alpha/beta/gamma chain, C-terminal globular domain;IPR014716 Fibrinogen, alpha/beta/gamma chain, C-terminal globular, subdomain 1;IPR020837 Fibrinogen, conserved site;IPR036056 Fibrinogen-like, C-terminal	-	NA	NA	NA	Adra	Adra-UP g61737	Adra-UP g61737
g45228	Adra	SPol	4.22637157075525	-0.758014788812421	9.6411398636378e-07	8.88872069300326e-05	9	7	4	2	0	1	3	1	1	10	8	2	14	39	19	35	Scaffold_2013	791368	791676	NA	NA	-	NA	NA	NA	Adra	Adra-UP g45228	Adra-UP g45228
g38302	Adra	SPol	2.43694526507469	0.896608924306775	1.69586466906303e-06	0.000144655920944566	2	13	28	20	13	12	11	26	5	10	24	9	39	127	47	122	Scaffold_1751	1893094	1900561	NA	NA	-	NA	NA	NA	Adra	Adra-UP g38302	Adra-UP g38302
g23173	Adra	SPol	9.39888973702536	4.78390362152364	1.80625879363755e-06	0.000151683732647097	0	13	0	0	0	4	0	5	11	7	3	4	476	5910	72	98	Scaffold_1030	36695	51130	tsc	IPR004841 Amino acid permease/ SLC12A domain;IPR013612 Amino acid permease, N-terminal	go_process:GO:0055085 transmembrane transport;go_component:GO:0016020 membrane	Bumetanide-sensitive sodium-(potassium)-chloride cotransporter 2	Bumetanide-sensitive sodium-(potassium)-chloride cotransporter 2	cellular hyperosmotic salinity response; potassium, sodium and chloride transmembrane ion transport; cellular ion homeostasis; cell volume homeostasis; hyperosmotic response	Adra	Adra-UP g23173 tsc	Adra-UP g23173 Bumetanide-sensitive sodium-(potassium)-chloride cotransporter 2
g15712	Adra	SPol	8.8623046996112	4.17445491785101	1.82900198846236e-06	0.000152412142623175	6	483	1042	0	0	7	0	0	0	0	0	0	74	365	2533	731	Scaffold_669	21702	26164	NA	IPR023341 MABP domain	-	NA	NA	NA	Adra	Adra-UP g15712	Adra-UP g15712
g29838	Adra	SPol	9.36094844876684	0.663284987037066	1.84217262582318e-06	0.000152921502341322	12	18	572	4	0	0	0	0	0	0	0	0	118	9	142	9	Scaffold_1340	655974	661727	NA	IPR013783 Immunoglobulin-like fold	-	NA	NA	NA	Adra	Adra-UP g29838	Adra-UP g29838
g3267	Adra	SPol	2.53384679020946	5.3216564188068	2.33783809905541e-06	0.000187598519459757	213	469	1106	733	448	127	302	397	173	119	192	248	730	1683	3401	1280	Scaffold_143	810521	817890	cyp3a27	IPR002401 Cytochrome P450, E-class, group I;IPR001128 Cytochrome P450;IPR036396 Cytochrome P450 superfamily;IPR017972 Cytochrome P450, conserved site	go_function:GO:0004497 monooxygenase activity;go_function:GO:0020037 heme binding;go_function:GO:0005506 iron ion binding;go_function:GO:0016705 oxidoreductase activity, acting on paired donors, with incorporation or reduction of molecular oxygen	Cytochrome P450-PCN1	NA	NA	Adra	Adra-UP g3267 cyp3a27	Adra-UP g3267
g38816	Adra	SPol	2.21715203804986	3.71702440673675	2.43815219399877e-06	0.000194926219317997	242	325	189	488	129	56	76	291	156	179	304	283	266	436	716	880	Scaffold_1772	28560	40549	NA	IPR002347 Short-chain dehydrogenase/reductase SDR;IPR036291 NAD(P)-binding domain superfamily	go_function:GO:0016491 oxidoreductase activity	NA	NA	NA	Adra	Adra-UP g38816	Adra-UP g38816
g34814	Adra	SPol	4.92470416066279	0.0357073406197378	2.56949037336472e-06	0.000204671244225441	20	45	54	76	6	0	0	0	1	4	8	0	50	56	38	47	Scaffold_1579	595161	601433	NA	NA	-	NA	NA	NA	Adra	Adra-UP g34814	Adra-UP g34814
g5065	Adra	SPol	5.55283946175008	1.61477645384369	2.79782492890691e-06	0.000221232390181376	0	13	0	52	0	0	7	6	2	30	0	0	252	178	92	47	Scaffold_216	2662955	2667713	NA	NA	-	NA	NA	NA	Adra	Adra-UP g5065	Adra-UP g5065
g9073	Adra	SPol	6.13431192568997	-0.779384902277109	3.57558866460289e-06	0.000276958196969255	1	0	0	0	0	0	1	0	16	11	0	0	8	36	53	9	Scaffold_381	15737	19045	NA	NA	-	NA	NA	NA	Adra	Adra-UP g9073	Adra-UP g9073
g13959	Adra	SPol	10.2421692676618	1.52619221199637	3.83624598950183e-06	0.000292662343692066	0	2	38	0	0	0	0	0	0	5	6	17	63	5	453	22	Scaffold_616	404814	409468	NA	NA	-	NA	NA	NA	Adra	Adra-UP g13959	Adra-UP g13959
g69449	Adra	SPol	2.62051486748406	1.8472647884025	3.93947199496393e-06	0.000298837396498643	0	0	104	57	15	27	13	60	40	34	9	19	143	261	58	191	Scaffold_2878	45322	65531	mhcA	IPR001609 Myosin head, motor domain;IPR036961 Kinesin motor domain superfamily;IPR027417 P-loop containing nucleoside triphosphate hydrolase	go_function:GO:0003774 motor activity;go_function:GO:0005524 ATP binding;go_component:GO:0016459 myosin complex	MyHC-beta	NA	NA	Adra	Adra-UP g69449 mhcA	Adra-UP g69449
g48006	Adra	SPol	4.03203734276047	-0.222007985352611	4.0995480421337e-06	0.000308405582919683	1	4	6	9	1	1	2	6	3	1	10	1	33	73	39	11	Scaffold_2111	1024531	1025217	NA	IPR015095 Alkylated DNA repair protein AlkB, homologue 8, N-terminal	go_function:GO:0016706 2-oxoglutarate-dependent dioxygenase activity;go_function:GO:0008168 methyltransferase activity	NA	NA	NA	Adra	Adra-UP g48006	Adra-UP g48006
g7260	Adra	SPol	3.83227178569659	2.13293344429584	4.23236917058307e-06	0.000316201760171906	15	19	3	85	10	4	24	22	92	45	379	63	369	245	67	103	Scaffold_308	1366680	1416027	NA	NA	-	NA	NA	NA	Adra	Adra-UP g7260	Adra-UP g7260
g47099	Adra	SPol	2.1018104089801	3.10425014219831	5.21784716351532e-06	0.000378730557371708	76	161	267	285	74	27	109	144	140	169	268	119	288	417	416	317	Scaffold_2075	389116	435353	NHERF	IPR001478 PDZ domain;IPR015098 EBP50, C-terminal;IPR036034 PDZ superfamily;IPR031197 Na(+)/H(+) exchange regulatory cofactor NHERF-2	go_function:GO:0005515 protein binding;go_function:GO:0060090 molecular adaptor activity	EBP50	NA	NA	Adra	Adra-UP g47099 NHERF	Adra-UP g47099
g70219	Adra	SPol	2.09431198315869	0.413854248785975	5.32696294882324e-06	0.000383435147007323	19	82	144	103	8	13	11	20	13	18	34	6	42	70	41	64	Scaffold_2913	871795	872181	gH2A	IPR002119 Histone H2A;IPR032454 Histone H2A, C-terminal domain;IPR009072 Histone-fold;IPR007125 Histone H2A/H2B/H3;IPR032458 Histone H2A conserved site	go_function:GO:0003677 DNA binding;go_component:GO:0000786 nucleosome;go_function:GO:0046982 protein heterodimerization activity	Histone H2A	NA	NA	Adra	Adra-UP g70219 gH2A	Adra-UP g70219
g72840	Adra	SPol	7.22665281926603	-1.24754537695993	5.40649013393155e-06	0.000387870911396559	0	0	32	15	0	0	0	0	0	4	3	0	7	33	30	4	Scaffold_3021	1710287	1710882	NA	NA	-	NA	NA	NA	Adra	Adra-UP g72840	Adra-UP g72840
g46498	Adra	SPol	3.04292140933978	7.26265802819671	6.3547015987827e-06	0.000445569465499113	666	2118	2517	3687	196	1228	1068	856	2548	272	6376	5244	7454	13615	3388	4465	Scaffold_2061	38440	90784	tsp1	IPR000742 EGF-like domain;IPR001007 VWFC domain;IPR001881 EGF-like calcium-binding domain;IPR001791 Laminin G domain;IPR008859 Thrombospondin, C-terminal;IPR024731 EGF domain;IPR003367 Thrombospondin, type 3-like repeat;IPR028974 TSP type-3 repeat;IPR028499 Thrombospondin-1;IPR017897 Thrombospondin, type 3 repeat;IPR013320 Concanavalin A-like lectin/glucanase domain superfamily	go_function:GO:0005515 protein binding;go_function:GO:0005509 calcium ion binding;go_process:GO:0007155 cell adhesion;go_component:GO:0005576 extracellular region;go_process:GO:0016525 negative regulation of angiogenesis;go_component:GO:0005615 extracellular space;go_function:GO:0050840 extracellular matrix binding;go_function:GO:0008201 heparin binding;go_process:GO:0006954 inflammatory response	COMP	NA	NA	Adra	Adra-UP g46498 tsp1	Adra-UP g46498
g16842	Adra	SPol	2.88595023689318	3.67187129386879	6.3833933177231e-06	0.000446137418134802	100	189	474	542	47	35	162	44	66	106	62	60	468	723	407	778	Scaffold_708	1077707	1086850	NA	IPR016186 C-type lectin-like/link domain superfamily;IPR001304 C-type lectin-like;IPR016187 C-type lectin fold	-	NA	NA	NA	Adra	Adra-UP g16842	Adra-UP g16842
g20755	Adra	SPol	2.16917742622696	5.02342834409742	7.32488338660984e-06	0.000496412074683661	259	516	480	872	221	135	258	798	611	346	1017	319	805	886	1831	2053	Scaffold_875	2166658	2175729	NA	IPR018497 Peptidase M13, C-terminal domain;IPR042089 Peptidase M13, domain 2;IPR008753 Peptidase M13, N-terminal domain;IPR024079 Metallopeptidase, catalytic domain superfamily;IPR000718 Peptidase M13	go_process:GO:0006508 proteolysis;go_function:GO:0004222 metalloendopeptidase activity;go_function:GO:0008237 metallopeptidase activity	NA	NA	NA	Adra	Adra-UP g20755	Adra-UP g20755
g37448	Adra	SPol	5.02857696447535	1.17753605044586	7.33185008302278e-06	0.000496412074683661	2	10	5	3	8	1	1	4	17	4	3	3	7	70	218	162	Scaffold_1706	536427	541802	NA	IPR036397 Ribonuclease H superfamily;IPR001584 Integrase, catalytic core;IPR012337 Ribonuclease H-like superfamily	go_function:GO:0003676 nucleic acid binding;go_process:GO:0015074 DNA integration	NA	NA	NA	Adra	Adra-UP g37448	Adra-UP g37448
g58456	Adra	SPol	2.13525312016285	1.81157878636952	7.85103821420081e-06	0.00052500183317554	58	138	204	133	35	39	16	51	238	112	344	28	62	186	113	258	Scaffold_2495	141395	141724	NA	NA	-	NA	NA	NA	Adra	Adra-UP g58456	Adra-UP g58456
g59490	Adra	SPol	2.45459089008749	1.89335238820092	8.86843339587824e-06	0.000571855589152077	106	109	106	134	40	41	7	34	89	94	148	97	98	181	122	266	Scaffold_2527	745720	763056	NA	IPR043128 Reverse transcriptase/Diguanylate cyclase domain;IPR036397 Ribonuclease H superfamily;IPR002156 Ribonuclease H domain;IPR043502 DNA/RNA polymerase superfamily;IPR012337 Ribonuclease H-like superfamily	go_function:GO:0003676 nucleic acid binding;go_function:GO:0004523 RNA-DNA hybrid ribonuclease activity	NA	NA	NA	Adra	Adra-UP g59490	Adra-UP g59490
g12337	Adra	SPol	2.56222763776812	3.72177622810824	9.18532922455301e-06	0.000588785038399898	19	123	310	486	93	76	147	57	251	345	375	198	233	1263	355	685	Scaffold_556	1568486	1589296	NA	NA	-	NA	NA	NA	Adra	Adra-UP g12337	Adra-UP g12337
g57762	Adra	SPol	3.04502829159358	0.660541626914261	9.599521859011e-06	0.000609921526678394	7	24	35	30	11	5	1	22	19	33	34	16	35	62	85	106	Scaffold_2461	537441	538331	NA	IPR000477 Reverse transcriptase domain;IPR015095 Alkylated DNA repair protein AlkB, homologue 8, N-terminal;IPR043502 DNA/RNA polymerase superfamily	go_function:GO:0016706 2-oxoglutarate-dependent dioxygenase activity;go_function:GO:0008168 methyltransferase activity	NA	NA	NA	Adra	Adra-UP g57762	Adra-UP g57762
g15358	Adra	SPol	10.1537535763535	1.44845693836395	1.01521992824598e-05	0.000639411481551672	0	178	234	0	0	0	0	0	0	243	248	196	104	199	0	286	Scaffold_645	54306	57596	NA	IPR019761 DNA-directed RNA polymerase M, 15kDa subunit, conserved site	-	NA	NA	NA	Adra	Adra-UP g15358	Adra-UP g15358
g68007	Adra	SPol	2.16048113215171	2.42003938642081	1.04675895904174e-05	0.000649830361220586	14	113	122	122	27	52	48	84	84	11	64	89	81	387	274	203	Scaffold_2823	30430	33347	NA	IPR003599 Immunoglobulin subtype;IPR013783 Immunoglobulin-like fold;IPR013106 Immunoglobulin V-set domain;IPR007110 Immunoglobulin-like domain;IPR036179 Immunoglobulin-like domain superfamily	-	NA	NA	NA	Adra	Adra-UP g68007	Adra-UP g68007
g35708	Adra	SPol	4.8709743007972	3.37468014556888	1.08880611090921e-05	0.000670172534061334	0	8	13	42	18	21	14	18	27	10	7	104	5	587	957	635	Scaffold_1620	3636610	3690764	NA	IPR002172 Low-density lipoprotein (LDL) receptor class A repeat;IPR000998 MAM domain;IPR036055 LDL receptor-like superfamily;IPR000742 EGF-like domain;IPR023415 Low-density lipoprotein (LDL) receptor class A, conserved site;IPR013320 Concanavalin A-like lectin/glucanase domain superfamily	go_function:GO:0005515 protein binding;go_component:GO:0016020 membrane	NA	NA	NA	Adra	Adra-UP g35708	Adra-UP g35708
g23461	Adra	SPol	3.53391865588511	0.789920980744045	1.29047455563057e-05	0.000780989433583576	16	30	55	53	7	0	9	13	17	20	39	18	28	70	100	132	Scaffold_1051	376516	382500	NA	IPR015095 Alkylated DNA repair protein AlkB, homologue 8, N-terminal;IPR000477 Reverse transcriptase domain;IPR043502 DNA/RNA polymerase superfamily	go_function:GO:0016706 2-oxoglutarate-dependent dioxygenase activity;go_function:GO:0008168 methyltransferase activity	NA	NA	NA	Adra	Adra-UP g23461	Adra-UP g23461
g48687	Adra	SPol	2.78745660000474	0.247593217380543	1.32625049524058e-05	0.000800405103896447	32	55	224	114	9	4	6	12	36	8	0	5	62	46	20	73	Scaffold_2131	14572	26321	NA	IPR001627 Sema domain;IPR015943 WD40/YVTN repeat-like-containing domain superfamily;IPR031148 Plexin family;IPR043502 DNA/RNA polymerase superfamily;IPR036352 Sema domain superfamily	go_function:GO:0005515 protein binding;go_function:GO:0017154 semaphorin receptor activity;go_process:GO:0071526 semaphorin-plexin signaling pathway	NA	NA	NA	Adra	Adra-UP g48687	Adra-UP g48687
g17357	Adra	SPol	2.9150500321008	3.39803385583358	1.33916950992191e-05	0.000805956850054668	24	388	108	368	64	73	37	96	6	16	9	49	642	681	61	529	Scaffold_716	3410603	3432647	NA	IPR006703 AIG1-type guanine nucleotide-binding (G) domain;IPR027417 P-loop containing nucleoside triphosphate hydrolase	go_function:GO:0005525 GTP binding	NA	NA	NA	Adra	Adra-UP g17357	Adra-UP g17357
g13145	Adra	SPol	2.39606588801038	0.588328660907247	1.47603007581327e-05	0.000880982579134166	3	2	24	17	12	4	9	28	51	31	66	38	51	98	40	69	Scaffold_568	3463562	3465058	FIB3	IPR002126 Cadherin-like;IPR032455 Cadherin, cytoplasmic C-terminal domain;IPR020894 Cadherin conserved site;IPR015919 Cadherin-like superfamily	go_function:GO:0005509 calcium ion binding;go_process:GO:0007156 homophilic cell adhesion via plasma membrane adhesion molecules;go_component:GO:0016020 membrane;go_process:GO:0007155 cell adhesion;go_component:GO:0005886 plasma membrane	PCDH-beta-18	NA	NA	Adra	Adra-UP g13145 FIB3	Adra-UP g13145
g13647	Adra	SPol	3.00529137454566	5.43800190241911	1.53431243433029e-05	0.000905787825673026	355	583	383	665	156	80	370	439	732	538	1399	594	1185	1640	4166	781	Scaffold_605	3666646	3698270	ANK	IPR002110 Ankyrin repeat;IPR000488 Death domain;IPR000906 ZU5 domain;IPR036770 Ankyrin repeat-containing domain superfamily;IPR040745 Ankyrin, UPA domain;IPR020683 Ankyrin repeat-containing domain;IPR011029 Death-like domain superfamily	go_function:GO:0005515 protein binding;go_process:GO:0007165 signal transduction	ANK-3	NA	NA	Adra	Adra-UP g13647 ANK	Adra-UP g13647
g61520	Adra	SPol	-13.1098927055044	4.36792989184345	3.63320496770686e-83	7.87170188303368e-79	0	0	0	0	1069	674	1061	1729	0	0	372	266	0	0	0	0	Scaffold_2589	129297	141595	NA	IPR003597 Immunoglobulin C1-set;IPR037055 MHC class I-like antigen recognition-like superfamily;IPR011161 MHC class I-like antigen recognition-like;IPR013783 Immunoglobulin-like fold;IPR007110 Immunoglobulin-like domain;IPR011162 MHC classes I/II-like antigen recognition protein;IPR036179 Immunoglobulin-like domain superfamily	-	NA	NA	NA	SPol	SPol-UP g61520	SPol-UP g61520
g14360	Adra	SPol	-12.1581767937187	3.42106886970885	2.05222980030314e-75	2.2231805426684e-71	267	611	825	701	582	552	423	748	616	691	808	539	0	0	0	0	Scaffold_625	2344466	2348305	NA	IPR033214 A-kinase-interacting protein 1	go_process:GO:1901222 regulation of NIK/NF-kappaB signaling	NA	NA	NA	SPol	SPol-UP g14360	SPol-UP g14360
g10729	Adra	SPol	-13.7355110997775	4.99193550887099	2.04877836789553e-40	1.47962773729415e-36	165	927	1669	1049	2493	1604	424	2739	0	0	0	0	0	0	0	0	Scaffold_461	78458	105936	DCTD	IPR002125 Cytidine and deoxycytidylate deaminase domain;IPR015517 Deoxycytidylate deaminase-related;IPR016192 APOBEC/CMP deaminase, zinc-binding;IPR035105 Deoxycytidylate deaminase domain;IPR016193 Cytidine deaminase-like	go_function:GO:0016787 hydrolase activity;go_function:GO:0008270 zinc ion binding;go_function:GO:0003824 catalytic activity	dCMP deaminase	NA	NA	SPol	SPol-UP g10729 DCTD	SPol-UP g10729
g61150	Adra	SPol	-9.92647770680986	1.2276473604166	3.20811628700688e-23	8.68838093428638e-20	61	83	154	87	128	81	67	253	0	1	0	0	0	0	0	0	Scaffold_2572	616246	617205	NA	IPR043636 L1 transposable element, RRM domain;IPR004244 Transposase, L1	-	NA	NA	NA	SPol	SPol-UP g61150	SPol-UP g61150
g63311	Adra	SPol	-9.64057867443665	0.951628125213764	7.01500127614157e-22	1.40967323249984e-18	67	95	195	116	105	67	59	199	0	1	0	0	0	0	0	0	Scaffold_2647	129804	130808	NA	IPR043636 L1 transposable element, RRM domain;IPR004244 Transposase, L1	-	NA	NA	NA	SPol	SPol-UP g63311	SPol-UP g63311
g46238	Adra	SPol	-9.66751891124905	0.977632607602196	7.15702278108474e-22	1.40967323249984e-18	68	98	196	118	107	67	60	205	0	1	0	0	0	0	0	0	Scaffold_2052	924648	925652	NA	IPR043636 L1 transposable element, RRM domain;IPR004244 Transposase, L1	-	NA	NA	NA	SPol	SPol-UP g46238	SPol-UP g46238
g61511	Adra	SPol	-9.86472626047142	1.1654140929567	1.16609741195019e-21	2.10538887727607e-18	0	0	0	0	186	80	77	125	0	0	42	31	0	0	0	0	Scaffold_2589	74242	81543	NA	NA	-	NA	NA	NA	SPol	SPol-UP g61511	SPol-UP g61511
g31829	Adra	SPol	-9.60958120820214	0.922015051029936	2.02603924520798e-21	3.37662817589817e-18	68	92	184	110	100	64	59	199	0	1	0	0	0	0	0	0	Scaffold_1412	2844153	2845157	NA	IPR043636 L1 transposable element, RRM domain;IPR004244 Transposase, L1	-	NA	NA	NA	SPol	SPol-UP g31829	SPol-UP g31829
g51708	Adra	SPol	-9.60862575971913	0.921162114543084	2.60516312648476e-21	4.03167602131563e-18	65	90	184	109	101	64	58	199	0	1	0	0	0	0	0	0	Scaffold_2255	163466	164470	NA	IPR043636 L1 transposable element, RRM domain;IPR004244 Transposase, L1	-	NA	NA	NA	SPol	SPol-UP g51708	SPol-UP g51708
g8903	Adra	SPol	-9.59978674642971	0.912668223429882	3.51843669135367e-21	5.08202995699124e-18	65	90	167	98	103	62	58	196	0	1	0	0	0	0	0	0	Scaffold_364	2677084	2678088	NA	IPR043636 L1 transposable element, RRM domain;IPR004244 Transposase, L1	-	NA	NA	NA	SPol	SPol-UP g8903	SPol-UP g8903
g68164	Adra	SPol	-5.00384031107695	1.80611188791648	5.61799700302762e-18	7.15997194515273e-15	1	0	3	0	183	206	149	147	23	34	18	5	6	8	5	2	Scaffold_2825	657626	679406	FHOD3	IPR041387 FHOD1, N-terminal GTPase-binding domain;IPR003653 Ulp1 protease family, C-terminal catalytic domain;IPR011989 Armadillo-like helical;IPR039598 HMG domain-containing protein 3;IPR003034 SAP domain;IPR038765 Papain-like cysteine peptidase superfamily	go_process:GO:0006508 proteolysis;go_function:GO:0008234 cysteine-type peptidase activity	FH1/FH2 domain-containing protein 3	NA	NA	SPol	SPol-UP g68164 FHOD3	SPol-UP g68164
g53000	Adra	SPol	-7.23566488772361	1.75611787129423	1.05201519412515e-16	1.2662756219953e-13	110	0	93	258	277	89	123	236	217	157	544	387	0	0	4	0	Scaffold_2301	6919	18128	NA	IPR001660 Sterile alpha motif domain;IPR011990 Tetratricopeptide-like helical domain superfamily;IPR013761 Sterile alpha motif/pointed domain superfamily	go_function:GO:0005515 protein binding	NA	NA	NA	SPol	SPol-UP g53000	SPol-UP g53000
g44061	Adra	SPol	-11.0077782168453	2.28063660131969	4.93724097348308e-16	5.34851314657422e-13	3	4	2	2	462	73	301	134	0	0	0	1	0	0	0	0	Scaffold_1965	146340	147008	NA	NA	-	NA	NA	NA	SPol	SPol-UP g44061	SPol-UP g44061
g51103	Adra	SPol	-4.52463581749089	1.80183356728597	5.95804050060964e-16	6.14699549934326e-13	1	0	7	0	181	207	143	145	25	37	18	8	5	15	6	4	Scaffold_2230	862518	907140	DUTT1	IPR003598 Immunoglobulin subtype 2;IPR003599 Immunoglobulin subtype;IPR013783 Immunoglobulin-like fold;IPR003653 Ulp1 protease family, C-terminal catalytic domain;IPR013098 Immunoglobulin I-set;IPR039598 HMG domain-containing protein 3;IPR007110 Immunoglobulin-like domain;IPR003034 SAP domain;IPR036179 Immunoglobulin-like domain superfamily;IPR038765 Papain-like cysteine peptidase superfamily	go_process:GO:0006508 proteolysis;go_function:GO:0008234 cysteine-type peptidase activity	Roundabout homolog 1	NA	NA	SPol	SPol-UP g51103 DUTT1	SPol-UP g51103
g23943	Adra	SPol	-5.7137409392031	1.48859263318649	9.84647899120481e-14	8.20514668551705e-11	0	0	2	4	177	166	117	84	3	29	8	0	4	4	2	0	Scaffold_1073	5200885	5207971	NA	IPR003653 Ulp1 protease family, C-terminal catalytic domain;IPR039598 HMG domain-containing protein 3;IPR003034 SAP domain;IPR038765 Papain-like cysteine peptidase superfamily	go_process:GO:0006508 proteolysis;go_function:GO:0008234 cysteine-type peptidase activity	NA	NA	NA	SPol	SPol-UP g23943	SPol-UP g23943
g49266	Adra	SPol	-7.21807192376311	5.41646390978884	1.32914889486093e-13	1.02847642700204e-10	206	1060	749	24	6117	634	1365	628	56	77	114	33	9	26	13	13	Scaffold_2163	134160	143506	NA	NA	-	NA	NA	NA	SPol	SPol-UP g49266	SPol-UP g49266
g41708	Adra	SPol	-8.96795072795462	0.3036408020064	2.84941712537235e-13	1.99146682059088e-10	0	0	0	118	82	29	76	53	134	96	87	67	0	0	0	0	Scaffold_1888	50288	51280	NA	NA	-	NA	NA	NA	SPol	SPol-UP g41708	SPol-UP g41708
g32533	Adra	SPol	-8.41725606897156	-0.206078126271662	4.23499751942054e-13	2.86735800799267e-10	31	58	40	127	63	34	33	37	15	17	10	22	0	0	0	0	Scaffold_1437	587116	595882	FTHFD	NA	-	10-FTHFDH	NA	NA	SPol	SPol-UP g32533 FTHFD	SPol-UP g32533
g57785	Adra	SPol	-8.59578669697071	-0.0356745152475383	1.46045788988508e-12	9.30655313007358e-10	0	0	3	4	65	52	16	67	0	0	0	0	0	0	0	0	Scaffold_2461	989808	990779	NA	IPR004244 Transposase, L1	-	NA	NA	NA	SPol	SPol-UP g57785	SPol-UP g57785
g12137	Adra	SPol	-2.27602984369265	3.74850732972376	2.71794725892869e-12	1.63575125866525e-09	301	1361	1065	451	660	690	420	553	302	1109	447	262	83	184	101	122	Scaffold_537	15197	27470	NA	IPR003599 Immunoglobulin subtype;IPR013106 Immunoglobulin V-set domain;IPR013783 Immunoglobulin-like fold;IPR007110 Immunoglobulin-like domain;IPR036179 Immunoglobulin-like domain superfamily	-	NA	NA	NA	SPol	SPol-UP g12137	SPol-UP g12137
g48281	Adra	SPol	-8.36131639568042	-0.259279057137372	4.20904335901071e-12	2.46467928152232e-09	44	29	52	76	51	50	27	30	47	31	46	16	0	0	0	0	Scaffold_2121	450665	462737	NA	NA	-	NA	NA	NA	SPol	SPol-UP g48281	SPol-UP g48281
g9957	Adra	SPol	-3.10098177891194	5.40813806035072	6.00368474723622e-12	3.42304825614789e-09	64	1977	307	446	2858	1550	646	3804	1859	1040	2222	12	108	370	209	284	Scaffold_421	364284	368142	NA	IPR001089 CXC chemokine;IPR001811 Chemokine interleukin-8-like domain;IPR036048 Chemokine interleukin-8-like superfamily	go_component:GO:0005576 extracellular region;go_process:GO:0006955 immune response;go_function:GO:0008009 chemokine activity	NA	NA	NA	SPol	SPol-UP g9957	SPol-UP g9957
g30909	Adra	SPol	-7.88934505438718	-0.673937568138113	7.15744336239628e-12	3.9762350740943e-09	0	0	0	0	22	25	21	57	94	61	75	92	0	0	0	0	Scaffold_1374	877694	893810	NA	NA	-	NA	NA	NA	SPol	SPol-UP g30909	SPol-UP g30909
g3941	Adra	SPol	-9.15181058466186	5.83615650195557	4.55523121457888e-11	2.14551390206665e-08	4	414	2056	388	152	5452	4204	674	220	36	7	13	7	6	2	5	Scaffold_170	88579	89246	NA	IPR009803 Protein of unknown function DUF1373	-	NA	NA	NA	SPol	SPol-UP g3941	SPol-UP g3941
g70914	Adra	SPol	-7.20832985872209	6.198983466004	5.55273411486156e-11	2.55969228367214e-08	6	2806	3902	923	392	5949	6019	1094	484	44	8	11	23	24	13	44	Scaffold_2938	54873	56030	NA	NA	-	NA	NA	NA	SPol	SPol-UP g70914	SPol-UP g70914
g40972	Adra	SPol	-8.31165233398162	-0.285131737578694	8.42942228974553e-11	3.7271808842781e-08	0	0	0	0	34	26	16	104	925	58	29	24	0	0	0	0	Scaffold_1871	40373	40812	NA	IPR013106 Immunoglobulin V-set domain;IPR013783 Immunoglobulin-like fold;IPR007110 Immunoglobulin-like domain;IPR036179 Immunoglobulin-like domain superfamily	-	NA	NA	NA	SPol	SPol-UP g40972	SPol-UP g40972
g6913	Adra	SPol	-7.60176005593166	-0.935273910609913	1.32318351587173e-10	5.48226865956609e-08	0	22	33	42	26	21	24	23	26	38	26	17	0	0	0	0	Scaffold_290	294697	299313	NA	IPR002492 Transposase, Tc1-like;IPR036397 Ribonuclease H superfamily;IPR038717 Tc1-like transposase, DDE domain	go_function:GO:0003677 DNA binding;go_process:GO:0015074 DNA integration;go_process:GO:0006313 transposition, DNA-mediated;go_function:GO:0003676 nucleic acid binding	NA	NA	NA	SPol	SPol-UP g6913	SPol-UP g6913
g37185	Adra	SPol	-7.92327383811663	6.36647598498793	1.34108852098681e-10	5.48226865956609e-08	4	2678	3190	529	275	7752	6118	956	292	50	7	13	11	19	26	14	Scaffold_1682	770661	771409	NA	IPR009803 Protein of unknown function DUF1373	-	NA	NA	NA	SPol	SPol-UP g37185	SPol-UP g37185
g66914	Adra	SPol	-5.78599035510284	-0.432584463412456	1.6080625764478e-10	6.45190440394777e-08	23	0	102	29	38	37	29	34	0	0	94	38	0	0	2	0	Scaffold_2782	22805	23587	NA	NA	-	NA	NA	NA	SPol	SPol-UP g66914	SPol-UP g66914
g46427	Adra	SPol	-4.34788850889776	0.205971207731666	1.92438603187314e-10	7.45911671462618e-08	1	0	2	0	45	59	57	52	11	10	7	0	3	3	3	1	Scaffold_2059	839418	897025	NA	IPR003653 Ulp1 protease family, C-terminal catalytic domain;IPR000477 Reverse transcriptase domain;IPR038765 Papain-like cysteine peptidase superfamily	go_process:GO:0006508 proteolysis;go_function:GO:0008234 cysteine-type peptidase activity	NA	NA	NA	SPol	SPol-UP g46427	SPol-UP g46427
g52248	Adra	SPol	-6.31873805340159	1.26163385238667	1.92795410329118e-10	7.45911671462618e-08	0	22	29	11	125	181	69	104	0	291	0	0	0	6	0	0	Scaffold_2272	1015621	1059079	NA	IPR002999 Tudor domain;IPR035437 SNase-like, OB-fold superfamily;IPR039117 RING finger protein 17	-	NA	NA	NA	SPol	SPol-UP g52248	SPol-UP g52248
g32928	Adra	SPol	-2.76277093250641	3.10293837115448	4.03745859920334e-10	1.43402586902196e-07	197	170	50	778	296	545	363	299	365	579	861	478	43	77	65	44	Scaffold_1472	199817	237230	NA	IPR008166 Glycosyltransferase family 92	-	NA	NA	NA	SPol	SPol-UP g32928	SPol-UP g32928
g48374	Adra	SPol	-8.12170504568613	5.22540427581905	4.630757954351e-10	1.6182258361124e-07	0	427	1089	140	99	3566	2763	405	134	7	0	3	4	6	7	11	Scaffold_2123	703	1374	NA	IPR009803 Protein of unknown function DUF1373	-	NA	NA	NA	SPol	SPol-UP g48374	SPol-UP g48374
g11911	Adra	SPol	-8.00165202701846	5.23775022958708	5.01761423651484e-10	1.72558142933858e-07	0	375	1033	135	98	3574	2798	424	138	7	0	3	7	6	6	11	Scaffold_507	34169	34840	NA	IPR009803 Protein of unknown function DUF1373	-	NA	NA	NA	SPol	SPol-UP g11911	SPol-UP g11911
g62654	Adra	SPol	-6.24593796391068	-0.724379325804194	5.19278761630571e-10	1.75792088273249e-07	0	0	2	0	36	24	26	24	10	0	0	0	0	1	0	0	Scaffold_2621	1496003	1527884	NA	IPR006580 Zinc finger, TTF-type;IPR025398 Domain of unknown function DUF4371	-	NA	NA	NA	SPol	SPol-UP g62654	SPol-UP g62654
g51151	Adra	SPol	-2.20242410506052	2.52828841061728	5.31516926962268e-10	1.77166857531762e-07	17	68	133	78	290	195	180	368	49	95	165	149	57	67	33	54	Scaffold_2236	47620	49788	NA	IPR006703 AIG1-type guanine nucleotide-binding (G) domain;IPR027417 P-loop containing nucleoside triphosphate hydrolase	go_function:GO:0005525 GTP binding	NA	NA	NA	SPol	SPol-UP g51151	SPol-UP g51151
g25155	Adra	SPol	-2.00839727902206	4.01707998687749	5.49778493399198e-10	1.79562336113142e-07	115	295	1112	399	962	581	572	578	51	139	193	59	139	199	132	207	Scaffold_1126	2568270	2573878	NA	IPR006571 TLDc domain;IPR002492 Transposase, Tc1-like;IPR036397 Ribonuclease H superfamily;IPR006073 GTP binding domain;IPR027417 P-loop containing nucleoside triphosphate hydrolase	go_function:GO:0003677 DNA binding;go_process:GO:0015074 DNA integration;go_process:GO:0006313 transposition, DNA-mediated;go_function:GO:0003676 nucleic acid binding;go_function:GO:0005525 GTP binding	NA	NA	NA	SPol	SPol-UP g25155	SPol-UP g25155
g53572	Adra	SPol	-2.98042384513873	1.3314709580396	5.55279078721523e-10	1.79562336113142e-07	7	9	28	28	110	77	65	259	54	67	177	72	13	15	12	17	Scaffold_2327	140607	141380	NA	NA	NA	NA	NA	NA	SPol	SPol-UP g53572	SPol-UP g53572
g27701	Adra	SPol	-3.95539597513793	4.45173551311856	6.41874528591225e-10	2.04512552006728e-07	553	1435	1771	2746	2193	974	271	1030	272	613	982	343	35	68	47	139	Scaffold_1269	136586	138531	NA	NA	-	NA	NA	NA	SPol	SPol-UP g27701	SPol-UP g27701
g32925	Adra	SPol	-2.89442243972113	3.10210996848312	6.90761045658933e-10	2.16898968336905e-07	47	102	99	137	613	415	132	496	622	1503	815	419	44	43	50	73	Scaffold_1472	174556	186432	NA	IPR008166 Glycosyltransferase family 92	-	NA	NA	NA	SPol	SPol-UP g32925	SPol-UP g32925
g63356	Adra	SPol	-8.20787725422746	6.9107002997702	7.38048279914957e-10	2.28436486180535e-07	12	3743	5166	578	308	13572	7209	979	319	56	14	16	15	27	13	32	Scaffold_2650	230718	234634	NA	NA	-	NA	NA	NA	SPol	SPol-UP g63356	SPol-UP g63356
g59903	Adra	SPol	-9.803409958792	1.10874919775814	7.77573399668515e-10	2.37280356017156e-07	8	27	126	0	9	84	121	266	7	19	21	44	0	0	0	0	Scaffold_2534	1670046	1689087	NA	IPR013783 Immunoglobulin-like fold;IPR007110 Immunoglobulin-like domain;IPR036179 Immunoglobulin-like domain superfamily	-	NA	NA	NA	SPol	SPol-UP g59903	SPol-UP g59903
g17343	Adra	SPol	-9.21620595564066	0.552644066160722	9.90416276312438e-10	2.877928155975e-07	0	9	0	0	41	102	10	179	8	0	15	10	0	0	0	0	Scaffold_716	3348139	3350470	NA	IPR036691 Endonuclease/exonuclease/phosphatase superfamily;IPR006703 AIG1-type guanine nucleotide-binding (G) domain;IPR027417 P-loop containing nucleoside triphosphate hydrolase	go_function:GO:0005525 GTP binding	NA	NA	NA	SPol	SPol-UP g17343	SPol-UP g17343
g48441	Adra	SPol	-8.74651088499252	6.25305376374584	1.00466343103224e-09	2.877928155975e-07	5	1720	1900	258	171	9155	4106	619	183	22	21	6	4	16	5	14	Scaffold_2123	904312	904989	NA	IPR009803 Protein of unknown function DUF1373	-	NA	NA	NA	SPol	SPol-UP g48441	SPol-UP g48441
g41390	Adra	SPol	-8.32892928663151	5.18892349297032	1.00951970762531e-09	2.877928155975e-07	4	749	1464	223	88	3448	2786	292	83	12	8	0	3	8	5	8	Scaffold_1879	6694449	6695182	NA	NA	-	NA	NA	NA	SPol	SPol-UP g41390	SPol-UP g41390
g37189	Adra	SPol	-8.35766464883639	5.64902975856766	1.07167144309726e-09	2.98055512295079e-07	0	1071	1203	195	124	5916	2780	406	153	24	14	11	4	10	10	8	Scaffold_1682	807952	808645	NA	IPR009803 Protein of unknown function DUF1373	-	NA	NA	NA	SPol	SPol-UP g37189	SPol-UP g37189
g11909	Adra	SPol	-8.33087467702295	5.09001421931966	1.073032860658e-09	2.98055512295079e-07	1	814	1118	172	84	3534	2276	348	120	24	3	5	5	8	2	7	Scaffold_507	24264	24913	NA	IPR009803 Protein of unknown function DUF1373	-	NA	NA	NA	SPol	SPol-UP g11909	SPol-UP g11909
g3940	Adra	SPol	-8.22759942214484	5.37398292702782	1.20333962815134e-09	3.30019701057304e-07	0	596	1050	205	108	3892	3103	482	159	28	4	6	9	8	2	9	Scaffold_170	82116	82765	NA	IPR009803 Protein of unknown function DUF1373	-	NA	NA	NA	SPol	SPol-UP g3940	SPol-UP g3940
g3937	Adra	SPol	-8.30998429790992	5.41228307126141	1.27537215520501e-09	3.45402663933397e-07	0	646	1160	208	109	4051	3154	471	162	32	4	5	9	7	2	9	Scaffold_170	42176	42825	NA	IPR009803 Protein of unknown function DUF1373	-	NA	NA	NA	SPol	SPol-UP g3937	SPol-UP g3937
g3944	Adra	SPol	-7.81259592292498	5.66167375559747	1.30276866956156e-09	3.48466493761985e-07	5	1476	1854	254	133	5672	3010	486	162	45	11	11	7	16	9	16	Scaffold_170	110337	111006	NA	IPR009803 Protein of unknown function DUF1373	-	NA	NA	NA	SPol	SPol-UP g3944	SPol-UP g3944
g60910	Adra	SPol	-8.07570866829836	6.4150960229661	1.45206914253866e-09	3.77965522591087e-07	0	3266	4629	442	222	8389	6081	933	359	48	11	10	20	11	7	26	Scaffold_2564	713118	716554	NA	NA	-	NA	NA	NA	SPol	SPol-UP g60910	SPol-UP g60910
g48376	Adra	SPol	-8.30895518578533	5.12346769556088	1.46466427864369e-09	3.77965522591087e-07	1	836	1115	176	83	3634	2317	355	124	26	3	5	5	9	2	7	Scaffold_2123	10630	11279	NA	IPR009803 Protein of unknown function DUF1373	-	NA	NA	NA	SPol	SPol-UP g48376	SPol-UP g48376
g52003	Adra	SPol	-4.28210802422658	1.35890007672979	1.4691939794493e-09	3.77965522591087e-07	15	246	237	124	220	155	39	85	52	168	311	116	6	7	5	7	Scaffold_2264	123501	136212	NA	NA	-	NA	NA	NA	SPol	SPol-UP g52003	SPol-UP g52003
g60493	Adra	SPol	-8.7491667119346	0.0894276301093798	1.605585158023e-09	4.04495442252632e-07	47	65	268	302	24	83	62	24	72	0	52	49	0	0	0	0	Scaffold_2553	34779	36462	NA	IPR003598 Immunoglobulin subtype 2;IPR013106 Immunoglobulin V-set domain;IPR003599 Immunoglobulin subtype;IPR013783 Immunoglobulin-like fold;IPR007110 Immunoglobulin-like domain;IPR036179 Immunoglobulin-like domain superfamily	-	NA	NA	NA	SPol	SPol-UP g60493	SPol-UP g60493
g51149	Adra	SPol	-2.36227168996152	3.03245348660615	1.75842796992068e-09	4.37909199957487e-07	32	86	173	142	410	303	166	689	26	118	390	276	60	56	86	68	Scaffold_2236	25912	31117	NA	IPR006703 AIG1-type guanine nucleotide-binding (G) domain;IPR027417 P-loop containing nucleoside triphosphate hydrolase	go_function:GO:0005525 GTP binding	NA	NA	NA	SPol	SPol-UP g51149	SPol-UP g51149
g9204	Adra	SPol	-7.91177641394798	6.32831695667825	1.85598729499269e-09	4.56952508333086e-07	5	1966	3315	407	206	9444	4465	646	186	21	0	9	14	19	12	25	Scaffold_385	1577845	1580832	ZP1	IPR000519 P-type trefoil domain;IPR001507 Zona pellucida domain;IPR042235 Zona pellucida, ZP-C domain;IPR017977 Zona pellucida domain, conserved site;IPR017957 P-type trefoil, conserved site	-	Processed zona pellucida sperm-binding protein 4	NA	NA	SPol	SPol-UP g9204 ZP1	SPol-UP g9204
g11908	Adra	SPol	-8.26371492063366	4.12872676174157	1.90917485964489e-09	4.64766095607484e-07	2	300	645	114	68	1359	1502	273	76	14	0	2	2	6	0	4	Scaffold_507	18055	18726	NA	IPR009803 Protein of unknown function DUF1373	-	NA	NA	NA	SPol	SPol-UP g11908	SPol-UP g11908
g32205	Adra	SPol	-7.57168427938673	6.49901886381008	2.08842784581957e-09	4.97229425357437e-07	0	2258	2725	818	318	11251	4211	1046	318	50	17	6	9	25	20	50	Scaffold_1421	588733	594859	NA	NA	-	NA	NA	NA	SPol	SPol-UP g32205	SPol-UP g32205
g48377	Adra	SPol	-8.32248234560634	4.18687237345233	2.12792019133667e-09	5.01125205059786e-07	3	412	732	125	68	1447	1543	275	81	13	0	2	2	6	0	4	Scaffold_2123	16817	17488	NA	IPR009803 Protein of unknown function DUF1373	-	NA	NA	NA	SPol	SPol-UP g48377	SPol-UP g48377
g3932	Adra	SPol	-7.85503410004563	5.23907315897488	2.16276599496614e-09	5.03854710182112e-07	4	223	1210	140	90	4698	1803	418	103	20	6	5	9	9	6	9	Scaffold_170	4871	5509	NA	IPR009803 Protein of unknown function DUF1373	-	NA	NA	NA	SPol	SPol-UP g3932	SPol-UP g3932
g37847	Adra	SPol	-5.43602121079301	-0.779819915715382	3.63637970027852e-09	8.03936761084024e-07	0	0	3	2	17	25	30	34	0	0	0	2	0	1	0	1	Scaffold_1720	34767	35138	NA	NA	-	NA	NA	NA	SPol	SPol-UP g37847	SPol-UP g37847
g13046	Adra	SPol	-3.08450772759003	1.37051351523587	5.73717106379153e-09	1.23070839869413e-06	34	86	169	92	88	79	92	264	46	38	24	190	7	27	13	10	Scaffold_568	2249691	2259737	CALP	IPR002048 EF-hand domain;IPR028846 Recoverin family;IPR018247 EF-Hand 1, calcium-binding site;IPR011992 EF-hand domain pair	go_function:GO:0005509 calcium ion binding	KChIP4	NA	NA	SPol	SPol-UP g13046 CALP	SPol-UP g13046
g50839	Adra	SPol	-7.87955597683901	6.81186440312116	7.12179129050273e-09	1.49806534077701e-06	0	2816	4479	486	282	13864	5717	796	310	62	20	24	17	33	12	41	Scaffold_2217	367666	371690	NA	IPR001507 Zona pellucida domain;IPR042235 Zona pellucida, ZP-C domain	-	NA	NA	NA	SPol	SPol-UP g50839	SPol-UP g50839
g55691	Adra	SPol	-5.91990564050466	0.881369285165796	7.43751156678376e-09	1.53467738672321e-06	0	24	14	54	99	35	86	176	68	100	59	48	0	6	0	0	Scaffold_2391	939575	947411	NA	IPR024518 Domain of unknown function DUF3421	-	Natterin-3	NA	NA	SPol	SPol-UP g55691	SPol-UP g55691
g47247	Adra	SPol	-3.25651482950057	2.04604657587409	8.25716781270034e-09	1.68768620137536e-06	214	263	520	208	204	187	132	284	148	211	178	108	31	20	5	21	Scaffold_2077	1161299	1161793	NA	NA	NA	NA	NA	NA	SPol	SPol-UP g47247	SPol-UP g47247
g52131	Adra	SPol	-8.63864054015789	5.92516157108384	8.33482985078758e-09	1.68768620137536e-06	0	1411	1454	372	133	8213	2495	404	192	14	10	3	6	5	4	17	Scaffold_2269	62090	63237	NA	NA	-	NA	NA	NA	SPol	SPol-UP g52131	SPol-UP g52131
g48384	Adra	SPol	-8.40899654536449	6.04253206415387	9.02102482733787e-09	1.80971781397317e-06	7	3270	2881	193	107	6292	5036	515	140	21	0	11	3	15	6	19	Scaffold_2123	49084	49712	NA	IPR009803 Protein of unknown function DUF1373	-	NA	NA	NA	SPol	SPol-UP g48384	SPol-UP g48384
g32684	Adra	SPol	-4.35354824412854	-0.662742891343644	1.22247962729185e-08	2.40784032771866e-06	0	0	5	0	29	24	28	32	0	1	0	0	2	2	0	1	Scaffold_1455	108380	109051	NA	IPR004244 Transposase, L1	-	NA	NA	NA	SPol	SPol-UP g32684	SPol-UP g32684
g44529	Adra	SPol	-7.51236304739032	5.5482606165885	1.34529832978905e-08	2.62587690209096e-06	0	1794	1724	152	87	5524	2562	428	142	16	4	5	12	13	14	13	Scaffold_1984	1540	2237	NA	IPR009803 Protein of unknown function DUF1373	-	NA	NA	NA	SPol	SPol-UP g44529	SPol-UP g44529
g41061	Adra	SPol	-3.65205170506986	1.75507007945168	1.48218184548146e-08	2.86722784501797e-06	634	713	274	2953	335	130	53	145	554	353	477	482	7	20	12	13	Scaffold_1873	269341	273806	SIAT4	IPR038578 GT29-like superfamiliy;IPR001675 Glycosyl transferase family 29	go_function:GO:0008373 sialyltransferase activity;go_process:GO:0006486 protein glycosylation	Gal-NAc6S	NA	NA	SPol	SPol-UP g41061 SIAT4	SPol-UP g41061
g38223	Adra	SPol	-5.52953449298257	-0.263750596487313	1.75019648697806e-08	3.35573071565192e-06	0	5	37	15	45	55	30	21	32	31	29	54	0	2	1	0	Scaffold_1749	65609	72368	NA	NA	-	NA	NA	NA	SPol	SPol-UP g38223	SPol-UP g38223
g51266	Adra	SPol	-7.57134806087327	0.554382476463405	2.06102036949822e-08	3.85832652023004e-06	24	0	24	16	126	71	65	12	212	151	5	19	1	0	0	0	Scaffold_2240	5549	11461	NA	IPR043128 Reverse transcriptase/Diguanylate cyclase domain;IPR040676 Domain of unknown function DUF5641;IPR008042 Retrotransposon, Pao;IPR005312 Protein of unknown function DUF1759;IPR000477 Reverse transcriptase domain;IPR036397 Ribonuclease H superfamily;IPR041588 Integrase zinc-binding domain;IPR001584 Integrase, catalytic core;IPR012337 Ribonuclease H-like superfamily;IPR043502 DNA/RNA polyme…	go_function:GO:0003676 nucleic acid binding;go_process:GO:0015074 DNA integration	NA	NA	NA	SPol	SPol-UP g51266	SPol-UP g51266
g67409	Adra	SPol	-7.73895183126971	5.87800728112659	2.06575222166844e-08	3.85832652023004e-06	6	1454	2196	247	104	6979	3160	614	174	19	10	0	4	15	14	27	Scaffold_2805	843957	845054	NA	NA	-	NA	NA	NA	SPol	SPol-UP g67409	SPol-UP g67409
g48286	Adra	SPol	-2.30154401979532	3.41434623723515	2.14870285043239e-08	3.94823899705484e-06	446	377	978	1347	473	529	416	394	1140	910	1230	541	79	69	134	80	Scaffold_2121	496167	502480	BTF2	IPR003879 Butyrophylin-like, SPRY domain;IPR003877 SPRY domain;IPR000315 B-box-type zinc finger;IPR006574 SPRY-associated;IPR001841 Zinc finger, RING-type;IPR003613 U box domain;IPR043136 B30.2/SPRY domain superfamily;IPR013083 Zinc finger, RING/FYVE/PHD-type;IPR018957 Zinc finger, C3HC4 RING-type;IPR017907 Zinc finger, RING-type, conserved site;IPR001870 B30.2/SPRY domain;IPR013320 Concanavalin …	go_function:GO:0005515 protein binding;go_function:GO:0008270 zinc ion binding;go_function:GO:0004842 ubiquitin-protein transferase activity;go_process:GO:0016567 protein ubiquitination;go_function:GO:0046872 metal ion binding	BT	NA	NA	SPol	SPol-UP g48286 BTF2	SPol-UP g48286
g60911	Adra	SPol	-8.34329765136354	4.70015961679223	2.15033786417646e-08	3.94823899705484e-06	0	1051	1229	131	72	2482	1886	331	84	25	5	5	3	5	0	9	Scaffold_2564	718446	718901	NA	NA	-	NA	NA	NA	SPol	SPol-UP g60911	SPol-UP g60911
g19088	Adra	SPol	-8.73303701984575	6.18697352544206	2.24698248293193e-08	4.09101869539523e-06	0	1041	1693	244	145	9675	3236	348	121	17	10	6	2	12	6	18	Scaffold_787	4346205	4347131	Nqo2	IPR029039 Flavoprotein-like superfamily;IPR003680 Flavodoxin-like fold	-	Ribosyldihydronicotinamide dehydrogenase [quinone]	NA	NA	SPol	SPol-UP g19088 Nqo2	SPol-UP g19088
g4750	Adra	SPol	-8.27462963295434	6.46082097802444	2.32519693204458e-08	4.1981430608065e-06	11	2759	3370	248	125	9988	5430	499	229	44	7	11	15	8	15	19	Scaffold_203	3116017	3117273	DIA4	IPR029039 Flavoprotein-like superfamily;IPR003680 Flavodoxin-like fold	-	Azoreductase	NA	NA	SPol	SPol-UP g4750 DIA4	SPol-UP g4750
g26973	Adra	SPol	-2.30795170186932	3.67466497458408	2.60226003572082e-08	4.65955090363035e-06	259	246	761	311	363	470	486	1059	844	1012	1068	408	148	114	62	106	Scaffold_1207	39075	48170	NA	IPR001611 Leucine-rich repeat;IPR032675 Leucine-rich repeat domain superfamily	go_function:GO:0005515 protein binding	NA	NA	NA	SPol	SPol-UP g26973	SPol-UP g26973
g17231	Adra	SPol	-2.20491401918136	2.88306001155953	3.04393693689367e-08	5.23412203767763e-06	144	527	996	216	518	281	199	271	146	207	326	168	50	81	70	73	Scaffold_716	1186947	1195650	NA	IPR001811 Chemokine interleukin-8-like domain;IPR039809 Chemokine beta/gamma/delta;IPR036048 Chemokine interleukin-8-like superfamily	go_component:GO:0005576 extracellular region;go_process:GO:0006955 immune response;go_function:GO:0008009 chemokine activity	NA	NA	NA	SPol	SPol-UP g17231	SPol-UP g17231
g53004	Adra	SPol	-8.35625188861414	6.65484175795173	4.00691011314486e-08	6.62700110774019e-06	0	2695	4365	422	284	12311	5223	731	256	43	11	27	15	4	6	39	Scaffold_2301	46080	48250	NA	IPR001507 Zona pellucida domain;IPR042235 Zona pellucida, ZP-C domain;IPR040196 Zona pellucida sperm-binding protein 3	go_process:GO:0035803 egg coat formation;go_function:GO:0035804 structural constituent of egg coat;go_process:GO:0007339 binding of sperm to zona pellucida	NA	NA	NA	SPol	SPol-UP g53004	SPol-UP g53004
g52739	Adra	SPol	-10.2769142143704	4.88132676702872	4.19213931300132e-08	6.72791780411012e-06	0	1299	1316	185	90	2144	2754	359	118	25	3	5	0	5	0	0	Scaffold_2292	871155	871878	NA	IPR009803 Protein of unknown function DUF1373	-	NA	NA	NA	SPol	SPol-UP g52739	SPol-UP g52739
g32532	Adra	SPol	-5.63678383066949	0.962248314721901	4.55516363695337e-08	7.15160691001679e-06	90	128	191	196	93	85	103	105	39	43	28	40	0	8	0	0	Scaffold_1437	580498	586785	NA	IPR041373 Reverse transcriptase, RNase H-like domain;IPR041588 Integrase zinc-binding domain;IPR043502 DNA/RNA polymerase superfamily	-	NA	NA	NA	SPol	SPol-UP g32532	SPol-UP g32532
g70680	Adra	SPol	-6.44466327176305	7.29396350927229	4.83805086072913e-08	7.43412836514592e-06	31	3011	5631	1056	448	18275	8511	1520	587	248	77	85	78	129	78	90	Scaffold_2930	1379810	1388810	NA	IPR001507 Zona pellucida domain	-	NA	NA	NA	SPol	SPol-UP g70680	SPol-UP g70680
g62787	Adra	SPol	-11.1890971845901	2.45665248472746	5.25231588311157e-08	7.95780950513953e-06	0	149	222	14	16	700	250	43	0	10	0	0	0	0	0	0	Scaffold_2626	170029	181705	CGA1	IPR001019 Guanine nucleotide binding protein (G-protein), alpha subunit;IPR000469 G-protein alpha subunit, group 12/13;IPR011025 G protein alpha subunit, helical insertion;IPR027417 P-loop containing nucleoside triphosphate hydrolase	go_process:GO:0007186 G protein-coupled receptor signaling pathway;go_function:GO:0019001 guanyl nucleotide binding;go_function:GO:0031683 G-protein beta/gamma-subunit complex binding;go_function:GO:0003924 GTPase activity;go_process:GO:0007266 Rho protein signal transduction;go_function:GO:0001664 G protein-coupled receptor binding;go_process:GO:0007165 signal transduction	Adenylate cyclase-inhibiting G alpha protein	NA	NA	SPol	SPol-UP g62787 CGA1	SPol-UP g62787
g42709	Adra	SPol	-6.77184063423039	6.95445376164412	5.50914214368282e-08	8.28896345034944e-06	35	3620	4766	667	280	14370	6962	1081	351	78	29	25	48	54	53	80	Scaffold_1906	6176395	6186236	NA	IPR001507 Zona pellucida domain;IPR042235 Zona pellucida, ZP-C domain	-	NA	NA	NA	SPol	SPol-UP g42709	SPol-UP g42709
g68181	Adra	SPol	-2.24692527612657	1.21463989705296	7.21747326269817e-08	1.06015046728138e-05	0	33	29	47	106	114	64	114	43	9	21	27	15	29	16	23	Scaffold_2825	1101486	1103031	FKBP14	IPR036397 Ribonuclease H superfamily;IPR002048 EF-hand domain;IPR018247 EF-Hand 1, calcium-binding site;IPR011992 EF-hand domain pair	go_function:GO:0003676 nucleic acid binding;go_function:GO:0005509 calcium ion binding	FK506-binding protein 14	NA	NA	SPol	SPol-UP g68181 FKBP14	SPol-UP g68181
g14180	Adra	SPol	-8.21896403272907	6.50782959550683	7.24186601853797e-08	1.06015046728138e-05	11	1611	5263	318	6757	7171	3196	485	243	364	43	72	0	3	26	37	Scaffold_622	2412286	2418883	NA	IPR023796 Serpin domain;IPR042178 Serpin superfamily, domain 1;IPR042185 Serpin superfamily, domain 2;IPR000215 Serpin family;IPR023795 Serpin, conserved site;IPR036186 Serpin superfamily	go_function:GO:0004867 serine-type endopeptidase inhibitor activity;go_component:GO:0005615 extracellular space	NA	NA	NA	SPol	SPol-UP g14180	SPol-UP g14180
g54674	Adra	SPol	-4.17396376035818	1.10043705211853	7.81266408264948e-08	1.11361302641239e-05	11	29	13	24	111	126	66	116	132	180	154	56	6	14	0	3	Scaffold_2355	82608	90093	NA	NA	-	NA	NA	NA	SPol	SPol-UP g54674	SPol-UP g54674
g5346	Adra	SPol	-7.97959659122055	-0.577216529594325	7.98942063640541e-08	1.12401810070363e-05	0	0	0	0	13	11	24	98	0	0	0	0	0	0	0	0	Scaffold_231	941193	942131	NA	IPR042566 L1 transposable element, C-terminal domain;IPR004244 Transposase, L1	-	NA	NA	NA	SPol	SPol-UP g5346	SPol-UP g5346
g54141	Adra	SPol	-12.3464947539479	3.60569448549054	8.1626290987951e-08	1.13366360291343e-05	0	276	470	47	10	1421	712	81	20	3	0	3	0	0	0	0	Scaffold_2339	636859	637291	hh2b	IPR000558 Histone H2B;IPR009072 Histone-fold;IPR007125 Histone H2A/H2B/H3	go_function:GO:0003677 DNA binding;go_component:GO:0000786 nucleosome;go_function:GO:0046982 protein heterodimerization activity	Histone H2B	NA	NA	SPol	SPol-UP g54141 hh2b	SPol-UP g54141
g34056	Adra	SPol	-7.97810090018532	-0.578261496978421	8.70870256366654e-08	1.17990845022288e-05	0	0	0	0	14	10	24	98	1	0	0	0	0	0	0	0	Scaffold_1530	261974	262912	NA	IPR042566 L1 transposable element, C-terminal domain;IPR004244 Transposase, L1	-	NA	NA	NA	SPol	SPol-UP g34056	SPol-UP g34056
g47301	Adra	SPol	-7.97810090018532	-0.578261496978421	8.70870256366654e-08	1.17990845022288e-05	0	0	0	0	14	10	24	98	0	0	0	0	0	0	0	0	Scaffold_2081	395463	396401	NA	IPR042566 L1 transposable element, C-terminal domain;IPR004244 Transposase, L1	-	NA	NA	NA	SPol	SPol-UP g47301	SPol-UP g47301
g70506	Adra	SPol	-2.89286613797439	1.09540348702509	8.71343819974435e-08	1.17990845022288e-05	11	7	77	25	107	122	44	124	24	23	63	42	8	22	6	17	Scaffold_2924	14272	22507	NA	IPR006612 THAP-type zinc finger;IPR038441 THAP-type zinc finger superfamily	-	NA	NA	NA	SPol	SPol-UP g70506	SPol-UP g70506
g63964	Adra	SPol	-7.46605088998793	-1.06030246009291	8.77034811280271e-08	1.18023827460859e-05	0	0	0	0	31	22	20	9	0	0	4	0	0	0	0	0	Scaffold_2670	1251105	1253235	al	IPR003025 Transcription factor Otx;IPR001356 Homeobox domain;IPR013851 Transcription factor Otx, C-terminal;IPR017970 Homeobox, conserved site;IPR009057 Homeobox-like domain superfamily	go_process:GO:0007275 multicellular organism development;go_function:GO:0003700 DNA-binding transcription factor activity;go_function:GO:0003677 DNA binding;go_component:GO:0005634 nucleus;go_process:GO:0006355 regulation of transcription, DNA-templated;go_function:GO:0000981 DNA-binding transcription factor activity, RNA polymerase II-specific	Homeobox protein orthopedia	NA	NA	SPol	SPol-UP g63964 al	SPol-UP g63964
g2359	Adra	SPol	-9.0923525452579	4.38053870630899	9.54092762183736e-08	1.26818244082655e-05	2	873	848	60	23	2177	1447	130	80	16	0	3	0	4	2	2	Scaffold_113	921008	921820	DIA4	IPR029039 Flavoprotein-like superfamily;IPR003680 Flavodoxin-like fold	-	Azoreductase	NA	NA	SPol	SPol-UP g2359 DIA4	SPol-UP g2359
g57162	Adra	SPol	-9.11116386690351	4.08711367668686	1.1434840382139e-07	1.49245332361098e-05	0	383	400	40	43	2121	821	160	35	9	4	9	0	0	3	3	Scaffold_2436	1453591	1454670	NA	IPR019188 Small nuclear RNA activating complex (SNAPc), subunit SNAP43	-	NA	NA	NA	SPol	SPol-UP g57162	SPol-UP g57162
g41387	Adra	SPol	-7.42722383216661	5.01920488207373	1.18413016126078e-07	1.52710500439738e-05	7	699	804	147	64	3650	1970	220	100	25	0	8	4	6	15	14	Scaffold_1879	6671259	6671704	NA	NA	-	NA	NA	NA	SPol	SPol-UP g41387	SPol-UP g41387
g4916	Adra	SPol	-10.3292769724487	1.60888458035951	1.38989707898521e-07	1.76023720480926e-05	0	77	88	54	18	374	143	20	4	0	0	0	0	0	0	0	Scaffold_216	429875	437978	NA	IPR001507 Zona pellucida domain;IPR036397 Ribonuclease H superfamily;IPR002492 Transposase, Tc1-like;IPR042235 Zona pellucida, ZP-C domain;IPR040196 Zona pellucida sperm-binding protein 3	go_function:GO:0003676 nucleic acid binding;go_function:GO:0003677 DNA binding;go_process:GO:0015074 DNA integration;go_process:GO:0006313 transposition, DNA-mediated;go_process:GO:0035803 egg coat formation;go_function:GO:0035804 structural constituent of egg coat;go_process:GO:0007339 binding of sperm to zona pellucida	NA	NA	NA	SPol	SPol-UP g4916	SPol-UP g4916
g48250	Adra	SPol	-6.63696640886858	-0.322020760716772	1.39740053183418e-07	1.76023720480926e-05	22	0	10	9	57	40	36	10	179	76	2	7	1	0	0	0	Scaffold_2121	163366	169278	NA	IPR041588 Integrase zinc-binding domain;IPR008042 Retrotransposon, Pao;IPR000477 Reverse transcriptase domain;IPR005312 Protein of unknown function DUF1759;IPR040676 Domain of unknown function DUF5641;IPR036397 Ribonuclease H superfamily;IPR043128 Reverse transcriptase/Diguanylate cyclase domain;IPR001584 Integrase, catalytic core;IPR012337 Ribonuclease H-like superfamily;IPR043502 DNA/RNA polyme…	go_function:GO:0003676 nucleic acid binding;go_process:GO:0015074 DNA integration	NA	NA	NA	SPol	SPol-UP g48250	SPol-UP g48250
g44356	Adra	SPol	-7.13866595870043	4.76139270142399	1.47171685980384e-07	1.83254123474195e-05	8	737	1549	130	52	2405	2144	327	85	24	13	13	3	5	11	22	Scaffold_1970	603708	604340	cldn7	IPR004031 PMP-22/EMP/MP20/Claudin superfamily;IPR006187 Claudin;IPR017974 Claudin, conserved site	go_component:GO:0016021 integral component of membrane;go_component:GO:0005923 bicellular tight junction;go_function:GO:0005198 structural molecule activity	Claudin-3	Claudin-1	hyperosmotic salinity response	SPol	SPol-UP g44356 cldn7	SPol-UP g44356 Claudin-1
g24137	Adra	SPol	-8.78791441487337	6.06574656153689	1.73941205200961e-07	2.11719671454159e-05	0	2138	2834	240	120	7833	3885	417	171	18	7	9	0	15	8	11	Scaffold_1083	3320	10265	DIA4	IPR003680 Flavodoxin-like fold;IPR029039 Flavoprotein-like superfamily	-	Azoreductase	NA	NA	SPol	SPol-UP g24137 DIA4	SPol-UP g24137
g3943	Adra	SPol	-8.74743707005688	4.75478120498035	1.77055835977652e-07	2.14306801245353e-05	3	995	984	67	47	3377	1357	181	36	16	12	9	3	0	5	4	Scaffold_170	99011	106590	NA	IPR009803 Protein of unknown function DUF1373	-	NA	NA	NA	SPol	SPol-UP g3943	SPol-UP g3943
g28187	Adra	SPol	-4.19543804297869	-0.603913260042751	1.9135650206714e-07	2.30329442988147e-05	0	0	9	2	23	25	30	42	36	18	53	11	0	3	3	0	Scaffold_1282	424783	430532	NA	NA	-	NA	NA	NA	SPol	SPol-UP g28187	SPol-UP g28187
g4751	Adra	SPol	-8.3493938916293	5.29421707153723	2.19490956340274e-07	2.58450601090673e-05	0	1644	1047	130	34	4783	2151	190	110	12	0	0	7	3	4	10	Scaffold_203	3125318	3126548	DIA4	IPR003680 Flavodoxin-like fold;IPR029039 Flavoprotein-like superfamily	-	Azoreductase	NA	NA	SPol	SPol-UP g4751 DIA4	SPol-UP g4751
g4752	Adra	SPol	-7.20244647464687	6.00724425847391	2.38907438490467e-07	2.76800457878848e-05	64	1402	1890	209	112	8114	3211	295	117	61	47	72	18	21	23	28	Scaffold_203	3128934	3134364	DIA4	IPR029039 Flavoprotein-like superfamily;IPR003680 Flavodoxin-like fold	-	Azoreductase	NA	NA	SPol	SPol-UP g4752 DIA4	SPol-UP g4752
g59292	Adra	SPol	-5.66056729068416	1.15867646321613	2.45121474324542e-07	2.82489460782741e-05	6	4	14	12	113	132	17	236	113	41	95	107	4	4	0	0	Scaffold_2521	1516781	1537337	NA	IPR040676 Domain of unknown function DUF5641;IPR008042 Retrotransposon, Pao;IPR041588 Integrase zinc-binding domain;IPR036397 Ribonuclease H superfamily;IPR001584 Integrase, catalytic core;IPR012337 Ribonuclease H-like superfamily;IPR043502 DNA/RNA polymerase superfamily	go_function:GO:0003676 nucleic acid binding;go_process:GO:0015074 DNA integration	NA	NA	NA	SPol	SPol-UP g59292	SPol-UP g59292
g37186	Adra	SPol	-8.71190854127307	5.81167208936719	2.54159380896563e-07	2.89539667242242e-05	0	1553	1505	236	106	6695	3058	494	142	25	14	5	3	12	0	15	Scaffold_1682	773793	774541	NA	IPR009803 Protein of unknown function DUF1373	-	NA	NA	NA	SPol	SPol-UP g37186	SPol-UP g37186
g63886	Adra	SPol	-7.78958385149052	5.11298970955756	2.5475205093577e-07	2.89539667242242e-05	5	1226	1667	96	35	3925	2130	198	76	15	9	5	10	5	5	11	Scaffold_2670	98218	98634	h2ax	IPR002119 Histone H2A;IPR007125 Histone H2A/H2B/H3;IPR009072 Histone-fold;IPR032454 Histone H2A, C-terminal domain	go_function:GO:0003677 DNA binding;go_component:GO:0000786 nucleosome;go_function:GO:0046982 protein heterodimerization activity	Histone H2A	NA	NA	SPol	SPol-UP g63886 h2ax	SPol-UP g63886
g50552	Adra	SPol	-8.49239427088662	6.29910424984363	2.55248206606056e-07	2.89539667242242e-05	10	2056	2855	346	155	8358	5240	623	183	32	0	7	0	15	12	22	Scaffold_2204	2185	3360	DIA4	IPR003680 Flavodoxin-like fold;IPR029039 Flavoprotein-like superfamily	-	Azoreductase	NA	NA	SPol	SPol-UP g50552 DIA4	SPol-UP g50552
g71967	Adra	SPol	-7.97904390522765	3.73350518318859	2.5916984373405e-07	2.92456970538642e-05	8	645	871	85	34	1934	392	121	27	11	4	0	0	4	4	3	Scaffold_2983	2074685	2075821	NA	NA	-	NA	NA	NA	SPol	SPol-UP g71967	SPol-UP g71967
g27093	Adra	SPol	-5.83236617142148	0.712851524133586	2.85634189299794e-07	3.17361556172786e-05	29	197	24	0	78	137	33	76	15	16	10	4	0	0	5	0	Scaffold_1218	441910	445810	NA	NA	NA	NA	NA	NA	SPol	SPol-UP g27093	SPol-UP g27093
g18801	Adra	SPol	-7.05042287211416	0.0665372837724137	3.05182297512503e-07	3.37351002954382e-05	16	0	11	11	81	62	40	8	161	110	5	14	1	0	0	0	Scaffold_774	248696	254608	NA	IPR043128 Reverse transcriptase/Diguanylate cyclase domain;IPR040676 Domain of unknown function DUF5641;IPR008042 Retrotransposon, Pao;IPR005312 Protein of unknown function DUF1759;IPR000477 Reverse transcriptase domain;IPR036397 Ribonuclease H superfamily;IPR041588 Integrase zinc-binding domain;IPR001584 Integrase, catalytic core;IPR012337 Ribonuclease H-like superfamily;IPR043502 DNA/RNA polyme…	go_function:GO:0003676 nucleic acid binding;go_process:GO:0015074 DNA integration	NA	NA	NA	SPol	SPol-UP g18801	SPol-UP g18801
g41394	Adra	SPol	-8.11908033189319	5.31089856934558	3.08197507932494e-07	3.38954680551544e-05	0	1244	1819	238	91	4134	2679	339	118	38	12	8	8	13	0	9	Scaffold_1879	6748628	6756522	NA	NA	-	NA	NA	NA	SPol	SPol-UP g41394	SPol-UP g41394
g62740	Adra	SPol	-8.26426405453352	-0.355549946269879	3.18072038430804e-07	3.48047918416252e-05	15	0	12	7	67	40	28	6	145	71	1	8	0	0	0	0	Scaffold_2624	1010194	1015815	NA	IPR036397 Ribonuclease H superfamily;IPR008042 Retrotransposon, Pao;IPR043128 Reverse transcriptase/Diguanylate cyclase domain;IPR041588 Integrase zinc-binding domain;IPR005312 Protein of unknown function DUF1759;IPR000477 Reverse transcriptase domain;IPR001584 Integrase, catalytic core;IPR012337 Ribonuclease H-like superfamily;IPR043502 DNA/RNA polymerase superfamily	go_function:GO:0003676 nucleic acid binding;go_process:GO:0015074 DNA integration	NA	NA	NA	SPol	SPol-UP g62740	SPol-UP g62740
g52134	Adra	SPol	-7.84056159138435	6.02773547213646	3.3086227404292e-07	3.58423101470695e-05	16	1252	1946	302	101	8785	2746	390	141	57	0	10	19	4	10	23	Scaffold_2269	85865	87040	NA	NA	-	NA	NA	NA	SPol	SPol-UP g52134	SPol-UP g52134
g9790	Adra	SPol	-4.27881622094715	0.400003108815911	3.50738195198974e-07	3.7433959296458e-05	0	2	9	2	30	93	36	102	51	11	77	9	4	0	2	6	Scaffold_411	279154	284082	NA	IPR013106 Immunoglobulin V-set domain;IPR003599 Immunoglobulin subtype;IPR013783 Immunoglobulin-like fold;IPR007110 Immunoglobulin-like domain;IPR036179 Immunoglobulin-like domain superfamily	-	NA	NA	NA	SPol	SPol-UP g9790	SPol-UP g9790
g64342	Adra	SPol	-5.52076105212877	0.923325365728473	3.53007004068891e-07	3.74914203439048e-05	0	11	2	26	21	130	99	126	244	2443	721	927	0	0	2	6	Scaffold_2687	36729	37550	NA	IPR036397 Ribonuclease H superfamily;IPR002156 Ribonuclease H domain	go_function:GO:0003676 nucleic acid binding;go_function:GO:0004523 RNA-DNA hybrid ribonuclease activity	NA	NA	NA	SPol	SPol-UP g64342	SPol-UP g64342
g3938	Adra	SPol	-7.59999579380605	5.61424306783225	3.99980380955537e-07	4.20678394843819e-05	0	1751	1870	148	48	7266	1460	319	60	11	3	5	13	16	8	15	Scaffold_170	47094	57807	NA	IPR009803 Protein of unknown function DUF1373	-	NA	NA	NA	SPol	SPol-UP g3938	SPol-UP g3938
g36257	Adra	SPol	-5.40988655940033	-0.733092942770505	4.02916210802851e-07	4.21718967306984e-05	0	0	0	0	35	43	10	20	7	26	35	0	1	0	1	0	Scaffold_1659	677947	679191	NA	IPR000477 Reverse transcriptase domain	-	NA	NA	NA	SPol	SPol-UP g36257	SPol-UP g36257
g19086	Adra	SPol	-8.78428333180804	5.32253019650398	5.12690501132462e-07	5.23960018751694e-05	0	543	965	138	87	5383	1701	201	59	5	10	4	2	6	0	12	Scaffold_787	4340298	4340927	DIA4	IPR029039 Flavoprotein-like superfamily;IPR003680 Flavodoxin-like fold	-	Azoreductase	NA	NA	SPol	SPol-UP g19086 DIA4	SPol-UP g19086
g67408	Adra	SPol	-8.01218709053419	5.24880147625125	5.26843818644842e-07	5.35896627922964e-05	0	687	1080	164	77	4524	2074	311	96	17	13	7	0	17	8	8	Scaffold_2805	833999	841519	NA	IPR015095 Alkylated DNA repair protein AlkB, homologue 8, N-terminal;IPR000477 Reverse transcriptase domain;IPR043502 DNA/RNA polymerase superfamily	go_function:GO:0016706 2-oxoglutarate-dependent dioxygenase activity;go_function:GO:0008168 methyltransferase activity	NA	NA	NA	SPol	SPol-UP g67408	SPol-UP g67408
g38150	Adra	SPol	-4.33094316390706	1.60756325332682	6.00770239679163e-07	5.94351050816838e-05	6	0	15	16	103	56	277	127	17	22	20	5	9	10	8	1	Scaffold_1743	453831	472896	NA	IPR038765 Papain-like cysteine peptidase superfamily	-	NA	NA	NA	SPol	SPol-UP g38150	SPol-UP g38150
g50840	Adra	SPol	-5.60050037172807	7.60786706847905	6.38417091056488e-07	6.28724758855903e-05	123	4477	7187	1383	659	23403	9682	1733	612	249	295	120	157	261	168	251	Scaffold_2217	373728	393522	TTC32	IPR001507 Zona pellucida domain;IPR019734 Tetratricopeptide repeat;IPR042235 Zona pellucida, ZP-C domain;IPR011990 Tetratricopeptide-like helical domain superfamily;IPR017977 Zona pellucida domain, conserved site;IPR013026 Tetratricopeptide repeat-containing domain	go_function:GO:0005515 protein binding	TPR repeat protein 32	NA	NA	SPol	SPol-UP g50840 TTC32	SPol-UP g50840
g72896	Adra	SPol	-3.8256766445696	4.89842059523049	6.54288012911498e-07	6.41439098992784e-05	91	266	642	170	932	2881	1011	628	655	707	626	568	32	219	39	161	Scaffold_3023	247774	251763	nrdB	IPR012348 Ribonucleotide reductase-like;IPR000358 Ribonucleotide reductase small subunit family;IPR030475 Ribonucleotide reductase small subunit, acitve site;IPR033909 Ribonucleotide reductase small subunit;IPR009078 Ferritin-like superfamily	go_function:GO:0016491 oxidoreductase activity;go_process:GO:0009263 deoxyribonucleotide biosynthetic process	Ribonucleotide reductase small subunit	NA	NA	SPol	SPol-UP g72896 nrdB	SPol-UP g72896
g24135	Adra	SPol	-2.07710024600944	2.26618589746671	7.3474658561436e-07	7.13857377754292e-05	16	21	19	37	164	174	107	456	32	30	52	76	31	67	54	40	Scaffold_1082	30021	43356	NA	IPR001304 C-type lectin-like;IPR016186 C-type lectin-like/link domain superfamily;IPR018378 C-type lectin, conserved site;IPR016187 C-type lectin fold	-	NA	NA	NA	SPol	SPol-UP g24135	SPol-UP g24135
g57562	Adra	SPol	-3.39432811170723	2.20009556405326	7.46215413092734e-07	7.21763533038713e-05	11	75	117	59	147	108	103	684	41	43	158	138	31	14	17	14	Scaffold_2452	1748156	1754291	STC2	IPR004978 Stanniocalcin	go_component:GO:0005576 extracellular region;go_function:GO:0005179 hormone activity	STC-2	NA	NA	SPol	SPol-UP g57562 STC2	SPol-UP g57562
g17342	Adra	SPol	-8.49586202225933	-0.109523282850075	7.92852921655454e-07	7.6008634515872e-05	0	8	3	0	22	52	3	134	10	11	0	5	0	0	0	0	Scaffold_716	3336291	3346895	NA	IPR006703 AIG1-type guanine nucleotide-binding (G) domain;IPR027417 P-loop containing nucleoside triphosphate hydrolase	go_function:GO:0005525 GTP binding	NA	NA	NA	SPol	SPol-UP g17342	SPol-UP g17342
g22273	Adra	SPol	-8.69567527744741	4.7289172432424	8.44811136864906e-07	8.02792898741888e-05	6	623	990	180	78	3025	1530	249	59	17	11	10	0	0	7	6	Scaffold_990	188876	189596	NA	NA	-	NA	NA	NA	SPol	SPol-UP g22273	SPol-UP g22273
g44615	Adra	SPol	-5.0693804423711	1.31327653800424	8.82479813581156e-07	8.34926097862416e-05	44	392	173	88	151	137	108	82	40	122	40	28	0	0	3	12	Scaffold_1990	420609	424573	IRG1	IPR005656 MmgE/PrpD;IPR042188 MmgE/PrpD superfamily, domain 2;IPR042183 MmgE/PrpD superfamily, domain 1;IPR036148 MmgE/PrpD superfamily	go_function:GO:0016829 lyase activity	Aconitate decarboxylase 1	NA	NA	SPol	SPol-UP g44615 IRG1	SPol-UP g44615
g36251	Adra	SPol	-6.29895434565083	5.59884231043388	9.58138366611593e-07	8.87137856880631e-05	21	753	1199	261	134	6374	2059	292	181	45	109	51	19	23	31	56	Scaffold_1659	572118	587093	NA	NA	-	NA	NA	NA	SPol	SPol-UP g36251	SPol-UP g36251
g71332	Adra	SPol	-9.01083424139355	4.97374073845062	1.01422087482401e-06	9.31106333641403e-05	0	682	1197	110	76	3504	1915	272	89	11	4	0	0	0	3	10	Scaffold_2959	1421940	1471856	cpz	IPR000668 Peptidase C1A, papain C-terminal;IPR033157 Cathepsin Z;IPR025661 Cysteine peptidase, asparagine active site;IPR038765 Papain-like cysteine peptidase superfamily	go_process:GO:0006508 proteolysis;go_function:GO:0008234 cysteine-type peptidase activity	Cathepsin Z	Cathepsin Z	angiotensin maturation	SPol	SPol-UP g71332 cpz	SPol-UP g71332 Cathepsin Z
g50121	Adra	SPol	-10.6352520588616	1.90980529636296	1.01999041385584e-06	9.32451996059102e-05	0	40	106	12	12	530	129	16	14	0	0	0	0	0	0	0	Scaffold_2195	806658	820471	NA	IPR015926 Cytolysin/lectin	-	NA	NA	NA	SPol	SPol-UP g50121	SPol-UP g50121
g48383	Adra	SPol	-8.17274193671128	5.61083360123044	1.03095612462548e-06	9.36404706624198e-05	0	923	1369	203	126	4954	3429	385	135	16	0	4	10	0	4	20	Scaffold_2123	41232	41890	NA	IPR009803 Protein of unknown function DUF1373	-	NA	NA	NA	SPol	SPol-UP g48383	SPol-UP g48383
g10750	Adra	SPol	-3.4905603144541	3.53420558989892	1.04872711053333e-06	9.46738399033963e-05	12	14	48	9	208	466	478	1306	236	410	769	314	83	50	34	13	Scaffold_461	247942	265070	NA	NA	-	NA	NA	NA	SPol	SPol-UP g10750	SPol-UP g10750
g64821	Adra	SPol	-4.77216969844321	5.51284479602503	1.14099110208831e-06	0.00010257557351803	33	1453	2141	311	238	4076	3287	491	300	174	166	137	78	82	75	98	Scaffold_2706	656012	712032	kank2	IPR000980 SH2 domain;IPR002110 Ankyrin repeat;IPR032498 PI3K regulatory subunit p85-related , inter-SH2 domain;IPR003119 Saposin A-type domain;IPR036770 Ankyrin repeat-containing domain superfamily;IPR004911 Gamma interferon inducible lysosomal thiol reductase GILT;IPR036860 SH2 domain superfamily;IPR020683 Ankyrin repeat-containing domain;IPR035020 PI3K p85 subunit, C-terminal SH2 domain;IPR0350…	go_function:GO:0005515 protein binding;go_function:GO:0016671 oxidoreductase activity, acting on a sulfur group of donors, disulfide as acceptor	PI3-kinase regulatory subunit alpha	NA	NA	SPol	SPol-UP g64821 kank2	SPol-UP g64821
g71079	Adra	SPol	-7.38067179308983	3.85083832692608	1.18429573190017e-06	0.000106028724493178	0	309	341	69	37	1778	727	97	45	0	0	7	0	8	4	7	Scaffold_2948	2414101	2416706	zar1	IPR027377 Zinc-binding domain;IPR026775 Zygote arrest protein 1	-	Oocyte-specific maternal effect factor	NA	NA	SPol	SPol-UP g71079 zar1	SPol-UP g71079
g53518	Adra	SPol	-7.23168737613989	-1.2245925287332	1.2501654661401e-06	0.000111465370326714	0	0	0	0	14	24	3	41	27	67	27	15	0	0	0	0	Scaffold_2326	883653	885097	NA	NA	-	NA	NA	NA	SPol	SPol-UP g53518	SPol-UP g53518
g66340	Adra	SPol	-9.15275685886179	4.68544803943781	1.31321205524036e-06	0.000115952616234208	0	298	562	226	77	3575	992	97	42	14	0	6	0	4	0	6	Scaffold_2762	153243	164422	Disp	IPR001314 Peptidase S1A, chymotrypsin family;IPR001254 Serine proteases, trypsin domain;IPR043504 Peptidase S1, PA clan, chymotrypsin-like fold;IPR018114 Serine proteases, trypsin family, histidine active site;IPR033116 Serine proteases, trypsin family, serine active site;IPR009003 Peptidase S1, PA clan	go_process:GO:0006508 proteolysis;go_function:GO:0004252 serine-type endopeptidase activity	Plasminogen	NA	NA	SPol	SPol-UP g66340 Disp	SPol-UP g66340
g41389	Adra	SPol	-6.42499282083682	5.72683229155491	1.33394874527445e-06	0.00011700944742962	0	1215	1760	191	145	5652	3349	482	102	22	23	21	30	6	29	59	Scaffold_1879	6679127	6688172	NA	IPR002181 Fibrinogen, alpha/beta/gamma chain, C-terminal globular domain;IPR014716 Fibrinogen, alpha/beta/gamma chain, C-terminal globular, subdomain 1;IPR036056 Fibrinogen-like, C-terminal	-	NA	NA	NA	SPol	SPol-UP g41389	SPol-UP g41389
g69676	Adra	SPol	-7.09988605680405	5.50305224819261	1.36181528773796e-06	0.000118972137194075	9	1189	1729	134	31	5218	2678	333	89	53	20	0	7	34	11	21	Scaffold_2890	344620	346257	NA	IPR005819 Linker histone H1/H5;IPR005818 Linker histone H1/H5, domain H15;IPR036388 Winged helix-like DNA-binding domain superfamily;IPR036390 Winged helix DNA-binding domain superfamily	go_function:GO:0003677 DNA binding;go_component:GO:0000786 nucleosome;go_process:GO:0006334 nucleosome assembly	NA	NA	NA	SPol	SPol-UP g69676	SPol-UP g69676
g57994	Adra	SPol	-8.50249337367301	5.98562059839875	1.54333529551461e-06	0.000133218735110038	5	1778	2315	258	95	6437	4558	391	162	20	15	0	0	5	8	26	Scaffold_2466	1357201	1357825	NA	IPR001507 Zona pellucida domain;IPR040196 Zona pellucida sperm-binding protein 3	go_process:GO:0035803 egg coat formation;go_function:GO:0035804 structural constituent of egg coat;go_process:GO:0007339 binding of sperm to zona pellucida	NA	NA	NA	SPol	SPol-UP g57994	SPol-UP g57994
g57991	Adra	SPol	-7.92046511130978	4.76226506574613	1.62158021551363e-06	0.000139417289481422	0	843	929	71	44	3120	1622	151	46	9	6	0	0	5	9	10	Scaffold_2466	1328306	1334041	NA	IPR001507 Zona pellucida domain;IPR040196 Zona pellucida sperm-binding protein 3	go_process:GO:0035803 egg coat formation;go_function:GO:0035804 structural constituent of egg coat;go_process:GO:0007339 binding of sperm to zona pellucida	NA	NA	NA	SPol	SPol-UP g57991	SPol-UP g57991
g68604	Adra	SPol	-2.79845499684435	1.39436795489914	1.75721261397295e-06	0.000148717845681007	0	37	45	46	154	173	45	99	100	86	91	88	12	28	10	19	Scaffold_2838	1021056	1030781	NA	IPR038717 Tc1-like transposase, DDE domain;IPR029526 PiggyBac transposable element-derived protein;IPR036397 Ribonuclease H superfamily;IPR002492 Transposase, Tc1-like;IPR009057 Homeobox-like domain superfamily	go_function:GO:0003676 nucleic acid binding;go_function:GO:0003677 DNA binding;go_process:GO:0015074 DNA integration;go_process:GO:0006313 transposition, DNA-mediated	NA	NA	NA	SPol	SPol-UP g68604	SPol-UP g68604
g3474	Adra	SPol	-2.6338233636672	2.87733065870648	1.79442272892169e-06	0.000151276120018744	40	129	156	165	348	388	351	148	97	106	81	57	26	50	46	97	Scaffold_155	23425	29403	SKP2	IPR032675 Leucine-rich repeat domain superfamily	-	Cyclin-A/CDK2-associated protein p45	NA	NA	SPol	SPol-UP g3474 SKP2	SPol-UP g3474
g58107	Adra	SPol	-7.61134756123759	4.55667666472118	1.81437954764445e-06	0.000151777402622643	0	682	686	117	54	2574	1456	224	74	23	0	0	2	10	0	15	Scaffold_2470	13150	13843	NA	IPR009803 Protein of unknown function DUF1373	-	NA	NA	NA	SPol	SPol-UP g58107	SPol-UP g58107
g20623	Adra	SPol	-9.90780427932855	4.78267955679348	1.98747053809958e-06	0.000163728276343975	0	264	228	94	54	3440	1366	224	72	0	0	2	0	0	0	6	Scaffold_867	42954	43658	NA	IPR009803 Protein of unknown function DUF1373	-	NA	NA	NA	SPol	SPol-UP g20623	SPol-UP g20623
g41264	Adra	SPol	-3.91113966176532	2.42858830752271	1.99565494661261e-06	0.000163779773004958	36	107	132	44	76	625	141	142	46	47	66	89	9	14	21	26	Scaffold_1879	3782714	3783304	NA	IPR029365 TMEM238 protein	-	NA	NA	NA	SPol	SPol-UP g41264	SPol-UP g41264
g48242	Adra	SPol	-3.13327822224808	1.06373368080878	2.00619691445396e-06	0.000164023631503998	12	71	65	30	80	150	76	59	7	27	67	5	3	20	12	10	Scaffold_2121	85923	87314	NA	IPR027417 P-loop containing nucleoside triphosphate hydrolase	-	NA	NA	NA	SPol	SPol-UP g48242	SPol-UP g48242
g56907	Adra	SPol	-7.86499505949413	6.01480491871131	2.24178624785711e-06	0.00018123336136594	4	1246	1522	283	177	7842	3380	490	175	20	10	12	0	37	6	22	Scaffold_2430	415786	478159	fgf3	IPR002209 Fibroblast growth factor family;IPR000225 Armadillo;IPR011989 Armadillo-like helical;IPR036975 Importin-alpha, importin-beta-binding domain superfamily;IPR032413 Atypical Arm repeat;IPR002652 Importin-alpha, importin-beta-binding domain;IPR016024 Armadillo-type fold;IPR008996 Cytokine IL1/FGF	go_function:GO:0008083 growth factor activity;go_function:GO:0005515 protein binding;go_process:GO:0006606 protein import into nucleus;go_function:GO:0061608 nuclear import signal receptor activity	FGF-9	NA	NA	SPol	SPol-UP g56907 fgf3	SPol-UP g56907
g26441	Adra	SPol	-9.27969058436339	0.588836326658806	2.26325052077584e-06	0.000182288422985611	0	14	15	7	6	177	71	16	2	0	2	0	0	0	0	0	Scaffold_1158	140673	146358	NA	NA	-	NA	NA	NA	SPol	SPol-UP g26441	SPol-UP g26441
g26250	Adra	SPol	-10.1740843186122	1.45464512409365	2.67470453472673e-06	0.000212271606041719	0	99	53	12	6	263	205	12	5	0	0	0	0	0	0	0	Scaffold_1152	3453476	3457355	NA	IPR015926 Cytolysin/lectin;IPR009104 Sea anemone actinoporin-like	go_process:GO:0052331 hemolysis in other organism involved in symbiotic interaction;go_function:GO:0015267 channel activity;go_process:GO:0046931 pore complex assembly;go_component:GO:0046930 pore complex;go_process:GO:0006812 cation transport	NA	NA	NA	SPol	SPol-UP g26250	SPol-UP g26250
g4753	Adra	SPol	-9.48832189363325	5.46295336037737	2.84389869968704e-06	0.00022405785173607	0	767	1417	105	80	5305	2422	287	96	10	5	12	0	2	10	0	Scaffold_203	3136394	3137721	DIA4	IPR003680 Flavodoxin-like fold;IPR029039 Flavoprotein-like superfamily	-	Azoreductase	NA	NA	SPol	SPol-UP g4753 DIA4	SPol-UP g4753
g62729	Adra	SPol	-8.91544381014058	0.249617402551765	3.20625284770441e-06	0.000251690848544796	12	0	0	25	63	141	7	10	14	0	0	26	0	0	0	0	Scaffold_2624	871374	881851	NA	NA	-	NA	NA	NA	SPol	SPol-UP g62729	SPol-UP g62729
g1553	Adra	SPol	-5.73705090153563	3.39447326959521	3.30258522411258e-06	0.000258317008901167	0	96	256	60	32	1067	694	94	40	13	5	0	7	7	5	22	Scaffold_82	690557	693539	NA	IPR002999 Tudor domain;IPR035437 SNase-like, OB-fold superfamily	-	NA	NA	NA	SPol	SPol-UP g1553	SPol-UP g1553
g10606	Adra	SPol	-4.77796059733463	3.41374821912472	3.57926221505545e-06	0.000276958196969255	11	154	239	103	76	1330	381	158	41	32	44	59	14	16	9	41	Scaffold_459	1023581	1028252	bmb	IPR040346 GEX1/Brambleberry	-	Protein brambleberry	NA	NA	SPol	SPol-UP g10606 bmb	SPol-UP g10606
g36802	Adra	SPol	-2.29119685139253	1.91327913685402	3.76255725839821e-06	0.000289816921741037	6	15	97	113	137	266	76	170	120	358	174	24	26	30	31	44	Scaffold_1666	56476	67582	NA	IPR001627 Sema domain;IPR015943 WD40/YVTN repeat-like-containing domain superfamily;IPR031148 Plexin family;IPR043502 DNA/RNA polymerase superfamily;IPR036352 Sema domain superfamily	go_function:GO:0005515 protein binding;go_function:GO:0017154 semaphorin receptor activity;go_process:GO:0071526 semaphorin-plexin signaling pathway	NA	NA	NA	SPol	SPol-UP g36802	SPol-UP g36802
g2400	Adra	SPol	-7.61673972952156	4.00917043306328	3.77219477203786e-06	0.000289816921741037	0	457	711	37	25	2263	592	82	15	0	4	8	0	8	4	6	Scaffold_113	1907449	1909348	gtf3a	IPR013087 Zinc finger C2H2-type;IPR036236 Zinc finger C2H2 superfamily	-	TFIIIA	NA	NA	SPol	SPol-UP g2400 gtf3a	SPol-UP g2400
g15030	Adra	SPol	-5.91369957584843	3.52871847588092	3.78938361202007e-06	0.000290108782113169	0	145	294	96	25	1485	483	121	42	6	7	0	6	20	4	11	Scaffold_640	1676611	1691070	epab	IPR003954 RNA recognition motif domain, eukaryote;IPR000504 RNA recognition motif domain;IPR012677 Nucleotide-binding alpha-beta plait domain superfamily;IPR035979 RNA-binding domain superfamily;IPR036053 PABC (PABP) domain	go_function:GO:0003676 nucleic acid binding;go_function:GO:0003723 RNA binding	PABP	NA	NA	SPol	SPol-UP g15030 epab	SPol-UP g15030
g57383	Adra	SPol	-3.99690944115381	0.0607604518588156	4.05311905967048e-06	0.000305975183089967	18	73	43	31	16	96	36	37	4	9	6	3	1	5	3	3	Scaffold_2440	155705	156712	B3gt5	IPR002659 Glycosyl transferase, family 31;IPR029044 Nucleotide-diphospho-sugar transferases	go_function:GO:0016758 transferase activity, transferring hexosyl groups;go_component:GO:0016020 membrane;go_process:GO:0006486 protein glycosylation	Beta-1,3-GalTase 1	NA	NA	SPol	SPol-UP g57383 B3gt5	SPol-UP g57383
g52741	Adra	SPol	-9.05237554210165	5.293435061158	4.28040824052555e-06	0.000318691838279129	0	1020	594	153	52	4740	2154	237	99	15	8	0	0	9	0	8	Scaffold_2292	877429	882017	NA	IPR009803 Protein of unknown function DUF1373	-	NA	NA	NA	SPol	SPol-UP g52741	SPol-UP g52741
g36383	Adra	SPol	-2.18400111278234	2.52663435655665	4.35541336026103e-06	0.000322062750387084	210	411	1625	783	106	331	249	284	220	164	495	143	38	80	36	67	Scaffold_1663	296849	313020	GALT	IPR003859 Beta-1,4-galactosyltransferase;IPR027791 Galactosyltransferase, C-terminal;IPR027995 Galactosyltransferase, N-terminal;IPR029044 Nucleotide-diphospho-sugar transferases	go_function:GO:0016757 transferase activity, transferring glycosyl groups;go_process:GO:0005975 carbohydrate metabolic process	N-acetyllactosamine synthase	NA	NA	SPol	SPol-UP g36383 GALT	SPol-UP g36383
g20619	Adra	SPol	-7.37158137615279	4.74278982806734	4.39676355977323e-06	0.000324014555394717	6	1059	1397	134	69	2878	1685	269	103	23	4	6	2	17	0	18	Scaffold_867	2511	3198	NA	IPR009803 Protein of unknown function DUF1373	-	NA	NA	NA	SPol	SPol-UP g20619	SPol-UP g20619
g9201	Adra	SPol	-9.57155916839535	3.72769488613646	4.94765638867079e-06	0.000362148389584262	0	137	181	56	30	2050	317	68	30	366	0	11	0	0	3	0	Scaffold_385	1488798	1514838	cip1	IPR004841 Amino acid permease/ SLC12A domain;IPR018491 SLC12A transporter, C-terminal	go_process:GO:0055085 transmembrane transport;go_component:GO:0016020 membrane;go_process:GO:0006811 ion transport;go_function:GO:0022857 transmembrane transporter activity	Solute carrier family 12 member 9	NA	NA	SPol	SPol-UP g9201 cip1	SPol-UP g9201
g68167	Adra	SPol	-6.43682860615236	0.510860360230234	5.22664251149916e-06	0.000378730557371708	0	33	10	8	21	171	40	31	55	19	37	39	0	3	0	0	Scaffold_2825	736774	778513	DNAH9	IPR035699 Dynein heavy chain, hydrolytic ATP-binding dynein motor region;IPR041466 Dynein heavy chain, AAA 5 extension domain;IPR043157 Dynein heavy chain, AAA1 domain, small subdomain;IPR024317 Dynein heavy chain, AAA module D4;IPR043160 Dynein heavy chain, C-terminal domain, barrel region;IPR024743 Dynein heavy chain, coiled coil stalk;IPR042219 Dynein heavy chain AAA lid domain superfamily;IPR…	go_function:GO:0005524 ATP binding;go_function:GO:0008569 ATP-dependent microtubule motor activity, minus-end-directed;go_process:GO:0007018 microtubule-based movement;go_component:GO:0030286 dynein complex	Axonemal beta dynein heavy chain 17	NA	NA	SPol	SPol-UP g68167 DNAH9	SPol-UP g68167
g56323	Adra	SPol	-9.639227778476	0.937649741032394	5.42995343908415e-06	0.000388268551852136	0	0	23	9	7	294	33	18	0	0	13	0	0	0	0	0	Scaffold_2408	1196257	1203768	NA	NA	-	NA	NA	NA	SPol	SPol-UP g56323	SPol-UP g56323
g46202	Adra	SPol	-3.54424857628219	4.28358585112035	5.67404233676701e-06	0.000403637496170658	30	311	520	160	242	2081	791	291	110	45	76	82	69	84	75	91	Scaffold_2052	381750	391819	NA	IPR006861 Hyaluronan/mRNA-binding protein;IPR032381 Intracellular hyaluronan-binding protein 4, N-terminal domain;IPR039764 RNA binding protein HABP4/SERBP1	go_function:GO:0003723 RNA binding	NA	NA	NA	SPol	SPol-UP g46202	SPol-UP g46202
g48670	Adra	SPol	-6.98223306147653	2.30945149829843	6.05087413043055e-06	0.000427030094169082	0	178	185	13	24	526	306	40	10	0	0	0	0	5	3	0	Scaffold_2129	943525	978896	NA	IPR011598 Myc-type, basic helix-loop-helix (bHLH) domain;IPR036638 Helix-loop-helix DNA-binding domain superfamily	go_function:GO:0046983 protein dimerization activity	NA	NA	NA	SPol	SPol-UP g48670	SPol-UP g48670
g28324	Adra	SPol	-5.4164529332724	4.23249461776498	6.21811525078758e-06	0.000437408068258324	56	500	683	255	63	2350	820	189	62	27	11	18	13	35	7	40	Scaffold_1286	779208	814795	tsc	IPR002948 Thiazide-sensitive Na-K-Cl co-transporter;IPR013612 Amino acid permease, N-terminal;IPR004841 Amino acid permease/ SLC12A domain;IPR018491 SLC12A transporter, C-terminal	go_process:GO:0006811 ion transport;go_component:GO:0016020 membrane;go_process:GO:0055085 transmembrane transport;go_function:GO:0022857 transmembrane transporter activity	Bumetanide-sensitive sodium-(potassium)-chloride cotransporter 2	Bumetanide-sensitive sodium-(potassium)-chloride cotransporter 2	cellular hyperosmotic salinity response; potassium, sodium and chloride transmembrane ion transport; cellular ion homeostasis; cell volume homeostasis; hyperosmotic response	SPol	SPol-UP g28324 tsc	SPol-UP g28324 Bumetanide-sensitive sodium-(potassium)-chloride cotransporter 2
g48613	Adra	SPol	-6.97189002208332	5.76098069412238	6.73690495954054e-06	0.000464846442208298	14	556	817	195	43	7235	2340	326	400	24	60	246	31	13	6	36	Scaffold_2129	216608	224201	NA	IPR002172 Low-density lipoprotein (LDL) receptor class A repeat;IPR000742 EGF-like domain;IPR000033 LDLR class B repeat;IPR001881 EGF-like calcium-binding domain;IPR036055 LDL receptor-like superfamily;IPR011042 Six-bladed beta-propeller, TolB-like;IPR023415 Low-density lipoprotein (LDL) receptor class A, conserved site;IPR018097 EGF-like calcium-binding, conserved site;IPR000152 EGF-type asparta…	go_function:GO:0005515 protein binding;go_function:GO:0005509 calcium ion binding	NA	NA	NA	SPol	SPol-UP g48613	SPol-UP g48613
g26866	Adra	SPol	-7.60246870655058	4.85347625237353	7.08112918207322e-06	0.000485505521705058	8	250	487	244	63	4508	664	133	43	17	6	7	0	10	8	15	Scaffold_1199	13862	22657	NA	IPR001507 Zona pellucida domain	-	NA	NA	NA	SPol	SPol-UP g26866	SPol-UP g26866
g19087	Adra	SPol	-8.32666926039371	2.9626825397193	7.23094286024544e-06	0.00049421327447974	0	123	136	25	7	913	452	41	18	5	0	0	0	2	0	3	Scaffold_787	4341018	4341224	NA	NA	NA	NA	NA	NA	SPol	SPol-UP g19087	SPol-UP g19087
g59824	Adra	SPol	-2.54507114637501	1.7228310395126	7.3094955233174e-06	0.000496412074683661	44	367	326	40	219	146	97	115	61	85	68	57	9	33	14	49	Scaffold_2534	194834	197269	NA	IPR001811 Chemokine interleukin-8-like domain;IPR036048 Chemokine interleukin-8-like superfamily	go_component:GO:0005576 extracellular region;go_process:GO:0006955 immune response;go_function:GO:0008009 chemokine activity	NA	NA	NA	SPol	SPol-UP g59824	SPol-UP g59824
g10290	Adra	SPol	-9.64876729036649	0.946099922164998	7.46655260193235e-06	0.000502504610206991	0	32	47	25	4	280	50	18	8	3	6	0	0	0	0	0	Scaffold_442	2391123	2392766	NA	IPR011598 Myc-type, basic helix-loop-helix (bHLH) domain;IPR036638 Helix-loop-helix DNA-binding domain superfamily	go_function:GO:0046983 protein dimerization activity	NA	NA	NA	SPol	SPol-UP g10290	SPol-UP g10290
g52288	Adra	SPol	-2.69051484906653	6.32066190176777	7.62355356623222e-06	0.000511368147263118	275	1447	1907	1485	1908	7611	2372	1686	1059	1018	1025	717	345	864	464	649	Scaffold_2275	347286	351111	clb1	IPR013763 Cyclin-like;IPR004367 Cyclin, C-terminal domain;IPR039361 Cyclin;IPR006671 Cyclin, N-terminal;IPR036915 Cyclin-like superfamily	-	G2/mitotic-specific cyclin-B2	NA	NA	SPol	SPol-UP g52288 clb1	SPol-UP g52288
g68242	Adra	SPol	-9.85102866359635	4.15861466839281	7.94863489674068e-06	0.00052989268822395	0	696	925	46	22	1975	1164	72	28	7	16	4	3	0	0	0	Scaffold_2825	2034229	2035021	fabp3	IPR000463 Cytosolic fatty-acid binding;IPR012674 Calycin;IPR000566 Lipocalin/cytosolic fatty-acid binding domain;IPR031259 Intracellular lipid binding protein	go_function:GO:0008289 lipid binding	Fatty acid-binding protein 3	NA	NA	SPol	SPol-UP g68242 fabp3	SPol-UP g68242
g70065	Adra	SPol	-8.39891543951281	3.70470399997195	8.24498082476546e-06	0.000547962437268001	0	120	246	68	63	2118	206	41	18	18	0	0	0	5	3	0	Scaffold_2905	1814512	1816595	NA	IPR001356 Homeobox domain;IPR009057 Homeobox-like domain superfamily	go_function:GO:0003677 DNA binding	NA	NA	NA	SPol	SPol-UP g70065	SPol-UP g70065
g34773	Adra	SPol	-6.18392907007937	2.7674332783615	8.58472045551298e-06	0.00056102737854146	4	53	111	37	16	972	214	41	9	4	0	0	2	6	7	4	Scaffold_1579	225869	226885	mos	IPR000719 Protein kinase domain;IPR008271 Serine/threonine-protein kinase, active site;IPR017441 Protein kinase, ATP binding site;IPR011009 Protein kinase-like domain superfamily	go_function:GO:0004672 protein kinase activity;go_process:GO:0006468 protein phosphorylation;go_function:GO:0005524 ATP binding	Oocyte maturation factor mos	NA	NA	SPol	SPol-UP g34773 mos	SPol-UP g34773
g32550	Adra	SPol	-4.82720275296039	1.19231528286304	8.59693019827217e-06	0.00056102737854146	0	6	30	846	77	53	133	214	38	42	28	0	9	5	0	0	Scaffold_1439	161816	195124	CTRB	IPR001314 Peptidase S1A, chymotrypsin family;IPR001254 Serine proteases, trypsin domain;IPR043504 Peptidase S1, PA clan, chymotrypsin-like fold;IPR018114 Serine proteases, trypsin family, histidine active site;IPR033116 Serine proteases, trypsin family, serine active site;IPR009003 Peptidase S1, PA clan	go_process:GO:0006508 proteolysis;go_function:GO:0004252 serine-type endopeptidase activity	Plasminogen	NA	NA	SPol	SPol-UP g32550 CTRB	SPol-UP g32550
g70414	Adra	SPol	-8.61764444303959	3.50021110727457	8.66798148825289e-06	0.00056328416327832	0	244	300	91	34	1406	551	93	22	0	3	0	0	0	0	6	Scaffold_2920	839684	842756	NA	NA	-	NA	NA	NA	SPol	SPol-UP g70414	SPol-UP g70414
g32204	Adra	SPol	-11.6182322586035	2.8823383758787	8.82449460001942e-06	0.000570720895534391	0	72	147	56	13	1270	76	10	12	6	5	0	0	0	0	0	Scaffold_1421	585895	586377	NA	NA	-	NA	NA	NA	SPol	SPol-UP g32204	SPol-UP g32204
g2127	Adra	SPol	-5.41016332439232	4.74541245929327	9.25058755266205e-06	0.000591218967303764	12	718	725	109	65	2929	1592	236	105	30	13	19	21	15	29	65	Scaffold_102	290645	295460	NA	IPR004279 Perilipin	-	NA	NA	NA	SPol	SPol-UP g2127	SPol-UP g2127
g39187	Adra	SPol	-3.23108505589122	0.318037129114864	9.96413246483801e-06	0.000631236532114563	8	110	81	118	100	61	16	52	29	38	68	39	3	6	4	11	Scaffold_1790	268396	272109	NA	IPR009079 Four-helical cytokine-like, core	-	NA	NA	NA	SPol	SPol-UP g39187	SPol-UP g39187
g57521	Adra	SPol	-7.81594686913708	-0.773088482895795	1.00861413761385e-05	0.000637103029316086	0	17	15	0	6	52	33	7	0	0	0	0	0	0	0	0	Scaffold_2452	822110	830739	NA	NA	-	NA	NA	NA	SPol	SPol-UP g57521	SPol-UP g57521
g8078	Adra	SPol	-5.16205691081773	1.76570014630328	1.02642160759084e-05	0.000639629630740707	0	6	0	8	10	147	146	469	6	21	6	7	4	7	7	0	Scaffold_338	2876407	2908286	hnrpc	IPR000504 RNA recognition motif domain;IPR012677 Nucleotide-binding alpha-beta plait domain superfamily;IPR017347 Heterogeneous nuclear ribonucleoprotein C;IPR035979 RNA-binding domain superfamily	go_function:GO:0003676 nucleic acid binding	Heterogeneous nuclear ribonucleoprotein C	NA	NA	SPol	SPol-UP g8078 hnrpc	SPol-UP g8078
g72537	Adra	SPol	-5.40028678395075	1.08785241057749	1.02737520307286e-05	0.000639629630740707	0	7	6	6	64	33	32	403	72	38	85	20	0	7	3	0	Scaffold_3002	909391	909881	Gm5153	IPR013106 Immunoglobulin V-set domain;IPR003599 Immunoglobulin subtype;IPR013783 Immunoglobulin-like fold;IPR007110 Immunoglobulin-like domain;IPR036179 Immunoglobulin-like domain superfamily	-	Anti-arsonate antibodies	NA	NA	SPol	SPol-UP g72537 Gm5153	SPol-UP g72537
g27194	Adra	SPol	-6.80940023550207	0.51852158846447	1.07956249284487e-05	0.000666376096010742	0	70	83	19	6	108	111	31	4	0	0	0	0	0	2	0	Scaffold_1224	131888	132171	NA	NA	NA	NA	NA	NA	SPol	SPol-UP g27194	SPol-UP g27194
g1490	Adra	SPol	-6.74821137126276	3.4733997154289	1.11988470531809e-05	0.00068734906587597	0	230	176	101	43	1345	572	55	43	6	0	0	3	10	8	0	Scaffold_80	5609	21293	NA	IPR001507 Zona pellucida domain;IPR042235 Zona pellucida, ZP-C domain	-	NA	NA	NA	SPol	SPol-UP g1490	SPol-UP g1490
g20621	Adra	SPol	-5.83987749769002	5.14317494990007	1.14279185931476e-05	0.000699427356607729	7	1152	1457	230	82	4000	1992	345	184	75	161	107	34	16	58	8	Scaffold_867	19245	33333	NA	IPR036397 Ribonuclease H superfamily;IPR041588 Integrase zinc-binding domain;IPR002156 Ribonuclease H domain;IPR009803 Protein of unknown function DUF1373;IPR012337 Ribonuclease H-like superfamily	go_function:GO:0003676 nucleic acid binding;go_function:GO:0004523 RNA-DNA hybrid ribonuclease activity	NA	NA	NA	SPol	SPol-UP g20621	SPol-UP g20621
g33670	Adra	SPol	-5.72774069232869	2.06329305542344	1.17662495362635e-05	0.000718105809725876	1	1	11	13	391	2	213	279	265	453	508	235	5	6	3	1	Scaffold_1502	194433	195359	NA	IPR003879 Butyrophylin-like, SPRY domain;IPR003877 SPRY domain;IPR006574 SPRY-associated;IPR043136 B30.2/SPRY domain superfamily;IPR001870 B30.2/SPRY domain;IPR013320 Concanavalin A-like lectin/glucanase domain superfamily	go_function:GO:0005515 protein binding	NA	NA	NA	SPol	SPol-UP g33670	SPol-UP g33670
g8388	Adra	SPol	-2.75631241595679	4.47913779434486	1.23371616186417e-05	0.00074873093453639	380	1185	167	1941	1225	971	388	1873	1022	402	1168	1098	90	37	274	180	Scaffold_351	164704	185238	col4	IPR021190 Peptidase M10A;IPR024079 Metallopeptidase, catalytic domain superfamily;IPR002477 Peptidoglycan binding-like;IPR001818 Peptidase M10, metallopeptidase;IPR036365 PGBD-like superfamily	go_process:GO:0006508 proteolysis;go_function:GO:0008270 zinc ion binding;go_function:GO:0004222 metalloendopeptidase activity;go_function:GO:0008237 metallopeptidase activity;go_component:GO:0031012 extracellular matrix	Collagenase 3	NA	NA	SPol	SPol-UP g8388 col4	SPol-UP g8388
g30641	Adra	SPol	-5.25107600072019	0.0928618742580529	1.42453298147306e-05	0.00085259479493357	3	3	2	3	17	92	6	109	9	6	14	9	1	3	0	1	Scaffold_1367	46215	46772	NA	NA	-	NA	NA	NA	SPol	SPol-UP g30641	SPol-UP g30641
g57520	Adra	SPol	-9.85949514317099	4.01850617137192	1.61842071679188e-05	0.000945140249326493	4	1005	2631	8	2809	10	436	74	3	0	0	0	0	0	3	0	Scaffold_2452	777128	787671	G1P3	IPR009311 Interferon alpha-inducible protein IFI6/IFI27-like;IPR038213 IFI6/IFI27-like domain superfamily	go_component:GO:0016021 integral component of membrane	ISG12(b)	NA	NA	SPol	SPol-UP g57520 G1P3	SPol-UP g57520
g25165	Adra	SPol	-7.20975183846074	-1.29118377519063	1.67978993688955e-05	0.00097834217130777	0	18	30	7	3	28	25	10	3	3	0	0	0	0	0	0	Scaffold_1126	2660731	2674854	Aaat	IPR036458 Sodium:dicarboxylate symporter superfamily;IPR001991 Sodium:dicarboxylate symporter;IPR018107 Sodium:dicarboxylate symporter, conserved site	go_component:GO:0016021 integral component of membrane;go_function:GO:0015293 symporter activity	ATB(0)	ATB(0)	ion transport; cellular sodium ion homeostasis; potassium ion transmembrane transport; anion transmembrane transport; chloride transmembrane transport	SPol	SPol-UP g25165 Aaat	SPol-UP g25165 ATB(0)
g64771	Cab	March	10.2783873479113	4.4693566552525	2.60380304632868e-107	5.54896467203105e-103	392	890	1754	1286	341	476	291	1105	0	4	0	0	155	1494	603	1035	Scaffold_2702	2075323	2076255	TMEM3	IPR002659 Glycosyl transferase, family 31	go_function:GO:0016758 transferase activity, transferring hexosyl groups;go_component:GO:0016020 membrane;go_process:GO:0006486 protein glycosylation	BGnT-7	NA	NA	Cab	Cab-UP g64771 TMEM3	Cab-UP g64771
g54554	Cab	March	12.0710167855942	5.88452106838551	8.30385295068224e-59	5.8987803410663e-55	571	1751	3859	7304	1566	11	0	0	0	0	3	0	3	0	5	0	Scaffold_2352	35338	39651	NA	IPR008803 RHD3/Sey1;IPR030383 Very large inducible GTPASE (VLIG)-type guanine nucleotide-binding (G) domain;IPR027417 P-loop containing nucleoside triphosphate hydrolase	go_function:GO:0005525 GTP binding	NA	NA	NA	Cab	Cab-UP g54554	Cab-UP g54554
g10729	Cab	March	13.0157691076825	4.20195825151546	9.35196185838878e-49	3.32166098606872e-45	165	927	1669	1049	2493	1604	424	2739	0	0	0	0	0	0	0	0	Scaffold_461	78458	105936	DCTD	IPR002125 Cytidine and deoxycytidylate deaminase domain;IPR015517 Deoxycytidylate deaminase-related;IPR016192 APOBEC/CMP deaminase, zinc-binding;IPR035105 Deoxycytidylate deaminase domain;IPR016193 Cytidine deaminase-like	go_function:GO:0016787 hydrolase activity;go_function:GO:0008270 zinc ion binding;go_function:GO:0003824 catalytic activity	dCMP deaminase	NA	NA	Cab	Cab-UP g10729 DCTD	Cab-UP g10729
g59809	Cab	March	3.62500904989943	7.28633738838542	5.29197572691579e-41	1.40971618395378e-37	2649	4014	12225	10697	3306	3293	3553	6365	801	572	1068	583	9376	19303	14473	15158	Scaffold_2534	14471	22325	NA	IPR040581 SNTX, thioredoxin-like domain	-	Cytolytic toxin-alpha	NA	NA	Cab	Cab-UP g59809	Cab-UP g59809
g45661	Cab	March	11.1612386989584	2.35274250312814	1.21682696615228e-40	2.88131105285235e-37	61	175	453	396	7	8	0	0	0	0	0	0	0	0	4	0	Scaffold_2031	262636	264018	NA	NA	-	NA	NA	NA	Cab	Cab-UP g45661	Cab-UP g45661
g1406	Cab	March	3.69503125252158	5.18857444862415	4.47391972950057e-35	7.94530861294888e-32	839	936	2408	2233	852	1006	759	1090	178	184	243	82	572	1055	407	253	Scaffold_78	798933	817460	Trh1	IPR006634 TRAM/LAG1/CLN8 homology domain;IPR001356 Homeobox domain;IPR016439 Sphingosine N-acyltransferase Lag1/Lac1-like;IPR009057 Homeobox-like domain superfamily	go_component:GO:0016021 integral component of membrane;go_function:GO:0003677 DNA binding;go_function:GO:0050291 sphingosine N-acyltransferase activity;go_process:GO:0046513 ceramide biosynthetic process	CerS2	NA	NA	Cab	Cab-UP g1406 Trh1	Cab-UP g1406
g43722	Cab	March	3.68731994431653	6.9449703904979	1.61460533637903e-31	2.45777530882667e-28	1986	3372	11223	6775	2555	1037	3294	4027	652	751	524	358	8985	2486	903	702	Scaffold_1946	397743	406090	OTOP2	IPR008564 Golgi apparatus membrane protein TVP23-like;IPR004878 Otopetrin	go_component:GO:0016021 integral component of membrane	Golgi apparatus membrane protein TVP23 homolog B	NA	NA	Cab	Cab-UP g43722 OTOP2	Cab-UP g43722
g21366	Cab	March	3.05460999571495	3.73628836133465	1.86819470599789e-31	2.65420649196806e-28	272	423	573	987	810	348	339	588	93	92	109	72	930	2514	265	151	Scaffold_906	225502	233362	NAC1	IPR018379 BEN domain;IPR000210 BTB/POZ domain;IPR011333 SKP1/BTB/POZ domain superfamily	go_function:GO:0005515 protein binding	BTB/POZ domain-containing protein 14A	NA	NA	Cab	Cab-UP g21366 NAC1	Cab-UP g21366
g15815	Cab	March	13.4671570015924	4.65129758303444	2.36588772887186e-31	3.15121458687426e-28	329	2052	1280	653	99	263	0	652	0	0	0	0	311	663	781	625	Scaffold_674	44223	67595	NA	NA	-	NA	NA	NA	Cab	Cab-UP g15815	Cab-UP g15815
g28807	Cab	March	2.6045193379262	6.5862687544212	6.33807969272635e-29	6.71216425566311e-26	1456	3410	6736	4425	4069	2605	2266	5128	896	851	1161	608	1628	4385	4744	4685	Scaffold_1305	583683	590901	cyp2k1	IPR002401 Cytochrome P450, E-class, group I;IPR001128 Cytochrome P450;IPR036396 Cytochrome P450 superfamily;IPR017972 Cytochrome P450, conserved site	go_function:GO:0004497 monooxygenase activity;go_function:GO:0020037 heme binding;go_function:GO:0005506 iron ion binding;go_function:GO:0016705 oxidoreductase activity, acting on paired donors, with incorporation or reduction of molecular oxygen	Debrisoquine 4-hydroxylase	NA	NA	Cab	Cab-UP g28807 cyp2k1	Cab-UP g28807
g46855	Cab	March	2.3998177872397	5.95791830975695	6.61421094124749e-29	6.71216425566311e-26	955	1961	3612	3796	2506	842	904	2349	773	529	867	407	1776	3073	1896	2719	Scaffold_2068	748624	759713	BTF1	IPR003879 Butyrophylin-like, SPRY domain;IPR001841 Zinc finger, RING-type;IPR003877 SPRY domain;IPR006574 SPRY-associated;IPR043136 B30.2/SPRY domain superfamily;IPR013083 Zinc finger, RING/FYVE/PHD-type;IPR027370 RING-type zinc-finger, LisH dimerisation motif;IPR017907 Zinc finger, RING-type, conserved site;IPR001870 B30.2/SPRY domain;IPR013320 Concanavalin A-like lectin/glucanase domain superfa…	go_function:GO:0005515 protein binding	Erythroid membrane-associated protein	NA	NA	Cab	Cab-UP g46855 BTF1	Cab-UP g46855
g46238	Cab	March	8.7683916818398	1.42106523564811	2.31167835515006e-28	2.14192075767839e-25	68	98	196	118	107	67	60	205	0	1	0	0	0	0	0	0	Scaffold_2052	924648	925652	NA	IPR043636 L1 transposable element, RRM domain;IPR004244 Transposase, L1	-	NA	NA	NA	Cab	Cab-UP g46238	Cab-UP g46238
g63311	Cab	March	8.74482860685638	1.39765784225855	5.63862713256405e-28	4.8065913128829e-25	67	95	195	116	105	67	59	199	0	1	0	0	0	0	0	0	Scaffold_2647	129804	130808	NA	IPR043636 L1 transposable element, RRM domain;IPR004244 Transposase, L1	-	NA	NA	NA	Cab	Cab-UP g63311	Cab-UP g63311
g31829	Cab	March	8.70464639794051	1.35612005610554	8.45328497869809e-27	6.57468479737196e-24	68	92	184	110	100	64	59	199	0	1	0	0	0	0	0	0	Scaffold_1412	2844153	2845157	NA	IPR043636 L1 transposable element, RRM domain;IPR004244 Transposase, L1	-	NA	NA	NA	Cab	Cab-UP g31829	Cab-UP g31829
g51708	Cab	March	8.67403247563984	1.32658115493313	8.6383170346964e-27	6.57468479737196e-24	65	90	184	109	101	64	58	199	0	1	0	0	0	0	0	0	Scaffold_2255	163466	164470	NA	IPR043636 L1 transposable element, RRM domain;IPR004244 Transposase, L1	-	NA	NA	NA	Cab	Cab-UP g51708	Cab-UP g51708
g66660	Cab	March	2.60006900511397	8.98762982101199	1.73731365157136e-25	1.19431907189152e-22	9771	20728	25101	22146	19845	11901	10289	27350	5159	4488	5077	3664	13684	29218	14950	17922	Scaffold_2774	1316156	1316782	cldn7	IPR003549 Claudin-3;IPR004031 PMP-22/EMP/MP20/Claudin superfamily;IPR006187 Claudin	go_component:GO:0005923 bicellular tight junction;go_function:GO:0005198 structural molecule activity;go_component:GO:0016021 integral component of membrane	Claudin-3	Claudin-1	hyperosmotic salinity response	Cab	Cab-UP g66660 cldn7	Cab-UP g66660 Claudin-1
g8903	Cab	March	8.61211716634136	1.26252865748212	5.32690740031302e-25	3.33887422376678e-22	65	90	167	98	103	62	58	196	0	1	0	0	0	0	0	0	Scaffold_364	2677084	2678088	NA	IPR043636 L1 transposable element, RRM domain;IPR004244 Transposase, L1	-	NA	NA	NA	Cab	Cab-UP g8903	Cab-UP g8903
g10822	Cab	March	9.49112705100055	0.699060731762922	3.03482625632121e-24	1.79653284301281e-21	29	51	113	129	0	33	0	100	0	0	0	0	15	53	40	44	Scaffold_465	239364	242052	NA	NA	-	NA	NA	NA	Cab	Cab-UP g10822	Cab-UP g10822
g32564	Cab	March	3.90309501577176	6.27544636512178	3.48826147065168e-24	2.00914432975832e-21	1775	4068	2209	4164	8075	1990	628	1328	286	387	348	227	473	1544	857	1112	Scaffold_1439	336837	343905	NA	IPR012317 Poly(ADP-ribose) polymerase, catalytic domain	go_function:GO:0003950 NAD+ ADP-ribosyltransferase activity	NA	NA	NA	Cab	Cab-UP g32564	Cab-UP g32564
g29244	Cab	March	3.23419370191194	4.91008873113384	4.68427776510371e-24	2.62701693295066e-21	730	835	1979	1373	350	429	959	691	140	267	219	121	642	3537	1233	1421	Scaffold_1318	928456	944399	rdgC	IPR006186 Serine/threonine-specific protein phosphatase/bis(5-nucleosyl)-tetraphosphatase;IPR002048 EF-hand domain;IPR004843 Calcineurin-like phosphoesterase domain, ApaH type;IPR029052 Metallo-dependent phosphatase-like;IPR012008 Serine/threonine-protein phosphatase with EF-hands;IPR018247 EF-Hand 1, calcium-binding site;IPR000048 IQ motif, EF-hand binding site;IPR011992 EF-hand domain pair	go_function:GO:0016787 hydrolase activity;go_function:GO:0005509 calcium ion binding;go_function:GO:0030145 manganese ion binding;go_function:GO:0005506 iron ion binding;go_function:GO:0004721 phosphoprotein phosphatase activity;go_process:GO:0050906 detection of stimulus involved in sensory perception;go_function:GO:0005515 protein binding	Serine/threonine-protein phosphatase 5	NA	NA	Cab	Cab-UP g29244 rdgC	Cab-UP g29244
g61150	Cab	March	8.49592735354578	1.14583215080909	3.13737710460776e-23	1.71437547375118e-20	61	83	154	87	128	81	67	253	0	1	0	0	0	0	0	0	Scaffold_2572	616246	617205	NA	IPR043636 L1 transposable element, RRM domain;IPR004244 Transposase, L1	-	NA	NA	NA	Cab	Cab-UP g61150	Cab-UP g61150
g33600	Cab	March	4.22693826182938	3.99074757360818	8.52793176453374e-23	4.54346884584946e-20	285	582	792	1310	1064	792	681	924	30	95	64	22	753	702	577	626	Scaffold_1497	573869	589402	NA	IPR002589 Macro domain;IPR012317 Poly(ADP-ribose) polymerase, catalytic domain;IPR043472 Macro domain-like	go_function:GO:0003950 NAD+ ADP-ribosyltransferase activity	NA	NA	NA	Cab	Cab-UP g33600	Cab-UP g33600
g33608	Cab	March	3.98350248593499	3.07795350829934	1.67199520352174e-22	8.69070482493944e-20	142	188	616	719	404	262	264	237	21	52	36	20	1030	994	1079	249	Scaffold_1497	617931	627905	NA	IPR002589 Macro domain;IPR012317 Poly(ADP-ribose) polymerase, catalytic domain;IPR043472 Macro domain-like	go_function:GO:0003950 NAD+ ADP-ribosyltransferase activity	NA	NA	NA	Cab	Cab-UP g33608	Cab-UP g33608
g50557	Cab	March	2.7692503878744	7.09632894830032	4.60040907954871e-22	2.27998413707588e-19	2328	3915	9010	8384	3924	2909	7891	4921	1517	729	1027	1117	9798	9391	6557	9407	Scaffold_2204	64702	72447	azi2	IPR002433 Ornithine decarboxylase;IPR000183 Ornithine/DAP/Arg decarboxylase;IPR029066 PLP-binding barrel;IPR009006 Alanine racemase/group IV decarboxylase, C-terminal;IPR022643 Orn/DAP/Arg decarboxylase 2, C-terminal;IPR022644 Orn/DAP/Arg decarboxylase 2, N-terminal;IPR022653 Orn/DAP/Arg decarboxylase 2, pyridoxal-phosphate binding site	go_process:GO:0006596 polyamine biosynthetic process;go_function:GO:0003824 catalytic activity	ODC	NA	NA	Cab	Cab-UP g50557 azi2	Cab-UP g50557
g34957	Cab	March	2.44358001025532	5.57590366738726	1.26950466119574e-21	6.1487304169869e-19	717	2093	2592	2080	187	273	382	638	417	447	624	409	205	761	190	407	Scaffold_1586	494249	520442	NA	IPR003599 Immunoglobulin subtype;IPR013783 Immunoglobulin-like fold;IPR007110 Immunoglobulin-like domain;IPR036179 Immunoglobulin-like domain superfamily;IPR027417 P-loop containing nucleoside triphosphate hydrolase	-	NA	NA	NA	Cab	Cab-UP g34957	Cab-UP g34957
g66668	Cab	March	4.65304024028981	4.72695692325624	8.26823877954316e-21	3.69354768861455e-18	569	1032	2119	925	287	338	591	913	60	118	32	46	1402	3979	599	629	Scaffold_2774	1361292	1361957	cldn7	IPR004031 PMP-22/EMP/MP20/Claudin superfamily;IPR006187 Claudin	go_component:GO:0016021 integral component of membrane;go_component:GO:0005923 bicellular tight junction;go_function:GO:0005198 structural molecule activity	Claudin-3	Claudin-1	hyperosmotic salinity response	Cab	Cab-UP g66668 cldn7	Cab-UP g66668 Claudin-1
g46851	Cab	March	4.09919167099017	3.4158759349071	9.64127513622e-21	4.13620578599391e-18	323	415	324	582	30	16	68	124	39	47	36	28	94	124	50	268	Scaffold_2068	680751	688489	NA	IPR036816 Ribonuclease A-like domain superfamily	-	NA	NA	NA	Cab	Cab-UP g46851	Cab-UP g46851
g13522	Cab	March	3.64181715686727	5.16785974845416	7.78594680274146e-20	3.13068513798534e-17	946	1071	1759	2140	413	677	1020	1388	116	306	189	85	1990	3534	888	1054	Scaffold_605	1554107	1568876	HUT2	IPR029020 Ammonium/urea transporter;IPR004937 Urea transporter	go_component:GO:0016021 integral component of membrane;go_process:GO:0071918 urea transmembrane transport;go_function:GO:0015204 urea transmembrane transporter activity	Solute carrier family 14 member 1	NA	NA	Cab	Cab-UP g13522 HUT2	Cab-UP g13522
g30923	Cab	March	2.14577037080066	10.0289149188894	1.95669989318069e-17	6.9023969246056e-15	14694	33557	71221	48396	36493	49181	29195	68686	12104	10867	12908	12566	36212	65935	27432	29015	Scaffold_1376	13048	24419	CLCR	IPR001314 Peptidase S1A, chymotrypsin family;IPR001254 Serine proteases, trypsin domain;IPR043504 Peptidase S1, PA clan, chymotrypsin-like fold;IPR018114 Serine proteases, trypsin family, histidine active site;IPR033116 Serine proteases, trypsin family, serine active site;IPR009003 Peptidase S1, PA clan	go_process:GO:0006508 proteolysis;go_function:GO:0004252 serine-type endopeptidase activity	Plasminogen	NA	NA	Cab	Cab-UP g30923 CLCR	Cab-UP g30923
g21453	Cab	March	2.16174490799694	9.77078708364554	3.25500570970737e-17	1.11882946257377e-14	12128	28588	59748	40220	30360	41601	25219	57630	10010	8886	10767	10472	29776	54465	22746	24675	Scaffold_919	27850	40421	CLCR	IPR001314 Peptidase S1A, chymotrypsin family;IPR001254 Serine proteases, trypsin domain;IPR043504 Peptidase S1, PA clan, chymotrypsin-like fold;IPR033116 Serine proteases, trypsin family, serine active site;IPR018114 Serine proteases, trypsin family, histidine active site;IPR009003 Peptidase S1, PA clan	go_process:GO:0006508 proteolysis;go_function:GO:0004252 serine-type endopeptidase activity	Plasminogen	NA	NA	Cab	Cab-UP g21453 CLCR	Cab-UP g21453
g4418	Cab	March	9.85707210303458	1.05369685167759	7.7622180400313e-17	2.46896460673294e-14	36	98	200	50	0	0	0	7	0	0	0	0	7	18	21	27	Scaffold_189	605095	605506	NA	NA	-	NA	NA	NA	Cab	Cab-UP g4418	Cab-UP g4418
g27920	Cab	March	3.47731461072239	2.89911927635663	1.00363342070177e-16	3.09977272877905e-14	130	362	469	277	76	38	22	46	22	43	57	35	162	308	187	232	Scaffold_1270	306798	311706	NA	IPR000315 B-box-type zinc finger	go_function:GO:0008270 zinc ion binding	NA	NA	NA	Cab	Cab-UP g27920	Cab-UP g27920
g37897	Cab	March	4.59844922541531	4.69293892095393	1.44893036408162e-16	4.41116499842047e-14	543	443	2369	1700	794	923	1359	1034	73	24	57	95	341	111	227	51	Scaffold_1727	17328	19897	dapk1	IPR002957 Keratin, type I;IPR039008 Intermediate filament, rod domain	go_function:GO:0005198 structural molecule activity	CK-18	NA	NA	Cab	Cab-UP g37897 dapk1	Cab-UP g37897
g19523	Cab	March	2.6800322249307	2.51644848421894	2.19977417486973e-16	6.60273062544351e-14	77	216	369	310	73	410	122	260	66	39	52	39	312	630	220	404	Scaffold_804	3868583	3898252	dio1	IPR000643 Iodothyronine deiodinase;IPR036249 Thioredoxin-like superfamily	go_function:GO:0004800 thyroxine 5'-deiodinase activity	5DI	NA	NA	Cab	Cab-UP g19523 dio1	Cab-UP g19523
g13524	Cab	March	3.89519300784271	4.68374041980156	3.34008210242851e-16	9.88617912289638e-14	694	760	1640	1135	317	417	1082	1052	47	173	156	51	1394	2448	703	804	Scaffold_605	1572405	1576184	HUT2	IPR029020 Ammonium/urea transporter;IPR004937 Urea transporter	go_component:GO:0016021 integral component of membrane;go_process:GO:0071918 urea transmembrane transport;go_function:GO:0015204 urea transmembrane transporter activity	Solute carrier family 14 member 1	NA	NA	Cab	Cab-UP g13524 HUT2	Cab-UP g13524
g46852	Cab	March	4.01517939696841	2.25872967845004	1.03504873298052e-15	2.86466539591531e-13	100	175	306	257	635	142	11	38	18	10	40	6	182	289	163	96	Scaffold_2068	702202	705588	BTF2	IPR003879 Butyrophylin-like, SPRY domain;IPR003877 SPRY domain;IPR006574 SPRY-associated;IPR043136 B30.2/SPRY domain superfamily;IPR001870 B30.2/SPRY domain;IPR013320 Concanavalin A-like lectin/glucanase domain superfamily	go_function:GO:0005515 protein binding	Erythroid membrane-associated protein	NA	NA	Cab	Cab-UP g46852 BTF2	Cab-UP g46852
g15818	Cab	March	11.8217948307132	3.00574943914429	1.20498333828435e-15	3.29223075925356e-13	82	831	165	225	53	154	0	55	0	0	0	0	46	97	170	134	Scaffold_674	81147	85457	NA	NA	-	NA	NA	NA	Cab	Cab-UP g15818	Cab-UP g15818
g37145	Cab	March	3.6378788129906	3.24258402277566	9.05086194834511e-15	2.26921081154333e-12	111	339	971	376	186	196	263	485	34	59	35	47	130	279	182	284	Scaffold_1682	242	16120	NA	IPR036834 Blc2-like superfamily;IPR002475 Bcl2-like	go_process:GO:0042981 regulation of apoptotic process	NA	NA	NA	Cab	Cab-UP g37145	Cab-UP g37145
g62112	Cab	March	4.76344241550529	0.940682186390587	1.92703896837677e-14	4.77524737849736e-12	31	41	127	189	7	19	9	14	4	2	9	2	46	13	109	152	Scaffold_2607	1495949	1498019	NA	IPR029526 PiggyBac transposable element-derived protein	-	NA	NA	NA	Cab	Cab-UP g62112	Cab-UP g62112
g70667	Cab	March	2.01707854312459	4.22164435355795	1.96952254278034e-14	4.81725931851856e-12	323	623	1110	698	883	2184	859	595	195	258	305	190	533	532	307	403	Scaffold_2930	1130112	1136926	NA	IPR001841 Zinc finger, RING-type;IPR013083 Zinc finger, RING/FYVE/PHD-type;IPR017907 Zinc finger, RING-type, conserved site	-	NA	NA	NA	Cab	Cab-UP g70667	Cab-UP g70667
g16842	Cab	March	2.43206340832347	2.89444108694928	8.95491969460466e-14	2.0971241056233e-11	100	189	474	542	47	35	162	44	66	106	62	60	468	723	407	778	Scaffold_708	1077707	1086850	NA	IPR016186 C-type lectin-like/link domain superfamily;IPR001304 C-type lectin-like;IPR016187 C-type lectin fold	-	NA	NA	NA	Cab	Cab-UP g16842	Cab-UP g16842
g33603	Cab	March	5.0911298040406	1.88754058699783	2.4129272066043e-13	5.52923566666068e-11	61	118	192	365	177	168	151	209	16	7	0	3	244	279	223	158	Scaffold_1497	595394	602076	NA	IPR012677 Nucleotide-binding alpha-beta plait domain superfamily	-	NA	NA	NA	Cab	Cab-UP g33603	Cab-UP g33603
g29943	Cab	March	8.08208522383494	3.31170064583694	7.76642643010155e-13	1.67498609634536e-10	36	527	355	1293	50	78	0	268	0	0	7	2	25	6	27	0	Scaffold_1343	212711	216550	G5984	IPR000477 Reverse transcriptase domain;IPR043128 Reverse transcriptase/Diguanylate cyclase domain;IPR001584 Integrase, catalytic core;IPR041588 Integrase zinc-binding domain;IPR041373 Reverse transcriptase, RNase H-like domain;IPR036397 Ribonuclease H superfamily;IPR012337 Ribonuclease H-like superfamily;IPR043502 DNA/RNA polymerase superfamily	go_process:GO:0015074 DNA integration;go_function:GO:0003676 nucleic acid binding	Gag3-Pol3	NA	NA	Cab	Cab-UP g29943 G5984	Cab-UP g29943
g28075	Cab	March	2.0669781990357	4.7781729690211	7.78112822196005e-13	1.67498609634536e-10	565	840	1346	1213	733	482	604	922	302	229	423	374	1003	2200	629	468	Scaffold_1273	431823	433334	CIS	IPR000980 SH2 domain;IPR001496 SOCS box domain;IPR036860 SH2 domain superfamily;IPR028425 Cytokine-inducible SH2-containing protein;IPR036036 SOCS box-like domain superfamily	go_process:GO:0035556 intracellular signal transduction	CIS	NA	NA	Cab	Cab-UP g28075 CIS	Cab-UP g28075
g22996	Cab	March	2.35275872614225	1.76122682076647	3.91146892108196e-12	7.5779376524707e-10	50	105	156	250	157	142	92	123	40	39	38	24	4	122	165	3	Scaffold_1019	341277	370288	Alax	IPR012947 Threonyl/alanyl tRNA synthetase, SAD;IPR018163 Threonyl/alanyl tRNA synthetase, class II-like, putative editing domain superfamily	go_process:GO:0043039 tRNA aminoacylation;go_function:GO:0005524 ATP binding;go_function:GO:0004812 aminoacyl-tRNA ligase activity;go_function:GO:0000166 nucleotide binding	Alanyl-tRNA editing protein Aarsd1	NA	NA	Cab	Cab-UP g22996 Alax	Cab-UP g22996
g71551	Cab	March	3.87380032541234	7.27480863561846	4.30376952930698e-12	8.18907432491617e-10	789	10027	10182	8238	891	609	337	1266	905	733	532	375	2492	7594	1808	3274	Scaffold_2967	4680	14391	NA	IPR001506 Peptidase M12A;IPR006026 Peptidase, metallopeptidase;IPR024079 Metallopeptidase, catalytic domain superfamily	go_process:GO:0006508 proteolysis;go_function:GO:0004222 metalloendopeptidase activity;go_function:GO:0008270 zinc ion binding;go_function:GO:0008237 metallopeptidase activity	NA	NA	NA	Cab	Cab-UP g71551	Cab-UP g71551
g21190	Cab	March	4.32745464649712	2.74240732389565	5.87904274286212e-12	1.10874583976225e-09	79	256	749	212	64	1521	579	184	39	16	20	7	103	236	73	390	Scaffold_899	2387501	2392934	NA	IPR031984 Solute carrier family 3 member 2, N-terminal domain;IPR042280 4F2 cell-surface antigen heavy chain;IPR017853 Glycoside hydrolase superfamily	go_process:GO:0006865 amino acid transport	NA	NA	NA	Cab	Cab-UP g21190	Cab-UP g21190
g5510	Cab	March	2.62057731198091	7.27364592034135	9.11218028065462e-12	1.6886058605307e-09	2482	6199	11522	4554	764	534	1676	2508	1443	874	2219	1082	3164	4025	3287	2699	Scaffold_235	1249953	1251418	ba1	IPR002337 Haemoglobin, beta-type;IPR000971 Globin;IPR012292 Globin/Protoglobin;IPR009050 Globin-like superfamily	go_component:GO:0005833 hemoglobin complex;go_process:GO:0015671 oxygen transport;go_function:GO:0020037 heme binding;go_function:GO:0019825 oxygen binding	Beta-globin	NA	NA	Cab	Cab-UP g5510 ba1	Cab-UP g5510
g32532	Cab	March	2.49319808253632	2.00629509188239	2.79963713647532e-11	4.85065585491265e-09	90	128	191	196	93	85	103	105	39	43	28	40	0	8	0	0	Scaffold_1437	580498	586785	NA	IPR041373 Reverse transcriptase, RNase H-like domain;IPR041588 Integrase zinc-binding domain;IPR043502 DNA/RNA polymerase superfamily	-	NA	NA	NA	Cab	Cab-UP g32532	Cab-UP g32532
g20111	Cab	March	5.27706727700826	-0.0912921053482774	4.06506021558092e-11	6.9304398603396e-09	12	26	76	70	9	0	0	0	2	0	0	3	141	120	5	119	Scaffold_839	94091	98853	NA	NA	-	NA	NA	NA	Cab	Cab-UP g20111	Cab-UP g20111
g47913	Cab	March	6.59328420014637	5.26259744948242	6.43503702227116e-11	1.07138339048141e-08	401	1490	3273	2979	841	1172	853	967	12	54	0	29	1179	543	616	457	Scaffold_2105	1033374	1055231	tsc	IPR002948 Thiazide-sensitive Na-K-Cl co-transporter;IPR018491 SLC12A transporter, C-terminal;IPR004841 Amino acid permease/ SLC12A domain;IPR004842 SLC12A transporter family	go_process:GO:0006811 ion transport;go_component:GO:0016020 membrane;go_function:GO:0022857 transmembrane transporter activity;go_process:GO:0055085 transmembrane transport;go_function:GO:0015377 cation:chloride symporter activity;go_component:GO:0016021 integral component of membrane	Bumetanide-sensitive sodium-(potassium)-chloride cotransporter 2	Bumetanide-sensitive sodium-(potassium)-chloride cotransporter 2	cellular hyperosmotic salinity response; potassium, sodium and chloride transmembrane ion transport; cellular ion homeostasis; cell volume homeostasis; hyperosmotic response	Cab	Cab-UP g47913 tsc	Cab-UP g47913 Bumetanide-sensitive sodium-(potassium)-chloride cotransporter 2
g46715	Cab	March	3.62260403962914	1.46556917827063	1.00602372715762e-10	1.64918243457354e-08	30	76	231	209	7	6	92	147	15	12	24	3	234	369	4	263	Scaffold_2066	243266	265405	Rdl	IPR006201 Neurotransmitter-gated ion-channel;IPR006028 Gamma-aminobutyric acid A receptor/Glycine receptor alpha;IPR006029 Neurotransmitter-gated ion-channel transmembrane domain;IPR036734 Neurotransmitter-gated ion-channel ligand-binding domain superfamily;IPR006202 Neurotransmitter-gated ion-channel ligand-binding domain;IPR018000 Neurotransmitter-gated ion-channel, conserved site;IPR036719 Neu…	go_component:GO:0016021 integral component of membrane;go_function:GO:0004888 transmembrane signaling receptor activity;go_function:GO:0005216 ion channel activity;go_process:GO:0034220 ion transmembrane transport;go_process:GO:0006811 ion transport;go_function:GO:0005230 extracellular ligand-gated ion channel activity	GABA(C) receptor	NA	NA	Cab	Cab-UP g46715 Rdl	Cab-UP g46715
g21100	Cab	March	3.79920031627423	0.851461579924173	1.1220259855785e-10	1.82530502127201e-08	25	51	123	147	4	32	15	22	5	5	18	3	39	25	146	104	Scaffold_899	756552	758380	NA	IPR029526 PiggyBac transposable element-derived protein	-	NA	NA	NA	Cab	Cab-UP g21100	Cab-UP g21100
g14649	Cab	March	2.56215014189544	2.01648203061623	4.49034248430639e-10	6.72493122218371e-08	44	210	180	222	148	39	42	57	33	37	49	30	62	32	30	60	Scaffold_629	343767	351400	Adora2b	IPR001634 Adenosine receptor;IPR000276 G protein-coupled receptor, rhodopsin-like;IPR001513 Adenosine A2A receptor;IPR017452 GPCR, rhodopsin-like, 7TM	go_component:GO:0016021 integral component of membrane;go_process:GO:0001973 G protein-coupled adenosine receptor signaling pathway;go_function:GO:0001609 G protein-coupled adenosine receptor activity;go_process:GO:0007186 G protein-coupled receptor signaling pathway;go_function:GO:0004930 G protein-coupled receptor activity	Adenosine receptor A2b	Adenosine receptor A2b	positive regulation of potassium ion transport; response to angiotensin; negative regulation of blood vessel diameter; negative regulation of blood pressure; negative regulation of systemic arterial blood pressure; positive regulation of systemic arterial blood pressure; positive regulation of urine volume; positive regulation of blood vessel diameter; positive regulation of renal sodium excretio…	Cab	Cab-UP g14649 Adora2b	Cab-UP g14649 Adenosine receptor A2b
g51806	Cab	March	2.13060681559794	4.43124280955435	4.5125295142052e-10	6.72493122218371e-08	334	683	1257	1128	633	889	593	1913	114	285	420	218	591	2279	959	1127	Scaffold_2260	179875	183989	NA	NA	-	NA	NA	NA	Cab	Cab-UP g51806	Cab-UP g51806
g58358	Cab	March	2.09250827735533	1.82823605070769	4.73330784505382e-10	6.95665679213393e-08	48	139	184	173	57	47	58	77	43	41	53	34	58	83	91	144	Scaffold_2484	82380	84048	NA	NA	-	NA	NA	NA	Cab	Cab-UP g58358	Cab-UP g58358
g36370	Cab	March	5.36806134907473	-0.693212710072474	5.03912205869897e-10	7.25599528330634e-08	14	17	38	40	5	20	0	10	0	3	0	0	22	32	31	17	Scaffold_1663	191555	192112	NA	IPR025307 FIIND domain	-	NA	NA	NA	Cab	Cab-UP g36370	Cab-UP g36370
g61557	Cab	March	3.54559984772208	0.947943374789048	5.39967744664808e-10	7.62069709043161e-08	52	90	66	81	14	10	11	28	12	9	13	5	50	33	15	49	Scaffold_2589	817382	820872	NA	IPR002156 Ribonuclease H domain;IPR036397 Ribonuclease H superfamily;IPR012337 Ribonuclease H-like superfamily	go_function:GO:0003676 nucleic acid binding;go_function:GO:0004523 RNA-DNA hybrid ribonuclease activity	NA	NA	NA	Cab	Cab-UP g61557	Cab-UP g61557
g50063	Cab	March	3.87843018011625	3.549895803025	7.15843193058774e-10	9.842151153081e-08	51	528	403	1494	75	103	21	291	35	61	60	35	46	29	70	27	Scaffold_2193	560004	645219	NA	IPR043128 Reverse transcriptase/Diguanylate cyclase domain;IPR000477 Reverse transcriptase domain;IPR036397 Ribonuclease H superfamily;IPR041588 Integrase zinc-binding domain;IPR041577 Reverse transcriptase/retrotransposon-derived protein, RNase H-like domain;IPR001584 Integrase, catalytic core;IPR043502 DNA/RNA polymerase superfamily;IPR029063 S-adenosyl-L-methionine-dependent methyltransferase;…	go_function:GO:0003676 nucleic acid binding;go_process:GO:0015074 DNA integration	NA	NA	NA	Cab	Cab-UP g50063	Cab-UP g50063
g32813	Cab	March	8.88618860093865	0.0131121131158973	1.07951572816235e-09	1.44689054609231e-07	48	28	18	58	0	0	0	0	0	0	0	0	0	51	27	18	Scaffold_1466	487546	488882	NA	NA	-	NA	NA	NA	Cab	Cab-UP g32813	Cab-UP g32813
g37890	Cab	March	2.0223859669455	4.06195221973787	1.32561563262864e-09	1.75467048117695e-07	229	396	1229	892	498	388	659	1119	114	243	279	203	432	617	363	665	Scaffold_1725	43635	47028	NA	IPR013151 Immunoglobulin;IPR013783 Immunoglobulin-like fold;IPR007110 Immunoglobulin-like domain;IPR036179 Immunoglobulin-like domain superfamily	-	NA	NA	NA	Cab	Cab-UP g37890	Cab-UP g37890
g34814	Cab	March	4.33770619246673	0.139086370522665	1.35258712375852e-09	1.76840393830784e-07	20	45	54	76	6	0	0	0	1	4	8	0	50	56	38	47	Scaffold_1579	595161	601433	NA	NA	-	NA	NA	NA	Cab	Cab-UP g34814	Cab-UP g34814
g59821	Cab	March	2.29625368369128	3.24424075476028	1.41079713362861e-09	1.82215137665207e-07	114	401	590	416	183	198	49	225	120	130	128	42	188	377	235	294	Scaffold_2534	172357	174924	NA	IPR001811 Chemokine interleukin-8-like domain;IPR039809 Chemokine beta/gamma/delta;IPR036048 Chemokine interleukin-8-like superfamily	go_component:GO:0005576 extracellular region;go_process:GO:0006955 immune response;go_function:GO:0008009 chemokine activity	NA	NA	NA	Cab	Cab-UP g59821	Cab-UP g59821
g21972	Cab	March	2.26290422065762	4.74437069456633	1.46231367927944e-09	1.87731125416411e-07	532	1202	582	1492	265	376	255	505	334	265	331	248	360	1291	612	659	Scaffold_960	161448	162744	NA	IPR000975 Interleukin-1 family;IPR003296 Interleukin-1 beta;IPR008996 Cytokine IL1/FGF	go_function:GO:0005125 cytokine activity;go_component:GO:0005615 extracellular space;go_process:GO:0006954 inflammatory response;go_process:GO:0006955 immune response;go_function:GO:0005149 interleukin-1 receptor binding;go_component:GO:0005576 extracellular region	NA	NA	NA	Cab	Cab-UP g21972	Cab-UP g21972
g66178	Cab	March	8.52224700276899	-0.214948927939694	1.66333102096885e-09	2.10995520165876e-07	9	42	15	103	0	0	0	0	0	0	0	0	4	26	0	0	Scaffold_2758	62502	70823	NA	IPR032071 Domain of unknown function DUF4806	-	NA	NA	NA	Cab	Cab-UP g66178	Cab-UP g66178
g33601	Cab	March	5.93730084143558	-0.153436530525212	2.35873296483241e-09	2.87239761220249e-07	9	59	42	51	56	44	28	37	3	0	0	0	26	98	44	48	Scaffold_1497	590679	592235	NA	IPR036691 Endonuclease/exonuclease/phosphatase superfamily;IPR005135 Endonuclease/exonuclease/phosphatase;IPR027124 SWR1-complex protein 5/Craniofacial development protein 1/2	go_function:GO:0003824 catalytic activity	NA	NA	NA	Cab	Cab-UP g33601	Cab-UP g33601
g3267	Cab	March	2.09023137748328	3.9674504539023	2.94082949293236e-09	3.54079193920235e-07	213	469	1106	733	448	127	302	397	173	119	192	248	730	1683	3401	1280	Scaffold_143	810521	817890	cyp3a27	IPR002401 Cytochrome P450, E-class, group I;IPR001128 Cytochrome P450;IPR036396 Cytochrome P450 superfamily;IPR017972 Cytochrome P450, conserved site	go_function:GO:0004497 monooxygenase activity;go_function:GO:0020037 heme binding;go_function:GO:0005506 iron ion binding;go_function:GO:0016705 oxidoreductase activity, acting on paired donors, with incorporation or reduction of molecular oxygen	Cytochrome P450-PCN1	NA	NA	Cab	Cab-UP g3267 cyp3a27	Cab-UP g3267
g48758	Cab	March	2.62283107946201	0.767129573388623	6.59325655996122e-09	7.59507516482884e-07	31	42	108	100	78	36	0	128	11	11	22	15	39	117	90	89	Scaffold_2134	18930	27306	NA	IPR007053 LRAT domain	-	NA	NA	NA	Cab	Cab-UP g48758	Cab-UP g48758
g39567	Cab	March	2.90153768567639	4.36308931952908	6.73721918697493e-09	7.71918699428079e-07	214	1118	1615	488	140	3707	1357	349	181	179	109	140	135	139	144	206	Scaffold_1803	763244	780642	cfaD	IPR000668 Peptidase C1A, papain C-terminal;IPR013201 Cathepsin propeptide inhibitor domain (I29);IPR000169 Cysteine peptidase, cysteine active site;IPR025660 Cysteine peptidase, histidine active site;IPR025661 Cysteine peptidase, asparagine active site;IPR039417 Papain-like cysteine endopeptidase;IPR038765 Papain-like cysteine peptidase superfamily	go_process:GO:0006508 proteolysis;go_function:GO:0008234 cysteine-type peptidase activity	Cathepsin L heavy chain	Cathepsin L heavy chain	response to osmotic stress; positive regulation of cation channel activity	Cab	Cab-UP g39567 cfaD	Cab-UP g39567 Cathepsin L heavy chain
g8037	Cab	March	2.48184111262843	1.55378089249221	7.47760705181962e-09	8.44469120303271e-07	40	132	163	128	56	75	37	116	38	18	32	24	17	28	15	26	Scaffold_338	1906308	1912936	NA	NA	-	NA	NA	NA	Cab	Cab-UP g8037	Cab-UP g8037
g39237	Cab	March	6.27166162503566	1.63249536350698	7.49972002148309e-09	8.44469120303271e-07	55	265	100	63	7	36	11	33	6	0	4	0	81	11	90	29	Scaffold_1795	112396	113019	ba1	IPR002337 Haemoglobin, beta-type;IPR012292 Globin/Protoglobin;IPR000971 Globin;IPR009050 Globin-like superfamily	go_component:GO:0005833 hemoglobin complex;go_process:GO:0015671 oxygen transport;go_function:GO:0020037 heme binding;go_function:GO:0019825 oxygen binding	Beta-globin	NA	NA	Cab	Cab-UP g39237 ba1	Cab-UP g39237
g57784	Cab	March	8.0500409162745	-0.733753452250232	7.65833419649753e-09	8.50035208653953e-07	21	9	52	20	13	46	8	20	0	0	0	0	0	102	29	3	Scaffold_2461	984148	984921	NA	NA	-	NA	NA	NA	Cab	Cab-UP g57784	Cab-UP g57784
g35068	Cab	March	2.26428960448417	8.19448953985511	8.12498281777465e-09	8.87956455536388e-07	8327	7464	7990	16335	1419	611	342	1152	3147	2630	3157	3641	719	1538	466	843	Scaffold_1590	435196	438361	rush	IPR001849 Pleckstrin homology domain;IPR000306 FYVE zinc finger;IPR015095 Alkylated DNA repair protein AlkB, homologue 8, N-terminal;IPR013083 Zinc finger, RING/FYVE/PHD-type;IPR011993 PH-like domain superfamily;IPR017455 Zinc finger, FYVE-related;IPR011011 Zinc finger, FYVE/PHD-type	go_function:GO:0046872 metal ion binding;go_function:GO:0016706 2-oxoglutarate-dependent dioxygenase activity;go_function:GO:0008168 methyltransferase activity	PH domain-containing family F member 2	NA	NA	Cab	Cab-UP g35068 rush	Cab-UP g35068
g16273	Cab	March	4.55984871584484	1.37011306038724	8.57140548518686e-09	9.31965419871516e-07	41	94	142	217	0	10	0	9	4	0	5	15	3	39	0	23	Scaffold_689	2649287	2655400	NA	IPR000569 HECT domain;IPR035983 HECT, E3 ligase catalytic domain	go_function:GO:0004842 ubiquitin-protein transferase activity	NA	NA	NA	Cab	Cab-UP g16273	Cab-UP g16273
g25169	Cab	March	2.48195122865031	3.06193917850439	9.10933114081986e-09	9.85426172294477e-07	130	457	331	314	174	29	59	134	81	80	60	92	50	108	63	37	Scaffold_1126	2715101	2715945	NA	IPR003597 Immunoglobulin C1-set;IPR013783 Immunoglobulin-like fold;IPR003006 Immunoglobulin/major histocompatibility complex, conserved site;IPR007110 Immunoglobulin-like domain;IPR036179 Immunoglobulin-like domain superfamily	-	NA	NA	NA	Cab	Cab-UP g25169	Cab-UP g25169
g49881	Cab	March	2.67880382171429	2.16231849936527	1.35495404967086e-08	1.41546204669293e-06	40	154	359	259	69	353	238	105	29	21	64	39	46	140	12	95	Scaffold_2184	1367365	1372685	NA	IPR040521 Kyakuja-Dileera-Zisupton transposase;IPR040564 CxC3 like cysteine cluster	-	NA	NA	NA	Cab	Cab-UP g49881	Cab-UP g49881
g26980	Cab	March	2.67748619405375	2.16118711219803	1.3964513608964e-08	1.45169633912503e-06	40	154	359	258	69	354	238	105	29	21	64	39	46	140	12	95	Scaffold_1208	44545	49865	NA	IPR040521 Kyakuja-Dileera-Zisupton transposase;IPR040564 CxC3 like cysteine cluster	-	NA	NA	NA	Cab	Cab-UP g26980	Cab-UP g26980
g23945	Cab	March	2.00107572910241	7.20973254382367	1.53477520927744e-08	1.5575044992815e-06	3407	5568	6453	3807	2025	2230	1707	2437	1849	2208	1997	1508	1995	2242	1888	4145	Scaffold_1073	5221797	5225925	GPX3	IPR000889 Glutathione peroxidase;IPR036249 Thioredoxin-like superfamily;IPR029760 Glutathione peroxidase conserved site	go_process:GO:0006979 response to oxidative stress;go_function:GO:0004602 glutathione peroxidase activity	GPx-3	NA	NA	Cab	Cab-UP g23945 GPX3	Cab-UP g23945
g70652	Cab	March	3.75485205615939	0.732686490544518	2.02684519029853e-08	1.98138063534183e-06	30	36	112	133	28	18	39	50	9	0	11	8	54	11	51	16	Scaffold_2930	851240	868371	NCL3	IPR022684 Peptidase C2, calpain family;IPR000008 C2 domain;IPR022683 Peptidase C2, calpain, domain III;IPR001300 Peptidase C2, calpain, catalytic domain;IPR035892 C2 domain superfamily;IPR022682 Peptidase C2, calpain, large subunit, domain III;IPR000169 Cysteine peptidase, cysteine active site;IPR038765 Papain-like cysteine peptidase superfamily;IPR036213 Calpain large subunit, domain III superfa…	go_process:GO:0006508 proteolysis;go_function:GO:0004198 calcium-dependent cysteine-type endopeptidase activity	Calpain-5	NA	NA	Cab	Cab-UP g70652 NCL3	Cab-UP g70652
g61318	Cab	March	9.39940199075214	0.590643834145409	2.22656807505293e-08	2.13740505619157e-06	24	110	112	7	0	0	0	30	0	0	0	0	16	9	0	17	Scaffold_2582	371860	378228	ASB5	IPR002110 Ankyrin repeat;IPR020683 Ankyrin repeat-containing domain;IPR036770 Ankyrin repeat-containing domain superfamily	go_function:GO:0005515 protein binding	ASB-11	NA	NA	Cab	Cab-UP g61318 ASB5	Cab-UP g61318
g57223	Cab	March	7.92467063916926	-0.880946456670748	3.00734707931396e-08	2.7156598986127e-06	17	31	10	25	40	0	6	26	0	0	0	0	17	51	33	67	Scaffold_2438	377180	378733	NA	IPR000477 Reverse transcriptase domain	-	NA	NA	NA	Cab	Cab-UP g57223	Cab-UP g57223
g34954	Cab	March	3.95866628373014	2.75483585542131	3.27777567907294e-08	2.93498644944216e-06	113	436	105	457	251	35	11	25	18	11	26	43	252	389	54	38	Scaffold_1586	470350	481291	CLDN14	IPR004031 PMP-22/EMP/MP20/Claudin superfamily;IPR006187 Claudin;IPR017974 Claudin, conserved site;IPR027417 P-loop containing nucleoside triphosphate hydrolase	go_component:GO:0016021 integral component of membrane;go_component:GO:0005923 bicellular tight junction;go_function:GO:0005198 structural molecule activity	Claudin-20	NA	NA	Cab	Cab-UP g34954 CLDN14	Cab-UP g34954
g41327	Cab	March	7.85929539344459	5.82219080634922	3.48583516366157e-08	3.09527638219966e-06	1479	2044	3498	3035	345	53	578	193	0	43	0	16	5326	10847	3368	4192	Scaffold_1879	5071120	5077760	aga	IPR006035 Ureohydrolase;IPR014033 Arginase;IPR020855 Ureohydrolase, manganese-binding site;IPR023696 Ureohydrolase domain superfamily	go_function:GO:0046872 metal ion binding;go_process:GO:0006525 arginine metabolic process;go_function:GO:0004053 arginase activity;go_function:GO:0016813 hydrolase activity, acting on carbon-nitrogen (but not peptide) bonds, in linear amidines	Arginase-1	NA	NA	Cab	Cab-UP g41327 aga	Cab-UP g41327
g28324	Cab	March	4.02019009980725	3.01623864027461	3.8046794251666e-08	3.35047616651757e-06	56	500	683	255	63	2350	820	189	62	27	11	18	13	35	7	40	Scaffold_1286	779208	814795	tsc	IPR002948 Thiazide-sensitive Na-K-Cl co-transporter;IPR013612 Amino acid permease, N-terminal;IPR004841 Amino acid permease/ SLC12A domain;IPR018491 SLC12A transporter, C-terminal	go_process:GO:0006811 ion transport;go_component:GO:0016020 membrane;go_process:GO:0055085 transmembrane transport;go_function:GO:0022857 transmembrane transporter activity	Bumetanide-sensitive sodium-(potassium)-chloride cotransporter 2	Bumetanide-sensitive sodium-(potassium)-chloride cotransporter 2	cellular hyperosmotic salinity response; potassium, sodium and chloride transmembrane ion transport; cellular ion homeostasis; cell volume homeostasis; hyperosmotic response	Cab	Cab-UP g28324 tsc	Cab-UP g28324 Bumetanide-sensitive sodium-(potassium)-chloride cotransporter 2
g36894	Cab	March	5.30542807559157	-0.170352825256686	6.43126536814966e-08	5.41726072176432e-06	26	23	61	42	40	0	2	17	5	0	0	0	0	26	7	25	Scaffold_1670	776093	781490	NA	IPR035983 HECT, E3 ligase catalytic domain	go_function:GO:0004842 ubiquitin-protein transferase activity	NA	NA	NA	Cab	Cab-UP g36894	Cab-UP g36894
g32559	Cab	March	2.60622697068893	1.94999459045272	7.68255945602981e-08	6.29703940644044e-06	33	138	303	218	58	322	217	107	26	19	59	34	38	132	8	79	Scaffold_1439	303647	308967	NA	IPR040521 Kyakuja-Dileera-Zisupton transposase	-	NA	NA	NA	Cab	Cab-UP g32559	Cab-UP g32559
g63839	Cab	March	2.67180916053342	1.84025674323612	8.55783749307929e-08	6.8821160307552e-06	30	133	268	213	52	296	199	94	23	16	54	30	35	114	8	75	Scaffold_2664	9145	14465	NA	IPR040521 Kyakuja-Dileera-Zisupton transposase	-	NA	NA	NA	Cab	Cab-UP g63839	Cab-UP g63839
g4585	Cab	March	6.8888014986902	-0.508105491951207	9.75211883008069e-08	7.66890791099076e-06	31	27	31	13	0	0	1	2	0	1	0	0	0	0	7	0	Scaffold_196	268074	273087	NA	NA	-	NA	NA	NA	Cab	Cab-UP g4585	Cab-UP g4585
g46175	Cab	March	3.70526838829436	0.295832584021188	1.04627998662413e-07	8.10809919816247e-06	14	29	89	107	2	22	12	17	4	4	13	1	43	21	124	137	Scaffold_2050	84438	86118	NA	IPR029526 PiggyBac transposable element-derived protein	-	NA	NA	NA	Cab	Cab-UP g46175	Cab-UP g46175
g17074	Cab	March	2.67617285870334	1.63847261147877	1.06592137448939e-07	8.23038058396501e-06	27	114	237	179	45	240	179	82	20	14	45	27	31	89	8	65	Scaffold_710	2513926	2519246	NA	IPR040521 Kyakuja-Dileera-Zisupton transposase	-	NA	NA	NA	Cab	Cab-UP g17074	Cab-UP g17074
g4088	Cab	March	2.57531999552555	2.00360565081135	1.22741577084362e-07	9.37543279299227e-06	34	140	317	228	64	344	219	107	27	20	63	36	42	136	10	82	Scaffold_181	9144	14464	NA	IPR040521 Kyakuja-Dileera-Zisupton transposase	-	NA	NA	NA	Cab	Cab-UP g4088	Cab-UP g4088
g8885	Cab	March	2.02254641519693	3.52109477755198	1.50094133770103e-07	1.12233546834199e-05	159	499	276	801	354	139	88	192	156	152	125	136	60	182	67	105	Scaffold_364	2395902	2404046	NA	IPR013106 Immunoglobulin V-set domain;IPR003598 Immunoglobulin subtype 2;IPR003599 Immunoglobulin subtype;IPR013783 Immunoglobulin-like fold;IPR042474 Cell surface A33 antigen;IPR007110 Immunoglobulin-like domain;IPR036179 Immunoglobulin-like domain superfamily	go_component:GO:0005887 integral component of plasma membrane	NA	NA	NA	Cab	Cab-UP g8885	Cab-UP g8885
g43807	Cab	March	5.18743301528146	1.05523161454453	1.52870055385422e-07	1.13512674227133e-05	54	136	28	100	5	0	47	0	0	3	3	7	3	19	0	0	Scaffold_1948	69730	83088	NA	IPR012337 Ribonuclease H-like superfamily	-	NA	NA	NA	Cab	Cab-UP g43807	Cab-UP g43807
g58770	Cab	March	5.18743301528146	1.05523161454453	1.52870055385422e-07	1.13512674227133e-05	54	136	28	100	5	0	47	0	0	3	3	7	3	19	0	0	Scaffold_2505	1611243	1624601	NA	IPR012337 Ribonuclease H-like superfamily	-	NA	NA	NA	Cab	Cab-UP g58770	Cab-UP g58770
g47552	Cab	March	2.46544614993802	3.07804369385772	1.70999897530077e-07	1.24800644392584e-05	177	170	372	673	193	180	32	35	44	79	64	125	75	67	75	79	Scaffold_2086	1111506	1130224	kif8	IPR001752 Kinesin motor domain;IPR036961 Kinesin motor domain superfamily;IPR022140 Kinesin-like KIF1-type;IPR027640 Kinesin-like protein;IPR027417 P-loop containing nucleoside triphosphate hydrolase;IPR008984 SMAD/FHA domain superfamily	go_function:GO:0008017 microtubule binding;go_process:GO:0007018 microtubule-based movement;go_function:GO:0005524 ATP binding;go_function:GO:1990939 ATP-dependent microtubule motor activity;go_function:GO:0005515 protein binding	Kinesin-like protein KIF1B	NA	NA	Cab	Cab-UP g47552 kif8	Cab-UP g47552
g13723	Cab	March	2.25213701078386	1.11493687824783	1.84449457276366e-07	1.327973778384e-05	50	63	82	120	13	41	28	20	20	29	21	23	90	116	52	114	Scaffold_612	395544	399199	BRAL1	IPR000538 Link domain;IPR013106 Immunoglobulin V-set domain;IPR003599 Immunoglobulin subtype;IPR013783 Immunoglobulin-like fold;IPR016186 C-type lectin-like/link domain superfamily;IPR007110 Immunoglobulin-like domain;IPR016187 C-type lectin fold;IPR036179 Immunoglobulin-like domain superfamily	go_function:GO:0005540 hyaluronic acid binding;go_process:GO:0007155 cell adhesion	Brain link protein 1	NA	NA	Cab	Cab-UP g13723 BRAL1	Cab-UP g13723
g40683	Cab	March	2.51785195268349	2.02066433303839	2.87714722969776e-07	1.99722751179443e-05	34	140	324	226	66	349	219	107	29	20	63	40	42	138	12	87	Scaffold_1863	9144	14464	NA	IPR040521 Kyakuja-Dileera-Zisupton transposase	-	NA	NA	NA	Cab	Cab-UP g40683	Cab-UP g40683
g36369	Cab	March	4.47445146894984	-0.523755569398205	3.02733553991077e-07	2.08788180229898e-05	8	30	43	44	5	32	0	21	0	1	6	0	19	16	19	20	Scaffold_1663	190978	191472	NA	IPR001315 CARD domain;IPR011029 Death-like domain superfamily	go_process:GO:0042981 regulation of apoptotic process	NA	NA	NA	Cab	Cab-UP g36369	Cab-UP g36369
g34827	Cab	March	3.25474437684946	1.81220603282557	3.30319195639441e-07	2.22064112879247e-05	49	34	215	419	35	37	8	49	20	10	31	22	51	43	24	56	Scaffold_1581	4410	5020	NA	NA	NA	NA	NA	NA	Cab	Cab-UP g34827	Cab-UP g34827
g10578	Cab	March	2.25755750514543	5.01101139057153	3.3416836481118e-07	2.23945346619216e-05	745	1281	1594	731	509	1522	1055	1227	228	287	610	317	431	897	867	310	Scaffold_459	399526	428520	NA	IPR015095 Alkylated DNA repair protein AlkB, homologue 8, N-terminal;IPR000477 Reverse transcriptase domain;IPR038765 Papain-like cysteine peptidase superfamily;IPR043502 DNA/RNA polymerase superfamily	go_function:GO:0016706 2-oxoglutarate-dependent dioxygenase activity;go_function:GO:0008168 methyltransferase activity	NA	NA	NA	Cab	Cab-UP g10578	Cab-UP g10578
g67577	Cab	March	4.15332958465297	1.1923394724791	3.39813676329786e-07	2.26305289258252e-05	55	55	229	61	8	119	5	8	0	11	14	6	11	7	11	0	Scaffold_2812	386267	390972	GPR20	IPR000276 G protein-coupled receptor, rhodopsin-like;IPR017452 GPCR, rhodopsin-like, 7TM	go_component:GO:0016021 integral component of membrane;go_process:GO:0007186 G protein-coupled receptor signaling pathway;go_function:GO:0004930 G protein-coupled receptor activity	G-protein coupled receptor 20	NA	NA	Cab	Cab-UP g67577 GPR20	Cab-UP g67577
g1683	Cab	March	3.4201700428473	0.811241195961067	4.20463111503505e-07	2.73185651501561e-05	22	42	129	144	4	25	14	19	6	5	25	3	39	23	160	119	Scaffold_83	140780	142850	NA	IPR029526 PiggyBac transposable element-derived protein	-	NA	NA	NA	Cab	Cab-UP g1683	Cab-UP g1683
[truncated: 493 more rows]

## Sheet: Hoja 1 - gene_df_stomach
gene_id	sampleA	sampleB	logFC	logCPM	PValue	FDR	AT30482_1	AT30482_2	AT30483_1	AT30483_2	AT30484_1	AT30484_2	AT30485_1	AT30485_2	AT30487_1	AT30487_2	AT30488_1	AT30488_2	AT30489_1	AT30489_2	AT30490_1	AT30490_2	AT30493_1	AT30493_2	AT30494_1	AT30494_2	AT30495_1	AT30495_2	AT30496_1	AT30496_2	AT30503_1	AT30503_2	AT30504_1	AT30504_2	AT30505_1	AT30505_2	AT30506_1	AT30506_2	Scaffold_ID	Start	End	gene_name	InterPro_Annot	InterPro_GO_Terms	sma3s_Annot	Full_name_Salinity	Function_Salinity	overexpression	ID
[truncated: 504 more rows]
[truncated: 2 more columns]
