# Supplementary material
Source: Research Square preprint supplement (doi:10.21203/rs.3.rs-9115348/v1)
Supplement: Supplementary file 6 [file afd247936451922907048ec4.xlsx]

## Sheet: AdraSPol
annotated_AdraSPol_gill
	gene_id	logFC	logCPM	PValue	FDR	AT30482_1	AT30483_1	AT30484_1	AT30485_1	AT30487_1	AT30488_1	AT30489_1	AT30490_1	AT30493_1	AT30494_1	AT30495_1	AT30496_1	AT30503_1	AT30504_1	AT30505_1	AT30506_1	Scaffold_ID	Start	End	gene_name	InterPro_Annot	InterPro_GO_Terms	sma3s_name	sma3s_Annot	Full_name_Salinity	Function_Salinity	ID
1.Adra_g60147_tsc	g60147	12.2913872641734	6.02254680632109	8.13556529093258e-08	1.13366360291343e-05	0	42	0	14	0	0	2	0	14	29	0	5	1020	14158	192	203	Scaffold_2541	2931	23036	tsc	IPR004841 Amino acid permease/ SLC12A domain;IPR018491 SLC12A transporter, C-terminal	go_process:GO:0055085 transmembrane transport;go_component:GO:0016020 membrane;go_process:GO:0006811 ion transport;go_function:GO:0022857 transmembrane transporter activity	Na-Cl symporter	ion transport;potassium ion transport;sodium ion transport;chloride transport;cell volume homeostasis;sodium ion transmembrane transport;chloride ion homeostasis;potassium ion homeostasis;sodium ion homeostasis;renal sodium ion absorption;inorganic cation import across plasma membrane;chloride transmembrane transport;potassium ion import across plasma membrane	NA	NA	1.Adra_g60147_tsc
2.Adra_g67071_tsc	g67071	10.9055774634851	4.64090477484735	8.1422547566416e-07	7.77136967213202e-05	0	11	0	0	0	0	2	0	0	11	0	0	390	5419	79	72	Scaffold_2793	229403	240622	tsc	IPR018491 SLC12A transporter, C-terminal;IPR004841 Amino acid permease/ SLC12A domain	go_process:GO:0006811 ion transport;go_function:GO:0022857 transmembrane transporter activity;go_component:GO:0016020 membrane;go_process:GO:0055085 transmembrane transport	Bumetanide-sensitive sodium-(potassium)-chloride cotransporter 2	kidney development;ion transport;potassium ion transport;sodium ion transport;chloride transport;cellular sodium ion homeostasis;cell volume homeostasis;hyperosmotic response;gamma-aminobutyric acid signaling pathway;aging;excretion;T cell chemotaxis;ammonium transport;diterpenoid metabolic process;cellular potassium ion homeostasis;transepithelial chloride transport;cellular chloride ion homeost…	Bumetanide-sensitive sodium-(potassium)-chloride cotransporter 2	cellular hyperosmotic salinity response; potassium, sodium and chloride transmembrane ion transport; cellular ion homeostasis; cell volume homeostasis; hyperosmotic response	2.Adra_g67071_tsc
3.Adra_g18473	g18473	10.4515546639128	1.73531566934985	5.5029468519651e-33	2.98067116236689e-29	0	1	0	0	0	0	0	0	0	0	0	0	142	182	195	155	Scaffold_750	257144	261558	NA	IPR000477 Reverse transcriptase domain;IPR041588 Integrase zinc-binding domain;IPR001584 Integrase, catalytic core;IPR041577 Reverse transcriptase/retrotransposon-derived protein, RNase H-like domain;IPR036397 Ribonuclease H superfamily;IPR043128 Reverse transcriptase/Diguanylate cyclase domain;IPR012337 Ribonuclease H-like superfamily;IPR043502 DNA/RNA polymerase superfamily	go_process:GO:0015074 DNA integration;go_function:GO:0003676 nucleic acid binding	NA	NA	NA	NA	3.Adra_g18473
4.Adra_g15358	g15358	10.1537535763535	1.44845693836395	1.01521992824598e-05	0.000639411481551672	0	178	234	0	0	0	0	0	0	243	248	196	104	199	0	286	Scaffold_645	54306	57596	NA	IPR019761 DNA-directed RNA polymerase M, 15kDa subunit, conserved site	-	NA	NA	NA	NA	4.Adra_g15358
5.Adra_g63879	g63879	9.57319083719029	4.10934509303317	7.19868435902495e-09	1.49967976271764e-06	6	454	877	0	0	4	0	0	0	0	0	0	80	390	2402	672	Scaffold_2669	7183	10399	NA	IPR023341 MABP domain	-	NA	NA	NA	NA	5.Adra_g63879
6.Adra_g23173_tsc	g23173	9.39888973702536	4.78390362152364	1.80625879363755e-06	0.000151683732647097	0	13	0	0	0	4	0	5	11	7	3	4	476	5910	72	98	Scaffold_1030	36695	51130	tsc	IPR004841 Amino acid permease/ SLC12A domain;IPR013612 Amino acid permease, N-terminal	go_process:GO:0055085 transmembrane transport;go_component:GO:0016020 membrane	Bumetanide-sensitive sodium-(potassium)-chloride cotransporter 2	kidney development;ion transport;potassium ion transport;sodium ion transport;chloride transport;cellular sodium ion homeostasis;cell volume homeostasis;hyperosmotic response;gamma-aminobutyric acid signaling pathway;aging;excretion;T cell chemotaxis;ammonium transport;diterpenoid metabolic process;cellular potassium ion homeostasis;transepithelial chloride transport;cellular chloride ion homeost…	Bumetanide-sensitive sodium-(potassium)-chloride cotransporter 2	cellular hyperosmotic salinity response; potassium, sodium and chloride transmembrane ion transport; cellular ion homeostasis; cell volume homeostasis; hyperosmotic response	6.Adra_g23173_tsc
7.Adra_g29838	g29838	9.36094844876684	0.663284987037066	1.84217262582318e-06	0.000152921502341322	12	18	572	4	0	0	0	0	0	0	0	0	118	9	142	9	Scaffold_1340	655974	661727	NA	IPR013783 Immunoglobulin-like fold	-	NA	NA	NA	NA	7.Adra_g29838
8.Adra_g15712	g15712	8.8623046996112	4.17445491785101	1.82900198846236e-06	0.000152412142623175	6	483	1042	0	0	7	0	0	0	0	0	0	74	365	2533	731	Scaffold_669	21702	26164	NA	IPR023341 MABP domain	-	NA	NA	NA	NA	8.Adra_g15712
9.Adra_g56487	g56487	8.69766078105339	0.046840757472659	2.14172714823461e-07	2.53566450238531e-05	0	0	0	0	0	0	0	0	0	0	0	0	22	32	128	11	Scaffold_2414	139291	177526	NA	IPR000569 HECT domain;IPR035983 HECT, E3 ligase catalytic domain	go_function:GO:0004842 ubiquitin-protein transferase activity	NA	NA	NA	NA	9.Adra_g56487
10.Adra_g25695_atp4a	g25695	8.52298003631313	9.12151899517809	7.27854034560863e-23	1.75218727919952e-19	25	520	56	73	54	78	88	97	3467	3113	301	216	9845	78834	6771	34095	Scaffold_1133	3106392	3125324	atp4a	IPR004014 Cation-transporting P-type ATPase, N-terminal;IPR023214 HAD superfamily;IPR023299 P-type ATPase, cytoplasmic domain N;IPR005775 P-type ATPase subfamily IIC, subunit alpha;IPR006068 Cation-transporting P-type ATPase, C-terminal;IPR001757 P-type ATPase;IPR044492 P-type ATPase, haloacid dehalogenase domain;IPR018303 P-type ATPase, phosphorylation site;IPR023298 P-type ATPase, transmembrane…	go_function:GO:0000166 nucleotide binding;go_component:GO:0016021 integral component of membrane;go_process:GO:0006813 potassium ion transport;go_function:GO:0005524 ATP binding;go_function:GO:0008556 P-type potassium transmembrane transporter activity;go_function:GO:0016887 ATPase	Na(+)/K(+) ATPase alpha-1 subunit	neurotransmitter uptake;behavioral fear response;gastric acid secretion;tissue homeostasis;regulation of the force of heart contraction;regulation of sodium ion transport;regulation of respiratory gaseous exchange by nervous system process;cation transport;potassium ion transport;sodium ion transport;cellular sodium ion homeostasis;regulation of pH;regulation of muscle contraction;regulation of s…	NA	NA	10.Adra_g25695_atp4a
11.Adra_g72669	g72669	8.43432893086634	-0.195902769894587	1.32740039111341e-13	1.02847642700204e-10	0	1	0	0	0	0	0	0	0	0	0	0	47	33	41	41	Scaffold_3005	209643	211916	NA	IPR041588 Integrase zinc-binding domain;IPR001584 Integrase, catalytic core;IPR036397 Ribonuclease H superfamily;IPR012337 Ribonuclease H-like superfamily	go_process:GO:0015074 DNA integration;go_function:GO:0003676 nucleic acid binding	NA	NA	NA	NA	11.Adra_g72669
12.Adra_g67588	g67588	8.3714757366139	-0.251091759022426	2.99700858538935e-14	2.59732752044183e-11	0	6	0	0	0	0	0	0	0	0	0	0	38	45	43	32	Scaffold_2812	490188	494017	NA	IPR043128 Reverse transcriptase/Diguanylate cyclase domain;IPR000477 Reverse transcriptase domain;IPR041588 Integrase zinc-binding domain;IPR036397 Ribonuclease H superfamily;IPR041577 Reverse transcriptase/retrotransposon-derived protein, RNase H-like domain;IPR001584 Integrase, catalytic core;IPR043502 DNA/RNA polymerase superfamily;IPR012337 Ribonuclease H-like superfamily	go_function:GO:0003676 nucleic acid binding;go_process:GO:0015074 DNA integration	NA	NA	NA	NA	12.Adra_g67588
13.Adra_g54628	g54628	7.71265331501094	3.33232104929575	3.64049171875813e-07	3.84755578432262e-05	17	5	7	38	0	6	0	4	8	17	0	6	984	737	36	175	Scaffold_2353	944557	954245	NA	IPR023412 Ribonuclease A-domain;IPR036816 Ribonuclease A-like domain superfamily;IPR001427 Pancreatic ribonuclease;IPR023411 Ribonuclease A, active site	go_function:GO:0003676 nucleic acid binding	NA	NA	NA	NA	13.Adra_g54628
14.Adra_g37448	g37448	5.02857696447535	1.17753605044586	7.33185008302278e-06	0.000496412074683661	2	10	5	3	8	1	1	4	17	4	3	3	7	70	218	162	Scaffold_1706	536427	541802	NA	IPR036397 Ribonuclease H superfamily;IPR001584 Integrase, catalytic core;IPR012337 Ribonuclease H-like superfamily	go_function:GO:0003676 nucleic acid binding;go_process:GO:0015074 DNA integration	NA	NA	NA	NA	14.Adra_g37448
15.Adra_g35708	g35708	4.8709743007972	3.37468014556888	1.08880611090921e-05	0.000670172534061334	0	8	13	42	18	21	14	18	27	10	7	104	5	587	957	635	Scaffold_1620	3636610	3690764	NA	IPR002172 Low-density lipoprotein (LDL) receptor class A repeat;IPR000998 MAM domain;IPR036055 LDL receptor-like superfamily;IPR000742 EGF-like domain;IPR023415 Low-density lipoprotein (LDL) receptor class A, conserved site;IPR013320 Concanavalin A-like lectin/glucanase domain superfamily	go_function:GO:0005515 protein binding;go_component:GO:0016020 membrane	NA	NA	NA	NA	15.Adra_g35708
16.Adra_g15670	g15670	4.60820356108071	-0.47666378970908	7.54838843412915e-08	1.08306876697909e-05	0	7	13	39	2	2	0	1	3	2	5	1	21	64	17	34	Scaffold_664	184240	185277	NA	IPR000477 Reverse transcriptase domain;IPR043502 DNA/RNA polymerase superfamily	-	NA	NA	NA	NA	16.Adra_g15670
17.Adra_g41327_aga	g41327	4.22074616542065	6.87528429339455	7.1722509812327e-08	1.06015046728138e-05	1479	2044	3498	3035	345	53	578	193	0	43	0	16	5326	10847	3368	4192	Scaffold_1879	5071120	5077760	aga	IPR006035 Ureohydrolase;IPR014033 Arginase;IPR020855 Ureohydrolase, manganese-binding site;IPR023696 Ureohydrolase domain superfamily	go_function:GO:0046872 metal ion binding;go_process:GO:0006525 arginine metabolic process;go_function:GO:0004053 arginase activity;go_function:GO:0016813 hydrolase activity, acting on carbon-nitrogen (but not peptide) bonds, in linear amidines	Arginase-1	urea cycle;ureteric bud development;response to hypoxia;liver development;positive regulation of endothelial cell proliferation;adaptive immune response;negative regulation of type 2 immune response;arginine metabolic process;arginine catabolic process;nitric oxide biosynthetic process;striated muscle contraction;midgut development;female pregnancy;aging;response to nutrient;response to wounding;…	NA	NA	17.Adra_g41327_aga
18.Adra_g48006	g48006	4.03203734276047	-0.222007985352611	4.0995480421337e-06	0.000308405582919683	1	4	6	9	1	1	2	6	3	1	10	1	33	73	39	11	Scaffold_2111	1024531	1025217	NA	IPR015095 Alkylated DNA repair protein AlkB, homologue 8, N-terminal	go_function:GO:0016706 2-oxoglutarate-dependent dioxygenase activity;go_function:GO:0008168 methyltransferase activity	NA	NA	NA	NA	18.Adra_g48006
19.Adra_g14748_nt5c2	g14748	3.99849170591275	7.54026651424083	9.60374764826121e-10	2.85033967872914e-07	483	1706	1138	3092	372	377	473	1343	1620	901	2804	1360	3387	3142	13939	16670	Scaffold_629	2448524	2457215	nt5c2	IPR008380 HAD-superfamily hydrolase, subfamily IG, 5'-nucleotidase;IPR023214 HAD superfamily;IPR016695 Purine 5'-nucleotidase;IPR036412 HAD-like superfamily	-	Cytosolic 5'-nucleotidase II	purine nucleotide catabolic process;nucleotide metabolic process;drug metabolic process;IMP metabolic process;adenosine metabolic process	NA	NA	19.Adra_g14748_nt5c2
20.Adra_g34682	g34682	3.8509560806552	3.76761312876247	8.61718137973762e-13	5.65757126586046e-10	164	301	200	654	51	22	46	75	258	105	460	189	666	244	761	874	Scaffold_1569	16448	27029	NA	IPR006703 AIG1-type guanine nucleotide-binding (G) domain;IPR027417 P-loop containing nucleoside triphosphate hydrolase	go_function:GO:0005525 GTP binding	NA	NA	NA	NA	20.Adra_g34682
1.SPol_g10729_DCTD	g10729	-13.7355110997775	4.99193550887099	2.04877836789553e-40	1.47962773729415e-36	165	927	1669	1049	2493	1604	424	2739	0	0	0	0	0	0	0	0	Scaffold_461	78458	105936	DCTD	IPR002125 Cytidine and deoxycytidylate deaminase domain;IPR015517 Deoxycytidylate deaminase-related;IPR016192 APOBEC/CMP deaminase, zinc-binding;IPR035105 Deoxycytidylate deaminase domain;IPR016193 Cytidine deaminase-like	go_function:GO:0016787 hydrolase activity;go_function:GO:0008270 zinc ion binding;go_function:GO:0003824 catalytic activity	dCMP deaminase	pyrimidine nucleotide metabolic process;dUMP biosynthetic process;dTMP biosynthetic process;nucleotide biosynthetic process;nucleobase-containing small molecule interconversion	NA	NA	1.SPol_g10729_DCTD
2.SPol_g61520	g61520	-13.1098927055044	4.36792989184345	3.63320496770686e-83	7.87170188303368e-79	0	0	0	0	1069	674	1061	1729	0	0	372	266	0	0	0	0	Scaffold_2589	129297	141595	NA	IPR003597 Immunoglobulin C1-set;IPR037055 MHC class I-like antigen recognition-like superfamily;IPR011161 MHC class I-like antigen recognition-like;IPR013783 Immunoglobulin-like fold;IPR007110 Immunoglobulin-like domain;IPR011162 MHC classes I/II-like antigen recognition protein;IPR036179 Immunoglobulin-like domain superfamily	-	NA	NA	NA	NA	2.SPol_g61520
3.SPol_g54141_hh2b	g54141	-12.3464947539479	3.60569448549054	8.1626290987951e-08	1.13366360291343e-05	0	276	470	47	10	1421	712	81	20	3	0	3	0	0	0	0	Scaffold_2339	636859	637291	hh2b	IPR000558 Histone H2B;IPR009072 Histone-fold;IPR007125 Histone H2A/H2B/H3	go_function:GO:0003677 DNA binding;go_component:GO:0000786 nucleosome;go_function:GO:0046982 protein heterodimerization activity	Histone H2B	innate immune response in mucosa;postreplication repair;DNA packaging;chromatin organization;chromatin assembly or disassembly;nucleosome assembly;nucleosome disassembly;inflammatory response;negative regulation of tumor necrosis factor-mediated signaling pathway;protein ubiquitination;antibacterial humoral response;substantia nigra development;plasminogen activation;killing of cells of other org…	NA	NA	3.SPol_g54141_hh2b
4.SPol_g14360	g14360	-12.1581767937187	3.42106886970885	2.05222980030314e-75	2.2231805426684e-71	267	611	825	701	582	552	423	748	616	691	808	539	0	0	0	0	Scaffold_625	2344466	2348305	NA	IPR033214 A-kinase-interacting protein 1	go_process:GO:1901222 regulation of NIK/NF-kappaB signaling	NA	NA	NA	NA	4.SPol_g14360
5.SPol_g62787_CGA1	g62787	-11.1890971845901	2.45665248472746	5.25231588311157e-08	7.95780950513953e-06	0	149	222	14	16	700	250	43	0	10	0	0	0	0	0	0	Scaffold_2626	170029	181705	CGA1	IPR001019 Guanine nucleotide binding protein (G-protein), alpha subunit;IPR000469 G-protein alpha subunit, group 12/13;IPR011025 G protein alpha subunit, helical insertion;IPR027417 P-loop containing nucleoside triphosphate hydrolase	go_process:GO:0007186 G protein-coupled receptor signaling pathway;go_function:GO:0019001 guanyl nucleotide binding;go_function:GO:0031683 G-protein beta/gamma-subunit complex binding;go_function:GO:0003924 GTPase activity;go_process:GO:0007266 Rho protein signal transduction;go_function:GO:0001664 G protein-coupled receptor binding;go_process:GO:0007165 signal transduction	Adenylate cyclase-inhibiting G alpha protein	G protein-coupled adenosine receptor signaling pathway;tRNA aminoacylation for protein translation;cell cycle;G protein-coupled receptor signaling pathway;adenylate cyclase-modulating G protein-coupled receptor signaling pathway;adenylate cyclase-activating G protein-coupled receptor signaling pathway;adenylate cyclase-inhibiting G protein-coupled receptor signaling pathway;negative regulation of…	NA	NA	5.SPol_g62787_CGA1
6.SPol_g50121	g50121	-10.6352520588616	1.90980529636296	1.01999041385584e-06	9.32451996059102e-05	0	40	106	12	12	530	129	16	14	0	0	0	0	0	0	0	Scaffold_2195	806658	820471	NA	IPR015926 Cytolysin/lectin	-	NA	NA	NA	NA	6.SPol_g50121
7.SPol_g4916	g4916	-10.3292769724487	1.60888458035951	1.38989707898521e-07	1.76023720480926e-05	0	77	88	54	18	374	143	20	4	0	0	0	0	0	0	0	Scaffold_216	429875	437978	NA	IPR001507 Zona pellucida domain;IPR036397 Ribonuclease H superfamily;IPR002492 Transposase, Tc1-like;IPR042235 Zona pellucida, ZP-C domain;IPR040196 Zona pellucida sperm-binding protein 3	go_function:GO:0003676 nucleic acid binding;go_function:GO:0003677 DNA binding;go_process:GO:0015074 DNA integration;go_process:GO:0006313 transposition, DNA-mediated;go_process:GO:0035803 egg coat formation;go_function:GO:0035804 structural constituent of egg coat;go_process:GO:0007339 binding of sperm to zona pellucida	NA	NA	NA	NA	7.SPol_g4916
8.SPol_g52739	g52739	-10.2769142143704	4.88132676702872	4.19213931300132e-08	6.72791780411012e-06	0	1299	1316	185	90	2144	2754	359	118	25	3	5	0	5	0	0	Scaffold_2292	871155	871878	NA	IPR009803 Protein of unknown function DUF1373	-	NA	NA	NA	NA	8.SPol_g52739
9.SPol_g26250	g26250	-10.1740843186122	1.45464512409365	2.67470453472673e-06	0.000212271606041719	0	99	53	12	6	263	205	12	5	0	0	0	0	0	0	0	Scaffold_1152	3453476	3457355	NA	IPR015926 Cytolysin/lectin;IPR009104 Sea anemone actinoporin-like	go_process:GO:0052331 hemolysis in other organism involved in symbiotic interaction;go_function:GO:0015267 channel activity;go_process:GO:0046931 pore complex assembly;go_component:GO:0046930 pore complex;go_process:GO:0006812 cation transport	NA	NA	NA	NA	9.SPol_g26250
10.SPol_g61150	g61150	-9.92647770680986	1.2276473604166	3.20811628700688e-23	8.68838093428638e-20	61	83	154	87	128	81	67	253	0	1	0	0	0	0	0	0	Scaffold_2572	616246	617205	NA	IPR043636 L1 transposable element, RRM domain;IPR004244 Transposase, L1	-	NA	NA	NA	NA	10.SPol_g61150
11.SPol_g20623	g20623	-9.90780427932855	4.78267955679348	1.98747053809958e-06	0.000163728276343975	0	264	228	94	54	3440	1366	224	72	0	0	2	0	0	0	6	Scaffold_867	42954	43658	NA	IPR009803 Protein of unknown function DUF1373	-	NA	NA	NA	NA	11.SPol_g20623
12.SPol_g57520_G1P3	g57520	-9.85949514317099	4.01850617137192	1.61842071679188e-05	0.000945140249326493	4	1005	2631	8	2809	10	436	74	3	0	0	0	0	0	3	0	Scaffold_2452	777128	787671	G1P3	IPR009311 Interferon alpha-inducible protein IFI6/IFI27-like;IPR038213 IFI6/IFI27-like domain superfamily	go_component:GO:0016021 integral component of membrane	ISG12(b)	negative regulation of transcription by RNA polymerase II;release of cytochrome c from mitochondria;apoptotic process;immune response;aging;response to virus;viral process;regulation of epidermal growth factor receptor signaling pathway;negative regulation of apoptotic process;negative regulation of cysteine-type endopeptidase activity involved in apoptotic process;proteasome-mediated ubiquitin-d…	NA	NA	12.SPol_g57520_G1P3
13.SPol_g68242_fabp3	g68242	-9.85102866359635	4.15861466839281	7.94863489674068e-06	0.00052989268822395	0	696	925	46	22	1975	1164	72	28	7	16	4	3	0	0	0	Scaffold_2825	2034229	2035021	fabp3	IPR000463 Cytosolic fatty-acid binding;IPR012674 Calycin;IPR000566 Lipocalin/cytosolic fatty-acid binding domain;IPR031259 Intracellular lipid binding protein	go_function:GO:0008289 lipid binding	Fatty acid-binding protein 3	acrosome assembly;cytokine production;startle response;neural retina development;glucose metabolic process;negative regulation of protein kinase activity;lipid metabolic process;fatty acid metabolic process;fatty acid beta-oxidation;phosphatidylcholine biosynthetic process;positive regulation of cell population proliferation;negative regulation of cell population proliferation;epidermis developme…	NA	NA	13.SPol_g68242_fabp3
14.SPol_g59903	g59903	-9.803409958792	1.10874919775814	7.77573399668515e-10	2.37280356017156e-07	8	27	126	0	9	84	121	266	7	19	21	44	0	0	0	0	Scaffold_2534	1670046	1689087	NA	IPR013783 Immunoglobulin-like fold;IPR007110 Immunoglobulin-like domain;IPR036179 Immunoglobulin-like domain superfamily	-	NA	NA	NA	NA	14.SPol_g59903
15.SPol_g46238	g46238	-9.66751891124905	0.977632607602196	7.15702278108474e-22	1.40967323249984e-18	68	98	196	118	107	67	60	205	0	1	0	0	0	0	0	0	Scaffold_2052	924648	925652	NA	IPR043636 L1 transposable element, RRM domain;IPR004244 Transposase, L1	-	NA	NA	NA	NA	15.SPol_g46238
16.SPol_g10290	g10290	-9.64876729036649	0.946099922164998	7.46655260193235e-06	0.000502504610206991	0	32	47	25	4	280	50	18	8	3	6	0	0	0	0	0	Scaffold_442	2391123	2392766	NA	IPR011598 Myc-type, basic helix-loop-helix (bHLH) domain;IPR036638 Helix-loop-helix DNA-binding domain superfamily	go_function:GO:0046983 protein dimerization activity	NA	NA	NA	NA	16.SPol_g10290
17.SPol_g63311	g63311	-9.64057867443665	0.951628125213764	7.01500127614157e-22	1.40967323249984e-18	67	95	195	116	105	67	59	199	0	1	0	0	0	0	0	0	Scaffold_2647	129804	130808	NA	IPR043636 L1 transposable element, RRM domain;IPR004244 Transposase, L1	-	NA	NA	NA	NA	17.SPol_g63311
18.SPol_g31829	g31829	-9.60958120820214	0.922015051029936	2.02603924520798e-21	3.37662817589817e-18	68	92	184	110	100	64	59	199	0	1	0	0	0	0	0	0	Scaffold_1412	2844153	2845157	NA	IPR043636 L1 transposable element, RRM domain;IPR004244 Transposase, L1	-	NA	NA	NA	NA	18.SPol_g31829
19.SPol_g51708	g51708	-9.60862575971913	0.921162114543084	2.60516312648476e-21	4.03167602131563e-18	65	90	184	109	101	64	58	199	0	1	0	0	0	0	0	0	Scaffold_2255	163466	164470	NA	IPR043636 L1 transposable element, RRM domain;IPR004244 Transposase, L1	-	NA	NA	NA	NA	19.SPol_g51708
20.SPol_g8903	g8903	-9.59978674642971	0.912668223429882	3.51843669135367e-21	5.08202995699124e-18	65	90	167	98	103	62	58	196	0	1	0	0	0	0	0	0	Scaffold_364	2677084	2678088	NA	IPR043636 L1 transposable element, RRM domain;IPR004244 Transposase, L1	-	NA	NA	NA	NA	20.SPol_g8903

## Sheet: AdraCab
annotated_AdraCab_gill
	gene_id	logFC	logCPM	PValue	FDR	AT30482_1	AT30483_1	AT30484_1	AT30485_1	AT30487_1	AT30488_1	AT30489_1	AT30490_1	AT30493_1	AT30494_1	AT30495_1	AT30496_1	AT30503_1	AT30504_1	AT30505_1	AT30506_1	Scaffold_ID	Start	End	gene_name	InterPro_Annot	InterPro_GO_Terms	sma3s_name	sma3s_Annot	Full_name_Salinity	Function_Salinity	ID
1.Adra_g28275	g28275	12.0904274157826	3.3755097379011	9.92956475032921e-07	0.000121110516287212	0	0	0	0	0	0	0	853	0	0	0	0	0	989	330	1281	Scaffold_1285	985013	998037	NA	IPR013106 Immunoglobulin V-set domain;IPR003599 Immunoglobulin subtype;IPR003598 Immunoglobulin subtype 2;IPR013783 Immunoglobulin-like fold;IPR013270 CD47 immunoglobulin-like;IPR007110 Immunoglobulin-like domain;IPR036179 Immunoglobulin-like domain superfamily	-	NA	NA	NA	NA	1.Adra_g28275
2.Adra_g19134	g19134	10.2602950226948	1.57682371839447	8.27438590465848e-06	0.000628200868216759	0	0	0	0	112	15	201	170	152	347	244	172	102	0	236	292	Scaffold_790	4685	23374	NA	IPR029495 NACHT-associated domain;IPR041075 NOD2, winged helix domain;IPR036388 Winged helix-like DNA-binding domain superfamily;IPR032675 Leucine-rich repeat domain superfamily;IPR001611 Leucine-rich repeat;IPR007111 NACHT nucleoside triphosphatase;IPR041267 NACHT, LRR and PYD domains-containing protein, helical domain HD2;IPR009057 Homeobox-like domain superfamily	go_function:GO:0005515 protein binding	NA	NA	NA	NA	2.Adra_g19134
3.Adra_g18473	g18473	8.66682022286063	1.65752447475428	2.65772540576449e-29	9.38265659081724e-26	0	1	0	0	0	0	0	0	0	0	0	0	142	182	195	155	Scaffold_750	257144	261558	NA	IPR000477 Reverse transcriptase domain;IPR041588 Integrase zinc-binding domain;IPR001584 Integrase, catalytic core;IPR041577 Reverse transcriptase/retrotransposon-derived protein, RNase H-like domain;IPR036397 Ribonuclease H superfamily;IPR043128 Reverse transcriptase/Diguanylate cyclase domain;IPR012337 Ribonuclease H-like superfamily;IPR043502 DNA/RNA polymerase superfamily	go_process:GO:0015074 DNA integration;go_function:GO:0003676 nucleic acid binding	NA	NA	NA	NA	3.Adra_g18473
4.Adra_g56487	g56487	8.59155678113137	-0.00397035670072617	2.63969486266549e-07	3.91007108957905e-05	0	0	0	0	0	0	0	0	0	0	0	0	22	32	128	11	Scaffold_2414	139291	177526	NA	IPR000569 HECT domain;IPR035983 HECT, E3 ligase catalytic domain	go_function:GO:0004842 ubiquitin-protein transferase activity	NA	NA	NA	NA	4.Adra_g56487
5.Adra_g53354_ASB5	g53354	7.9367629671728	-0.590709036417883	1.21420449725297e-09	3.47557833254221e-07	0	0	0	0	4	21	0	48	0	12	6	21	28	14	43	39	Scaffold_2320	1026476	1032362	ASB5	IPR002110 Ankyrin repeat;IPR001496 SOCS box domain;IPR020683 Ankyrin repeat-containing domain;IPR036770 Ankyrin repeat-containing domain superfamily;IPR036036 SOCS box-like domain superfamily	go_function:GO:0005515 protein binding;go_process:GO:0035556 intracellular signal transduction	ASB-5	protein ubiquitination;intracellular signal transduction;post-translational protein modification;positive regulation of protein catabolic process	NA	NA	5.Adra_g53354_ASB5
6.Adra_g46529_vipr1	g46529	7.56456565307614	-0.907968299137969	2.04794074885973e-09	5.22644348702974e-07	0	0	0	0	9	0	0	20	0	11	0	8	19	14	29	36	Scaffold_2061	601274	626852	vipr1	IPR000832 GPCR, family 2, secretin-like;IPR015095 Alkylated DNA repair protein AlkB, homologue 8, N-terminal;IPR002284 GPCR, family 2, vasoactive intestinal peptide receptor 2;IPR017983 GPCR, family 2, secretin-like, conserved site;IPR017981 GPCR, family 2-like	go_component:GO:0016021 integral component of membrane;go_process:GO:0007186 G protein-coupled receptor signaling pathway;go_function:GO:0004930 G protein-coupled receptor activity;go_function:GO:0016706 2-oxoglutarate-dependent dioxygenase activity;go_function:GO:0008168 methyltransferase activity;go_function:GO:0004999 vasoactive intestinal polypeptide receptor activity;go_component:GO:0016020 …	GIP-R	skeletal system development;in utero embryonic development;diet induced thermogenesis;desensitization of G protein-coupled receptor signaling pathway;chondrocyte differentiation;osteoblast development;generation of precursor metabolites and energy;cellular calcium ion homeostasis;exocytosis;cell surface receptor signaling pathway;G protein-coupled receptor signaling pathway;G protein-coupled rece…	NA	NA	6.Adra_g46529_vipr1
7.Adra_g13176_H1F1	g13176	7.55375228586891	4.77391470487124	1.69979394815446e-06	0.000180025177049039	8	3	4	5	2527	3042	1866	3292	2932	4352	3404	3108	896	3310	2019	4	Scaffold_570	265148	265690	H1F1	IPR005819 Linker histone H1/H5;IPR005818 Linker histone H1/H5, domain H15;IPR036388 Winged helix-like DNA-binding domain superfamily;IPR036390 Winged helix DNA-binding domain superfamily	go_function:GO:0003677 DNA binding;go_component:GO:0000786 nucleosome;go_process:GO:0006334 nucleosome assembly	Histone H1a	negative regulation of transcription by RNA polymerase II;chromatin organization;nucleosome assembly;regulation of transcription, DNA-templated;regulation of transcription by RNA polymerase II;multicellular organism development;spermatogenesis;binding of sperm to zona pellucida;muscle organ development;nucleosome positioning;cell differentiation;chromosome condensation;positive regulation of cell…	NA	NA	7.Adra_g13176_H1F1
8.Adra_g70893	g70893	7.47931009923051	4.72274049892835	9.24403391101124e-06	0.000684640301758882	0	22	0	0	780	0	15	68	2524	2620	82	1830	774	2825	1844	610	Scaffold_2935	69359	70904	NA	IPR013106 Immunoglobulin V-set domain;IPR003599 Immunoglobulin subtype;IPR013783 Immunoglobulin-like fold;IPR007110 Immunoglobulin-like domain;IPR036179 Immunoglobulin-like domain superfamily	-	NA	NA	NA	NA	8.Adra_g70893
9.Adra_g25695_atp4a	g25695	6.93512095371521	9.01449070699337	3.6848698290775e-08	6.96901006424282e-06	25	520	56	73	54	78	88	97	3467	3113	301	216	9845	78834	6771	34095	Scaffold_1133	3106392	3125324	atp4a	IPR004014 Cation-transporting P-type ATPase, N-terminal;IPR023214 HAD superfamily;IPR023299 P-type ATPase, cytoplasmic domain N;IPR005775 P-type ATPase subfamily IIC, subunit alpha;IPR006068 Cation-transporting P-type ATPase, C-terminal;IPR001757 P-type ATPase;IPR044492 P-type ATPase, haloacid dehalogenase domain;IPR018303 P-type ATPase, phosphorylation site;IPR023298 P-type ATPase, transmembrane…	go_function:GO:0000166 nucleotide binding;go_component:GO:0016021 integral component of membrane;go_process:GO:0006813 potassium ion transport;go_function:GO:0005524 ATP binding;go_function:GO:0008556 P-type potassium transmembrane transporter activity;go_function:GO:0016887 ATPase	Na(+)/K(+) ATPase alpha-1 subunit	neurotransmitter uptake;behavioral fear response;gastric acid secretion;tissue homeostasis;regulation of the force of heart contraction;regulation of sodium ion transport;regulation of respiratory gaseous exchange by nervous system process;cation transport;potassium ion transport;sodium ion transport;cellular sodium ion homeostasis;regulation of pH;regulation of muscle contraction;regulation of s…	NA	NA	9.Adra_g25695_atp4a
10.Adra_g72669	g72669	6.63258118781724	-0.234255074452109	4.02237861140936e-11	1.57781525457172e-08	0	1	0	0	0	0	0	0	0	0	0	0	47	33	41	41	Scaffold_3005	209643	211916	NA	IPR041588 Integrase zinc-binding domain;IPR001584 Integrase, catalytic core;IPR036397 Ribonuclease H superfamily;IPR012337 Ribonuclease H-like superfamily	go_process:GO:0015074 DNA integration;go_function:GO:0003676 nucleic acid binding	NA	NA	NA	NA	10.Adra_g72669
11.Adra_g30608_tc1a	g30608	6.55845417576389	-0.342856831430094	4.01935578689117e-13	2.30102687237646e-10	0	0	1	0	17	32	0	46	31	35	47	32	23	50	39	46	Scaffold_1365	78466	84386	tc1a	IPR038717 Tc1-like transposase, DDE domain;IPR002492 Transposase, Tc1-like;IPR036397 Ribonuclease H superfamily	go_function:GO:0003677 DNA binding;go_process:GO:0015074 DNA integration;go_process:GO:0006313 transposition, DNA-mediated;go_function:GO:0003676 nucleic acid binding	Leucine-rich repeat-containing protein 35	microtubule cytoskeleton organization;transposition, DNA-mediated;tubulin complex assembly;post-chaperonin tubulin folding pathway;DNA integration	NA	NA	11.Adra_g30608_tc1a
12.Adra_g33822	g33822	6.38279440218622	0.606565219223972	1.03751286295977e-12	5.78331512189838e-10	0	0	3	0	38	0	34	36	0	0	0	0	71	147	52	52	Scaffold_1512	617308	621794	NA	IPR008361 Melanin-concentrating hormone receptor;IPR000276 G protein-coupled receptor, rhodopsin-like;IPR017452 GPCR, rhodopsin-like, 7TM	go_component:GO:0016021 integral component of membrane;go_process:GO:0007186 G protein-coupled receptor signaling pathway;go_function:GO:0004930 G protein-coupled receptor activity	NA	NA	NA	NA	12.Adra_g33822
13.Adra_g23953	g23953	6.37359012892605	0.597425521023494	1.5780778469275e-12	8.57098588554316e-10	0	0	3	0	38	0	34	36	0	0	0	0	71	147	50	52	Scaffold_1073	5382355	5386865	NA	IPR008361 Melanin-concentrating hormone receptor;IPR000276 G protein-coupled receptor, rhodopsin-like;IPR017452 GPCR, rhodopsin-like, 7TM	go_component:GO:0016021 integral component of membrane;go_process:GO:0007186 G protein-coupled receptor signaling pathway;go_function:GO:0004930 G protein-coupled receptor activity	NA	NA	NA	NA	13.Adra_g23953
14.Adra_g45758	g45758	6.23371432056122	1.85883643708438	3.32949906592536e-19	3.53348949495394e-16	0	2	4	3	348	71	47	232	257	142	29	57	75	261	139	358	Scaffold_2032	472796	474893	NA	IPR027806 Harbinger transposase-derived nuclease domain	-	NA	NA	NA	NA	14.Adra_g45758
15.Adra_g42643	g42643	6.21067980987189	0.403025867446414	1.60426207436989e-10	5.39388559671476e-08	0	0	0	3	145	43	34	122	192	109	31	76	21	88	55	125	Scaffold_1906	5196345	5198440	NA	IPR027806 Harbinger transposase-derived nuclease domain	-	NA	NA	NA	NA	15.Adra_g42643
16.Adra_g62697	g62697	5.90627099344882	1.19586107265968	6.35920876153396e-16	5.18079846103124e-13	0	1	3	3	197	44	31	158	145	89	21	41	47	162	87	219	Scaffold_2624	165725	167655	NA	IPR027806 Harbinger transposase-derived nuclease domain	-	NA	NA	NA	NA	16.Adra_g62697
17.Adra_g33786	g33786	5.74230025761009	0.824176689367436	2.30823008120316e-12	1.22232323950113e-09	0	0	6	0	3	0	15	42	0	26	33	0	72	126	103	68	Scaffold_1512	3530	4636	NA	IPR004244 Transposase, L1	-	NA	NA	NA	NA	17.Adra_g33786
18.Adra_g50491	g50491	5.57906566671895	-0.14269031326632	8.77902331834749e-09	1.95744496767617e-06	0	0	3	0	3	0	7	22	0	29	34	1	49	58	46	21	Scaffold_2203	591496	595996	NA	IPR004244 Transposase, L1	-	NA	NA	NA	NA	18.Adra_g50491
19.Adra_g18685	g18685	5.38165864826273	0.31026866430027	3.91858980816396e-12	2.02447730040315e-09	0	1	2	2	81	32	17	88	114	62	21	10	27	87	46	105	Scaffold_759	399947	404752	NA	IPR027806 Harbinger transposase-derived nuclease domain;IPR038717 Tc1-like transposase, DDE domain;IPR002492 Transposase, Tc1-like;IPR036397 Ribonuclease H superfamily	go_function:GO:0003677 DNA binding;go_process:GO:0015074 DNA integration;go_process:GO:0006313 transposition, DNA-mediated;go_function:GO:0003676 nucleic acid binding	NA	NA	NA	NA	19.Adra_g18685
20.Adra_g43070	g43070	5.28918632793353	1.04927680059697	4.11211813437351e-12	2.05306096976426e-09	0	1	6	3	165	45	26	140	134	86	28	38	40	145	74	202	Scaffold_1920	1932	12406	NA	IPR027806 Harbinger transposase-derived nuclease domain;IPR036397 Ribonuclease H superfamily	go_function:GO:0003676 nucleic acid binding	NA	NA	NA	NA	20.Adra_g43070
1.Cab_g10729_DCTD	g10729	-12.9022055725617	4.17315233621304	1.06670746278014e-45	1.12974987383045e-41	165	927	1669	1049	2493	1604	424	2739	0	0	0	0	0	0	0	0	Scaffold_461	78458	105936	DCTD	IPR002125 Cytidine and deoxycytidylate deaminase domain;IPR015517 Deoxycytidylate deaminase-related;IPR016192 APOBEC/CMP deaminase, zinc-binding;IPR035105 Deoxycytidylate deaminase domain;IPR016193 Cytidine deaminase-like	go_function:GO:0016787 hydrolase activity;go_function:GO:0008270 zinc ion binding;go_function:GO:0003824 catalytic activity	dCMP deaminase	pyrimidine nucleotide metabolic process;dUMP biosynthetic process;dTMP biosynthetic process;nucleotide biosynthetic process;nucleobase-containing small molecule interconversion	NA	NA	1.Cab_g10729_DCTD
2.Cab_g14360	g14360	-12.4097013651651	3.68096207149487	5.32849007289303e-74	1.1286807672402e-69	267	611	825	701	582	552	423	748	616	691	808	539	0	0	0	0	Scaffold_625	2344466	2348305	NA	IPR033214 A-kinase-interacting protein 1	go_process:GO:1901222 regulation of NIK/NF-kappaB signaling	NA	NA	NA	NA	2.Cab_g14360
3.Cab_g72058_smac	g72058	-10.9540666692993	2.25617610534524	8.87606966757476e-07	0.000112456711132472	14	23	1126	22	3266	64	7	0	12	25	2	9	0	0	0	0	Scaffold_2989	549726	555006	smac	IPR015142 Smac/DIABLO protein;IPR009062 Smac/DIABLO-like superfamily	go_process:GO:0006919 activation of cysteine-type endopeptidase activity involved in apoptotic process;go_component:GO:0005739 mitochondrion;go_process:GO:0006915 apoptotic process	Diablo homolog, mitochondrial	apoptotic process;activation of cysteine-type endopeptidase activity involved in apoptotic process;extrinsic apoptotic signaling pathway via death domain receptors;intrinsic apoptotic signaling pathway in response to oxidative stress;activation of cysteine-type endopeptidase activity involved in apoptotic process by cytochrome c;positive regulation of apoptotic process;neuron apoptotic process;in…	NA	NA	3.Cab_g72058_smac
4.Cab_g54141_hh2b	g54141	-10.6424782856322	1.94077725954974	1.14124063675771e-06	0.000135807635774168	0	276	470	47	10	1421	712	81	20	3	0	3	0	0	0	0	Scaffold_2339	636859	637291	hh2b	IPR000558 Histone H2B;IPR009072 Histone-fold;IPR007125 Histone H2A/H2B/H3	go_function:GO:0003677 DNA binding;go_component:GO:0000786 nucleosome;go_function:GO:0046982 protein heterodimerization activity	Histone H2B	innate immune response in mucosa;postreplication repair;DNA packaging;chromatin organization;chromatin assembly or disassembly;nucleosome assembly;nucleosome disassembly;inflammatory response;negative regulation of tumor necrosis factor-mediated signaling pathway;protein ubiquitination;antibacterial humoral response;substantia nigra development;plasminogen activation;killing of cells of other org…	NA	NA	4.Cab_g54141_hh2b
5.Cab_g54554	g54554	-10.5060601082429	5.85244777771477	1.05732956754428e-43	7.46545163324096e-40	571	1751	3859	7304	1566	11	0	0	0	0	3	0	3	0	5	0	Scaffold_2352	35338	39651	NA	IPR008803 RHD3/Sey1;IPR030383 Very large inducible GTPASE (VLIG)-type guanine nucleotide-binding (G) domain;IPR027417 P-loop containing nucleoside triphosphate hydrolase	go_function:GO:0005525 GTP binding	NA	NA	NA	NA	5.Cab_g54554
6.Cab_g60493	g60493	-10.3424732165275	1.63527975183341	4.82588840138902e-25	1.02221968118222e-21	47	65	268	302	24	83	62	24	72	0	52	49	0	0	0	0	Scaffold_2553	34779	36462	NA	IPR003598 Immunoglobulin subtype 2;IPR013106 Immunoglobulin V-set domain;IPR003599 Immunoglobulin subtype;IPR013783 Immunoglobulin-like fold;IPR007110 Immunoglobulin-like domain;IPR036179 Immunoglobulin-like domain superfamily	-	NA	NA	NA	NA	6.Cab_g60493
7.Cab_g46238	g46238	-10.1195273005727	1.40356752343049	7.56820831008523e-26	2.00387235530282e-22	68	98	196	118	107	67	60	205	0	1	0	0	0	0	0	0	Scaffold_2052	924648	925652	NA	IPR043636 L1 transposable element, RRM domain;IPR004244 Transposase, L1	-	NA	NA	NA	NA	7.Cab_g46238
8.Cab_g63311	g63311	-10.0959555583723	1.3803286140696	1.60073207325923e-25	3.76741186397523e-22	67	95	195	116	105	67	59	199	0	1	0	0	0	0	0	0	Scaffold_2647	129804	130808	NA	IPR043636 L1 transposable element, RRM domain;IPR004244 Transposase, L1	-	NA	NA	NA	NA	8.Cab_g63311
9.Cab_g31829	g31829	-10.0558231367541	1.33944972145112	1.54204278176244e-24	2.56448031607872e-21	68	92	184	110	100	64	59	199	0	1	0	0	0	0	0	0	Scaffold_1412	2844153	2845157	NA	IPR043636 L1 transposable element, RRM domain;IPR004244 Transposase, L1	-	NA	NA	NA	NA	9.Cab_g31829
10.Cab_g51708	g51708	-10.0251604347056	1.30994895683203	1.57389501034007e-24	2.56448031607872e-21	65	90	184	109	101	64	58	199	0	1	0	0	0	0	0	0	Scaffold_2255	163466	164470	NA	IPR043636 L1 transposable element, RRM domain;IPR004244 Transposase, L1	-	NA	NA	NA	NA	10.Cab_g51708
11.Cab_g8903	g8903	-9.96329974584318	1.2469335502005	5.07680839027339e-23	7.1691303548514e-20	65	90	167	98	103	62	58	196	0	1	0	0	0	0	0	0	Scaffold_364	2677084	2678088	NA	IPR043636 L1 transposable element, RRM domain;IPR004244 Transposase, L1	-	NA	NA	NA	NA	11.Cab_g8903
12.Cab_g61150	g61150	-9.84710881671354	1.13146362726298	1.72953510600268e-21	2.15500074207935e-18	61	83	154	87	128	81	67	253	0	1	0	0	0	0	0	0	Scaffold_2572	616246	617205	NA	IPR043636 L1 transposable element, RRM domain;IPR004244 Transposase, L1	-	NA	NA	NA	NA	12.Cab_g61150
13.Cab_g62787_CGA1	g62787	-9.63788145610387	0.962719450148061	1.04566684183537e-05	0.000753612055568748	0	149	222	14	16	700	250	43	0	10	0	0	0	0	0	0	Scaffold_2626	170029	181705	CGA1	IPR001019 Guanine nucleotide binding protein (G-protein), alpha subunit;IPR000469 G-protein alpha subunit, group 12/13;IPR011025 G protein alpha subunit, helical insertion;IPR027417 P-loop containing nucleoside triphosphate hydrolase	go_process:GO:0007186 G protein-coupled receptor signaling pathway;go_function:GO:0019001 guanyl nucleotide binding;go_function:GO:0031683 G-protein beta/gamma-subunit complex binding;go_function:GO:0003924 GTPase activity;go_process:GO:0007266 Rho protein signal transduction;go_function:GO:0001664 G protein-coupled receptor binding;go_process:GO:0007165 signal transduction	Adenylate cyclase-inhibiting G alpha protein	G protein-coupled adenosine receptor signaling pathway;tRNA aminoacylation for protein translation;cell cycle;G protein-coupled receptor signaling pathway;adenylate cyclase-modulating G protein-coupled receptor signaling pathway;adenylate cyclase-activating G protein-coupled receptor signaling pathway;adenylate cyclase-inhibiting G protein-coupled receptor signaling pathway;negative regulation of…	NA	NA	13.Cab_g62787_CGA1
14.Cab_g32533_FTHFD	g32533	-9.15581241104347	0.463490364761159	1.22452246013099e-15	9.60660546314617e-13	31	58	40	127	63	34	33	37	15	17	10	22	0	0	0	0	Scaffold_1437	587116	595882	FTHFD	NA	-	10-FTHFDH	one-carbon metabolic process;biosynthetic process;10-formyltetrahydrofolate catabolic process;bile acid signaling pathway;tetrahydrofolate biosynthetic process;folic acid metabolic process	NA	NA	14.Cab_g32533_FTHFD
15.Cab_g4916	g4916	-8.7724968105571	0.144008967046799	1.83600792823272e-06	0.000191532135168889	0	77	88	54	18	374	143	20	4	0	0	0	0	0	0	0	Scaffold_216	429875	437978	NA	IPR001507 Zona pellucida domain;IPR036397 Ribonuclease H superfamily;IPR002492 Transposase, Tc1-like;IPR042235 Zona pellucida, ZP-C domain;IPR040196 Zona pellucida sperm-binding protein 3	go_function:GO:0003676 nucleic acid binding;go_function:GO:0003677 DNA binding;go_process:GO:0015074 DNA integration;go_process:GO:0006313 transposition, DNA-mediated;go_process:GO:0035803 egg coat formation;go_function:GO:0035804 structural constituent of egg coat;go_process:GO:0007339 binding of sperm to zona pellucida	NA	NA	NA	NA	15.Cab_g4916
16.Cab_g16493	g16493	-8.69619890911103	0.0710206975213626	2.00007834361518e-06	0.000202298785780269	0	76	74	56	0	1576	86	37	11	5	0	9	0	0	0	0	Scaffold_691	3163485	3185009	NA	IPR001507 Zona pellucida domain;IPR000519 P-type trefoil domain;IPR042235 Zona pellucida, ZP-C domain;IPR017957 P-type trefoil, conserved site	-	NA	NA	NA	NA	16.Cab_g16493
17.Cab_g2359_DIA4	g2359	-8.01783297412981	3.21474910220986	1.40162913714656e-06	0.00015876635498951	2	873	848	60	23	2177	1447	130	80	16	0	3	0	4	2	2	Scaffold_113	921008	921820	DIA4	IPR029039 Flavoprotein-like superfamily;IPR003680 Flavodoxin-like fold	-	Azoreductase	response to ischemia;NADH oxidation;regulation of cellular amino acid metabolic process;superoxide metabolic process;xenobiotic metabolic process;nitric oxide biosynthetic process;response to oxidative stress;synaptic transmission, cholinergic;aging;response to nutrient;memory;response to xenobiotic stimulus;response to toxic substance;response to hormone;response to carbohydrate;response to orga…	NA	NA	17.Cab_g2359_DIA4
18.Cab_g70910	g70910	-8.00777581469071	-0.543369396874202	4.68554046939207e-06	0.000395414813636107	0	38	33	66	0	0	2	79	12	18	0	0	0	0	0	0	Scaffold_2935	254702	258123	NA	IPR003599 Immunoglobulin subtype;IPR003598 Immunoglobulin subtype 2;IPR013106 Immunoglobulin V-set domain;IPR013783 Immunoglobulin-like fold;IPR007110 Immunoglobulin-like domain;IPR036179 Immunoglobulin-like domain superfamily	-	NA	NA	NA	NA	18.Cab_g70910
19.Cab_g56939_tdrd7	g56939	-7.97422671650601	-0.742667742271948	4.35481572561059e-06	0.000376504925305647	28	7	49	6	0	398	65	10	8	0	0	0	0	0	0	0	Scaffold_2430	753759	760347	tdrd7	IPR002999 Tudor domain;IPR035437 SNase-like, OB-fold superfamily	-	Tudor domain-containing protein 7	lens morphogenesis in camera-type eye;germ cell development;spermatogenesis;posttranscriptional regulation of gene expression;P granule organization;lens fiber cell differentiation	NA	NA	19.Cab_g56939_tdrd7
20.Cab_g16377_GRHPR	g16377	-7.92787758497723	2.63716933247024	1.92030590976637e-15	1.45271142073826e-12	120	289	607	143	677	69	0	0	13	31	0	0	0	0	5	0	Scaffold_691	596847	601944	GRHPR	IPR006140 D-isomer specific 2-hydroxyacid dehydrogenase, NAD-binding domain;IPR006139 D-isomer specific 2-hydroxyacid dehydrogenase, catalytic domain;IPR029752 D-isomer specific 2-hydroxyacid dehydrogenase, NAD-binding domain conserved site 1;IPR029753 D-isomer specific 2-hydroxyacid dehydrogenase, NAD-binding domain conserved site;IPR036291 NAD(P)-binding domain superfamily	go_function:GO:0051287 NAD binding;go_function:GO:0016616 oxidoreductase activity, acting on the CH-OH group of donors, NAD or NADP as acceptor	Glyoxylate reductase/hydroxypyruvate reductase	excretion;cellular nitrogen compound metabolic process;dicarboxylic acid metabolic process;oxidation-reduction process;glyoxylate metabolic process	NA	NA	20.Cab_g16377_GRHPR

## Sheet: CabMarch
annotated_CabMarch_gill
	gene_id	logFC	logCPM	PValue	FDR	AT30482_1	AT30483_1	AT30484_1	AT30485_1	AT30487_1	AT30488_1	AT30489_1	AT30490_1	AT30493_1	AT30494_1	AT30495_1	AT30496_1	AT30503_1	AT30504_1	AT30505_1	AT30506_1	Scaffold_ID	Start	End	gene_name	InterPro_Annot	InterPro_GO_Terms	sma3s_name	sma3s_Annot	Full_name_Salinity	Function_Salinity	ID
1.Adra_g60147_tsc	g60147	12.2913872641734	6.02254680632109	8.13556529093258e-08	1.13366360291343e-05	0	42	0	14	0	0	2	0	14	29	0	5	1020	14158	192	203	Scaffold_2541	2931	23036	tsc	IPR004841 Amino acid permease/ SLC12A domain;IPR018491 SLC12A transporter, C-terminal	go_process:GO:0055085 transmembrane transport;go_component:GO:0016020 membrane;go_process:GO:0006811 ion transport;go_function:GO:0022857 transmembrane transporter activity	Na-Cl symporter	ion transport;potassium ion transport;sodium ion transport;chloride transport;cell volume homeostasis;sodium ion transmembrane transport;chloride ion homeostasis;potassium ion homeostasis;sodium ion homeostasis;renal sodium ion absorption;inorganic cation import across plasma membrane;chloride transmembrane transport;potassium ion import across plasma membrane	NA	NA	1.Adra_g60147_tsc
2.Adra_g67071_tsc	g67071	10.9055774634851	4.64090477484735	8.1422547566416e-07	7.77136967213202e-05	0	11	0	0	0	0	2	0	0	11	0	0	390	5419	79	72	Scaffold_2793	229403	240622	tsc	IPR018491 SLC12A transporter, C-terminal;IPR004841 Amino acid permease/ SLC12A domain	go_process:GO:0006811 ion transport;go_function:GO:0022857 transmembrane transporter activity;go_component:GO:0016020 membrane;go_process:GO:0055085 transmembrane transport	Bumetanide-sensitive sodium-(potassium)-chloride cotransporter 2	kidney development;ion transport;potassium ion transport;sodium ion transport;chloride transport;cellular sodium ion homeostasis;cell volume homeostasis;hyperosmotic response;gamma-aminobutyric acid signaling pathway;aging;excretion;T cell chemotaxis;ammonium transport;diterpenoid metabolic process;cellular potassium ion homeostasis;transepithelial chloride transport;cellular chloride ion homeost…	Bumetanide-sensitive sodium-(potassium)-chloride cotransporter 2	cellular hyperosmotic salinity response; potassium, sodium and chloride transmembrane ion transport; cellular ion homeostasis; cell volume homeostasis; hyperosmotic response	2.Adra_g67071_tsc
3.Adra_g18473	g18473	10.4515546639128	1.73531566934985	5.5029468519651e-33	2.98067116236689e-29	0	1	0	0	0	0	0	0	0	0	0	0	142	182	195	155	Scaffold_750	257144	261558	NA	IPR000477 Reverse transcriptase domain;IPR041588 Integrase zinc-binding domain;IPR001584 Integrase, catalytic core;IPR041577 Reverse transcriptase/retrotransposon-derived protein, RNase H-like domain;IPR036397 Ribonuclease H superfamily;IPR043128 Reverse transcriptase/Diguanylate cyclase domain;IPR012337 Ribonuclease H-like superfamily;IPR043502 DNA/RNA polymerase superfamily	go_process:GO:0015074 DNA integration;go_function:GO:0003676 nucleic acid binding	NA	NA	NA	NA	3.Adra_g18473
4.Adra_g15358	g15358	10.1537535763535	1.44845693836395	1.01521992824598e-05	0.000639411481551672	0	178	234	0	0	0	0	0	0	243	248	196	104	199	0	286	Scaffold_645	54306	57596	NA	IPR019761 DNA-directed RNA polymerase M, 15kDa subunit, conserved site	-	NA	NA	NA	NA	4.Adra_g15358
5.Adra_g63879	g63879	9.57319083719029	4.10934509303317	7.19868435902495e-09	1.49967976271764e-06	6	454	877	0	0	4	0	0	0	0	0	0	80	390	2402	672	Scaffold_2669	7183	10399	NA	IPR023341 MABP domain	-	NA	NA	NA	NA	5.Adra_g63879
6.Adra_g23173_tsc	g23173	9.39888973702536	4.78390362152364	1.80625879363755e-06	0.000151683732647097	0	13	0	0	0	4	0	5	11	7	3	4	476	5910	72	98	Scaffold_1030	36695	51130	tsc	IPR004841 Amino acid permease/ SLC12A domain;IPR013612 Amino acid permease, N-terminal	go_process:GO:0055085 transmembrane transport;go_component:GO:0016020 membrane	Bumetanide-sensitive sodium-(potassium)-chloride cotransporter 2	kidney development;ion transport;potassium ion transport;sodium ion transport;chloride transport;cellular sodium ion homeostasis;cell volume homeostasis;hyperosmotic response;gamma-aminobutyric acid signaling pathway;aging;excretion;T cell chemotaxis;ammonium transport;diterpenoid metabolic process;cellular potassium ion homeostasis;transepithelial chloride transport;cellular chloride ion homeost…	Bumetanide-sensitive sodium-(potassium)-chloride cotransporter 2	cellular hyperosmotic salinity response; potassium, sodium and chloride transmembrane ion transport; cellular ion homeostasis; cell volume homeostasis; hyperosmotic response	6.Adra_g23173_tsc
7.Adra_g29838	g29838	9.36094844876684	0.663284987037066	1.84217262582318e-06	0.000152921502341322	12	18	572	4	0	0	0	0	0	0	0	0	118	9	142	9	Scaffold_1340	655974	661727	NA	IPR013783 Immunoglobulin-like fold	-	NA	NA	NA	NA	7.Adra_g29838
8.Adra_g15712	g15712	8.8623046996112	4.17445491785101	1.82900198846236e-06	0.000152412142623175	6	483	1042	0	0	7	0	0	0	0	0	0	74	365	2533	731	Scaffold_669	21702	26164	NA	IPR023341 MABP domain	-	NA	NA	NA	NA	8.Adra_g15712
9.Adra_g56487	g56487	8.69766078105339	0.046840757472659	2.14172714823461e-07	2.53566450238531e-05	0	0	0	0	0	0	0	0	0	0	0	0	22	32	128	11	Scaffold_2414	139291	177526	NA	IPR000569 HECT domain;IPR035983 HECT, E3 ligase catalytic domain	go_function:GO:0004842 ubiquitin-protein transferase activity	NA	NA	NA	NA	9.Adra_g56487
10.Adra_g25695_atp4a	g25695	8.52298003631313	9.12151899517809	7.27854034560863e-23	1.75218727919952e-19	25	520	56	73	54	78	88	97	3467	3113	301	216	9845	78834	6771	34095	Scaffold_1133	3106392	3125324	atp4a	IPR004014 Cation-transporting P-type ATPase, N-terminal;IPR023214 HAD superfamily;IPR023299 P-type ATPase, cytoplasmic domain N;IPR005775 P-type ATPase subfamily IIC, subunit alpha;IPR006068 Cation-transporting P-type ATPase, C-terminal;IPR001757 P-type ATPase;IPR044492 P-type ATPase, haloacid dehalogenase domain;IPR018303 P-type ATPase, phosphorylation site;IPR023298 P-type ATPase, transmembrane…	go_function:GO:0000166 nucleotide binding;go_component:GO:0016021 integral component of membrane;go_process:GO:0006813 potassium ion transport;go_function:GO:0005524 ATP binding;go_function:GO:0008556 P-type potassium transmembrane transporter activity;go_function:GO:0016887 ATPase	Na(+)/K(+) ATPase alpha-1 subunit	neurotransmitter uptake;behavioral fear response;gastric acid secretion;tissue homeostasis;regulation of the force of heart contraction;regulation of sodium ion transport;regulation of respiratory gaseous exchange by nervous system process;cation transport;potassium ion transport;sodium ion transport;cellular sodium ion homeostasis;regulation of pH;regulation of muscle contraction;regulation of s…	NA	NA	10.Adra_g25695_atp4a
11.Adra_g72669	g72669	8.43432893086634	-0.195902769894587	1.32740039111341e-13	1.02847642700204e-10	0	1	0	0	0	0	0	0	0	0	0	0	47	33	41	41	Scaffold_3005	209643	211916	NA	IPR041588 Integrase zinc-binding domain;IPR001584 Integrase, catalytic core;IPR036397 Ribonuclease H superfamily;IPR012337 Ribonuclease H-like superfamily	go_process:GO:0015074 DNA integration;go_function:GO:0003676 nucleic acid binding	NA	NA	NA	NA	11.Adra_g72669
12.Adra_g67588	g67588	8.3714757366139	-0.251091759022426	2.99700858538935e-14	2.59732752044183e-11	0	6	0	0	0	0	0	0	0	0	0	0	38	45	43	32	Scaffold_2812	490188	494017	NA	IPR043128 Reverse transcriptase/Diguanylate cyclase domain;IPR000477 Reverse transcriptase domain;IPR041588 Integrase zinc-binding domain;IPR036397 Ribonuclease H superfamily;IPR041577 Reverse transcriptase/retrotransposon-derived protein, RNase H-like domain;IPR001584 Integrase, catalytic core;IPR043502 DNA/RNA polymerase superfamily;IPR012337 Ribonuclease H-like superfamily	go_function:GO:0003676 nucleic acid binding;go_process:GO:0015074 DNA integration	NA	NA	NA	NA	12.Adra_g67588
13.Adra_g54628	g54628	7.71265331501094	3.33232104929575	3.64049171875813e-07	3.84755578432262e-05	17	5	7	38	0	6	0	4	8	17	0	6	984	737	36	175	Scaffold_2353	944557	954245	NA	IPR023412 Ribonuclease A-domain;IPR036816 Ribonuclease A-like domain superfamily;IPR001427 Pancreatic ribonuclease;IPR023411 Ribonuclease A, active site	go_function:GO:0003676 nucleic acid binding	NA	NA	NA	NA	13.Adra_g54628
14.Adra_g37448	g37448	5.02857696447535	1.17753605044586	7.33185008302278e-06	0.000496412074683661	2	10	5	3	8	1	1	4	17	4	3	3	7	70	218	162	Scaffold_1706	536427	541802	NA	IPR036397 Ribonuclease H superfamily;IPR001584 Integrase, catalytic core;IPR012337 Ribonuclease H-like superfamily	go_function:GO:0003676 nucleic acid binding;go_process:GO:0015074 DNA integration	NA	NA	NA	NA	14.Adra_g37448
15.Adra_g35708	g35708	4.8709743007972	3.37468014556888	1.08880611090921e-05	0.000670172534061334	0	8	13	42	18	21	14	18	27	10	7	104	5	587	957	635	Scaffold_1620	3636610	3690764	NA	IPR002172 Low-density lipoprotein (LDL) receptor class A repeat;IPR000998 MAM domain;IPR036055 LDL receptor-like superfamily;IPR000742 EGF-like domain;IPR023415 Low-density lipoprotein (LDL) receptor class A, conserved site;IPR013320 Concanavalin A-like lectin/glucanase domain superfamily	go_function:GO:0005515 protein binding;go_component:GO:0016020 membrane	NA	NA	NA	NA	15.Adra_g35708
16.Adra_g15670	g15670	4.60820356108071	-0.47666378970908	7.54838843412915e-08	1.08306876697909e-05	0	7	13	39	2	2	0	1	3	2	5	1	21	64	17	34	Scaffold_664	184240	185277	NA	IPR000477 Reverse transcriptase domain;IPR043502 DNA/RNA polymerase superfamily	-	NA	NA	NA	NA	16.Adra_g15670
17.Adra_g41327_aga	g41327	4.22074616542065	6.87528429339455	7.1722509812327e-08	1.06015046728138e-05	1479	2044	3498	3035	345	53	578	193	0	43	0	16	5326	10847	3368	4192	Scaffold_1879	5071120	5077760	aga	IPR006035 Ureohydrolase;IPR014033 Arginase;IPR020855 Ureohydrolase, manganese-binding site;IPR023696 Ureohydrolase domain superfamily	go_function:GO:0046872 metal ion binding;go_process:GO:0006525 arginine metabolic process;go_function:GO:0004053 arginase activity;go_function:GO:0016813 hydrolase activity, acting on carbon-nitrogen (but not peptide) bonds, in linear amidines	Arginase-1	urea cycle;ureteric bud development;response to hypoxia;liver development;positive regulation of endothelial cell proliferation;adaptive immune response;negative regulation of type 2 immune response;arginine metabolic process;arginine catabolic process;nitric oxide biosynthetic process;striated muscle contraction;midgut development;female pregnancy;aging;response to nutrient;response to wounding;…	NA	NA	17.Adra_g41327_aga
18.Adra_g48006	g48006	4.03203734276047	-0.222007985352611	4.0995480421337e-06	0.000308405582919683	1	4	6	9	1	1	2	6	3	1	10	1	33	73	39	11	Scaffold_2111	1024531	1025217	NA	IPR015095 Alkylated DNA repair protein AlkB, homologue 8, N-terminal	go_function:GO:0016706 2-oxoglutarate-dependent dioxygenase activity;go_function:GO:0008168 methyltransferase activity	NA	NA	NA	NA	18.Adra_g48006
19.Adra_g14748_nt5c2	g14748	3.99849170591275	7.54026651424083	9.60374764826121e-10	2.85033967872914e-07	483	1706	1138	3092	372	377	473	1343	1620	901	2804	1360	3387	3142	13939	16670	Scaffold_629	2448524	2457215	nt5c2	IPR008380 HAD-superfamily hydrolase, subfamily IG, 5'-nucleotidase;IPR023214 HAD superfamily;IPR016695 Purine 5'-nucleotidase;IPR036412 HAD-like superfamily	-	Cytosolic 5'-nucleotidase II	purine nucleotide catabolic process;nucleotide metabolic process;drug metabolic process;IMP metabolic process;adenosine metabolic process	NA	NA	19.Adra_g14748_nt5c2
20.Adra_g34682	g34682	3.8509560806552	3.76761312876247	8.61718137973762e-13	5.65757126586046e-10	164	301	200	654	51	22	46	75	258	105	460	189	666	244	761	874	Scaffold_1569	16448	27029	NA	IPR006703 AIG1-type guanine nucleotide-binding (G) domain;IPR027417 P-loop containing nucleoside triphosphate hydrolase	go_function:GO:0005525 GTP binding	NA	NA	NA	NA	20.Adra_g34682
1.SPol_g10729_DCTD	g10729	-13.7355110997775	4.99193550887099	2.04877836789553e-40	1.47962773729415e-36	165	927	1669	1049	2493	1604	424	2739	0	0	0	0	0	0	0	0	Scaffold_461	78458	105936	DCTD	IPR002125 Cytidine and deoxycytidylate deaminase domain;IPR015517 Deoxycytidylate deaminase-related;IPR016192 APOBEC/CMP deaminase, zinc-binding;IPR035105 Deoxycytidylate deaminase domain;IPR016193 Cytidine deaminase-like	go_function:GO:0016787 hydrolase activity;go_function:GO:0008270 zinc ion binding;go_function:GO:0003824 catalytic activity	dCMP deaminase	pyrimidine nucleotide metabolic process;dUMP biosynthetic process;dTMP biosynthetic process;nucleotide biosynthetic process;nucleobase-containing small molecule interconversion	NA	NA	1.SPol_g10729_DCTD
2.SPol_g61520	g61520	-13.1098927055044	4.36792989184345	3.63320496770686e-83	7.87170188303368e-79	0	0	0	0	1069	674	1061	1729	0	0	372	266	0	0	0	0	Scaffold_2589	129297	141595	NA	IPR003597 Immunoglobulin C1-set;IPR037055 MHC class I-like antigen recognition-like superfamily;IPR011161 MHC class I-like antigen recognition-like;IPR013783 Immunoglobulin-like fold;IPR007110 Immunoglobulin-like domain;IPR011162 MHC classes I/II-like antigen recognition protein;IPR036179 Immunoglobulin-like domain superfamily	-	NA	NA	NA	NA	2.SPol_g61520
3.SPol_g54141_hh2b	g54141	-12.3464947539479	3.60569448549054	8.1626290987951e-08	1.13366360291343e-05	0	276	470	47	10	1421	712	81	20	3	0	3	0	0	0	0	Scaffold_2339	636859	637291	hh2b	IPR000558 Histone H2B;IPR009072 Histone-fold;IPR007125 Histone H2A/H2B/H3	go_function:GO:0003677 DNA binding;go_component:GO:0000786 nucleosome;go_function:GO:0046982 protein heterodimerization activity	Histone H2B	innate immune response in mucosa;postreplication repair;DNA packaging;chromatin organization;chromatin assembly or disassembly;nucleosome assembly;nucleosome disassembly;inflammatory response;negative regulation of tumor necrosis factor-mediated signaling pathway;protein ubiquitination;antibacterial humoral response;substantia nigra development;plasminogen activation;killing of cells of other org…	NA	NA	3.SPol_g54141_hh2b
4.SPol_g14360	g14360	-12.1581767937187	3.42106886970885	2.05222980030314e-75	2.2231805426684e-71	267	611	825	701	582	552	423	748	616	691	808	539	0	0	0	0	Scaffold_625	2344466	2348305	NA	IPR033214 A-kinase-interacting protein 1	go_process:GO:1901222 regulation of NIK/NF-kappaB signaling	NA	NA	NA	NA	4.SPol_g14360
5.SPol_g62787_CGA1	g62787	-11.1890971845901	2.45665248472746	5.25231588311157e-08	7.95780950513953e-06	0	149	222	14	16	700	250	43	0	10	0	0	0	0	0	0	Scaffold_2626	170029	181705	CGA1	IPR001019 Guanine nucleotide binding protein (G-protein), alpha subunit;IPR000469 G-protein alpha subunit, group 12/13;IPR011025 G protein alpha subunit, helical insertion;IPR027417 P-loop containing nucleoside triphosphate hydrolase	go_process:GO:0007186 G protein-coupled receptor signaling pathway;go_function:GO:0019001 guanyl nucleotide binding;go_function:GO:0031683 G-protein beta/gamma-subunit complex binding;go_function:GO:0003924 GTPase activity;go_process:GO:0007266 Rho protein signal transduction;go_function:GO:0001664 G protein-coupled receptor binding;go_process:GO:0007165 signal transduction	Adenylate cyclase-inhibiting G alpha protein	G protein-coupled adenosine receptor signaling pathway;tRNA aminoacylation for protein translation;cell cycle;G protein-coupled receptor signaling pathway;adenylate cyclase-modulating G protein-coupled receptor signaling pathway;adenylate cyclase-activating G protein-coupled receptor signaling pathway;adenylate cyclase-inhibiting G protein-coupled receptor signaling pathway;negative regulation of…	NA	NA	5.SPol_g62787_CGA1
6.SPol_g50121	g50121	-10.6352520588616	1.90980529636296	1.01999041385584e-06	9.32451996059102e-05	0	40	106	12	12	530	129	16	14	0	0	0	0	0	0	0	Scaffold_2195	806658	820471	NA	IPR015926 Cytolysin/lectin	-	NA	NA	NA	NA	6.SPol_g50121
7.SPol_g4916	g4916	-10.3292769724487	1.60888458035951	1.38989707898521e-07	1.76023720480926e-05	0	77	88	54	18	374	143	20	4	0	0	0	0	0	0	0	Scaffold_216	429875	437978	NA	IPR001507 Zona pellucida domain;IPR036397 Ribonuclease H superfamily;IPR002492 Transposase, Tc1-like;IPR042235 Zona pellucida, ZP-C domain;IPR040196 Zona pellucida sperm-binding protein 3	go_function:GO:0003676 nucleic acid binding;go_function:GO:0003677 DNA binding;go_process:GO:0015074 DNA integration;go_process:GO:0006313 transposition, DNA-mediated;go_process:GO:0035803 egg coat formation;go_function:GO:0035804 structural constituent of egg coat;go_process:GO:0007339 binding of sperm to zona pellucida	NA	NA	NA	NA	7.SPol_g4916
8.SPol_g52739	g52739	-10.2769142143704	4.88132676702872	4.19213931300132e-08	6.72791780411012e-06	0	1299	1316	185	90	2144	2754	359	118	25	3	5	0	5	0	0	Scaffold_2292	871155	871878	NA	IPR009803 Protein of unknown function DUF1373	-	NA	NA	NA	NA	8.SPol_g52739
9.SPol_g26250	g26250	-10.1740843186122	1.45464512409365	2.67470453472673e-06	0.000212271606041719	0	99	53	12	6	263	205	12	5	0	0	0	0	0	0	0	Scaffold_1152	3453476	3457355	NA	IPR015926 Cytolysin/lectin;IPR009104 Sea anemone actinoporin-like	go_process:GO:0052331 hemolysis in other organism involved in symbiotic interaction;go_function:GO:0015267 channel activity;go_process:GO:0046931 pore complex assembly;go_component:GO:0046930 pore complex;go_process:GO:0006812 cation transport	NA	NA	NA	NA	9.SPol_g26250
10.SPol_g61150	g61150	-9.92647770680986	1.2276473604166	3.20811628700688e-23	8.68838093428638e-20	61	83	154	87	128	81	67	253	0	1	0	0	0	0	0	0	Scaffold_2572	616246	617205	NA	IPR043636 L1 transposable element, RRM domain;IPR004244 Transposase, L1	-	NA	NA	NA	NA	10.SPol_g61150
11.SPol_g20623	g20623	-9.90780427932855	4.78267955679348	1.98747053809958e-06	0.000163728276343975	0	264	228	94	54	3440	1366	224	72	0	0	2	0	0	0	6	Scaffold_867	42954	43658	NA	IPR009803 Protein of unknown function DUF1373	-	NA	NA	NA	NA	11.SPol_g20623
12.SPol_g57520_G1P3	g57520	-9.85949514317099	4.01850617137192	1.61842071679188e-05	0.000945140249326493	4	1005	2631	8	2809	10	436	74	3	0	0	0	0	0	3	0	Scaffold_2452	777128	787671	G1P3	IPR009311 Interferon alpha-inducible protein IFI6/IFI27-like;IPR038213 IFI6/IFI27-like domain superfamily	go_component:GO:0016021 integral component of membrane	ISG12(b)	negative regulation of transcription by RNA polymerase II;release of cytochrome c from mitochondria;apoptotic process;immune response;aging;response to virus;viral process;regulation of epidermal growth factor receptor signaling pathway;negative regulation of apoptotic process;negative regulation of cysteine-type endopeptidase activity involved in apoptotic process;proteasome-mediated ubiquitin-d…	NA	NA	12.SPol_g57520_G1P3
13.SPol_g68242_fabp3	g68242	-9.85102866359635	4.15861466839281	7.94863489674068e-06	0.00052989268822395	0	696	925	46	22	1975	1164	72	28	7	16	4	3	0	0	0	Scaffold_2825	2034229	2035021	fabp3	IPR000463 Cytosolic fatty-acid binding;IPR012674 Calycin;IPR000566 Lipocalin/cytosolic fatty-acid binding domain;IPR031259 Intracellular lipid binding protein	go_function:GO:0008289 lipid binding	Fatty acid-binding protein 3	acrosome assembly;cytokine production;startle response;neural retina development;glucose metabolic process;negative regulation of protein kinase activity;lipid metabolic process;fatty acid metabolic process;fatty acid beta-oxidation;phosphatidylcholine biosynthetic process;positive regulation of cell population proliferation;negative regulation of cell population proliferation;epidermis developme…	NA	NA	13.SPol_g68242_fabp3
14.SPol_g59903	g59903	-9.803409958792	1.10874919775814	7.77573399668515e-10	2.37280356017156e-07	8	27	126	0	9	84	121	266	7	19	21	44	0	0	0	0	Scaffold_2534	1670046	1689087	NA	IPR013783 Immunoglobulin-like fold;IPR007110 Immunoglobulin-like domain;IPR036179 Immunoglobulin-like domain superfamily	-	NA	NA	NA	NA	14.SPol_g59903
15.SPol_g46238	g46238	-9.66751891124905	0.977632607602196	7.15702278108474e-22	1.40967323249984e-18	68	98	196	118	107	67	60	205	0	1	0	0	0	0	0	0	Scaffold_2052	924648	925652	NA	IPR043636 L1 transposable element, RRM domain;IPR004244 Transposase, L1	-	NA	NA	NA	NA	15.SPol_g46238
16.SPol_g10290	g10290	-9.64876729036649	0.946099922164998	7.46655260193235e-06	0.000502504610206991	0	32	47	25	4	280	50	18	8	3	6	0	0	0	0	0	Scaffold_442	2391123	2392766	NA	IPR011598 Myc-type, basic helix-loop-helix (bHLH) domain;IPR036638 Helix-loop-helix DNA-binding domain superfamily	go_function:GO:0046983 protein dimerization activity	NA	NA	NA	NA	16.SPol_g10290
17.SPol_g63311	g63311	-9.64057867443665	0.951628125213764	7.01500127614157e-22	1.40967323249984e-18	67	95	195	116	105	67	59	199	0	1	0	0	0	0	0	0	Scaffold_2647	129804	130808	NA	IPR043636 L1 transposable element, RRM domain;IPR004244 Transposase, L1	-	NA	NA	NA	NA	17.SPol_g63311
18.SPol_g31829	g31829	-9.60958120820214	0.922015051029936	2.02603924520798e-21	3.37662817589817e-18	68	92	184	110	100	64	59	199	0	1	0	0	0	0	0	0	Scaffold_1412	2844153	2845157	NA	IPR043636 L1 transposable element, RRM domain;IPR004244 Transposase, L1	-	NA	NA	NA	NA	18.SPol_g31829
19.SPol_g51708	g51708	-9.60862575971913	0.921162114543084	2.60516312648476e-21	4.03167602131563e-18	65	90	184	109	101	64	58	199	0	1	0	0	0	0	0	0	Scaffold_2255	163466	164470	NA	IPR043636 L1 transposable element, RRM domain;IPR004244 Transposase, L1	-	NA	NA	NA	NA	19.SPol_g51708
20.SPol_g8903	g8903	-9.59978674642971	0.912668223429882	3.51843669135367e-21	5.08202995699124e-18	65	90	167	98	103	62	58	196	0	1	0	0	0	0	0	0	Scaffold_364	2677084	2678088	NA	IPR043636 L1 transposable element, RRM domain;IPR004244 Transposase, L1	-	NA	NA	NA	NA	20.SPol_g8903

## Sheet: CabSPol
annotated_CabSPol_gill
	gene_id	logFC	logCPM	PValue	FDR	AT30482_1	AT30483_1	AT30484_1	AT30485_1	AT30487_1	AT30488_1	AT30489_1	AT30490_1	AT30493_1	AT30494_1	AT30495_1	AT30496_1	AT30503_1	AT30504_1	AT30505_1	AT30506_1	Scaffold_ID	Start	End	gene_name	InterPro_Annot	InterPro_GO_Terms	sma3s_name	sma3s_Annot	Full_name_Salinity	Function_Salinity	ID
1.Cab_g13443_ksh	g13443	11.044083579527	2.32035752822021	8.91041771563734e-43	6.33322789835117e-39	123	193	303	285	0	0	0	0	288	0	0	0	0	233	170	0	Scaffold_605	383344	390331	ksh	IPR009653 Protein kish	-	Protein kish-A	vesicle-mediated transport;intracellular transport;constitutive secretory pathway;protein secretion	NA	NA	1.Cab_g13443_ksh
2.Cab_g13194	g13194	8.59475370968259	-0.0619932588116834	1.76781354572276e-14	3.42682620322239e-11	17	36	42	85	0	0	0	0	2	0	0	9	0	22	0	10	Scaffold_578	1236	15791	NA	IPR035983 HECT, E3 ligase catalytic domain	go_function:GO:0004842 ubiquitin-protein transferase activity	NA	NA	NA	NA	2.Cab_g13194
3.Cab_g66178	g66178	8.42565208241643	-0.202647934659832	5.9527857230899e-09	2.88480113576014e-06	9	42	15	103	0	0	0	0	0	0	0	0	4	26	0	0	Scaffold_2758	62502	70823	NA	IPR032071 Domain of unknown function DUF4806	-	NA	NA	NA	NA	3.Cab_g66178
4.Cab_g47581	g47581	7.24620597801563	-1.32024947237264	8.32128699105642e-07	0.000179227073242723	13	8	8	34	0	0	0	0	0	0	19	92	15	11	51	12	Scaffold_2093	113388	119705	NA	IPR002110 Ankyrin repeat;IPR036770 Ankyrin repeat-containing domain superfamily;IPR020683 Ankyrin repeat-containing domain;IPR024862 Transient receptor potential cation channel subfamily V	go_function:GO:0005515 protein binding;go_component:GO:0016021 integral component of membrane;go_process:GO:0006811 ion transport;go_function:GO:0005216 ion channel activity	NA	NA	NA	NA	4.Cab_g47581
5.Cab_g46822_hh4	g46822	5.1040514966362	-1.17605645778828	5.09938645155587e-06	0.000820022157561177	13	7	16	35	2	0	0	0	3	0	6	0	6	18	13	15	Scaffold_2068	232085	232396	hh4	IPR001951 Histone H4;IPR004823 TATA box binding protein associated factor (TAF);IPR035425 CENP-T/Histone H4, histone fold;IPR009072 Histone-fold;IPR019809 Histone H4, conserved site	go_function:GO:0003677 DNA binding;go_process:GO:0006352 DNA-templated transcription, initiation;go_function:GO:0046982 protein heterodimerization activity;go_component:GO:0000786 nucleosome	Histone H4	negative regulation of gene expression, epigenetic;DNA-templated transcription, initiation;double-strand break repair via nonhomologous end joining;telomere organization;regulation of megakaryocyte differentiation;rDNA heterochromatin assembly;negative regulation of megakaryocyte differentiation;sexual sporulation resulting in formation of a cellular spore;nucleosome assembly;telomere capping;reg…	NA	NA	5.Cab_g46822_hh4
6.Cab_g16273	g16273	4.88858619481043	1.35644354995987	2.86370083422732e-08	1.03496089641066e-05	41	94	142	217	0	10	0	9	4	0	5	15	3	39	0	23	Scaffold_689	2649287	2655400	NA	IPR000569 HECT domain;IPR035983 HECT, E3 ligase catalytic domain	go_function:GO:0004842 ubiquitin-protein transferase activity	NA	NA	NA	NA	6.Cab_g16273
7.Cab_g45624_hcea	g45624	4.298214812914	2.69257083737029	1.39469078373838e-06	0.000277934500763116	27	405	190	677	11	37	9	7	411	85	36	93	27	45	35	93	Scaffold_2029	78591	104549	hcea	IPR001506 Peptidase M12A;IPR006026 Peptidase, metallopeptidase;IPR024079 Metallopeptidase, catalytic domain superfamily	go_process:GO:0006508 proteolysis;go_function:GO:0004222 metalloendopeptidase activity;go_function:GO:0008270 zinc ion binding;go_function:GO:0008237 metallopeptidase activity	Choriolysin H 1	NA	NA	NA	7.Cab_g45624_hcea
8.Cab_g35068_rush	g35068	4.00600844053752	7.99704666216178	1.75588020766068e-14	3.42682620322239e-11	8327	7464	7990	16335	1419	611	342	1152	3147	2630	3157	3641	719	1538	466	843	Scaffold_1590	435196	438361	rush	IPR001849 Pleckstrin homology domain;IPR000306 FYVE zinc finger;IPR015095 Alkylated DNA repair protein AlkB, homologue 8, N-terminal;IPR013083 Zinc finger, RING/FYVE/PHD-type;IPR011993 PH-like domain superfamily;IPR017455 Zinc finger, FYVE-related;IPR011011 Zinc finger, FYVE/PHD-type	go_function:GO:0046872 metal ion binding;go_function:GO:0016706 2-oxoglutarate-dependent dioxygenase activity;go_function:GO:0008168 methyltransferase activity	PH domain-containing family F member 2	endocytosis;apoptotic process;endosome organization;endosome to lysosome transport;positive regulation of autophagy;protein transport;vesicle organization;regulation of mitochondrial membrane permeability;protein localization to plasma membrane;positive regulation of intrinsic apoptotic signaling pathway	NA	NA	8.Cab_g35068_rush
9.Cab_g48687	g48687	3.9106226556518	1.14940447082116	1.43186760585211e-11	1.52658564797922e-08	32	55	224	114	9	4	6	12	36	8	0	5	62	46	20	73	Scaffold_2131	14572	26321	NA	IPR001627 Sema domain;IPR015943 WD40/YVTN repeat-like-containing domain superfamily;IPR031148 Plexin family;IPR043502 DNA/RNA polymerase superfamily;IPR036352 Sema domain superfamily	go_function:GO:0005515 protein binding;go_function:GO:0017154 semaphorin receptor activity;go_process:GO:0071526 semaphorin-plexin signaling pathway	NA	NA	NA	NA	9.Cab_g48687
10.Cab_g29857	g29857	3.83456973811973	-0.319801626889244	4.78437527826225e-06	0.000794374954192008	13	24	36	69	4	0	0	8	0	0	8	0	14	13	17	34	Scaffold_1340	936390	940677	NA	IPR003599 Immunoglobulin subtype;IPR013783 Immunoglobulin-like fold;IPR007110 Immunoglobulin-like domain;IPR036179 Immunoglobulin-like domain superfamily	-	NA	NA	NA	NA	10.Cab_g29857
11.Cab_g56748	g56748	3.64879074468243	2.6591830875076	2.79944750462264e-08	1.02918308863911e-05	193	229	333	179	40	16	31	10	70	135	50	63	32	103	50	126	Scaffold_2425	203665	214718	NA	IPR001304 C-type lectin-like;IPR016186 C-type lectin-like/link domain superfamily;IPR016187 C-type lectin fold	-	NA	NA	NA	NA	11.Cab_g56748
12.Cab_g71551	g71551	3.48282409733361	7.29785181704854	1.3552315417288e-09	8.25645776122376e-07	789	10027	10182	8238	891	609	337	1266	905	733	532	375	2492	7594	1808	3274	Scaffold_2967	4680	14391	NA	IPR001506 Peptidase M12A;IPR006026 Peptidase, metallopeptidase;IPR024079 Metallopeptidase, catalytic domain superfamily	go_process:GO:0006508 proteolysis;go_function:GO:0004222 metalloendopeptidase activity;go_function:GO:0008270 zinc ion binding;go_function:GO:0008237 metallopeptidase activity	NA	NA	NA	NA	12.Cab_g71551
13.Cab_g61737	g61737	3.46619853134009	1.76236932853004	2.71169982539115e-08	1.01441360310203e-05	110	73	192	146	11	17	21	9	15	153	71	10	48	131	114	158	Scaffold_2595	171817	175421	NA	IPR002181 Fibrinogen, alpha/beta/gamma chain, C-terminal globular domain;IPR014716 Fibrinogen, alpha/beta/gamma chain, C-terminal globular, subdomain 1;IPR020837 Fibrinogen, conserved site;IPR036056 Fibrinogen-like, C-terminal	-	NA	NA	NA	NA	13.Cab_g61737
14.Cab_g46851	g46851	3.34388845629758	3.46499721719729	4.15861584665541e-08	1.4075264396545e-05	323	415	324	582	30	16	68	124	39	47	36	28	94	124	50	268	Scaffold_2068	680751	688489	NA	IPR036816 Ribonuclease A-like domain superfamily	-	NA	NA	NA	NA	14.Cab_g46851
15.Cab_g41327_aga	g41327	3.301563919956	5.94795044600615	2.46103239706762e-06	0.000460320998269061	1479	2044	3498	3035	345	53	578	193	0	43	0	16	5326	10847	3368	4192	Scaffold_1879	5071120	5077760	aga	IPR006035 Ureohydrolase;IPR014033 Arginase;IPR020855 Ureohydrolase, manganese-binding site;IPR023696 Ureohydrolase domain superfamily	go_function:GO:0046872 metal ion binding;go_process:GO:0006525 arginine metabolic process;go_function:GO:0004053 arginase activity;go_function:GO:0016813 hydrolase activity, acting on carbon-nitrogen (but not peptide) bonds, in linear amidines	Arginase-1	urea cycle;ureteric bud development;response to hypoxia;liver development;positive regulation of endothelial cell proliferation;adaptive immune response;negative regulation of type 2 immune response;arginine metabolic process;arginine catabolic process;nitric oxide biosynthetic process;striated muscle contraction;midgut development;female pregnancy;aging;response to nutrient;response to wounding;…	NA	NA	15.Cab_g41327_aga
16.Cab_g27920	g27920	3.08326351023678	2.93541292946044	4.9620346156166e-11	4.23221856435171e-08	130	362	469	277	76	38	22	46	22	43	57	35	162	308	187	232	Scaffold_1270	306798	311706	NA	IPR000315 B-box-type zinc finger	go_function:GO:0008270 zinc ion binding	NA	NA	NA	NA	16.Cab_g27920
17.Cab_g3847_gcsH	g3847	3.08095239567858	1.6569236013008	2.90857996621115e-07	6.96850006960904e-05	64	136	68	240	14	27	16	13	84	10	5	11	0	98	98	17	Scaffold_166	1581271	1588356	gcsH	IPR033753 Glycine cleavage system H-protein/Simiate;IPR017453 Glycine cleavage system H-protein, subgroup;IPR002930 Glycine cleavage system H-protein;IPR003016 2-oxo acid dehydrogenase, lipoyl-binding site;IPR000089 Biotin/lipoyl attachment;IPR011053 Single hybrid motif	go_process:GO:0019464 glycine decarboxylation via glycine cleavage system;go_component:GO:0005960 glycine cleavage complex	Glycine cleavage system H protein	cellular amino acid metabolic process;glycine catabolic process;protein lipoylation;glycine decarboxylation via glycine cleavage system	NA	NA	17.Cab_g3847_gcsH
18.Cab_g34682	g34682	3.07575591682342	2.9863464845214	2.65458716239135e-11	2.57289827562139e-08	164	301	200	654	51	22	46	75	258	105	460	189	666	244	761	874	Scaffold_1569	16448	27029	NA	IPR006703 AIG1-type guanine nucleotide-binding (G) domain;IPR027417 P-loop containing nucleoside triphosphate hydrolase	go_function:GO:0005525 GTP binding	NA	NA	NA	NA	18.Cab_g34682
19.Cab_g62112	g62112	3.02143997039253	1.05773364796732	8.06829135806461e-08	2.38944689761127e-05	31	41	127	189	7	19	9	14	4	2	9	2	46	13	109	152	Scaffold_2607	1495949	1498019	NA	IPR029526 PiggyBac transposable element-derived protein	-	NA	NA	NA	NA	19.Cab_g62112
20.Cab_g70219_gH2A	g70219	2.90414468032797	0.991889681441504	4.38992515172342e-08	1.44009806169536e-05	19	82	144	103	8	13	11	20	13	18	34	6	42	70	41	64	Scaffold_2913	871795	872181	gH2A	IPR002119 Histone H2A;IPR032454 Histone H2A, C-terminal domain;IPR009072 Histone-fold;IPR007125 Histone H2A/H2B/H3;IPR032458 Histone H2A conserved site	go_function:GO:0003677 DNA binding;go_component:GO:0000786 nucleosome;go_function:GO:0046982 protein heterodimerization activity	Histone H2A	regulation of lipid metabolic process;positive regulation of endodermal cell differentiation;positive regulation of keratinocyte differentiation;positive regulation of response to oxidative stress;protein localization to chromatin;negative regulation of protein localization to chromosome, telomeric region;regulation of gene expression;cellular senescence;negative regulation of transcription of nu…	NA	NA	20.Cab_g70219_gH2A
1.SPol_g61520	g61520	-13.0256881027564	4.29843692211249	8.29098526777563e-76	1.7678867886478e-71	0	0	0	0	1069	674	1061	1729	0	0	372	266	0	0	0	0	Scaffold_2589	129297	141595	NA	IPR003597 Immunoglobulin C1-set;IPR037055 MHC class I-like antigen recognition-like superfamily;IPR011161 MHC class I-like antigen recognition-like;IPR013783 Immunoglobulin-like fold;IPR007110 Immunoglobulin-like domain;IPR011162 MHC classes I/II-like antigen recognition protein;IPR036179 Immunoglobulin-like domain superfamily	-	NA	NA	NA	NA	1.SPol_g61520
2.SPol_g19134	g19134	-9.90069281238572	1.22641586060676	3.22109453092339e-11	2.86180827845331e-08	0	0	0	0	112	15	201	170	152	347	244	172	102	0	236	292	Scaffold_790	4685	23374	NA	IPR029495 NACHT-associated domain;IPR041075 NOD2, winged helix domain;IPR036388 Winged helix-like DNA-binding domain superfamily;IPR032675 Leucine-rich repeat domain superfamily;IPR001611 Leucine-rich repeat;IPR007111 NACHT nucleoside triphosphatase;IPR041267 NACHT, LRR and PYD domains-containing protein, helical domain HD2;IPR009057 Homeobox-like domain superfamily	go_function:GO:0005515 protein binding	NA	NA	NA	NA	2.SPol_g19134
3.SPol_g13176_H1F1	g13176	-8.62268741483152	5.57770206549763	1.62417769973031e-48	1.73161705456747e-44	8	3	4	5	2527	3042	1866	3292	2932	4352	3404	3108	896	3310	2019	4	Scaffold_570	265148	265690	H1F1	IPR005819 Linker histone H1/H5;IPR005818 Linker histone H1/H5, domain H15;IPR036388 Winged helix-like DNA-binding domain superfamily;IPR036390 Winged helix DNA-binding domain superfamily	go_function:GO:0003677 DNA binding;go_component:GO:0000786 nucleosome;go_process:GO:0006334 nucleosome assembly	Histone H1a	negative regulation of transcription by RNA polymerase II;chromatin organization;nucleosome assembly;regulation of transcription, DNA-templated;regulation of transcription by RNA polymerase II;multicellular organism development;spermatogenesis;binding of sperm to zona pellucida;muscle organ development;nucleosome positioning;cell differentiation;chromosome condensation;positive regulation of cell…	NA	NA	3.SPol_g13176_H1F1
4.SPol_g40972	g40972	-8.22716617848995	-0.313908176438811	3.12046657527677e-09	1.6228709459665e-06	0	0	0	0	34	26	16	104	925	58	29	24	0	0	0	0	Scaffold_1871	40373	40812	NA	IPR013106 Immunoglobulin V-set domain;IPR013783 Immunoglobulin-like fold;IPR007110 Immunoglobulin-like domain;IPR036179 Immunoglobulin-like domain superfamily	-	NA	NA	NA	NA	4.SPol_g40972
5.SPol_g17485_NTT4	g17485	-8.12895412517755	-0.399396748463523	3.39652039933847e-09	1.72438105893082e-06	0	0	0	0	44	21	11	92	7	3	4	36	0	12	30	6	Scaffold_717	998394	1013580	NTT4	IPR002438 Neutral amino acid SLC6 transporter;IPR000175 Sodium:neurotransmitter symporter;IPR037272 Sodium:neurotransmitter symporter superfamily	go_component:GO:0005887 integral component of plasma membrane;go_component:GO:0016021 integral component of membrane	Sodium-dependent neutral amino acid transporter B(0)AT2	amino acid transmembrane transport;neurotransmitter transport;amino acid transport;response to osmotic stress;hyperosmotic response;response to nutrient;neutral amino acid transport;glycine transport;leucine transport;proline transport;amino-acid betaine transport;alanine transport;proline transmembrane transport;sodium ion transmembrane transport;amino acid import across plasma membrane;transpor…	NA	NA	5.SPol_g17485_NTT4
6.SPol_g5346	g5346	-7.89520039962378	-0.600715423535947	1.71132473116368e-07	4.67827913366706e-05	0	0	0	0	13	11	24	98	0	0	0	0	0	0	0	0	Scaffold_231	941193	942131	NA	IPR042566 L1 transposable element, C-terminal domain;IPR004244 Transposase, L1	-	NA	NA	NA	NA	6.SPol_g5346
7.SPol_g34056	g34056	-7.89372933955513	-0.601723108988776	1.84779549621018e-07	4.80494431288899e-05	0	0	0	0	14	10	24	98	1	0	0	0	0	0	0	0	Scaffold_1530	261974	262912	NA	IPR042566 L1 transposable element, C-terminal domain;IPR004244 Transposase, L1	-	NA	NA	NA	NA	7.SPol_g34056
8.SPol_g47301	g47301	-7.89372933955513	-0.601723108988776	1.84779549621018e-07	4.80494431288899e-05	0	0	0	0	14	10	24	98	0	0	0	0	0	0	0	0	Scaffold_2081	395463	396401	NA	IPR042566 L1 transposable element, C-terminal domain;IPR004244 Transposase, L1	-	NA	NA	NA	NA	8.SPol_g47301
9.SPol_g50476_sfl	g50476	-7.88981646504907	-0.627298527790297	8.37109083956989e-10	5.40899302945905e-07	0	0	0	0	19	36	25	47	52	44	41	0	47	42	45	0	Scaffold_2203	354656	357657	sfl	IPR002492 Transposase, Tc1-like;IPR025246 Transposase IS30-like HTH domain;IPR036397 Ribonuclease H superfamily;IPR009057 Homeobox-like domain superfamily;IPR027417 P-loop containing nucleoside triphosphate hydrolase	go_function:GO:0003677 DNA binding;go_process:GO:0015074 DNA integration;go_process:GO:0006313 transposition, DNA-mediated;go_function:GO:0003676 nucleic acid binding	NDST-1	polysaccharide biosynthetic process;regulation of angiotensin levels in blood;cardiac septum development;glycosaminoglycan biosynthetic process;protein deacetylation;protein sulfation;sulfur compound metabolic process;inflammatory response;segment polarity determination;epithelial cell migration, open tracheal system;imaginal disc-derived wing vein specification;heart development;mesoderm migrati…	NA	NA	9.SPol_g50476_sfl
10.SPol_g59997_siat8a	g59997	-7.86860494654838	-0.659044200455049	1.55475820778548e-08	6.13927949344625e-06	0	0	0	0	35	37	29	13	30	12	0	0	3	0	57	0	Scaffold_2536	1539036	1564841	siat8a	IPR001675 Glycosyl transferase family 29;IPR038578 GT29-like superfamiliy	go_function:GO:0008373 sialyltransferase activity;go_process:GO:0006486 protein glycosylation	Alpha-2,8-sialyltransferase 8A	ganglioside biosynthetic process;blastocyst hatching;carbohydrate metabolic process;protein glycosylation;N-glycan processing;protein O-linked glycosylation;sphingolipid metabolic process;glycosphingolipid biosynthetic process;multicellular organism development;positive regulation of cell population proliferation;glycoprotein metabolic process;glycolipid biosynthetic process;oligosaccharide metab…	NA	NA	10.SPol_g59997_siat8a
11.SPol_g66920_H1F1	g66920	-7.86224091193985	-0.646800379572403	2.16124724602195e-07	5.4862232174912e-05	0	0	0	0	8	52	13	55	23	14	15	14	18	5	0	8	Scaffold_2783	100967	101575	H1F1	IPR005819 Linker histone H1/H5;IPR005818 Linker histone H1/H5, domain H15;IPR036388 Winged helix-like DNA-binding domain superfamily;IPR036390 Winged helix DNA-binding domain superfamily	go_function:GO:0003677 DNA binding;go_component:GO:0000786 nucleosome;go_process:GO:0006334 nucleosome assembly	Histone H1a	negative regulation of transcription by RNA polymerase II;chromatin organization;nucleosome assembly;regulation of transcription, DNA-templated;regulation of transcription by RNA polymerase II;multicellular organism development;spermatogenesis;binding of sperm to zona pellucida;muscle organ development;nucleosome positioning;cell differentiation;chromosome condensation;positive regulation of cell…	NA	NA	11.SPol_g66920_H1F1
12.SPol_g36257	g36257	-7.71996151455932	-0.779566538005257	5.02374504754975e-08	1.59882560670005e-05	0	0	0	0	35	43	10	20	7	26	35	0	1	0	1	0	Scaffold_1659	677947	679191	NA	IPR000477 Reverse transcriptase domain	-	NA	NA	NA	NA	12.SPol_g36257
13.SPol_g4430_STAC2	g4430	-7.59070459777139	-0.882678850354649	2.87558939791002e-09	1.53290481829088e-06	0	0	0	0	19	25	19	42	10	17	9	22	0	0	24	16	Scaffold_189	851167	887502	STAC2	IPR039688 STAC1/2/3;IPR001452 SH3 domain;IPR036028 SH3-like domain superfamily	go_function:GO:0005515 protein binding	24b2/STAC2	skeletal muscle contraction;intracellular signal transduction;positive regulation of voltage-gated calcium channel activity;positive regulation of protein localization to plasma membrane	NA	NA	13.SPol_g4430_STAC2
14.SPol_g63964_al	g63964	-7.38281436436527	-1.07453839064283	2.41531023784162e-07	6.05901884723492e-05	0	0	0	0	31	22	20	9	0	0	4	0	0	0	0	0	Scaffold_2670	1251105	1253235	al	IPR003025 Transcription factor Otx;IPR001356 Homeobox domain;IPR013851 Transcription factor Otx, C-terminal;IPR017970 Homeobox, conserved site;IPR009057 Homeobox-like domain superfamily	go_process:GO:0007275 multicellular organism development;go_function:GO:0003700 DNA-binding transcription factor activity;go_function:GO:0003677 DNA binding;go_component:GO:0005634 nucleus;go_process:GO:0006355 regulation of transcription, DNA-templated;go_function:GO:0000981 DNA-binding transcription factor activity, RNA polymerase II-specific	Homeobox protein orthopedia	negative regulation of transcription by RNA polymerase II;skeletal system development;osteoblast differentiation;eye development;embryonic development via the syncytial blastoderm;endoderm formation;cell fate specification;compound eye morphogenesis;neural crest cell migration;neuron migration;neural tube closure;positive regulation of neuroblast proliferation;positive regulation of mesenchymal c…	NA	NA	14.SPol_g63964_al
15.SPol_g68164_FHOD3	g68164	-7.09281264122613	1.7157331505361	2.2200624202126e-21	1.18345977465483e-17	1	0	3	0	183	206	149	147	23	34	18	5	6	8	5	2	Scaffold_2825	657626	679406	FHOD3	IPR041387 FHOD1, N-terminal GTPase-binding domain;IPR003653 Ulp1 protease family, C-terminal catalytic domain;IPR011989 Armadillo-like helical;IPR039598 HMG domain-containing protein 3;IPR003034 SAP domain;IPR038765 Papain-like cysteine peptidase superfamily	go_process:GO:0006508 proteolysis;go_function:GO:0008234 cysteine-type peptidase activity	FH1/FH2 domain-containing protein 3	negative regulation of actin filament polymerization;cortical actin cytoskeleton organization;sarcomere organization;actin filament network formation;cardiac myofibril assembly	NA	NA	15.SPol_g68164_FHOD3
16.SPol_g51413	g51413	-6.68369343337545	3.9213544490016	8.43663677526147e-07	0.0001798944059589	6	5	0	12	809	631	18	2565	6	5	0	23	894	806	26	19	Scaffold_2243	33548	43913	NA	IPR007237 CD20-like family	go_component:GO:0016021 integral component of membrane	NA	NA	NA	NA	16.SPol_g51413
17.SPol_g42643	g42643	-6.45704676766113	0.637760926240212	6.21747890150992e-11	5.09905010064985e-08	0	0	0	3	145	43	34	122	192	109	31	76	21	88	55	125	Scaffold_1906	5196345	5198440	NA	IPR027806 Harbinger transposase-derived nuclease domain	-	NA	NA	NA	NA	17.SPol_g42643
18.SPol_g23943	g23943	-6.39162396877952	1.41936206376988	1.04632781310199e-15	3.18726399411053e-12	0	0	2	4	177	166	117	84	3	29	8	0	4	4	2	0	Scaffold_1073	5200885	5207971	NA	IPR003653 Ulp1 protease family, C-terminal catalytic domain;IPR039598 HMG domain-containing protein 3;IPR003034 SAP domain;IPR038765 Papain-like cysteine peptidase superfamily	go_process:GO:0006508 proteolysis;go_function:GO:0008234 cysteine-type peptidase activity	NA	NA	NA	NA	18.SPol_g23943
19.SPol_g50782_P2X2	g50782	-6.36165335603553	0.558038277062502	1.12192103085354e-12	1.40721894946412e-09	0	0	0	3	106	50	76	67	63	209	36	0	0	0	117	9	Scaffold_2216	213992	240566	P2X2	IPR001429 P2X purinoreceptor;IPR003047 P2X4 purinoceptor;IPR027309 P2X purinoreceptor extracellular domain superfamily	go_process:GO:0033198 response to ATP;go_function:GO:0004931 extracellularly ATP-gated cation channel activity;go_function:GO:0001614 purinergic nucleotide receptor activity;go_component:GO:0005887 integral component of plasma membrane;go_process:GO:0098655 cation transmembrane transport;go_function:GO:0005216 ion channel activity;go_component:GO:0016020 membrane;go_process:GO:0006811 ion transpo…	ATP receptor	response to hypoxia;regulation of sodium ion transport;response to ischemia;detection of hypoxic conditions in blood by carotid body chemoreceptor signaling;nitric oxide biosynthetic process;ion transport;cation transport;calcium ion transport;signal transduction;chemical synaptic transmission;neuromuscular synaptic transmission;neuromuscular junction development;blood coagulation;sensory percept…	NA	NA	19.SPol_g50782_P2X2
20.SPol_g51103_DUTT1	g51103	-6.18904479149087	1.70322592340323	8.73314750716242e-16	3.10361507158707e-12	1	0	7	0	181	207	143	145	25	37	18	8	5	15	6	4	Scaffold_2230	862518	907140	DUTT1	IPR003598 Immunoglobulin subtype 2;IPR003599 Immunoglobulin subtype;IPR013783 Immunoglobulin-like fold;IPR003653 Ulp1 protease family, C-terminal catalytic domain;IPR013098 Immunoglobulin I-set;IPR039598 HMG domain-containing protein 3;IPR007110 Immunoglobulin-like domain;IPR003034 SAP domain;IPR036179 Immunoglobulin-like domain superfamily;IPR038765 Papain-like cysteine peptidase superfamily	go_process:GO:0006508 proteolysis;go_function:GO:0008234 cysteine-type peptidase activity	Roundabout homolog 1	metanephros development;ureteric bud development;neuron migration;kidney development;cell migration involved in sprouting angiogenesis;outflow tract septum morphogenesis;aortic valve morphogenesis;pulmonary valve morphogenesis;endocardial cushion formation;ventricular septum development;activation of cysteine-type endopeptidase activity involved in apoptotic process;homophilic cell adhesion via p…	NA	NA	20.SPol_g51103_DUTT1

## Sheet: MarchSPol
annotated_MarchSPol_gill
	gene_id	logFC	logCPM	PValue	FDR	AT30482_1	AT30483_1	AT30484_1	AT30485_1	AT30487_1	AT30488_1	AT30489_1	AT30490_1	AT30493_1	AT30494_1	AT30495_1	AT30496_1	AT30503_1	AT30504_1	AT30505_1	AT30506_1	Scaffold_ID	Start	End	gene_name	InterPro_Annot	InterPro_GO_Terms	sma3s_name	sma3s_Annot	Full_name_Salinity	Function_Salinity	ID
1.March_g15358	g15358	10.3638186169077	1.57820740379595	9.24305886720262e-06	0.000885978002617595	0	178	234	0	0	0	0	0	0	243	248	196	104	199	0	286	Scaffold_645	54306	57596	NA	IPR019761 DNA-directed RNA polymerase M, 15kDa subunit, conserved site	-	NA	NA	NA	NA	1.March_g15358
2.March_g46636_EMK1	g46636	8.7854456990124	0.0749874410136177	1.7151144395426e-18	1.94683542724291e-15	0	0	0	29	0	0	0	0	69	54	76	37	24	40	0	0	Scaffold_2064	294513	303257	EMK1	IPR000719 Protein kinase domain;IPR011009 Protein kinase-like domain superfamily	go_function:GO:0004672 protein kinase activity;go_process:GO:0006468 protein phosphorylation;go_function:GO:0005524 ATP binding	ELKL motif kinase 1	MAPK cascade;microtubule cytoskeleton organization;autophagy of mitochondrion;microtubule bundle formation;neuron migration;protein phosphorylation;cytoskeleton organization;nervous system development;regulation of neuron projection development;positive regulation of neuron projection development;Wnt signaling pathway;peptidyl-serine phosphorylation;peptidyl-threonine phosphorylation;establishmen…	NA	NA	2.March_g46636_EMK1
3.March_g35151	g35151	7.80648771718126	-0.820574297254662	3.85713348459627e-09	1.02699750447269e-06	7	0	24	2	0	0	0	0	34	12	24	42	0	0	0	0	Scaffold_1591	688648	689142	NA	IPR000515 ABC transporter type 1, transmembrane domain MetI-like	go_process:GO:0055085 transmembrane transport;go_component:GO:0016020 membrane	NA	NA	NA	NA	3.March_g35151
4.March_g59835	g59835	7.41536312515168	1.042769609509	2.3976500831376e-21	3.23188245893929e-18	0	0	0	0	0	0	1	1	176	88	147	68	0	4	0	0	Scaffold_2534	455773	456507	NA	IPR004244 Transposase, L1	-	NA	NA	NA	NA	4.March_g59835
5.March_g59130	g59130	6.32402555983721	-0.0479093818108307	9.18955356661987e-12	3.88610003473119e-09	0	1	2	0	0	0	0	2	35	63	39	66	6	0	2	0	Scaffold_2518	713766	715241	NA	IPR001584 Integrase, catalytic core;IPR036397 Ribonuclease H superfamily;IPR012337 Ribonuclease H-like superfamily	go_process:GO:0015074 DNA integration;go_function:GO:0003676 nucleic acid binding	NA	NA	NA	NA	5.March_g59130
6.March_g15261	g15261	6.31746633209639	-0.648733185153937	8.1876910103411e-08	1.63503640759284e-05	2	11	6	19	1	0	0	0	62	10	45	18	0	0	0	0	Scaffold_644	2316666	2322632	NA	IPR000477 Reverse transcriptase domain;IPR043128 Reverse transcriptase/Diguanylate cyclase domain;IPR041588 Integrase zinc-binding domain;IPR005312 Protein of unknown function DUF1759;IPR036397 Ribonuclease H superfamily;IPR040676 Domain of unknown function DUF5641;IPR008042 Retrotransposon, Pao;IPR001584 Integrase, catalytic core;IPR043502 DNA/RNA polymerase superfamily;IPR012337 Ribonuclease H-…	go_function:GO:0003676 nucleic acid binding;go_process:GO:0015074 DNA integration	NA	NA	NA	NA	6.March_g15261
7.March_g48576	g48576	6.21066341645126	2.1173912588822	9.69017634545447e-07	0.000144129678098218	2	3	23	4	0	0	0	15	177	348	171	277	32	0	3	1	Scaffold_2126	1206420	1212116	NA	IPR041588 Integrase zinc-binding domain;IPR043128 Reverse transcriptase/Diguanylate cyclase domain;IPR000477 Reverse transcriptase domain;IPR001584 Integrase, catalytic core;IPR026523 Paraneoplastic antigen Ma;IPR036397 Ribonuclease H superfamily;IPR041577 Reverse transcriptase/retrotransposon-derived protein, RNase H-like domain;IPR001878 Zinc finger, CCHC-type;IPR036875 Zinc finger, CCHC-type s…	go_process:GO:0015074 DNA integration;go_function:GO:0003676 nucleic acid binding;go_function:GO:0008270 zinc ion binding	NA	NA	NA	NA	7.March_g48576
8.March_g17784	g17784	5.9355275115283	-0.951865549495159	1.02902212036486e-05	0.000960732470558824	0	0	0	0	0	0	1	0	3	36	24	37	1	0	0	0	Scaffold_727	229505	230209	NA	IPR015095 Alkylated DNA repair protein AlkB, homologue 8, N-terminal;IPR000477 Reverse transcriptase domain	go_function:GO:0016706 2-oxoglutarate-dependent dioxygenase activity;go_function:GO:0008168 methyltransferase activity	NA	NA	NA	NA	8.March_g17784
9.March_g58025	g58025	5.84696193793499	1.15492815055149	1.13737886934851e-07	2.15174123467012e-05	2	2	2	0	0	0	0	9	86	179	73	148	22	0	1	1	Scaffold_2468	226135	232893	NA	IPR001584 Integrase, catalytic core;IPR000477 Reverse transcriptase domain;IPR036397 Ribonuclease H superfamily;IPR041577 Reverse transcriptase/retrotransposon-derived protein, RNase H-like domain;IPR041588 Integrase zinc-binding domain;IPR043128 Reverse transcriptase/Diguanylate cyclase domain;IPR026523 Paraneoplastic antigen Ma;IPR001878 Zinc finger, CCHC-type;IPR043502 DNA/RNA polymerase super…	go_process:GO:0015074 DNA integration;go_function:GO:0003676 nucleic acid binding;go_function:GO:0008270 zinc ion binding	NA	NA	NA	NA	9.March_g58025
10.March_g33149	g33149	5.57527359813246	1.94313833567169	9.5399284997674e-09	2.36491537878717e-06	0	3	0	0	4	0	10	0	251	282	169	171	0	494	16	290	Scaffold_1473	4211282	4216245	NA	IPR000436 Sushi/SCR/CCP domain;IPR035976 Sushi/SCR/CCP superfamily	-	NA	NA	NA	NA	10.March_g33149
11.March_g69711	g69711	5.51084636014388	0.981894409619492	4.34199915660774e-07	7.20337660081224e-05	1	30	1	87	8	0	0	0	90	88	147	115	0	0	0	0	Scaffold_2890	753163	757058	NA	IPR006120 Resolvase, HTH domain;IPR012337 Ribonuclease H-like superfamily	go_function:GO:0003677 DNA binding;go_process:GO:0006310 DNA recombination;go_function:GO:0000150 DNA strand exchange activity	NA	NA	NA	NA	11.March_g69711
12.March_g62936	g62936	5.4823017472218	-0.426223858343642	1.18169911648359e-06	0.000171095646652106	2	19	7	3	0	0	0	3	19	91	19	26	0	3	5	0	Scaffold_2635	3804	9851	NA	IPR003599 Immunoglobulin subtype;IPR013106 Immunoglobulin V-set domain;IPR013783 Immunoglobulin-like fold;IPR007110 Immunoglobulin-like domain;IPR036179 Immunoglobulin-like domain superfamily	-	NA	NA	NA	NA	12.March_g62936
13.March_g17026_cyc	g17026	5.38814737642768	4.73799450420003	9.42754420614091e-08	1.82320187841788e-05	0	10	38	9	46	46	24	0	2566	1069	1640	991	0	0	0	0	Scaffold_710	1527347	1547342	cyc	IPR002327 Cytochrome c, class IA/ IB;IPR008160 Collagen triple helix repeat;IPR009056 Cytochrome c-like domain;IPR011936 Myxococcus cysteine-rich repeat;IPR036909 Cytochrome c-like domain superfamily	go_function:GO:0009055 electron transfer activity;go_function:GO:0020037 heme binding	Cytochrome c	acetylcholine catabolic process in synaptic cleft;osteoblast differentiation;tissue homeostasis;chondrocyte differentiation;response to ischemia;mitochondrial electron transport, ubiquinol to cytochrome c;mitochondrial electron transport, cytochrome c to oxygen;apoptotic process;activation of cysteine-type endopeptidase activity involved in apoptotic process;sperm individualization;regulation of …	NA	NA	13.March_g17026_cyc
14.March_g26477	g26477	5.24598160399124	-0.999090325817974	8.09229524549638e-07	0.000124661808256872	4	3	20	0	0	0	0	2	11	30	50	12	18	2	2	3	Scaffold_1158	573915	575627	NA	IPR000477 Reverse transcriptase domain;IPR015095 Alkylated DNA repair protein AlkB, homologue 8, N-terminal;IPR043502 DNA/RNA polymerase superfamily	go_function:GO:0016706 2-oxoglutarate-dependent dioxygenase activity;go_function:GO:0008168 methyltransferase activity	NA	NA	NA	NA	14.March_g26477
15.March_g59129	g59129	4.62116011693795	-0.858456138775724	3.26149634288622e-06	0.000386579342710671	2	0	1	1	0	0	0	4	19	45	15	28	6	0	1	1	Scaffold_2518	709662	712799	NA	IPR043128 Reverse transcriptase/Diguanylate cyclase domain;IPR000477 Reverse transcriptase domain;IPR026523 Paraneoplastic antigen Ma;IPR001878 Zinc finger, CCHC-type;IPR043502 DNA/RNA polymerase superfamily;IPR021109 Aspartic peptidase domain superfamily;IPR036875 Zinc finger, CCHC-type superfamily	go_function:GO:0008270 zinc ion binding;go_function:GO:0003676 nucleic acid binding	NA	NA	NA	NA	15.March_g59129
16.March_g59401	g59401	4.54674182691008	0.955575753426555	7.55640116819514e-09	1.91728122346429e-06	0	0	0	0	2	0	9	4	158	85	108	76	0	1	0	0	Scaffold_2523	1315372	1316103	NA	IPR004244 Transposase, L1	-	NA	NA	NA	NA	16.March_g59401
17.March_g48924	g48924	4.42757880166352	0.773790811068099	1.85886286883408e-11	7.56416896078199e-09	6	7	2	8	8	0	3	4	110	76	131	62	26	60	10	11	Scaffold_2143	35666	43145	NA	IPR008906 HAT, C-terminal dimerisation domain;IPR012337 Ribonuclease H-like superfamily	go_function:GO:0046983 protein dimerization activity	NA	NA	NA	NA	17.March_g48924
18.March_g25695_atp4a	g25695	4.24152111536748	4.94800371267079	3.24927020832738e-06	0.000386579342710671	25	520	56	73	54	78	88	97	3467	3113	301	216	9845	78834	6771	34095	Scaffold_1133	3106392	3125324	atp4a	IPR004014 Cation-transporting P-type ATPase, N-terminal;IPR023214 HAD superfamily;IPR023299 P-type ATPase, cytoplasmic domain N;IPR005775 P-type ATPase subfamily IIC, subunit alpha;IPR006068 Cation-transporting P-type ATPase, C-terminal;IPR001757 P-type ATPase;IPR044492 P-type ATPase, haloacid dehalogenase domain;IPR018303 P-type ATPase, phosphorylation site;IPR023298 P-type ATPase, transmembrane…	go_function:GO:0000166 nucleotide binding;go_component:GO:0016021 integral component of membrane;go_process:GO:0006813 potassium ion transport;go_function:GO:0005524 ATP binding;go_function:GO:0008556 P-type potassium transmembrane transporter activity;go_function:GO:0016887 ATPase	Na(+)/K(+) ATPase alpha-1 subunit	neurotransmitter uptake;behavioral fear response;gastric acid secretion;tissue homeostasis;regulation of the force of heart contraction;regulation of sodium ion transport;regulation of respiratory gaseous exchange by nervous system process;cation transport;potassium ion transport;sodium ion transport;cellular sodium ion homeostasis;regulation of pH;regulation of muscle contraction;regulation of s…	NA	NA	18.March_g25695_atp4a
19.March_g48611	g48611	4.11578164900079	-0.282494492376398	7.71029986518061e-06	0.000764951539999157	0	0	0	0	0	1	4	3	77	19	59	18	0	2	0	0	Scaffold_2129	209820	210554	NA	IPR004244 Transposase, L1	-	NA	NA	NA	NA	19.March_g48611
20.March_g58975	g58975	4.08807587435381	0.368262463737188	1.30541081182879e-12	6.54739418109572e-10	7	9	26	25	3	5	1	5	68	78	60	64	10	27	7	31	Scaffold_2513	815479	818496	NA	IPR000477 Reverse transcriptase domain;IPR015095 Alkylated DNA repair protein AlkB, homologue 8, N-terminal;IPR036691 Endonuclease/exonuclease/phosphatase superfamily;IPR043502 DNA/RNA polymerase superfamily	go_function:GO:0016706 2-oxoglutarate-dependent dioxygenase activity;go_function:GO:0008168 methyltransferase activity	NA	NA	NA	NA	20.March_g58975
1.SPol_g10729_DCTD	g10729	-13.8499907899407	5.02899753099941	6.52783561183973e-42	7.03929153202738e-38	165	927	1669	1049	2493	1604	424	2739	0	0	0	0	0	0	0	0	Scaffold_461	78458	105936	DCTD	IPR002125 Cytidine and deoxycytidylate deaminase domain;IPR015517 Deoxycytidylate deaminase-related;IPR016192 APOBEC/CMP deaminase, zinc-binding;IPR035105 Deoxycytidylate deaminase domain;IPR016193 Cytidine deaminase-like	go_function:GO:0016787 hydrolase activity;go_function:GO:0008270 zinc ion binding;go_function:GO:0003824 catalytic activity	dCMP deaminase	pyrimidine nucleotide metabolic process;dUMP biosynthetic process;dTMP biosynthetic process;nucleotide biosynthetic process;nucleobase-containing small molecule interconversion	NA	NA	1.SPol_g10729_DCTD
2.SPol_g34432	g34432	-10.3535252762993	1.55658246617481	2.78366221537164e-24	7.79658990010966e-21	133	0	502	119	122	226	79	171	0	0	0	0	432	602	364	262	Scaffold_1553	28399	44346	NA	IPR013106 Immunoglobulin V-set domain;IPR003599 Immunoglobulin subtype;IPR013783 Immunoglobulin-like fold;IPR007110 Immunoglobulin-like domain;IPR036179 Immunoglobulin-like domain superfamily	-	NA	NA	NA	NA	2.SPol_g34432
3.SPol_g57520_G1P3	g57520	-10.1300433448765	4.04446809251397	1.04602277452176e-05	0.000972395395608228	4	1005	2631	8	2809	10	436	74	3	0	0	0	0	0	3	0	Scaffold_2452	777128	787671	G1P3	IPR009311 Interferon alpha-inducible protein IFI6/IFI27-like;IPR038213 IFI6/IFI27-like domain superfamily	go_component:GO:0016021 integral component of membrane	ISG12(b)	negative regulation of transcription by RNA polymerase II;release of cytochrome c from mitochondria;apoptotic process;immune response;aging;response to virus;viral process;regulation of epidermal growth factor receptor signaling pathway;negative regulation of apoptotic process;negative regulation of cysteine-type endopeptidase activity involved in apoptotic process;proteasome-mediated ubiquitin-d…	NA	NA	3.SPol_g57520_G1P3
4.SPol_g64771_TMEM3	g64771	-9.0071189025574	3.29276882154132	2.47951828506398e-38	1.78252569513249e-34	392	890	1754	1286	341	476	291	1105	0	4	0	0	155	1494	603	1035	Scaffold_2702	2075323	2076255	TMEM3	IPR002659 Glycosyl transferase, family 31	go_function:GO:0016758 transferase activity, transferring hexosyl groups;go_component:GO:0016020 membrane;go_process:GO:0006486 protein glycosylation	BGnT-7	protein glycosylation;axon guidance;sensory perception of smell;glycoprotein biosynthetic process;O-glycan processing;O-glycan processing, core 3;keratan sulfate biosynthetic process;poly-N-acetyllactosamine biosynthetic process;cellular response to leukemia inhibitory factor	NA	NA	4.SPol_g64771_TMEM3
5.SPol_g33182	g33182	-8.89663905060909	0.134042523181235	1.47187620332327e-06	0.000206129571929045	0	32	27	42	4	136	26	36	0	0	0	0	8	7	3	5	Scaffold_1473	4769508	4777148	NA	IPR016817 Mannose-P-dolichol utilization defect 1 protein	-	NA	NA	NA	NA	5.SPol_g33182
6.SPol_g57785	g57785	-8.71046444203622	-0.0219255964656483	1.45819892549853e-13	7.6704820063968e-11	0	0	3	4	65	52	16	67	0	0	0	0	0	0	0	0	Scaffold_2461	989808	990779	NA	IPR004244 Transposase, L1	-	NA	NA	NA	NA	6.SPol_g57785
7.SPol_g61150	g61150	-8.50549335139603	1.25403712648716	2.892044289928e-24	7.79658990010966e-21	61	83	154	87	128	81	67	253	0	1	0	0	0	0	0	0	Scaffold_2572	616246	617205	NA	IPR043636 L1 transposable element, RRM domain;IPR004244 Transposase, L1	-	NA	NA	NA	NA	7.SPol_g61150
8.SPol_g34428_HSPA12A	g34428	-8.27664434371439	-0.419894287460493	9.65705155121219e-10	2.97533758292848e-07	53	0	200	28	20	53	10	69	0	0	0	0	208	314	641	286	Scaffold_1553	13988	14709	HSPA12A	IPR043129 ATPase, nucleotide binding domain	-	Heat shock 70 kDa protein 12A	NA	NA	NA	8.SPol_g34428_HSPA12A
9.SPol_g46238	g46238	-8.24629517087081	1.00235189707097	6.04804133669761e-23	1.30438107508557e-19	68	98	196	118	107	67	60	205	0	1	0	0	0	0	0	0	Scaffold_2052	924648	925652	NA	IPR043636 L1 transposable element, RRM domain;IPR004244 Transposase, L1	-	NA	NA	NA	NA	9.SPol_g46238
10.SPol_g63311	g63311	-8.21944283283993	0.976246386175914	5.44075982738078e-23	1.30378741330135e-19	67	95	195	116	105	67	59	199	0	1	0	0	0	0	0	0	Scaffold_2647	129804	130808	NA	IPR043636 L1 transposable element, RRM domain;IPR004244 Transposase, L1	-	NA	NA	NA	NA	10.SPol_g63311
11.SPol_g31829	g31829	-8.18828041326441	0.94633883774281	1.76347891523358e-22	2.95813827039818e-19	68	92	184	110	100	64	59	199	0	1	0	0	0	0	0	0	Scaffold_1412	2844153	2845157	NA	IPR043636 L1 transposable element, RRM domain;IPR004244 Transposase, L1	-	NA	NA	NA	NA	11.SPol_g31829
12.SPol_g51708	g51708	-8.18738090463112	0.945547122188386	2.40226155684168e-22	3.70068392831461e-19	65	90	184	109	101	64	58	199	0	1	0	0	0	0	0	0	Scaffold_2255	163466	164470	NA	IPR043636 L1 transposable element, RRM domain;IPR004244 Transposase, L1	-	NA	NA	NA	NA	12.SPol_g51708
13.SPol_g8903	g8903	-8.17837959147992	0.936844922156838	3.24465474506501e-22	4.66516459245448e-19	65	90	167	98	103	62	58	196	0	1	0	0	0	0	0	0	Scaffold_364	2677084	2678088	NA	IPR043636 L1 transposable element, RRM domain;IPR004244 Transposase, L1	-	NA	NA	NA	NA	13.SPol_g8903
14.SPol_g5346	g5346	-8.08713721029468	-0.573492033014152	2.14119761056838e-08	4.91268179437535e-06	0	0	0	0	13	11	24	98	0	0	0	0	0	0	0	0	Scaffold_231	941193	942131	NA	IPR042566 L1 transposable element, C-terminal domain;IPR004244 Transposase, L1	-	NA	NA	NA	NA	14.SPol_g5346
15.SPol_g47301	g47301	-8.08538885692861	-0.574677831830382	2.34391193469828e-08	5.32117354690925e-06	0	0	0	0	14	10	24	98	0	0	0	0	0	0	0	0	Scaffold_2081	395463	396401	NA	IPR042566 L1 transposable element, C-terminal domain;IPR004244 Transposase, L1	-	NA	NA	NA	NA	15.SPol_g47301
16.SPol_g34056	g34056	-6.55356897105227	-0.565766771218495	1.56225140526909e-07	2.92983270064682e-05	0	0	0	0	14	10	24	98	1	0	0	0	0	0	0	0	Scaffold_1530	261974	262912	NA	IPR042566 L1 transposable element, C-terminal domain;IPR004244 Transposase, L1	-	NA	NA	NA	NA	16.SPol_g34056
17.SPol_g3943	g3943	-6.50253026133701	4.81139293713393	1.93226807526794e-06	0.000255663960609225	3	995	984	67	47	3377	1357	181	36	16	12	9	3	0	5	4	Scaffold_170	99011	106590	NA	IPR009803 Protein of unknown function DUF1373	-	NA	NA	NA	NA	17.SPol_g3943
18.SPol_g32684	g32684	-6.4233801060676	-0.713589134158623	3.00554192445974e-12	1.40914179749616e-09	0	0	5	0	29	24	28	32	0	1	0	0	2	2	0	1	Scaffold_1455	108380	109051	NA	IPR004244 Transposase, L1	-	NA	NA	NA	NA	18.SPol_g32684
19.SPol_g41389	g41389	-6.25630005642915	5.76955117501498	1.52108324260921e-06	0.000211646466408728	0	1215	1760	191	145	5652	3349	482	102	22	23	21	30	6	29	59	Scaffold_1879	6679127	6688172	NA	IPR002181 Fibrinogen, alpha/beta/gamma chain, C-terminal globular domain;IPR014716 Fibrinogen, alpha/beta/gamma chain, C-terminal globular, subdomain 1;IPR036056 Fibrinogen-like, C-terminal	-	NA	NA	NA	NA	19.SPol_g41389
20.SPol_g57162	g57162	-6.15953646060978	4.148190909465	6.48048333054862e-06	0.000685120509754618	0	383	400	40	43	2121	821	160	35	9	4	9	0	0	3	3	Scaffold_2436	1453591	1454670	NA	IPR019188 Small nuclear RNA activating complex (SNAPc), subunit SNAP43	-	NA	NA	NA	NA	20.SPol_g57162
