# Supplementary material
Source: Research Square preprint supplement (doi:10.21203/rs.3.rs-9115348/v1)
Supplement: Supplementary file 7 [file b3faa9cffecb892c70bf6b48.xlsx]

## Sheet: Hoja 1 - combined_tissues_immu
gene_id	tissue	Scaffold_ID	Start	End	sampleA	sampleB	logFC	InterPro_Annot	sma3s_name	sma3s_Annot	count	InterPro_GO_Terms	GO_term
g42550	stomach	Scaffold_1906	3463716	3473833	Cabanes	Marchamalo	12.8357661180738	IPR029294 Helically-extended SH3 domain;IPR043443 FYN-binding protein 1/2-like;IPR030635 FYN-binding protein 1;IPR036028 SH3-like domain superfamily	NA	NA	3	InterPro_GO_Terms_4	go_process:GO:0006955 immune response
g42550	stomach	Scaffold_1906	3463716	3473833	Marchamalo	Santa_Pola	-12.618761836288	IPR029294 Helically-extended SH3 domain;IPR043443 FYN-binding protein 1/2-like;IPR030635 FYN-binding protein 1;IPR036028 SH3-like domain superfamily	NA	NA	3	InterPro_GO_Terms_4	go_process:GO:0006955 immune response
g17231	gill	Scaffold_716	1186947	1195650	Adra	Santa_Pola	-2.20491401918136	IPR001811 Chemokine interleukin-8-like domain;IPR039809 Chemokine beta/gamma/delta;IPR036048 Chemokine interleukin-8-like superfamily	NA	NA	2	InterPro_GO_Terms_2	go_process:GO:0006955 immune response
g17231	gill	Scaffold_716	1186947	1195650	Adra	Cabanes	-3.00406438258769	IPR001811 Chemokine interleukin-8-like domain;IPR039809 Chemokine beta/gamma/delta;IPR036048 Chemokine interleukin-8-like superfamily	NA	NA	2	InterPro_GO_Terms_2	go_process:GO:0006955 immune response
g26594	gill	Scaffold_1163	12513	26246	Adra	Marchamalo	-2.6100427730132	IPR003597 Immunoglobulin C1-set;IPR000353 MHC class II, beta chain, N-terminal;IPR014745 MHC class II, alpha/beta chain, N-terminal;IPR013783 Immunoglobulin-like fold;IPR007110 Immunoglobulin-like domain;IPR011162 MHC classes I/II-like antigen recognition protein;IPR036179 Immunoglobulin-like domain superfamily	NA	NA	2	InterPro_GO_Terms_4	go_process:GO:0006955 immune response
g26594	gill	Scaffold_1163	12513	26246	Adra	Cabanes	-2.81996134642388	IPR003597 Immunoglobulin C1-set;IPR000353 MHC class II, beta chain, N-terminal;IPR014745 MHC class II, alpha/beta chain, N-terminal;IPR013783 Immunoglobulin-like fold;IPR007110 Immunoglobulin-like domain;IPR011162 MHC classes I/II-like antigen recognition protein;IPR036179 Immunoglobulin-like domain superfamily	NA	NA	2	InterPro_GO_Terms_4	go_process:GO:0006955 immune response
g26597	gill	Scaffold_1163	41619	60206	Adra	Santa_Pola	2.61388101051135	IPR000353 MHC class II, beta chain, N-terminal;IPR003597 Immunoglobulin C1-set;IPR013783 Immunoglobulin-like fold;IPR014745 MHC class II, alpha/beta chain, N-terminal;IPR007110 Immunoglobulin-like domain;IPR036179 Immunoglobulin-like domain superfamily;IPR011162 MHC classes I/II-like antigen recognition protein	NA	NA	2	InterPro_GO_Terms_4	go_process:GO:0006955 immune response
g26597	gill	Scaffold_1163	41619	60206	Marchamalo	Santa_Pola	2.19965645024843	IPR000353 MHC class II, beta chain, N-terminal;IPR003597 Immunoglobulin C1-set;IPR013783 Immunoglobulin-like fold;IPR014745 MHC class II, alpha/beta chain, N-terminal;IPR007110 Immunoglobulin-like domain;IPR036179 Immunoglobulin-like domain superfamily;IPR011162 MHC classes I/II-like antigen recognition protein	NA	NA	2	InterPro_GO_Terms_4	go_process:GO:0006955 immune response
g59824	gill	Scaffold_2534	194834	197269	Adra	Santa_Pola	-2.54507114637501	IPR001811 Chemokine interleukin-8-like domain;IPR036048 Chemokine interleukin-8-like superfamily	NA	NA	2	InterPro_GO_Terms_2	go_process:GO:0006955 immune response
g59824	gill	Scaffold_2534	194834	197269	Adra	Cabanes	-3.30535755872683	IPR001811 Chemokine interleukin-8-like domain;IPR036048 Chemokine interleukin-8-like superfamily	NA	NA	2	InterPro_GO_Terms_2	go_process:GO:0006955 immune response
g62485	stomach	Scaffold_2620	641648	642790	Cabanes	Marchamalo	3.23060894899614	IPR004827 Basic-leucine zipper domain;IPR010533 Vertebrate interleukin-3 regulated transcription factor;IPR016743 Nuclear factor interleukin-3-regulated protein	Nuclear factor interleukin-3-regulated protein	negative regulation of transcription by RNA polymerase II;glomerular filtration;regulation of transcription, DNA-templated;transcription by RNA polymerase II;immune response;heart development;circadian rhythm;positive regulation of gene expression;pronephric glomerulus development;negative regulation of transcription, DNA-templated;positive regulation of transcription, DNA-templated;skeletal musc…	2	InterPro_GO_Terms_7	go_process:GO:0006955 immune response
g1284	gill	Scaffold_75	1930790	1965104	Adra	Cabanes	-2.53983194045419	IPR036048 Chemokine interleukin-8-like superfamily	NA	NA	1	InterPro_GO_Terms_2	go_process:GO:0006955 immune response
g17970	gill	Scaffold_727	3817317	3819220	Adra	Marchamalo	-4.72340851344674	IPR000098 Interleukin-10;IPR020443 Interleukin-10/19/20/22/24/26 family;IPR009079 Four-helical cytokine-like, core	NA	NA	1	InterPro_GO_Terms_3	go_process:GO:0006955 immune response
g19461	gill	Scaffold_804	2423574	2430882	Adra	Santa_Pola	-2.14089777181222	IPR004827 Basic-leucine zipper domain;IPR016743 Nuclear factor interleukin-3-regulated protein	Nuclear factor interleukin-3-regulated protein	negative regulation of transcription by RNA polymerase II;glomerular filtration;regulation of transcription, DNA-templated;transcription by RNA polymerase II;immune response;heart development;circadian rhythm;positive regulation of gene expression;pronephric glomerulus development;negative regulation of transcription, DNA-templated;positive regulation of transcription, DNA-templated;skeletal musc…	1	InterPro_GO_Terms_5	go_process:GO:0006955 immune response
g21972	gill	Scaffold_960	161448	162744	Cabanes	Marchamalo	2.26290422065762	IPR000975 Interleukin-1 family;IPR003296 Interleukin-1 beta;IPR008996 Cytokine IL1/FGF	NA	NA	1	InterPro_GO_Terms_4	go_process:GO:0006955 immune response
g22168	gill	Scaffold_972	95755	103626	Adra	Santa_Pola	-2.5566533511788	IPR000157 Toll/interleukin-1 receptor homology (TIR) domain;IPR003591 Leucine-rich repeat, typical subtype;IPR001611 Leucine-rich repeat;IPR032675 Leucine-rich repeat domain superfamily;IPR035897 Toll/interleukin-1 receptor homology (TIR) domain superfamily;IPR027185 Toll-like receptor 2;IPR017241 Toll-like receptor	NA	NA	1	InterPro_GO_Terms_11	go_process:GO:0006955 immune response
g42549	stomach	Scaffold_1906	3457863	3461937	Adra	Cabanes	-6.29557069470125	IPR001862 Membrane attack complex component/perforin/complement C9;IPR020864 Membrane attack complex component/perforin (MACPF) domain;IPR002172 Low-density lipoprotein (LDL) receptor class A repeat;IPR036055 LDL receptor-like superfamily;IPR037565 Complement component C8 alpha chain;IPR020863 Membrane attack complex component/perforin domain, conserved site	Complement component 8 subunit alpha	immune response;complement activation;complement activation, alternative pathway;complement activation, classical pathway;cytolysis;regulation of complement activation	1	InterPro_GO_Terms_2	go_process:GO:0006955 immune response
g49085	stomach	Scaffold_2154	682146	694113	Adra	Cabanes	-7.51379889493618	IPR001862 Membrane attack complex component/perforin/complement C9;IPR002172 Low-density lipoprotein (LDL) receptor class A repeat;IPR020864 Membrane attack complex component/perforin (MACPF) domain;IPR000884 Thrombospondin type-1 (TSP1) repeat;IPR036055 LDL receptor-like superfamily;IPR037567 Complement component C9;IPR023415 Low-density lipoprotein (LDL) receptor class A, conserved site;IPR0208…	Complement component C9	cell killing;complement activation, alternative pathway;complement activation, classical pathway;cytolysis;protein homooligomerization	1	InterPro_GO_Terms_2	go_process:GO:0006955 immune response
g59821	gill	Scaffold_2534	172357	174924	Cabanes	Marchamalo	2.29625368369128	IPR001811 Chemokine interleukin-8-like domain;IPR039809 Chemokine beta/gamma/delta;IPR036048 Chemokine interleukin-8-like superfamily	NA	NA	1	InterPro_GO_Terms_2	go_process:GO:0006955 immune response
g9957	gill	Scaffold_421	364284	368142	Adra	Santa_Pola	-3.10098177891194	IPR001089 CXC chemokine;IPR001811 Chemokine interleukin-8-like domain;IPR036048 Chemokine interleukin-8-like superfamily	NA	NA	1	InterPro_GO_Terms_2	go_process:GO:0006955 immune response
