# Supplementary material
Source: Research Square preprint supplement (doi:10.21203/rs.3.rs-9115348/v1)
Supplement: Supplementary file 8 [file b8056c4fea5eddba9fdffa8e.xlsx]

## Sheet: Hoja1
Sample	tissue	Population	Raw reads	Raw data (GB)	Clean reads w/o adapters	Clean data w/o adapters (GB)	NCBI/GenBank Accession number
AT30482_1		Cabanes	34383478	5.15752	8027779	1.1	SAMN55434958
AT30482_2		Cabanes	67190416	10.0786	21326882	3.1	SAMN55434959
AT30483_1		Cabanes	71107060	10.6661	17529202	2.6	SAMN55434960
AT30483_2		Cabanes	74590624	11.1886	28444523	4.2	SAMN55434961
AT30484_1		Cabanes	61984610	9.29769	22853599	3.3	SAMN55434962
AT30484_2		Cabanes	62883788	9.43257	15442176	2.2	SAMN55434963
AT30485_1		Cabanes	67248612	10.0873	23370937	3.4	SAMN55434964
AT30485_2		Cabanes	62774774	9.41622	18597897	2.7	SAMN55434965
AT30487_1		Santa Pola	49503742	7.42556	19467338	2.8	SAMN55434966
AT30487_2		Santa Pola	70666914	10.6	28099382	4.1	SAMN55434967
AT30488_1		Santa Pola	56557546	8.48363	17140029	2.5	SAMN55434968
AT30488_2		Santa Pola	90793054	13.619	26559446	3.9	SAMN55434969
AT30489_1		Santa Pola	68575276	10.2863	15417004	2.2	SAMN55434970
AT30489_2		Santa Pola	17293672	2.59405	3146004	0.46	SAMN55434971
AT30490_1		Santa Pola	78733776	11.8101	29071970	4.3	SAMN55434972
AT30490_2		Santa Pola	69211516	10.3817	20168676	3	SAMN55434973
AT30493_1		Marchamalo	80843436	12.1265	25480271	3.7	SAMN55434974
AT30493_2		Marchamalo	63115622	9.46734	15266007	2.2	SAMN55434975
AT30494_1		Marchamalo	76590124	11.4885	23839222	3.5	SAMN55434976
AT30494_2		Marchamalo	56544280	8.48164	17824663	2.6	SAMN55434977
AT30495_1		Marchamalo	64893210	9.73398	25382278	3.7	SAMN55434978
AT30495_2		Marchamalo	60611484	9.09172	13864652	2	SAMN55434979
AT30496_1		Marchamalo	63297538	9.49463	18299559	2.7	SAMN55434980
AT30496_2		Marchamalo	68602736	10.2904	22734894	3.3	SAMN55434981
AT30503_1		Adra	44303886	6.64558	13592352	2	SAMN55434982
AT30503_2		Adra	78269920	11.7405	9446623	1.3	SAMN55434983
AT30504_1		Adra	69158290	10.3737	25007430	3.7	SAMN55434984
AT30504_2		Adra	75349386	11.3024	13357559	1.9	SAMN55434985
AT30505_1		Adra	48406886	7.26103	18836274	2.7	SAMN55434986
AT30505_2		Adra	81480356	12.2221	31431060	4.6	SAMN55434987
AT30506_1		Adra	66904676	10.0357	24694381	3.6	SAMN55434988
AT30506_2		Adra	86885844	13.0329	26052576	3.8	SAMN55434989
