# Supplementary material
Source: Research Square preprint supplement (doi:10.21203/rs.3.rs-9115348/v1)
Supplement: Supplementary file 9 [file dff5ad504aa73acd9ab3850f.xlsx]

## Sheet: KEGG Analysis
GILL
Comparisson	Enrichment FDR	nGenes	Pathway Genes	Fold Enrichment	Pathway
Adra vs Santa Pola	0.0152978657422581	4	55	13.3716	Path:dre00270 Cysteine and methionine metabolism
Adra vs Marchamalo	0.00176187113788917	5	55	14.277	Path:dre00270 Cysteine and methionine metabolism
	0.00696039478908159	4	46	13.6562	Path:dre00260 Glycine serine and threonine metabolism
Adra vs Cabanes	0.0453955334214756	2	18	25.3813	Path:dre00450 Selenocompound metabolism
	0.0217710441304262	3	34	20.1557	Path:dre00020 Citrate cycle (TCA cycle)
	0.0446330249845561	3	55	12.4599	Path:dre00270 Cysteine and methionine metabolism
Marchamalo vs Santa Pola	0.0157191926072459	2	10	59.7089	Path:dre00920 Sulfur metabolism
GIT
Comparisson	Enrichment FDR	nGenes	Pathway Genes	Fold Enrichment	Pathway
Cabanes_Adra	0.0449213623192338	2	36	22.6374	Path:dre00500 Starch and sucrose metabolism
	0.0255561999416219	4	194	8.4015	Path:dre04210 Apoptosis
	3.63311e+09	17	1763	3.92912	Path:dre01100 Metabolic pathways
Cabanes_Marchamalo	0.0261330907543559	8	84	4.50112	Path:dre03018 RNA degradation
	0.0046191150053205	63	1763	1.68888	Path:dre01100 Metabolic pathways
Marchamalo_Adra	0.000592590909326435	3	20	62.8188	Path:dre00670 One carbon pool by folate
	0.00543760072075363	3	52	24.1611	Path:dre00380 Tryptophan metabolism
	0.00609846305850027	3	62	20.2641	Path:dre00590 Arachidonic acid metabolism
	0.00921200278006161	12	1763	2.85054	Path:dre01100 Metabolic pathways
Marchamalo vs Santa Pola	0.0492677106933492	2	38	30.5192	Path:dre03030 DNA replication

## Sheet: Molecular Function Gill
id	name	Population	Difference	With_Adra - FW	Without_Adra - FW	With_Cabanes - BW	Without_Cabanes - BW	With_SantaPola - BW	Without_SantaPola - BW	With_March - SW	Without_March - SW	definition
GO:0003676	nucleic acid binding	March - SW	66	NA	NA	NA	NA	NA	NA	142	76	Binding to a nucleic acid.
GO:0005515	protein binding	Adra - FW	35	89	54	NA	NA	NA	NA	NA	NA	Binding to a protein.
GO:0008168	methyltransferase activity	March - SW	19	NA	NA	NA	NA	NA	NA	39	20	Catalysis of the transfer of a methyl group to an acceptor molecule.
GO:0016706	2-oxoglutarate-dependent dioxygenase activity	March - SW	19	NA	NA	NA	NA	NA	NA	39	20	Catalysis of the reaction: A + 2-oxoglutarate + O2 = B + succinate + CO2. This is an oxidation-reduction (redox) reaction in which hydrogen or electrons are transferred from 2-oxoglutarate and one other donor, and one atom of oxygen is incorporated into each donor.
GO:0005524	ATP binding	Adra - FW	18	38	20	NA	NA	NA	NA	NA	NA	Binding to ATP, adenosine 5'-triphosphate, a universally important coenzyme and enzyme regulator.
GO:0008270	zinc ion binding	March - SW	17	NA	NA	NA	NA	NA	NA	50	33	Binding to a zinc ion (Zn).
GO:0003676	nucleic acid binding	Adra - FW	16	117	101	NA	NA	NA	NA	NA	NA	Binding to a nucleic acid.
GO:0005198	structural molecule activity	March - SW	15	NA	NA	NA	NA	NA	NA	18	3	The action of a molecule that contributes to the structural integrity of a complex.
GO:0005515	protein binding	March - SW	13	NA	NA	NA	NA	NA	NA	78	65	Binding to a protein.
GO:0008270	zinc ion binding	Adra - FW	13	48	35	NA	NA	NA	NA	NA	NA	Binding to a zinc ion (Zn).
GO:0004252	serine-type endopeptidase activity	Adra - FW	11	20	9	NA	NA	NA	NA	NA	NA	Catalysis of the hydrolysis of internal, alpha-peptide bonds in a polypeptide chain by a catalytic mechanism that involves a catalytic triad consisting of a serine nucleophile that is activated by a proton relay involving an acidic residue (e.g. aspartate or glutamate) and a basic residue (usually histidine).
GO:0005525	GTP binding	Adra - FW	11	23	12	NA	NA	NA	NA	NA	NA	Binding to GTP, guanosine triphosphate.
GO:0003677	DNA binding	Adra - FW	10	51	41	NA	NA	NA	NA	NA	NA	Any molecular function by which a gene product interacts selectively and non-covalently with DNA (deoxyribonucleic acid).
GO:0005506	iron ion binding	March - SW	10	NA	NA	NA	NA	NA	NA	11	1	Binding to an iron (Fe) ion.
GO:0020037	heme binding	March - SW	10	NA	NA	NA	NA	NA	NA	19	9	Binding to a heme, a compound composed of iron complexed in a porphyrin (tetrapyrrole) ring.
GO:0022857	transmembrane transporter activity	March - SW	10	NA	NA	NA	NA	NA	NA	20	10	Enables the transfer of a substance, usually a specific substance or a group of related substances, from one side of a membrane to the other.
GO:0046983	protein dimerization activity	March - SW	10	NA	NA	NA	NA	NA	NA	15	5	The formation of a protein dimer, a macromolecular structure consists of two noncovalently associated identical or nonidentical subunits.
GO:0003950	NAD+ ADP-ribosyltransferase activity	March - SW	9	NA	NA	NA	NA	NA	NA	12	3	Catalysis of the reaction: NAD+ + (ADP-D-ribosyl)(n)-acceptor = nicotinamide + (ADP-D-ribosyl)(n+1)-acceptor.
GO:0008168	methyltransferase activity	Adra - FW	9	34	25	NA	NA	NA	NA	NA	NA	Catalysis of the transfer of a methyl group to an acceptor molecule.
GO:0008234	cysteine-type peptidase activity	SantaPola - BW	9	NA	NA	NA	NA	14	5	NA	NA	Catalysis of the hydrolysis of peptide bonds in a polypeptide chain by a mechanism in which the sulfhydryl group of a cysteine residue at the active center acts as a nucleophile.
GO:0008289	lipid binding	March - SW	9	NA	NA	NA	NA	NA	NA	12	3	Binding to a lipid.
GO:0016706	2-oxoglutarate-dependent dioxygenase activity	Adra - FW	9	34	25	NA	NA	NA	NA	NA	NA	Catalysis of the reaction: A + 2-oxoglutarate + O2 = B + succinate + CO2. This is an oxidation-reduction (redox) reaction in which hydrogen or electrons are transferred from 2-oxoglutarate and one other donor, and one atom of oxygen is incorporated into each donor.
GO:0016887	ATPase	Adra - FW	9	12	3	NA	NA	NA	NA	NA	NA	Catalysis of the reaction: ATP + H2O = ADP + H+ phosphate. ATP hydrolysis is used in some reactions as an energy source, for example to catalyze a reaction or drive transport against a concentration gradient.
GO:0004497	monooxygenase activity	March - SW	8	NA	NA	NA	NA	NA	NA	9	1	Catalysis of the incorporation of one atom from molecular oxygen into a compound and the reduction of the other atom of oxygen to water.
GO:0005524	ATP binding	March - SW	8	NA	NA	NA	NA	NA	NA	33	25	Binding to ATP, adenosine 5'-triphosphate, a universally important coenzyme and enzyme regulator.
GO:0016705	oxidoreductase activity, acting on paired donors, with incorporation or reduction of molecular oxygen	March - SW	8	NA	NA	NA	NA	NA	NA	9	1	Catalysis of an oxidation-reduction (redox) reaction in which hydrogen or electrons are transferred from each of two donors, and molecular oxygen is reduced or incorporated into a donor.
GO:0003700	DNA-binding transcription factor activity	Adra - FW	6	11	5	NA	NA	NA	NA	NA	NA	A transcription regulator activity that modulates transcription of gene sets via selective and non-covalent binding to a specific double-stranded genomic DNA sequence (sometimes referred to as a motif) within a cis-regulatory region. Regulatory regions include promoters (proximal and distal) and enhancers. Genes are transcriptional units, and include bacterial operons.
GO:0003824	catalytic activity	March - SW	6	NA	NA	NA	NA	NA	NA	16	10	Catalysis of a biochemical reaction at physiological temperatures. In biologically catalyzed reactions, the reactants are known as substrates, and the catalysts are naturally occurring macromolecular substances known as enzymes. Enzymes possess specific binding sites for substrates, and are usually composed wholly or largely of protein, but RNA that has catalytic activity (ribozyme) is often also…
GO:0004523	RNA-DNA hybrid ribonuclease activity	March - SW	6	NA	NA	NA	NA	NA	NA	15	9	Catalysis of the endonucleolytic cleavage of RNA in RNA-DNA hybrids to 5'-phosphomonoesters.
GO:0005216	ion channel activity	March - SW	6	NA	NA	NA	NA	NA	NA	13	7	Enables the facilitated diffusion of a monoatomic ion (by an energy-independent process) by passage through a transmembrane aqueous pore or channel without evidence for a carrier-mediated mechanism. May be either selective (it enables passage of a specific ion only) or non-selective (it enables passage of two or more ions of same charge but different size).
GO:0005509	calcium ion binding	Adra - FW	6	16	10	NA	NA	NA	NA	NA	NA	Binding to a calcium ion (Ca2+).
GO:0020037	heme binding	Adra - FW	6	17	11	NA	NA	NA	NA	NA	NA	Binding to a heme, a compound composed of iron complexed in a porphyrin (tetrapyrrole) ring.
GO:0022857	transmembrane transporter activity	Adra - FW	6	18	12	NA	NA	NA	NA	NA	NA	Enables the transfer of a substance, usually a specific substance or a group of related substances, from one side of a membrane to the other.
GO:0035804	structural constituent of egg coat	Adra - FW	6	10	4	NA	NA	NA	NA	NA	NA	The action of a molecule that contributes to the structural integrity of an egg coat. An egg coat is a specialized extracellular matrix that surrounds the ovum of animals. The egg coat provides structural support and can play an essential role in oogenesis, fertilization and early development.
GO:0004842	ubiquitin-protein transferase activity	Cabanes - BW	5	NA	NA	9	4	NA	NA	NA	NA	Catalysis of the transfer of ubiquitin from one protein to another via the reaction X-Ub + Y = Y-Ub + X, where both X-Ub and Y-Ub are covalent linkages.
GO:0008009	chemokine activity	Adra - FW	5	6	1	NA	NA	NA	NA	NA	NA	The function of a family of small chemotactic cytokines; their name is derived from their ability to induce directed chemotaxis in nearby responsive cells. All chemokines possess a number of conserved cysteine residues involved in intramolecular disulfide bond formation. Some chemokines are considered pro-inflammatory and can be induced during an immune response to recruit cells of the immune sys…
GO:0008061	chitin binding	Cabanes - BW	5	NA	NA	6	1	NA	NA	NA	NA	Binding to chitin, a linear polysaccharide consisting of beta-(1->4)-linked N-acetyl-D-glucosamine residues.
GO:0008061	chitin binding	March - SW	5	NA	NA	NA	NA	NA	NA	6	1	Binding to chitin, a linear polysaccharide consisting of beta-(1->4)-linked N-acetyl-D-glucosamine residues.
GO:0000166	nucleotide binding	March - SW	4	NA	NA	NA	NA	NA	NA	6	2	Binding to a nucleotide, any compound consisting of a nucleoside that is esterified with (ortho)phosphate or an oligophosphate at any hydroxyl group on the ribose or deoxyribose.
GO:0000981	DNA-binding transcription factor activity, RNA polymerase II-specific	Adra - FW	4	7	3	NA	NA	NA	NA	NA	NA	A DNA-binding transcription factor activity that modulates the transcription of specific gene sets transcribed by RNA polymerase II.
GO:0000981	DNA-binding transcription factor activity, RNA polymerase II-specific	SantaPola - BW	4	NA	NA	NA	NA	7	3	NA	NA	A DNA-binding transcription factor activity that modulates the transcription of specific gene sets transcribed by RNA polymerase II.
GO:0003700	DNA-binding transcription factor activity	SantaPola - BW	4	NA	NA	NA	NA	10	6	NA	NA	A transcription regulator activity that modulates transcription of gene sets via selective and non-covalent binding to a specific double-stranded genomic DNA sequence (sometimes referred to as a motif) within a cis-regulatory region. Regulatory regions include promoters (proximal and distal) and enhancers. Genes are transcriptional units, and include bacterial operons.
GO:0003774	motor activity	Adra - FW	4	5	1	NA	NA	NA	NA	NA	NA	Generation of force resulting in movement, for example along a microfilament or microtubule, or in torque resulting in membrane scission or rotation of a flagellum. The energy required is obtained either from the hydrolysis of a nucleoside triphosphate or by an electrochemical proton gradient (proton-motive force).
GO:0003824	catalytic activity	Adra - FW	4	15	11	NA	NA	NA	NA	NA	NA	Catalysis of a biochemical reaction at physiological temperatures. In biologically catalyzed reactions, the reactants are known as substrates, and the catalysts are naturally occurring macromolecular substances known as enzymes. Enzymes possess specific binding sites for substrates, and are usually composed wholly or largely of protein, but RNA that has catalytic activity (ribozyme) is often also…
GO:0004523	RNA-DNA hybrid ribonuclease activity	SantaPola - BW	4	NA	NA	NA	NA	14	10	NA	NA	Catalysis of the endonucleolytic cleavage of RNA in RNA-DNA hybrids to 5'-phosphomonoesters.
GO:0004867	serine-type endopeptidase inhibitor activity	Adra - FW	4	5	1	NA	NA	NA	NA	NA	NA	Binds to and stops, prevents or reduces the activity of a serine-type endopeptidase.
GO:0004888	transmembrane signaling receptor activity	Adra - FW	4	8	4	NA	NA	NA	NA	NA	NA	Combining with an extracellular or intracellular signal and transmitting the signal from one side of the membrane to the other to initiate a change in cell activity or state as part of signal transduction.
GO:0004930	G protein-coupled receptor activity	Cabanes - BW	4	NA	NA	12	8	NA	NA	NA	NA	Combining with an extracellular signal and transmitting the signal across the membrane by activating an associated G-protein; promotes the exchange of GDP for GTP on the alpha subunit of a heterotrimeric G-protein complex.
GO:0004930	G protein-coupled receptor activity	March - SW	4	NA	NA	NA	NA	NA	NA	12	8	Combining with an extracellular signal and transmitting the signal across the membrane by activating an associated G-protein; promotes the exchange of GDP for GTP on the alpha subunit of a heterotrimeric G-protein complex.
GO:0005452	inorganic anion exchanger activity	Adra - FW	4	5	1	NA	NA	NA	NA	NA	NA	Enables the transfer of a solute or solutes from one side of a membrane to the other according to the reaction: inorganic anion(out) + solute(in) = inorganic anion (in) + solute(out).
GO:0008237	metallopeptidase activity	Adra - FW	4	9	5	NA	NA	NA	NA	NA	NA	Catalysis of the hydrolysis of peptide bonds by a mechanism in which water acts as a nucleophile, one or two metal ions hold the water molecule in place, and charged amino acid side chains are ligands for the metal ions.
GO:0008373	sialyltransferase activity	Cabanes - BW	4	NA	NA	6	2	NA	NA	NA	NA	Catalysis of the transfer of sialic acid to an acceptor molecule, typically the terminal portions of the sialylated glycolipids (gangliosides) or to the N- or O-linked sugar chains of glycoproteins.
GO:0008509	anion transmembrane transporter activity	Adra - FW	4	5	1	NA	NA	NA	NA	NA	NA	Enables the transfer of a negatively charged ion from one side of a membrane to the other.
GO:0015377	cation:chloride symporter activity	March - SW	4	NA	NA	NA	NA	NA	NA	5	1	Enables the transfer of a solute or solutes from one side of a membrane to the other according to the reaction: cation(out) + Cl-(out) = cation(in) + Cl-(in).
GO:0016787	hydrolase activity	March - SW	4	NA	NA	NA	NA	NA	NA	6	2	Catalysis of the hydrolysis of various bonds, e.g. C-O, C-N, C-C, phosphoric anhydride bonds, etc.
GO:0019825	oxygen binding	Adra - FW	4	8	4	NA	NA	NA	NA	NA	NA	Binding to oxygen (O2).
GO:0035804	structural constituent of egg coat	SantaPola - BW	4	NA	NA	NA	NA	9	5	NA	NA	The action of a molecule that contributes to the structural integrity of an egg coat. An egg coat is a specialized extracellular matrix that surrounds the ovum of animals. The egg coat provides structural support and can play an essential role in oogenesis, fertilization and early development.
GO:0004222	metalloendopeptidase activity	Adra - FW	3	9	6	NA	NA	NA	NA	NA	NA	Catalysis of the hydrolysis of internal, alpha-peptide bonds in a polypeptide chain by a mechanism in which water acts as a nucleophile, one or two metal ions hold the water molecule in place, and charged amino acid side chains are ligands for the metal ions.
GO:0015299	solute:proton antiporter activity	March - SW	3	NA	NA	NA	NA	NA	NA	5	2	OBSOLETE. Enables the transfer of a solute or solutes from one side of a membrane to the other according to the reaction: solute(out) + H+(in) = solute(in) + H+(out).
GO:0015385	sodium:proton antiporter activity	March - SW	3	NA	NA	NA	NA	NA	NA	5	2	Enables the transfer of a solute or solutes from one side of a membrane to the other according to the reaction: Na+(out) + H+(in) = Na+(in) + H+(out).
GO:0016491	oxidoreductase activity	March - SW	3	NA	NA	NA	NA	NA	NA	5	2	Catalysis of an oxidation-reduction (redox) reaction, a reversible chemical reaction in which the oxidation state of an atom or atoms within a molecule is altered. One substrate acts as a hydrogen or electron donor and becomes oxidized, while the other acts as hydrogen or electron acceptor and becomes reduced.
GO:0016887	ATPase	March - SW	3	NA	NA	NA	NA	NA	NA	9	6	Catalysis of the reaction: ATP + H2O = ADP + H+ phosphate. ATP hydrolysis is used in some reactions as an energy source, for example to catalyze a reaction or drive transport against a concentration gradient.
GO:0046872	metal ion binding	Adra - FW	3	13	10	NA	NA	NA	NA	NA	NA	Binding to a metal ion.
GO:0003779	actin binding	Cabanes - BW	-3	NA	NA	3	6	NA	NA	NA	NA	Binding to monomeric or multimeric forms of actin, including actin filaments.
GO:0003950	NAD+ ADP-ribosyltransferase activity	SantaPola - BW	-3	NA	NA	NA	NA	6	9	NA	NA	Catalysis of the reaction: NAD+ + (ADP-D-ribosyl)(n)-acceptor = nicotinamide + (ADP-D-ribosyl)(n+1)-acceptor.
GO:0004842	ubiquitin-protein transferase activity	SantaPola - BW	-3	NA	NA	NA	NA	5	8	NA	NA	Catalysis of the transfer of ubiquitin from one protein to another via the reaction X-Ub + Y = Y-Ub + X, where both X-Ub and Y-Ub are covalent linkages.
GO:0005198	structural molecule activity	Cabanes - BW	-3	NA	NA	9	12	NA	NA	NA	NA	The action of a molecule that contributes to the structural integrity of a complex.
GO:0005525	GTP binding	Cabanes - BW	-3	NA	NA	16	19	NA	NA	NA	NA	Binding to GTP, guanosine triphosphate.
GO:0008234	cysteine-type peptidase activity	Cabanes - BW	-3	NA	NA	8	11	NA	NA	NA	NA	Catalysis of the hydrolysis of peptide bonds in a polypeptide chain by a mechanism in which the sulfhydryl group of a cysteine residue at the active center acts as a nucleophile.
GO:0008234	cysteine-type peptidase activity	Adra - FW	-3	8	11	NA	NA	NA	NA	NA	NA	Catalysis of the hydrolysis of peptide bonds in a polypeptide chain by a mechanism in which the sulfhydryl group of a cysteine residue at the active center acts as a nucleophile.
GO:0008234	cysteine-type peptidase activity	March - SW	-3	NA	NA	NA	NA	NA	NA	8	11	Catalysis of the hydrolysis of peptide bonds in a polypeptide chain by a mechanism in which the sulfhydryl group of a cysteine residue at the active center acts as a nucleophile.
GO:0008270	zinc ion binding	Cabanes - BW	-3	NA	NA	40	43	NA	NA	NA	NA	Binding to a zinc ion (Zn).
GO:0008289	lipid binding	SantaPola - BW	-3	NA	NA	NA	NA	6	9	NA	NA	Binding to a lipid.
GO:0015299	solute:proton antiporter activity	SantaPola - BW	-3	NA	NA	NA	NA	2	5	NA	NA	OBSOLETE. Enables the transfer of a solute or solutes from one side of a membrane to the other according to the reaction: solute(out) + H+(in) = solute(in) + H+(out).
GO:0015385	sodium:proton antiporter activity	SantaPola - BW	-3	NA	NA	NA	NA	2	5	NA	NA	Enables the transfer of a solute or solutes from one side of a membrane to the other according to the reaction: Na+(out) + H+(in) = Na+(in) + H+(out).
GO:0016491	oxidoreductase activity	SantaPola - BW	-3	NA	NA	NA	NA	2	5	NA	NA	Catalysis of an oxidation-reduction (redox) reaction, a reversible chemical reaction in which the oxidation state of an atom or atoms within a molecule is altered. One substrate acts as a hydrogen or electron donor and becomes oxidized, while the other acts as hydrogen or electron acceptor and becomes reduced.
GO:0046872	metal ion binding	Cabanes - BW	-3	NA	NA	10	13	NA	NA	NA	NA	Binding to a metal ion.
GO:0000981	DNA-binding transcription factor activity, RNA polymerase II-specific	March - SW	-4	NA	NA	NA	NA	NA	NA	3	7	A DNA-binding transcription factor activity that modulates the transcription of specific gene sets transcribed by RNA polymerase II.
GO:0000981	DNA-binding transcription factor activity, RNA polymerase II-specific	Cabanes - BW	-4	NA	NA	3	7	NA	NA	NA	NA	A DNA-binding transcription factor activity that modulates the transcription of specific gene sets transcribed by RNA polymerase II.
GO:0003700	DNA-binding transcription factor activity	Cabanes - BW	-4	NA	NA	6	10	NA	NA	NA	NA	A transcription regulator activity that modulates transcription of gene sets via selective and non-covalent binding to a specific double-stranded genomic DNA sequence (sometimes referred to as a motif) within a cis-regulatory region. Regulatory regions include promoters (proximal and distal) and enhancers. Genes are transcriptional units, and include bacterial operons.
GO:0003774	motor activity	SantaPola - BW	-4	NA	NA	NA	NA	1	5	NA	NA	Generation of force resulting in movement, for example along a microfilament or microtubule, or in torque resulting in membrane scission or rotation of a flagellum. The energy required is obtained either from the hydrolysis of a nucleoside triphosphate or by an electrochemical proton gradient (proton-motive force).
GO:0004523	RNA-DNA hybrid ribonuclease activity	Adra - FW	-4	10	14	NA	NA	NA	NA	NA	NA	Catalysis of the endonucleolytic cleavage of RNA in RNA-DNA hybrids to 5'-phosphomonoesters.
GO:0005216	ion channel activity	SantaPola - BW	-4	NA	NA	NA	NA	8	12	NA	NA	Enables the facilitated diffusion of a monoatomic ion (by an energy-independent process) by passage through a transmembrane aqueous pore or channel without evidence for a carrier-mediated mechanism. May be either selective (it enables passage of a specific ion only) or non-selective (it enables passage of two or more ions of same charge but different size).
GO:0005452	inorganic anion exchanger activity	SantaPola - BW	-4	NA	NA	NA	NA	1	5	NA	NA	Enables the transfer of a solute or solutes from one side of a membrane to the other according to the reaction: inorganic anion(out) + solute(in) = inorganic anion (in) + solute(out).
GO:0008373	sialyltransferase activity	March - SW	-4	NA	NA	NA	NA	NA	NA	2	6	Catalysis of the transfer of sialic acid to an acceptor molecule, typically the terminal portions of the sialylated glycolipids (gangliosides) or to the N- or O-linked sugar chains of glycoproteins.
GO:0008509	anion transmembrane transporter activity	SantaPola - BW	-4	NA	NA	NA	NA	1	5	NA	NA	Enables the transfer of a negatively charged ion from one side of a membrane to the other.
GO:0015377	cation:chloride symporter activity	SantaPola - BW	-4	NA	NA	NA	NA	1	5	NA	NA	Enables the transfer of a solute or solutes from one side of a membrane to the other according to the reaction: cation(out) + Cl-(out) = cation(in) + Cl-(in).
GO:0016787	hydrolase activity	SantaPola - BW	-4	NA	NA	NA	NA	2	6	NA	NA	Catalysis of the hydrolysis of various bonds, e.g. C-O, C-N, C-C, phosphoric anhydride bonds, etc.
GO:0019825	oxygen binding	SantaPola - BW	-4	NA	NA	NA	NA	4	8	NA	NA	Binding to oxygen (O2).
GO:0020037	heme binding	Cabanes - BW	-4	NA	NA	12	16	NA	NA	NA	NA	Binding to a heme, a compound composed of iron complexed in a porphyrin (tetrapyrrole) ring.
GO:0035804	structural constituent of egg coat	Cabanes - BW	-4	NA	NA	5	9	NA	NA	NA	NA	The action of a molecule that contributes to the structural integrity of an egg coat. An egg coat is a specialized extracellular matrix that surrounds the ovum of animals. The egg coat provides structural support and can play an essential role in oogenesis, fertilization and early development.
GO:0003950	NAD+ ADP-ribosyltransferase activity	Cabanes - BW	-5	NA	NA	5	10	NA	NA	NA	NA	Catalysis of the reaction: NAD+ + (ADP-D-ribosyl)(n)-acceptor = nicotinamide + (ADP-D-ribosyl)(n+1)-acceptor.
GO:0004252	serine-type endopeptidase activity	SantaPola - BW	-5	NA	NA	NA	NA	12	17	NA	NA	Catalysis of the hydrolysis of internal, alpha-peptide bonds in a polypeptide chain by a catalytic mechanism that involves a catalytic triad consisting of a serine nucleophile that is activated by a proton relay involving an acidic residue (e.g. aspartate or glutamate) and a basic residue (usually histidine).
GO:0005198	structural molecule activity	Adra - FW	-5	8	13	NA	NA	NA	NA	NA	NA	The action of a molecule that contributes to the structural integrity of a complex.
GO:0008009	chemokine activity	March - SW	-5	NA	NA	NA	NA	NA	NA	1	6	The function of a family of small chemotactic cytokines; their name is derived from their ability to induce directed chemotaxis in nearby responsive cells. All chemokines possess a number of conserved cysteine residues involved in intramolecular disulfide bond formation. Some chemokines are considered pro-inflammatory and can be induced during an immune response to recruit cells of the immune sys…
GO:0008061	chitin binding	SantaPola - BW	-5	NA	NA	NA	NA	1	6	NA	NA	Binding to chitin, a linear polysaccharide consisting of beta-(1->4)-linked N-acetyl-D-glucosamine residues.
GO:0008061	chitin binding	Adra - FW	-5	1	6	NA	NA	NA	NA	NA	NA	Binding to chitin, a linear polysaccharide consisting of beta-(1->4)-linked N-acetyl-D-glucosamine residues.
GO:0008289	lipid binding	Adra - FW	-5	5	10	NA	NA	NA	NA	NA	NA	Binding to a lipid.
GO:0016887	ATPase	Cabanes - BW	-5	NA	NA	5	10	NA	NA	NA	NA	Catalysis of the reaction: ATP + H2O = ADP + H+ phosphate. ATP hydrolysis is used in some reactions as an energy source, for example to catalyze a reaction or drive transport against a concentration gradient.
GO:0003700	DNA-binding transcription factor activity	March - SW	-6	NA	NA	NA	NA	NA	NA	5	11	A transcription regulator activity that modulates transcription of gene sets via selective and non-covalent binding to a specific double-stranded genomic DNA sequence (sometimes referred to as a motif) within a cis-regulatory region. Regulatory regions include promoters (proximal and distal) and enhancers. Genes are transcriptional units, and include bacterial operons.
GO:0004497	monooxygenase activity	SantaPola - BW	-6	NA	NA	NA	NA	2	8	NA	NA	Catalysis of the incorporation of one atom from molecular oxygen into a compound and the reduction of the other atom of oxygen to water.
GO:0004523	RNA-DNA hybrid ribonuclease activity	Cabanes - BW	-6	NA	NA	9	15	NA	NA	NA	NA	Catalysis of the endonucleolytic cleavage of RNA in RNA-DNA hybrids to 5'-phosphomonoesters.
GO:0005509	calcium ion binding	Cabanes - BW	-6	NA	NA	10	16	NA	NA	NA	NA	Binding to a calcium ion (Ca2+).
GO:0016705	oxidoreductase activity, acting on paired donors, with incorporation or reduction of molecular oxygen	SantaPola - BW	-6	NA	NA	NA	NA	2	8	NA	NA	Catalysis of an oxidation-reduction (redox) reaction in which hydrogen or electrons are transferred from each of two donors, and molecular oxygen is reduced or incorporated into a donor.
GO:0022857	transmembrane transporter activity	Cabanes - BW	-6	NA	NA	12	18	NA	NA	NA	NA	Enables the transfer of a substance, usually a specific substance or a group of related substances, from one side of a membrane to the other.
GO:0035804	structural constituent of egg coat	March - SW	-6	NA	NA	NA	NA	NA	NA	4	10	The action of a molecule that contributes to the structural integrity of an egg coat. An egg coat is a specialized extracellular matrix that surrounds the ovum of animals. The egg coat provides structural support and can play an essential role in oogenesis, fertilization and early development.
GO:0004252	serine-type endopeptidase activity	Cabanes - BW	-7	NA	NA	11	18	NA	NA	NA	NA	Catalysis of the hydrolysis of internal, alpha-peptide bonds in a polypeptide chain by a catalytic mechanism that involves a catalytic triad consisting of a serine nucleophile that is activated by a proton relay involving an acidic residue (e.g. aspartate or glutamate) and a basic residue (usually histidine).
GO:0005198	structural molecule activity	SantaPola - BW	-7	NA	NA	NA	NA	7	14	NA	NA	The action of a molecule that contributes to the structural integrity of a complex.
GO:0005525	GTP binding	March - SW	-7	NA	NA	NA	NA	NA	NA	14	21	Binding to GTP, guanosine triphosphate.
GO:0016887	ATPase	SantaPola - BW	-7	NA	NA	NA	NA	4	11	NA	NA	Catalysis of the reaction: ATP + H2O = ADP + H+ phosphate. ATP hydrolysis is used in some reactions as an energy source, for example to catalyze a reaction or drive transport against a concentration gradient.
GO:0005506	iron ion binding	SantaPola - BW	-8	NA	NA	NA	NA	2	10	NA	NA	Binding to an iron (Fe) ion.
GO:0046983	protein dimerization activity	SantaPola - BW	-8	NA	NA	NA	NA	6	14	NA	NA	The formation of a protein dimer, a macromolecular structure consists of two noncovalently associated identical or nonidentical subunits.
GO:0008168	methyltransferase activity	SantaPola - BW	-9	NA	NA	NA	NA	25	34	NA	NA	Catalysis of the transfer of a methyl group to an acceptor molecule.
GO:0016706	2-oxoglutarate-dependent dioxygenase activity	SantaPola - BW	-9	NA	NA	NA	NA	25	34	NA	NA	Catalysis of the reaction: A + 2-oxoglutarate + O2 = B + succinate + CO2. This is an oxidation-reduction (redox) reaction in which hydrogen or electrons are transferred from 2-oxoglutarate and one other donor, and one atom of oxygen is incorporated into each donor.
GO:0003824	catalytic activity	SantaPola - BW	-10	NA	NA	NA	NA	8	18	NA	NA	Catalysis of a biochemical reaction at physiological temperatures. In biologically catalyzed reactions, the reactants are known as substrates, and the catalysts are naturally occurring macromolecular substances known as enzymes. Enzymes possess specific binding sites for substrates, and are usually composed wholly or largely of protein, but RNA that has catalytic activity (ribozyme) is often also…
GO:0004930	G protein-coupled receptor activity	SantaPola - BW	-10	NA	NA	NA	NA	5	15	NA	NA	Combining with an extracellular signal and transmitting the signal across the membrane by activating an associated G-protein; promotes the exchange of GDP for GTP on the alpha subunit of a heterotrimeric G-protein complex.
GO:0022857	transmembrane transporter activity	SantaPola - BW	-10	NA	NA	NA	NA	10	20	NA	NA	Enables the transfer of a substance, usually a specific substance or a group of related substances, from one side of a membrane to the other.
GO:0003677	DNA binding	SantaPola - BW	-12	NA	NA	NA	NA	40	52	NA	NA	Any molecular function by which a gene product interacts selectively and non-covalently with DNA (deoxyribonucleic acid).
GO:0005524	ATP binding	Cabanes - BW	-12	NA	NA	23	35	NA	NA	NA	NA	Binding to ATP, adenosine 5'-triphosphate, a universally important coenzyme and enzyme regulator.
GO:0020037	heme binding	SantaPola - BW	-12	NA	NA	NA	NA	8	20	NA	NA	Binding to a heme, a compound composed of iron complexed in a porphyrin (tetrapyrrole) ring.
GO:0005515	protein binding	Cabanes - BW	-13	NA	NA	65	78	NA	NA	NA	NA	Binding to a protein.
GO:0005524	ATP binding	SantaPola - BW	-14	NA	NA	NA	NA	22	36	NA	NA	Binding to ATP, adenosine 5'-triphosphate, a universally important coenzyme and enzyme regulator.
GO:0008168	methyltransferase activity	Cabanes - BW	-19	NA	NA	20	39	NA	NA	NA	NA	Catalysis of the transfer of a methyl group to an acceptor molecule.
GO:0016706	2-oxoglutarate-dependent dioxygenase activity	Cabanes - BW	-19	NA	NA	20	39	NA	NA	NA	NA	Catalysis of the reaction: A + 2-oxoglutarate + O2 = B + succinate + CO2. This is an oxidation-reduction (redox) reaction in which hydrogen or electrons are transferred from 2-oxoglutarate and one other donor, and one atom of oxygen is incorporated into each donor.
GO:0003676	nucleic acid binding	Cabanes - BW	-22	NA	NA	98	120	NA	NA	NA	NA	Binding to a nucleic acid.
GO:0008270	zinc ion binding	SantaPola - BW	-27	NA	NA	NA	NA	28	55	NA	NA	Binding to a zinc ion (Zn).
GO:0005515	protein binding	SantaPola - BW	-35	NA	NA	NA	NA	54	89	NA	NA	Binding to a protein.
GO:0003676	nucleic acid binding	SantaPola - BW	-60	NA	NA	NA	NA	79	139	NA	NA	Binding to a nucleic acid.

## Sheet: Biological Process Gill
id	name	Population	Difference	With_Adra - FW	Without_Adra - FW	With_Cabanes - BW	Without_Cabanes - BW	With_SantaPola - BW	Without_SantaPola - BW	With_March - SW	Without_March - SW	definition
GO:0015074	DNA integration	March - SW	52	NA	NA	NA	NA	NA	NA	100	48	The process in which a DNA segment is incorporated into another, usually larger, DNA molecule such as a chromosome.
GO:0055085	transmembrane transport	Adra - FW	18	37	19	NA	NA	NA	NA	NA	NA	The process in which a solute is transported across a lipid bilayer, from one side of a membrane to the other.
GO:0015074	DNA integration	Adra - FW	16	82	66	NA	NA	NA	NA	NA	NA	The process in which a DNA segment is incorporated into another, usually larger, DNA molecule such as a chromosome.
GO:0006811	ion transport	March - SW	14	NA	NA	NA	NA	NA	NA	30	16	The directed movement of a monoatomic ion into, out of or within a cell, or between cells, by means of some agent such as a transporter or pore. Monatomic ions (also called simple ions) are ions consisting of exactly one atom.
GO:0055085	transmembrane transport	March - SW	14	NA	NA	NA	NA	NA	NA	35	21	The process in which a solute is transported across a lipid bilayer, from one side of a membrane to the other.
GO:0006508	proteolysis	Adra - FW	11	40	29	NA	NA	NA	NA	NA	NA	The hydrolysis of proteins into smaller polypeptides and/or amino acids by cleavage of their peptide bonds.
GO:0006813	potassium ion transport	March - SW	9	NA	NA	NA	NA	NA	NA	11	2	The directed movement of potassium ions (K+) into, out of or within a cell, or between cells, by means of some agent such as a transporter or pore.
GO:0006955	immune response	Adra - FW	9	12	3	NA	NA	NA	NA	NA	NA	Any immune system process that functions in the calibrated response of an organism to a potential internal or invasive threat.
GO:0006355	regulation of transcription, DNA-templated	Adra - FW	8	16	8	NA	NA	NA	NA	NA	NA	Any process that modulates the frequency, rate or extent of cellular DNA-templated transcription.
GO:0006812	cation transport	Adra - FW	6	9	3	NA	NA	NA	NA	NA	NA	The directed movement of a monoatomic cation, into, out of or within a cell, or between cells, by means of some agent such as a transporter or pore. Monatomic cations (also called simple cations) are positively charged ions consisting of exactly one atom.
GO:0006869	lipid transport	March - SW	6	NA	NA	NA	NA	NA	NA	7	1	The directed movement of lipids into, out of or within a cell, or between cells, by means of some agent such as a transporter or pore. Lipids are compounds soluble in an organic solvent but not, or sparingly, in an aqueous solvent.
GO:0007339	binding of sperm to zona pellucida	Adra - FW	6	10	4	NA	NA	NA	NA	NA	NA	The process in which the sperm binds to the zona pellucida glycoprotein layer of the egg. The process begins with the attachment of the sperm plasma membrane to the zona pellucida and includes attachment of the acrosome inner membrane to the zona pellucida after the acrosomal reaction takes place.
GO:0035803	egg coat formation	Adra - FW	6	10	4	NA	NA	NA	NA	NA	NA	Construction of an egg coat, a specialized extracellular matrix that surrounds the ovum of animals. The egg coat provides structural support and can play an essential role in oogenesis, fertilization and early development.
GO:0006357	regulation of transcription by RNA polymerase II	Adra - FW	5	6	1	NA	NA	NA	NA	NA	NA	Any process that modulates the frequency, rate or extent of transcription mediated by RNA polymerase II.
GO:0007186	G protein-coupled receptor signaling pathway	Cabanes - BW	5	NA	NA	13	8	NA	NA	NA	NA	The series of molecular signals initiated by a ligand binding to its receptor, in which the activated receptor promotes the exchange of GDP for GTP on the alpha-subunit of an associated heterotrimeric G-protein complex. The GTP-bound activated alpha-G-protein then dissociates from the beta- and gamma-subunits to further transmit the signal within the cell. The pathway begins with receptor-ligand …
GO:0007186	G protein-coupled receptor signaling pathway	Adra - FW	5	13	8	NA	NA	NA	NA	NA	NA	The series of molecular signals initiated by a ligand binding to its receptor, in which the activated receptor promotes the exchange of GDP for GTP on the alpha-subunit of an associated heterotrimeric G-protein complex. The GTP-bound activated alpha-G-protein then dissociates from the beta- and gamma-subunits to further transmit the signal within the cell. The pathway begins with receptor-ligand …
GO:0034220	ion transmembrane transport	Adra - FW	5	8	3	NA	NA	NA	NA	NA	NA	A process in which a monoatomic ion is transported across a membrane. Monatomic ions (also called simple ions) are ions consisting of exactly one atom.
GO:0006313	transposition, DNA-mediated	March - SW	4	NA	NA	NA	NA	NA	NA	21	17	A type of transposition in which a transposable element (transposon) is moved to another part of a genome, either by a cut-and-paste mechanism or a replicative mechanism.
GO:0006812	cation transport	March - SW	4	NA	NA	NA	NA	NA	NA	8	4	The directed movement of a monoatomic cation, into, out of or within a cell, or between cells, by means of some agent such as a transporter or pore. Monatomic cations (also called simple cations) are positively charged ions consisting of exactly one atom.
GO:0006820	anion transport	Adra - FW	4	5	1	NA	NA	NA	NA	NA	NA	The directed movement of a monoatomic anion, into, out of or within a cell, or between cells, by means of some agent such as a transporter or pore. Monatomic anions (also called simple anions) are negatively charged ions consisting of exactly one atom.
GO:0007339	binding of sperm to zona pellucida	SantaPola - BW	4	NA	NA	NA	NA	9	5	NA	NA	The process in which the sperm binds to the zona pellucida glycoprotein layer of the egg. The process begins with the attachment of the sperm plasma membrane to the zona pellucida and includes attachment of the acrosome inner membrane to the zona pellucida after the acrosomal reaction takes place.
GO:0015671	oxygen transport	Adra - FW	4	8	4	NA	NA	NA	NA	NA	NA	The directed movement of oxygen (O2) into, out of or within a cell, or between cells, by means of some agent such as a transporter or pore.
GO:0035803	egg coat formation	SantaPola - BW	4	NA	NA	NA	NA	9	5	NA	NA	Construction of an egg coat, a specialized extracellular matrix that surrounds the ovum of animals. The egg coat provides structural support and can play an essential role in oogenesis, fertilization and early development.
GO:0006334	nucleosome assembly	Cabanes - BW	3	NA	NA	5	2	NA	NA	NA	NA	The aggregation, arrangement and bonding together of a nucleosome, the beadlike structural units of eukaryotic chromatin composed of histones and DNA.
GO:0006357	regulation of transcription by RNA polymerase II	SantaPola - BW	3	NA	NA	NA	NA	5	2	NA	NA	Any process that modulates the frequency, rate or extent of transcription mediated by RNA polymerase II.
GO:0006486	protein glycosylation	Cabanes - BW	3	NA	NA	9	6	NA	NA	NA	NA	A protein modification process that results in the addition of a carbohydrate or carbohydrate derivative unit to a protein amino acid, e.g. the addition of glycan chains to proteins.
GO:0006814	sodium ion transport	March - SW	3	NA	NA	NA	NA	NA	NA	5	2	The directed movement of sodium ions (Na+) into, out of or within a cell, or between cells, by means of some agent such as a transporter or pore.
GO:0006885	regulation of pH	March - SW	3	NA	NA	NA	NA	NA	NA	5	2	Any process involved in the maintenance of an internal equilibrium of hydrogen ions, thereby modulating the internal pH, within an organism or cell.
GO:0034220	ion transmembrane transport	March - SW	3	NA	NA	NA	NA	NA	NA	7	4	A process in which a monoatomic ion is transported across a membrane. Monatomic ions (also called simple ions) are ions consisting of exactly one atom.
GO:0035556	intracellular signal transduction	March - SW	3	NA	NA	NA	NA	NA	NA	6	3	The process in which a signal is passed on to downstream components within the cell, which become activated themselves to further propagate the signal and finally trigger a change in the function or state of the cell.
GO:0035556	intracellular signal transduction	Cabanes - BW	3	NA	NA	6	3	NA	NA	NA	NA	The process in which a signal is passed on to downstream components within the cell, which become activated themselves to further propagate the signal and finally trigger a change in the function or state of the cell.
GO:0006334	nucleosome assembly	March - SW	-3	NA	NA	NA	NA	NA	NA	2	5	The aggregation, arrangement and bonding together of a nucleosome, the beadlike structural units of eukaryotic chromatin composed of histones and DNA.
GO:0006357	regulation of transcription by RNA polymerase II	March - SW	-3	NA	NA	NA	NA	NA	NA	2	5	Any process that modulates the frequency, rate or extent of transcription mediated by RNA polymerase II.
GO:0006813	potassium ion transport	SantaPola - BW	-3	NA	NA	NA	NA	5	8	NA	NA	The directed movement of potassium ions (K+) into, out of or within a cell, or between cells, by means of some agent such as a transporter or pore.
GO:0006813	potassium ion transport	Adra - FW	-3	5	8	NA	NA	NA	NA	NA	NA	The directed movement of potassium ions (K+) into, out of or within a cell, or between cells, by means of some agent such as a transporter or pore.
GO:0006813	potassium ion transport	Cabanes - BW	-3	NA	NA	5	8	NA	NA	NA	NA	The directed movement of potassium ions (K+) into, out of or within a cell, or between cells, by means of some agent such as a transporter or pore.
GO:0006814	sodium ion transport	SantaPola - BW	-3	NA	NA	NA	NA	2	5	NA	NA	The directed movement of sodium ions (Na+) into, out of or within a cell, or between cells, by means of some agent such as a transporter or pore.
GO:0006821	chloride transport	March - SW	-3	NA	NA	NA	NA	NA	NA	2	5	The directed movement of chloride into, out of or within a cell, or between cells, by means of some agent such as a transporter or pore.
GO:0006821	chloride transport	SantaPola - BW	-3	NA	NA	NA	NA	2	5	NA	NA	The directed movement of chloride into, out of or within a cell, or between cells, by means of some agent such as a transporter or pore.
GO:0006885	regulation of pH	SantaPola - BW	-3	NA	NA	NA	NA	2	5	NA	NA	Any process involved in the maintenance of an internal equilibrium of hydrogen ions, thereby modulating the internal pH, within an organism or cell.
GO:0006955	immune response	Cabanes - BW	-3	NA	NA	6	9	NA	NA	NA	NA	Any immune system process that functions in the calibrated response of an organism to a potential internal or invasive threat.
GO:0034220	ion transmembrane transport	Cabanes - BW	-3	NA	NA	4	7	NA	NA	NA	NA	A process in which a monoatomic ion is transported across a membrane. Monatomic ions (also called simple ions) are ions consisting of exactly one atom.
GO:0006352	DNA-templated transcription, initiation	Adra - FW	-4	1	5	NA	NA	NA	NA	NA	NA	The initial step of transcription, consisting of the assembly of the RNA polymerase preinitiation complex (PIC) at a gene promoter, as well as the formation of the first few bonds of the RNA transcript. Transcription initiation includes abortive initiation events, which occur when the first few nucleotides are repeatedly synthesized and then released, and ends when promoter clearance takes place.
GO:0006811	ion transport	Cabanes - BW	-4	NA	NA	21	25	NA	NA	NA	NA	The directed movement of a monoatomic ion into, out of or within a cell, or between cells, by means of some agent such as a transporter or pore. Monatomic ions (also called simple ions) are ions consisting of exactly one atom.
GO:0006812	cation transport	Cabanes - BW	-4	NA	NA	4	8	NA	NA	NA	NA	The directed movement of a monoatomic cation, into, out of or within a cell, or between cells, by means of some agent such as a transporter or pore. Monatomic cations (also called simple cations) are positively charged ions consisting of exactly one atom.
GO:0006820	anion transport	SantaPola - BW	-4	NA	NA	NA	NA	1	5	NA	NA	The directed movement of a monoatomic anion, into, out of or within a cell, or between cells, by means of some agent such as a transporter or pore. Monatomic anions (also called simple anions) are negatively charged ions consisting of exactly one atom.
GO:0006869	lipid transport	SantaPola - BW	-4	NA	NA	NA	NA	2	6	NA	NA	The directed movement of lipids into, out of or within a cell, or between cells, by means of some agent such as a transporter or pore. Lipids are compounds soluble in an organic solvent but not, or sparingly, in an aqueous solvent.
GO:0007155	cell adhesion	SantaPola - BW	-4	NA	NA	NA	NA	4	8	NA	NA	The attachment of a cell, either to another cell or to an underlying substrate such as the extracellular matrix, via cell adhesion molecules.
GO:0007339	binding of sperm to zona pellucida	Cabanes - BW	-4	NA	NA	5	9	NA	NA	NA	NA	The process in which the sperm binds to the zona pellucida glycoprotein layer of the egg. The process begins with the attachment of the sperm plasma membrane to the zona pellucida and includes attachment of the acrosome inner membrane to the zona pellucida after the acrosomal reaction takes place.
GO:0015671	oxygen transport	SantaPola - BW	-4	NA	NA	NA	NA	4	8	NA	NA	The directed movement of oxygen (O2) into, out of or within a cell, or between cells, by means of some agent such as a transporter or pore.
GO:0035803	egg coat formation	Cabanes - BW	-4	NA	NA	5	9	NA	NA	NA	NA	Construction of an egg coat, a specialized extracellular matrix that surrounds the ovum of animals. The egg coat provides structural support and can play an essential role in oogenesis, fertilization and early development.
GO:0006357	regulation of transcription by RNA polymerase II	Cabanes - BW	-5	NA	NA	1	6	NA	NA	NA	NA	Any process that modulates the frequency, rate or extent of transcription mediated by RNA polymerase II.
GO:0006955	immune response	March - SW	-5	NA	NA	NA	NA	NA	NA	5	10	Any immune system process that functions in the calibrated response of an organism to a potential internal or invasive threat.
GO:0034220	ion transmembrane transport	SantaPola - BW	-5	NA	NA	NA	NA	3	8	NA	NA	A process in which a monoatomic ion is transported across a membrane. Monatomic ions (also called simple ions) are ions consisting of exactly one atom.
GO:0035556	intracellular signal transduction	SantaPola - BW	-5	NA	NA	NA	NA	2	7	NA	NA	The process in which a signal is passed on to downstream components within the cell, which become activated themselves to further propagate the signal and finally trigger a change in the function or state of the cell.
GO:0006313	transposition, DNA-mediated	SantaPola - BW	-6	NA	NA	NA	NA	16	22	NA	NA	A type of transposition in which a transposable element (transposon) is moved to another part of a genome, either by a cut-and-paste mechanism or a replicative mechanism.
GO:0006355	regulation of transcription, DNA-templated	Cabanes - BW	-6	NA	NA	9	15	NA	NA	NA	NA	Any process that modulates the frequency, rate or extent of cellular DNA-templated transcription.
GO:0006812	cation transport	SantaPola - BW	-6	NA	NA	NA	NA	3	9	NA	NA	The directed movement of a monoatomic cation, into, out of or within a cell, or between cells, by means of some agent such as a transporter or pore. Monatomic cations (also called simple cations) are positively charged ions consisting of exactly one atom.
GO:0007339	binding of sperm to zona pellucida	March - SW	-6	NA	NA	NA	NA	NA	NA	4	10	The process in which the sperm binds to the zona pellucida glycoprotein layer of the egg. The process begins with the attachment of the sperm plasma membrane to the zona pellucida and includes attachment of the acrosome inner membrane to the zona pellucida after the acrosomal reaction takes place.
GO:0035803	egg coat formation	March - SW	-6	NA	NA	NA	NA	NA	NA	4	10	Construction of an egg coat, a specialized extracellular matrix that surrounds the ovum of animals. The egg coat provides structural support and can play an essential role in oogenesis, fertilization and early development.
GO:0007186	G protein-coupled receptor signaling pathway	SantaPola - BW	-9	NA	NA	NA	NA	6	15	NA	NA	The series of molecular signals initiated by a ligand binding to its receptor, in which the activated receptor promotes the exchange of GDP for GTP on the alpha-subunit of an associated heterotrimeric G-protein complex. The GTP-bound activated alpha-G-protein then dissociates from the beta- and gamma-subunits to further transmit the signal within the cell. The pathway begins with receptor-ligand …
GO:0006811	ion transport	SantaPola - BW	-10	NA	NA	NA	NA	18	28	NA	NA	The directed movement of a monoatomic ion into, out of or within a cell, or between cells, by means of some agent such as a transporter or pore. Monatomic ions (also called simple ions) are ions consisting of exactly one atom.
GO:0015074	DNA integration	Cabanes - BW	-10	NA	NA	69	79	NA	NA	NA	NA	The process in which a DNA segment is incorporated into another, usually larger, DNA molecule such as a chromosome.
GO:0006508	proteolysis	Cabanes - BW	-13	NA	NA	28	41	NA	NA	NA	NA	The hydrolysis of proteins into smaller polypeptides and/or amino acids by cleavage of their peptide bonds.
GO:0055085	transmembrane transport	SantaPola - BW	-16	NA	NA	NA	NA	20	36	NA	NA	The process in which a solute is transported across a lipid bilayer, from one side of a membrane to the other.
GO:0055085	transmembrane transport	Cabanes - BW	-16	NA	NA	20	36	NA	NA	NA	NA	The process in which a solute is transported across a lipid bilayer, from one side of a membrane to the other.
GO:0015074	DNA integration	SantaPola - BW	-58	NA	NA	NA	NA	45	103	NA	NA	The process in which a DNA segment is incorporated into another, usually larger, DNA molecule such as a chromosome.

## Sheet: Celular Component Gill
id	name	Population	Difference	With_Adra - FW	Without_Adra - FW	With_Cabanes - BW	Without_Cabanes - BW	With_SantaPola - BW	Without_SantaPola - BW	With_March - SW	Without_March - SW	definition
GO:0016021	integral component of membrane	March - SW	51	NA	NA	NA	NA	NA	NA	90	39	NA
GO:0016020	membrane	March - SW	22	NA	NA	NA	NA	NA	NA	63	41	A lipid bilayer along with all the proteins and protein complexes embedded in it and attached to it.
GO:0016020	membrane	Adra - FW	18	61	43	NA	NA	NA	NA	NA	NA	A lipid bilayer along with all the proteins and protein complexes embedded in it and attached to it.
GO:0005923	bicellular tight junction	March - SW	13	NA	NA	NA	NA	NA	NA	15	2	An occluding cell-cell junction that is composed of a branching network of sealing strands that completely encircles the apical end of each cell in an epithelial sheet; the outer leaflets of the two interacting plasma membranes are seen to be tightly apposed where sealing strands are present. Each sealing strand is composed of a long row of transmembrane adhesion proteins embedded in each of the …
GO:0005886	plasma membrane	March - SW	9	NA	NA	NA	NA	NA	NA	12	3	The membrane surrounding a cell that separates the cell from its external environment. It consists of a phospholipid bilayer and associated proteins.
GO:0016459	myosin complex	Adra - FW	6	8	2	NA	NA	NA	NA	NA	NA	A protein complex, formed of one or more myosin heavy chains plus associated light chains and other proteins, that functions as a molecular motor; uses the energy of ATP hydrolysis to move actin filaments or to move vesicles or other cargo on fixed actin filaments; has magnesium-ATPase activity and binds actin. Myosin classes are distinguished based on sequence features of the motor, or head, dom…
GO:0005576	extracellular region	Adra - FW	5	18	13	NA	NA	NA	NA	NA	NA	The space external to the outermost structure of a cell. For cells without external protective or external encapsulating structures this refers to space outside of the plasma membrane. This term covers the host cell environment outside an intracellular parasite.
GO:0005576	extracellular region	March - SW	5	NA	NA	NA	NA	NA	NA	18	13	The space external to the outermost structure of a cell. For cells without external protective or external encapsulating structures this refers to space outside of the plasma membrane. This term covers the host cell environment outside an intracellular parasite.
GO:0005576	extracellular region	Cabanes - BW	5	NA	NA	18	13	NA	NA	NA	NA	The space external to the outermost structure of a cell. For cells without external protective or external encapsulating structures this refers to space outside of the plasma membrane. This term covers the host cell environment outside an intracellular parasite.
GO:0005833	hemoglobin complex	Adra - FW	5	8	3	NA	NA	NA	NA	NA	NA	An iron-containing, oxygen carrying complex. In vertebrates it is made up of two pairs of associated globin polypeptide chains, each chain carrying a noncovalently bound heme prosthetic group.
GO:0016021	integral component of membrane	Adra - FW	5	67	62	NA	NA	NA	NA	NA	NA	NA
GO:0000786	nucleosome	Cabanes - BW	4	NA	NA	14	10	NA	NA	NA	NA	A complex comprised of DNA wound around a multisubunit core and associated proteins, which forms the primary packing unit of DNA into higher order structures.
GO:0005887	integral component of plasma membrane	Cabanes - BW	4	NA	NA	9	5	NA	NA	NA	NA	NA
GO:0005833	hemoglobin complex	Cabanes - BW	-3	NA	NA	4	7	NA	NA	NA	NA	An iron-containing, oxygen carrying complex. In vertebrates it is made up of two pairs of associated globin polypeptide chains, each chain carrying a noncovalently bound heme prosthetic group.
GO:0005833	hemoglobin complex	SantaPola - BW	-3	NA	NA	NA	NA	4	7	NA	NA	An iron-containing, oxygen carrying complex. In vertebrates it is made up of two pairs of associated globin polypeptide chains, each chain carrying a noncovalently bound heme prosthetic group.
GO:0005886	plasma membrane	SantaPola - BW	-3	NA	NA	NA	NA	6	9	NA	NA	The membrane surrounding a cell that separates the cell from its external environment. It consists of a phospholipid bilayer and associated proteins.
GO:0005923	bicellular tight junction	Adra - FW	-3	7	10	NA	NA	NA	NA	NA	NA	An occluding cell-cell junction that is composed of a branching network of sealing strands that completely encircles the apical end of each cell in an epithelial sheet; the outer leaflets of the two interacting plasma membranes are seen to be tightly apposed where sealing strands are present. Each sealing strand is composed of a long row of transmembrane adhesion proteins embedded in each of the …
GO:0005923	bicellular tight junction	Cabanes - BW	-3	NA	NA	7	10	NA	NA	NA	NA	An occluding cell-cell junction that is composed of a branching network of sealing strands that completely encircles the apical end of each cell in an epithelial sheet; the outer leaflets of the two interacting plasma membranes are seen to be tightly apposed where sealing strands are present. Each sealing strand is composed of a long row of transmembrane adhesion proteins embedded in each of the …
GO:0000786	nucleosome	March - SW	-4	NA	NA	NA	NA	NA	NA	10	14	A complex comprised of DNA wound around a multisubunit core and associated proteins, which forms the primary packing unit of DNA into higher order structures.
GO:0005634	nucleus	Cabanes - BW	-4	NA	NA	5	9	NA	NA	NA	NA	A membrane-bounded organelle of eukaryotic cells in which chromosomes are housed and replicated. In most cells, the nucleus contains all of the cell's chromosomes except the organellar chromosomes, and is the site of RNA synthesis and processing. In some species, or in specialized cell types, RNA metabolism or DNA replication may be absent.
GO:0005887	integral component of plasma membrane	March - SW	-4	NA	NA	NA	NA	NA	NA	5	9	NA
GO:0005886	plasma membrane	Adra - FW	-5	5	10	NA	NA	NA	NA	NA	NA	The membrane surrounding a cell that separates the cell from its external environment. It consists of a phospholipid bilayer and associated proteins.
GO:0016459	myosin complex	SantaPola - BW	-6	NA	NA	NA	NA	2	8	NA	NA	A protein complex, formed of one or more myosin heavy chains plus associated light chains and other proteins, that functions as a molecular motor; uses the energy of ATP hydrolysis to move actin filaments or to move vesicles or other cargo on fixed actin filaments; has magnesium-ATPase activity and binds actin. Myosin classes are distinguished based on sequence features of the motor, or head, dom…
GO:0005923	bicellular tight junction	SantaPola - BW	-7	NA	NA	NA	NA	5	12	NA	NA	An occluding cell-cell junction that is composed of a branching network of sealing strands that completely encircles the apical end of each cell in an epithelial sheet; the outer leaflets of the two interacting plasma membranes are seen to be tightly apposed where sealing strands are present. Each sealing strand is composed of a long row of transmembrane adhesion proteins embedded in each of the …
GO:0016020	membrane	Cabanes - BW	-14	NA	NA	45	59	NA	NA	NA	NA	A lipid bilayer along with all the proteins and protein complexes embedded in it and attached to it.
GO:0005576	extracellular region	SantaPola - BW	-15	NA	NA	NA	NA	8	23	NA	NA	The space external to the outermost structure of a cell. For cells without external protective or external encapsulating structures this refers to space outside of the plasma membrane. This term covers the host cell environment outside an intracellular parasite.
GO:0016021	integral component of membrane	Cabanes - BW	-19	NA	NA	55	74	NA	NA	NA	NA	NA
GO:0016020	membrane	SantaPola - BW	-26	NA	NA	NA	NA	39	65	NA	NA	A lipid bilayer along with all the proteins and protein complexes embedded in it and attached to it.
GO:0016021	integral component of membrane	SantaPola - BW	-37	NA	NA	NA	NA	46	83	NA	NA	NA

## Sheet: Molecular Function GIT
id	name	Population	Difference	With_Adra - FW	Without_Adra - FW	With_Cabanes - BW	Without_Cabanes - BW	With_SantaPola - BW	Without_SantaPola - BW	With_March - SW	Without_March - SW	definition
GO:0005515	protein binding	March - SW	118	NA	NA	NA	NA	NA	NA	125	7	Binding to a protein.
GO:0003676	nucleic acid binding	March - SW	107	NA	NA	NA	NA	NA	NA	116	9	Binding to a nucleic acid.
GO:0005515	protein binding	Cabanes - BW	84	NA	NA	108	24	NA	NA	NA	NA	Binding to a protein.
GO:0003677	DNA binding	March - SW	49	NA	NA	NA	NA	NA	NA	52	3	Any molecular function by which a gene product interacts selectively and non-covalently with DNA (deoxyribonucleic acid).
GO:0003676	nucleic acid binding	Cabanes - BW	41	NA	NA	83	42	NA	NA	NA	NA	Binding to a nucleic acid.
GO:0003677	DNA binding	Cabanes - BW	41	NA	NA	48	7	NA	NA	NA	NA	Any molecular function by which a gene product interacts selectively and non-covalently with DNA (deoxyribonucleic acid).
GO:0005524	ATP binding	Cabanes - BW	36	NA	NA	46	10	NA	NA	NA	NA	Binding to ATP, adenosine 5'-triphosphate, a universally important coenzyme and enzyme regulator.
GO:0008270	zinc ion binding	March - SW	27	NA	NA	NA	NA	NA	NA	32	5	Binding to a zinc ion (Zn).
GO:0003824	catalytic activity	Cabanes - BW	25	NA	NA	28	3	NA	NA	NA	NA	Catalysis of a biochemical reaction at physiological temperatures. In biologically catalyzed reactions, the reactants are known as substrates, and the catalysts are naturally occurring macromolecular substances known as enzymes. Enzymes possess specific binding sites for substrates, and are usually composed wholly or largely of protein, but RNA that has catalytic activity (ribozyme) is often also…
GO:0008270	zinc ion binding	Cabanes - BW	25	NA	NA	31	6	NA	NA	NA	NA	Binding to a zinc ion (Zn).
GO:0022857	transmembrane transporter activity	March - SW	21	NA	NA	NA	NA	NA	NA	22	1	Enables the transfer of a substance, usually a specific substance or a group of related substances, from one side of a membrane to the other.
GO:0008168	methyltransferase activity	March - SW	19	NA	NA	NA	NA	NA	NA	22	3	Catalysis of the transfer of a methyl group to an acceptor molecule.
GO:0003824	catalytic activity	March - SW	17	NA	NA	NA	NA	NA	NA	24	7	Catalysis of a biochemical reaction at physiological temperatures. In biologically catalyzed reactions, the reactants are known as substrates, and the catalysts are naturally occurring macromolecular substances known as enzymes. Enzymes possess specific binding sites for substrates, and are usually composed wholly or largely of protein, but RNA that has catalytic activity (ribozyme) is often also…
GO:0022857	transmembrane transporter activity	Cabanes - BW	17	NA	NA	20	3	NA	NA	NA	NA	Enables the transfer of a substance, usually a specific substance or a group of related substances, from one side of a membrane to the other.
GO:0005509	calcium ion binding	March - SW	15	NA	NA	NA	NA	NA	NA	16	1	Binding to a calcium ion (Ca2+).
GO:0016706	2-oxoglutarate-dependent dioxygenase activity	March - SW	15	NA	NA	NA	NA	NA	NA	18	3	Catalysis of the reaction: A + 2-oxoglutarate + O2 = B + succinate + CO2. This is an oxidation-reduction (redox) reaction in which hydrogen or electrons are transferred from 2-oxoglutarate and one other donor, and one atom of oxygen is incorporated into each donor.
GO:0003700	DNA-binding transcription factor activity	March - SW	14	NA	NA	NA	NA	NA	NA	15	1	A transcription regulator activity that modulates transcription of gene sets via selective and non-covalent binding to a specific double-stranded genomic DNA sequence (sometimes referred to as a motif) within a cis-regulatory region. Regulatory regions include promoters (proximal and distal) and enhancers. Genes are transcriptional units, and include bacterial operons.
GO:0003700	DNA-binding transcription factor activity	Cabanes - BW	14	NA	NA	15	1	NA	NA	NA	NA	A transcription regulator activity that modulates transcription of gene sets via selective and non-covalent binding to a specific double-stranded genomic DNA sequence (sometimes referred to as a motif) within a cis-regulatory region. Regulatory regions include promoters (proximal and distal) and enhancers. Genes are transcriptional units, and include bacterial operons.
GO:0008168	methyltransferase activity	Cabanes - BW	13	NA	NA	19	6	NA	NA	NA	NA	Catalysis of the transfer of a methyl group to an acceptor molecule.
GO:0046872	metal ion binding	March - SW	13	NA	NA	NA	NA	NA	NA	14	1	Binding to a metal ion.
GO:0003723	RNA binding	Cabanes - BW	12	NA	NA	18	6	NA	NA	NA	NA	Binding to an RNA molecule or a portion thereof.
GO:0004672	protein kinase activity	Cabanes - BW	12	NA	NA	14	2	NA	NA	NA	NA	Catalysis of the phosphorylation of an amino acid residue in a protein, usually according to the reaction: a protein + ATP = a phosphoprotein + ADP.
GO:0004930	G protein-coupled receptor activity	Cabanes - BW	12	NA	NA	16	4	NA	NA	NA	NA	Combining with an extracellular signal and transmitting the signal across the membrane by activating an associated G-protein; promotes the exchange of GDP for GTP on the alpha subunit of a heterotrimeric G-protein complex.
GO:0005509	calcium ion binding	Cabanes - BW	11	NA	NA	14	3	NA	NA	NA	NA	Binding to a calcium ion (Ca2+).
GO:0003924	GTPase activity	Cabanes - BW	10	NA	NA	11	1	NA	NA	NA	NA	Catalysis of the reaction: GTP + H2O = GDP + H+ + phosphate.
GO:0004252	serine-type endopeptidase activity	Cabanes - BW	9	NA	NA	10	1	NA	NA	NA	NA	Catalysis of the hydrolysis of internal, alpha-peptide bonds in a polypeptide chain by a catalytic mechanism that involves a catalytic triad consisting of a serine nucleophile that is activated by a proton relay involving an acidic residue (e.g. aspartate or glutamate) and a basic residue (usually histidine).
GO:0004252	serine-type endopeptidase activity	March - SW	9	NA	NA	NA	NA	NA	NA	10	1	Catalysis of the hydrolysis of internal, alpha-peptide bonds in a polypeptide chain by a catalytic mechanism that involves a catalytic triad consisting of a serine nucleophile that is activated by a proton relay involving an acidic residue (e.g. aspartate or glutamate) and a basic residue (usually histidine).
GO:0005506	iron ion binding	Cabanes - BW	9	NA	NA	10	1	NA	NA	NA	NA	Binding to an iron (Fe) ion.
GO:0016706	2-oxoglutarate-dependent dioxygenase activity	Cabanes - BW	9	NA	NA	15	6	NA	NA	NA	NA	Catalysis of the reaction: A + 2-oxoglutarate + O2 = B + succinate + CO2. This is an oxidation-reduction (redox) reaction in which hydrogen or electrons are transferred from 2-oxoglutarate and one other donor, and one atom of oxygen is incorporated into each donor.
GO:0016787	hydrolase activity	Cabanes - BW	9	NA	NA	10	1	NA	NA	NA	NA	Catalysis of the hydrolysis of various bonds, e.g. C-O, C-N, C-C, phosphoric anhydride bonds, etc.
GO:0020037	heme binding	Cabanes - BW	9	NA	NA	10	1	NA	NA	NA	NA	Binding to a heme, a compound composed of iron complexed in a porphyrin (tetrapyrrole) ring.
GO:0046872	metal ion binding	Cabanes - BW	9	NA	NA	12	3	NA	NA	NA	NA	Binding to a metal ion.
GO:0000981	DNA-binding transcription factor activity, RNA polymerase II-specific	March - SW	8	NA	NA	NA	NA	NA	NA	9	1	A DNA-binding transcription factor activity that modulates the transcription of specific gene sets transcribed by RNA polymerase II.
GO:0000981	DNA-binding transcription factor activity, RNA polymerase II-specific	Cabanes - BW	8	NA	NA	9	1	NA	NA	NA	NA	A DNA-binding transcription factor activity that modulates the transcription of specific gene sets transcribed by RNA polymerase II.
GO:0004888	transmembrane signaling receptor activity	Cabanes - BW	8	NA	NA	9	1	NA	NA	NA	NA	Combining with an extracellular or intracellular signal and transmitting the signal from one side of the membrane to the other to initiate a change in cell activity or state as part of signal transduction.
GO:0005216	ion channel activity	March - SW	8	NA	NA	NA	NA	NA	NA	9	1	Enables the facilitated diffusion of a monoatomic ion (by an energy-independent process) by passage through a transmembrane aqueous pore or channel without evidence for a carrier-mediated mechanism. May be either selective (it enables passage of a specific ion only) or non-selective (it enables passage of two or more ions of same charge but different size).
GO:0016887	ATPase	Cabanes - BW	8	NA	NA	10	2	NA	NA	NA	NA	Catalysis of the reaction: ATP + H2O = ADP + H+ phosphate. ATP hydrolysis is used in some reactions as an energy source, for example to catalyze a reaction or drive transport against a concentration gradient.
GO:0004497	monooxygenase activity	Cabanes - BW	7	NA	NA	8	1	NA	NA	NA	NA	Catalysis of the incorporation of one atom from molecular oxygen into a compound and the reduction of the other atom of oxygen to water.
GO:0016787	hydrolase activity	March - SW	7	NA	NA	NA	NA	NA	NA	9	2	Catalysis of the hydrolysis of various bonds, e.g. C-O, C-N, C-C, phosphoric anhydride bonds, etc.
GO:0030246	carbohydrate binding	Cabanes - BW	7	NA	NA	8	1	NA	NA	NA	NA	Binding to a carbohydrate, which includes monosaccharides, oligosaccharides and polysaccharides as well as substances derived from monosaccharides by reduction of the carbonyl group (alditols), by oxidation of one or more hydroxy groups to afford the corresponding aldehydes, ketones, or carboxylic acids, or by replacement of one or more hydroxy group(s) by a hydrogen atom. Cyclitols are generally…
GO:0005085	guanyl-nucleotide exchange factor activity	Cabanes - BW	6	NA	NA	7	1	NA	NA	NA	NA	Stimulates the exchange of GDP to GTP on a signaling GTPase, changing its conformation to its active form. Guanine nucleotide exchange factors (GEFs) act by stimulating the release of guanosine diphosphate (GDP) to allow binding of guanosine triphosphate (GTP), which is more abundant in the cell under normal cellular physiological conditions.
GO:0005085	guanyl-nucleotide exchange factor activity	March - SW	6	NA	NA	NA	NA	NA	NA	7	1	Stimulates the exchange of GDP to GTP on a signaling GTPase, changing its conformation to its active form. Guanine nucleotide exchange factors (GEFs) act by stimulating the release of guanosine diphosphate (GDP) to allow binding of guanosine triphosphate (GTP), which is more abundant in the cell under normal cellular physiological conditions.
GO:0005525	GTP binding	Cabanes - BW	6	NA	NA	18	12	NA	NA	NA	NA	Binding to GTP, guanosine triphosphate.
GO:0016491	oxidoreductase activity	Cabanes - BW	6	NA	NA	8	2	NA	NA	NA	NA	Catalysis of an oxidation-reduction (redox) reaction, a reversible chemical reaction in which the oxidation state of an atom or atoms within a molecule is altered. One substrate acts as a hydrogen or electron donor and becomes oxidized, while the other acts as hydrogen or electron acceptor and becomes reduced.
GO:0016705	oxidoreductase activity, acting on paired donors, with incorporation or reduction of molecular oxygen	Cabanes - BW	6	NA	NA	7	1	NA	NA	NA	NA	Catalysis of an oxidation-reduction (redox) reaction in which hydrogen or electrons are transferred from each of two donors, and molecular oxygen is reduced or incorporated into a donor.
GO:0004497	monooxygenase activity	March - SW	5	NA	NA	NA	NA	NA	NA	7	2	Catalysis of the incorporation of one atom from molecular oxygen into a compound and the reduction of the other atom of oxygen to water.
GO:0005506	iron ion binding	March - SW	5	NA	NA	NA	NA	NA	NA	8	3	Binding to an iron (Fe) ion.
GO:0008017	microtubule binding	Cabanes - BW	5	NA	NA	6	1	NA	NA	NA	NA	Binding to a microtubule, a filament composed of tubulin monomers.
GO:0020037	heme binding	March - SW	5	NA	NA	NA	NA	NA	NA	8	3	Binding to a heme, a compound composed of iron complexed in a porphyrin (tetrapyrrole) ring.
GO:0046983	protein dimerization activity	Cabanes - BW	5	NA	NA	7	2	NA	NA	NA	NA	The formation of a protein dimer, a macromolecular structure consists of two noncovalently associated identical or nonidentical subunits.
GO:0005216	ion channel activity	Cabanes - BW	4	NA	NA	7	3	NA	NA	NA	NA	Enables the facilitated diffusion of a monoatomic ion (by an energy-independent process) by passage through a transmembrane aqueous pore or channel without evidence for a carrier-mediated mechanism. May be either selective (it enables passage of a specific ion only) or non-selective (it enables passage of two or more ions of same charge but different size).
GO:0008234	cysteine-type peptidase activity	Cabanes - BW	4	NA	NA	5	1	NA	NA	NA	NA	Catalysis of the hydrolysis of peptide bonds in a polypeptide chain by a mechanism in which the sulfhydryl group of a cysteine residue at the active center acts as a nucleophile.
GO:0016705	oxidoreductase activity, acting on paired donors, with incorporation or reduction of molecular oxygen	March - SW	4	NA	NA	NA	NA	NA	NA	6	2	Catalysis of an oxidation-reduction (redox) reaction in which hydrogen or electrons are transferred from each of two donors, and molecular oxygen is reduced or incorporated into a donor.
GO:0046982	protein heterodimerization activity	Cabanes - BW	4	NA	NA	5	1	NA	NA	NA	NA	Binding to a nonidentical protein to form a heterodimer.
GO:0004190	aspartic-type endopeptidase activity	March - SW	3	NA	NA	NA	NA	NA	NA	6	3	Catalysis of the hydrolysis of internal, alpha-peptide bonds in a polypeptide chain by a mechanism in which a water molecule bound by the side chains of aspartic residues at the active center acts as a nucleophile.
GO:0004190	aspartic-type endopeptidase activity	Cabanes - BW	3	NA	NA	6	3	NA	NA	NA	NA	Catalysis of the hydrolysis of internal, alpha-peptide bonds in a polypeptide chain by a mechanism in which a water molecule bound by the side chains of aspartic residues at the active center acts as a nucleophile.
GO:0004190	aspartic-type endopeptidase activity	SantaPola - BW	-3	NA	NA	NA	NA	3	6	NA	NA	Catalysis of the hydrolysis of internal, alpha-peptide bonds in a polypeptide chain by a mechanism in which a water molecule bound by the side chains of aspartic residues at the active center acts as a nucleophile.
GO:0004190	aspartic-type endopeptidase activity	Adra - FW	-3	3	6	NA	NA	NA	NA	NA	NA	Catalysis of the hydrolysis of internal, alpha-peptide bonds in a polypeptide chain by a mechanism in which a water molecule bound by the side chains of aspartic residues at the active center acts as a nucleophile.
GO:0004497	monooxygenase activity	Adra - FW	-3	3	6	NA	NA	NA	NA	NA	NA	Catalysis of the incorporation of one atom from molecular oxygen into a compound and the reduction of the other atom of oxygen to water.
GO:0005506	iron ion binding	Adra - FW	-3	4	7	NA	NA	NA	NA	NA	NA	Binding to an iron (Fe) ion.
GO:0004842	ubiquitin-protein transferase activity	SantaPola - BW	-4	NA	NA	NA	NA	3	7	NA	NA	Catalysis of the transfer of ubiquitin from one protein to another via the reaction X-Ub + Y = Y-Ub + X, where both X-Ub and Y-Ub are covalent linkages.
GO:0005085	guanyl-nucleotide exchange factor activity	SantaPola - BW	-4	NA	NA	NA	NA	2	6	NA	NA	Stimulates the exchange of GDP to GTP on a signaling GTPase, changing its conformation to its active form. Guanine nucleotide exchange factors (GEFs) act by stimulating the release of guanosine diphosphate (GDP) to allow binding of guanosine triphosphate (GTP), which is more abundant in the cell under normal cellular physiological conditions.
GO:0005216	ion channel activity	SantaPola - BW	-4	NA	NA	NA	NA	3	7	NA	NA	Enables the facilitated diffusion of a monoatomic ion (by an energy-independent process) by passage through a transmembrane aqueous pore or channel without evidence for a carrier-mediated mechanism. May be either selective (it enables passage of a specific ion only) or non-selective (it enables passage of two or more ions of same charge but different size).
GO:0008234	cysteine-type peptidase activity	SantaPola - BW	-4	NA	NA	NA	NA	1	5	NA	NA	Catalysis of the hydrolysis of peptide bonds in a polypeptide chain by a mechanism in which the sulfhydryl group of a cysteine residue at the active center acts as a nucleophile.
GO:0046982	protein heterodimerization activity	SantaPola - BW	-4	NA	NA	NA	NA	1	5	NA	NA	Binding to a nonidentical protein to form a heterodimer.
GO:0008017	microtubule binding	SantaPola - BW	-5	NA	NA	NA	NA	1	6	NA	NA	Binding to a microtubule, a filament composed of tubulin monomers.
GO:0020037	heme binding	Adra - FW	-5	3	8	NA	NA	NA	NA	NA	NA	Binding to a heme, a compound composed of iron complexed in a porphyrin (tetrapyrrole) ring.
GO:0046983	protein dimerization activity	SantaPola - BW	-5	NA	NA	NA	NA	2	7	NA	NA	The formation of a protein dimer, a macromolecular structure consists of two noncovalently associated identical or nonidentical subunits.
GO:0016491	oxidoreductase activity	Adra - FW	-6	2	8	NA	NA	NA	NA	NA	NA	Catalysis of an oxidation-reduction (redox) reaction, a reversible chemical reaction in which the oxidation state of an atom or atoms within a molecule is altered. One substrate acts as a hydrogen or electron donor and becomes oxidized, while the other acts as hydrogen or electron acceptor and becomes reduced.
GO:0016787	hydrolase activity	Adra - FW	-7	2	9	NA	NA	NA	NA	NA	NA	Catalysis of the hydrolysis of various bonds, e.g. C-O, C-N, C-C, phosphoric anhydride bonds, etc.
GO:0030246	carbohydrate binding	SantaPola - BW	-7	NA	NA	NA	NA	1	8	NA	NA	Binding to a carbohydrate, which includes monosaccharides, oligosaccharides and polysaccharides as well as substances derived from monosaccharides by reduction of the carbonyl group (alditols), by oxidation of one or more hydroxy groups to afford the corresponding aldehydes, ketones, or carboxylic acids, or by replacement of one or more hydroxy group(s) by a hydrogen atom. Cyclitols are generally…
GO:0000981	DNA-binding transcription factor activity, RNA polymerase II-specific	Adra - FW	-8	1	9	NA	NA	NA	NA	NA	NA	A DNA-binding transcription factor activity that modulates the transcription of specific gene sets transcribed by RNA polymerase II.
GO:0000981	DNA-binding transcription factor activity, RNA polymerase II-specific	SantaPola - BW	-8	NA	NA	NA	NA	1	9	NA	NA	A DNA-binding transcription factor activity that modulates the transcription of specific gene sets transcribed by RNA polymerase II.
GO:0004842	ubiquitin-protein transferase activity	Adra - FW	-8	1	9	NA	NA	NA	NA	NA	NA	Catalysis of the transfer of ubiquitin from one protein to another via the reaction X-Ub + Y = Y-Ub + X, where both X-Ub and Y-Ub are covalent linkages.
GO:0004888	transmembrane signaling receptor activity	SantaPola - BW	-8	NA	NA	NA	NA	1	9	NA	NA	Combining with an extracellular or intracellular signal and transmitting the signal from one side of the membrane to the other to initiate a change in cell activity or state as part of signal transduction.
GO:0005216	ion channel activity	Adra - FW	-8	1	9	NA	NA	NA	NA	NA	NA	Enables the facilitated diffusion of a monoatomic ion (by an energy-independent process) by passage through a transmembrane aqueous pore or channel without evidence for a carrier-mediated mechanism. May be either selective (it enables passage of a specific ion only) or non-selective (it enables passage of two or more ions of same charge but different size).
GO:0004252	serine-type endopeptidase activity	SantaPola - BW	-9	NA	NA	NA	NA	1	10	NA	NA	Catalysis of the hydrolysis of internal, alpha-peptide bonds in a polypeptide chain by a catalytic mechanism that involves a catalytic triad consisting of a serine nucleophile that is activated by a proton relay involving an acidic residue (e.g. aspartate or glutamate) and a basic residue (usually histidine).
GO:0004252	serine-type endopeptidase activity	Adra - FW	-9	1	10	NA	NA	NA	NA	NA	NA	Catalysis of the hydrolysis of internal, alpha-peptide bonds in a polypeptide chain by a catalytic mechanism that involves a catalytic triad consisting of a serine nucleophile that is activated by a proton relay involving an acidic residue (e.g. aspartate or glutamate) and a basic residue (usually histidine).
GO:0016787	hydrolase activity	SantaPola - BW	-9	NA	NA	NA	NA	1	10	NA	NA	Catalysis of the hydrolysis of various bonds, e.g. C-O, C-N, C-C, phosphoric anhydride bonds, etc.
GO:0020037	heme binding	SantaPola - BW	-9	NA	NA	NA	NA	1	10	NA	NA	Binding to a heme, a compound composed of iron complexed in a porphyrin (tetrapyrrole) ring.
GO:0046872	metal ion binding	SantaPola - BW	-9	NA	NA	NA	NA	3	12	NA	NA	Binding to a metal ion.
GO:0003924	GTPase activity	SantaPola - BW	-10	NA	NA	NA	NA	1	11	NA	NA	Catalysis of the reaction: GTP + H2O = GDP + H+ + phosphate.
GO:0016887	ATPase	Adra - FW	-10	1	11	NA	NA	NA	NA	NA	NA	Catalysis of the reaction: ATP + H2O = ADP + H+ phosphate. ATP hydrolysis is used in some reactions as an energy source, for example to catalyze a reaction or drive transport against a concentration gradient.
GO:0016887	ATPase	SantaPola - BW	-10	NA	NA	NA	NA	1	11	NA	NA	Catalysis of the reaction: ATP + H2O = ADP + H+ phosphate. ATP hydrolysis is used in some reactions as an energy source, for example to catalyze a reaction or drive transport against a concentration gradient.
GO:0005509	calcium ion binding	SantaPola - BW	-11	NA	NA	NA	NA	3	14	NA	NA	Binding to a calcium ion (Ca2+).
GO:0016706	2-oxoglutarate-dependent dioxygenase activity	Adra - FW	-11	5	16	NA	NA	NA	NA	NA	NA	Catalysis of the reaction: A + 2-oxoglutarate + O2 = B + succinate + CO2. This is an oxidation-reduction (redox) reaction in which hydrogen or electrons are transferred from 2-oxoglutarate and one other donor, and one atom of oxygen is incorporated into each donor.
GO:0003723	RNA binding	SantaPola - BW	-12	NA	NA	NA	NA	6	18	NA	NA	Binding to an RNA molecule or a portion thereof.
GO:0004930	G protein-coupled receptor activity	SantaPola - BW	-12	NA	NA	NA	NA	4	16	NA	NA	Combining with an extracellular signal and transmitting the signal across the membrane by activating an associated G-protein; promotes the exchange of GDP for GTP on the alpha subunit of a heterotrimeric G-protein complex.
GO:0003824	catalytic activity	Adra - FW	-13	9	22	NA	NA	NA	NA	NA	NA	Catalysis of a biochemical reaction at physiological temperatures. In biologically catalyzed reactions, the reactants are known as substrates, and the catalysts are naturally occurring macromolecular substances known as enzymes. Enzymes possess specific binding sites for substrates, and are usually composed wholly or largely of protein, but RNA that has catalytic activity (ribozyme) is often also…
GO:0016706	2-oxoglutarate-dependent dioxygenase activity	SantaPola - BW	-13	NA	NA	NA	NA	4	17	NA	NA	Catalysis of the reaction: A + 2-oxoglutarate + O2 = B + succinate + CO2. This is an oxidation-reduction (redox) reaction in which hydrogen or electrons are transferred from 2-oxoglutarate and one other donor, and one atom of oxygen is incorporated into each donor.
GO:0046872	metal ion binding	Adra - FW	-13	1	14	NA	NA	NA	NA	NA	NA	Binding to a metal ion.
GO:0003700	DNA-binding transcription factor activity	SantaPola - BW	-14	NA	NA	NA	NA	1	15	NA	NA	A transcription regulator activity that modulates transcription of gene sets via selective and non-covalent binding to a specific double-stranded genomic DNA sequence (sometimes referred to as a motif) within a cis-regulatory region. Regulatory regions include promoters (proximal and distal) and enhancers. Genes are transcriptional units, and include bacterial operons.
GO:0003700	DNA-binding transcription factor activity	Adra - FW	-14	1	15	NA	NA	NA	NA	NA	NA	A transcription regulator activity that modulates transcription of gene sets via selective and non-covalent binding to a specific double-stranded genomic DNA sequence (sometimes referred to as a motif) within a cis-regulatory region. Regulatory regions include promoters (proximal and distal) and enhancers. Genes are transcriptional units, and include bacterial operons.
GO:0004672	protein kinase activity	SantaPola - BW	-14	NA	NA	NA	NA	1	15	NA	NA	Catalysis of the phosphorylation of an amino acid residue in a protein, usually according to the reaction: a protein + ATP = a phosphoprotein + ADP.
GO:0004672	protein kinase activity	Adra - FW	-14	1	15	NA	NA	NA	NA	NA	NA	Catalysis of the phosphorylation of an amino acid residue in a protein, usually according to the reaction: a protein + ATP = a phosphoprotein + ADP.
GO:0005525	GTP binding	SantaPola - BW	-14	NA	NA	NA	NA	8	22	NA	NA	Binding to GTP, guanosine triphosphate.
GO:0005509	calcium ion binding	Adra - FW	-15	1	16	NA	NA	NA	NA	NA	NA	Binding to a calcium ion (Ca2+).
GO:0008168	methyltransferase activity	Adra - FW	-15	5	20	NA	NA	NA	NA	NA	NA	Catalysis of the transfer of a methyl group to an acceptor molecule.
GO:0008168	methyltransferase activity	SantaPola - BW	-17	NA	NA	NA	NA	4	21	NA	NA	Catalysis of the transfer of a methyl group to an acceptor molecule.
GO:0022857	transmembrane transporter activity	SantaPola - BW	-17	NA	NA	NA	NA	3	20	NA	NA	Enables the transfer of a substance, usually a specific substance or a group of related substances, from one side of a membrane to the other.
GO:0022857	transmembrane transporter activity	Adra - FW	-21	1	22	NA	NA	NA	NA	NA	NA	Enables the transfer of a substance, usually a specific substance or a group of related substances, from one side of a membrane to the other.
GO:0005525	GTP binding	Adra - FW	-22	4	26	NA	NA	NA	NA	NA	NA	Binding to GTP, guanosine triphosphate.
GO:0008270	zinc ion binding	Adra - FW	-25	6	31	NA	NA	NA	NA	NA	NA	Binding to a zinc ion (Zn).
GO:0008270	zinc ion binding	SantaPola - BW	-27	NA	NA	NA	NA	5	32	NA	NA	Binding to a zinc ion (Zn).
GO:0003824	catalytic activity	SantaPola - BW	-29	NA	NA	NA	NA	1	30	NA	NA	Catalysis of a biochemical reaction at physiological temperatures. In biologically catalyzed reactions, the reactants are known as substrates, and the catalysts are naturally occurring macromolecular substances known as enzymes. Enzymes possess specific binding sites for substrates, and are usually composed wholly or largely of protein, but RNA that has catalytic activity (ribozyme) is often also…
GO:0005524	ATP binding	SantaPola - BW	-42	NA	NA	NA	NA	7	49	NA	NA	Binding to ATP, adenosine 5'-triphosphate, a universally important coenzyme and enzyme regulator.
GO:0003677	DNA binding	Adra - FW	-43	6	49	NA	NA	NA	NA	NA	NA	Any molecular function by which a gene product interacts selectively and non-covalently with DNA (deoxyribonucleic acid).
GO:0003677	DNA binding	SantaPola - BW	-47	NA	NA	NA	NA	4	51	NA	NA	Any molecular function by which a gene product interacts selectively and non-covalently with DNA (deoxyribonucleic acid).
GO:0005524	ATP binding	Adra - FW	-50	3	53	NA	NA	NA	NA	NA	NA	Binding to ATP, adenosine 5'-triphosphate, a universally important coenzyme and enzyme regulator.
GO:0003676	nucleic acid binding	SantaPola - BW	-73	NA	NA	NA	NA	26	99	NA	NA	Binding to a nucleic acid.
GO:0003676	nucleic acid binding	Adra - FW	-75	25	100	NA	NA	NA	NA	NA	NA	Binding to a nucleic acid.
GO:0005515	protein binding	SantaPola - BW	-96	NA	NA	NA	NA	18	114	NA	NA	Binding to a protein.
GO:0005515	protein binding	Adra - FW	-106	13	119	NA	NA	NA	NA	NA	NA	Binding to a protein.

## Sheet: Biological Process GIT
id	name	Population	Difference	With_Adra - FW	Without_Adra - FW	With_Cabanes - BW	Without_Cabanes - BW	With_SantaPola - BW	Without_SantaPola - BW	With_March - SW	Without_March - SW	definition
GO:0015074	DNA integration	March - SW	52	NA	NA	NA	NA	NA	NA	56	4	The process in which a DNA segment is incorporated into another, usually larger, DNA molecule such as a chromosome.
GO:0055085	transmembrane transport	March - SW	42	NA	NA	NA	NA	NA	NA	44	2	The process in which a solute is transported across a lipid bilayer, from one side of a membrane to the other.
GO:0055085	transmembrane transport	Cabanes - BW	36	NA	NA	41	5	NA	NA	NA	NA	The process in which a solute is transported across a lipid bilayer, from one side of a membrane to the other.
GO:0006508	proteolysis	March - SW	27	NA	NA	NA	NA	NA	NA	32	5	The hydrolysis of proteins into smaller polypeptides and/or amino acids by cleavage of their peptide bonds.
GO:0015074	DNA integration	Cabanes - BW	26	NA	NA	43	17	NA	NA	NA	NA	The process in which a DNA segment is incorporated into another, usually larger, DNA molecule such as a chromosome.
GO:0006508	proteolysis	Cabanes - BW	25	NA	NA	31	6	NA	NA	NA	NA	The hydrolysis of proteins into smaller polypeptides and/or amino acids by cleavage of their peptide bonds.
GO:0006355	regulation of transcription, DNA-templated	March - SW	23	NA	NA	NA	NA	NA	NA	25	2	Any process that modulates the frequency, rate or extent of cellular DNA-templated transcription.
GO:0006355	regulation of transcription, DNA-templated	Cabanes - BW	23	NA	NA	25	2	NA	NA	NA	NA	Any process that modulates the frequency, rate or extent of cellular DNA-templated transcription.
GO:0006313	transposition, DNA-mediated	Cabanes - BW	13	NA	NA	17	4	NA	NA	NA	NA	A type of transposition in which a transposable element (transposon) is moved to another part of a genome, either by a cut-and-paste mechanism or a replicative mechanism.
GO:0006468	protein phosphorylation	Cabanes - BW	13	NA	NA	15	2	NA	NA	NA	NA	The process of introducing a phosphate group on to a protein.
GO:0007186	G protein-coupled receptor signaling pathway	Cabanes - BW	12	NA	NA	16	4	NA	NA	NA	NA	The series of molecular signals initiated by a ligand binding to its receptor, in which the activated receptor promotes the exchange of GDP for GTP on the alpha-subunit of an associated heterotrimeric G-protein complex. The GTP-bound activated alpha-G-protein then dissociates from the beta- and gamma-subunits to further transmit the signal within the cell. The pathway begins with receptor-ligand …
GO:0006811	ion transport	March - SW	11	NA	NA	NA	NA	NA	NA	12	1	The directed movement of a monoatomic ion into, out of or within a cell, or between cells, by means of some agent such as a transporter or pore. Monatomic ions (also called simple ions) are ions consisting of exactly one atom.
GO:0005975	carbohydrate metabolic process	Cabanes - BW	7	NA	NA	9	2	NA	NA	NA	NA	The chemical reactions and pathways involving carbohydrates, any of a group of organic compounds based of the general formula Cx(H2O)y.
GO:0006811	ion transport	Cabanes - BW	7	NA	NA	10	3	NA	NA	NA	NA	The directed movement of a monoatomic ion into, out of or within a cell, or between cells, by means of some agent such as a transporter or pore. Monatomic ions (also called simple ions) are ions consisting of exactly one atom.
GO:0006955	immune response	Cabanes - BW	7	NA	NA	8	1	NA	NA	NA	NA	Any immune system process that functions in the calibrated response of an organism to a potential internal or invasive threat.
GO:0007165	signal transduction	Cabanes - BW	7	NA	NA	9	2	NA	NA	NA	NA	The cellular process in which a signal is conveyed to trigger a change in the activity or state of a cell. Signal transduction begins with reception of a signal (e.g. a ligand binding to a receptor or receptor activation by a stimulus such as light), or for signal transduction in the absence of ligand, signal-withdrawal or the activity of a constitutively active receptor. Signal transduction ends…
GO:0007155	cell adhesion	Cabanes - BW	6	NA	NA	8	2	NA	NA	NA	NA	The attachment of a cell, either to another cell or to an underlying substrate such as the extracellular matrix, via cell adhesion molecules.
GO:0005975	carbohydrate metabolic process	March - SW	5	NA	NA	NA	NA	NA	NA	8	3	The chemical reactions and pathways involving carbohydrates, any of a group of organic compounds based of the general formula Cx(H2O)y.
GO:0006955	immune response	March - SW	5	NA	NA	NA	NA	NA	NA	7	2	Any immune system process that functions in the calibrated response of an organism to a potential internal or invasive threat.
GO:0007166	cell surface receptor signaling pathway	Cabanes - BW	5	NA	NA	6	1	NA	NA	NA	NA	The series of molecular signals initiated by an extracellular ligand binding to a receptor located on the cell surface. The pathway ends with regulation of a downstream cellular process, e.g. transcription.
GO:0006281	DNA repair	Cabanes - BW	4	NA	NA	5	1	NA	NA	NA	NA	The process of restoring DNA after damage. Genomes are subject to damage by chemical and physical agents in the environment (e.g. UV and ionizing radiations, chemical mutagens, fungal and bacterial toxins, etc.) and by free radicals or alkylating agents endogenously generated in metabolism. DNA is also damaged because of errors during its replication. A variety of different DNA repair pathways ha…
GO:0007154	cell communication	Cabanes - BW	4	NA	NA	5	1	NA	NA	NA	NA	Any process that mediates interactions between a cell and its surroundings. Encompasses interactions such as signaling or attachment between one cell and another cell, between a cell and an extracellular matrix, or between a cell and any other aspect of its environment.
GO:0006281	DNA repair	SantaPola - BW	-4	NA	NA	NA	NA	1	5	NA	NA	The process of restoring DNA after damage. Genomes are subject to damage by chemical and physical agents in the environment (e.g. UV and ionizing radiations, chemical mutagens, fungal and bacterial toxins, etc.) and by free radicals or alkylating agents endogenously generated in metabolism. DNA is also damaged because of errors during its replication. A variety of different DNA repair pathways ha…
GO:0006629	lipid metabolic process	Cabanes - BW	-4	NA	NA	2	6	NA	NA	NA	NA	The chemical reactions and pathways involving lipids, compounds soluble in an organic solvent but not, or sparingly, in an aqueous solvent. Includes fatty acids; neutral fats, other fatty-acid esters, and soaps; long-chain (fatty) alcohols and waxes; sphingoids and other long-chain bases; glycolipids, phospholipids and sphingolipids; and carotenes, polyprenols, sterols, terpenes and other isopren…
GO:0006629	lipid metabolic process	SantaPola - BW	-4	NA	NA	NA	NA	2	6	NA	NA	The chemical reactions and pathways involving lipids, compounds soluble in an organic solvent but not, or sparingly, in an aqueous solvent. Includes fatty acids; neutral fats, other fatty-acid esters, and soaps; long-chain (fatty) alcohols and waxes; sphingoids and other long-chain bases; glycolipids, phospholipids and sphingolipids; and carotenes, polyprenols, sterols, terpenes and other isopren…
GO:0007154	cell communication	SantaPola - BW	-4	NA	NA	NA	NA	1	5	NA	NA	Any process that mediates interactions between a cell and its surroundings. Encompasses interactions such as signaling or attachment between one cell and another cell, between a cell and an extracellular matrix, or between a cell and any other aspect of its environment.
GO:0005975	carbohydrate metabolic process	Adra - FW	-5	3	8	NA	NA	NA	NA	NA	NA	The chemical reactions and pathways involving carbohydrates, any of a group of organic compounds based of the general formula Cx(H2O)y.
GO:0006955	immune response	Adra - FW	-5	2	7	NA	NA	NA	NA	NA	NA	Any immune system process that functions in the calibrated response of an organism to a potential internal or invasive threat.
GO:0007166	cell surface receptor signaling pathway	SantaPola - BW	-5	NA	NA	NA	NA	1	6	NA	NA	The series of molecular signals initiated by an extracellular ligand binding to a receptor located on the cell surface. The pathway ends with regulation of a downstream cellular process, e.g. transcription.
GO:0007155	cell adhesion	SantaPola - BW	-6	NA	NA	NA	NA	2	8	NA	NA	The attachment of a cell, either to another cell or to an underlying substrate such as the extracellular matrix, via cell adhesion molecules.
GO:0005975	carbohydrate metabolic process	SantaPola - BW	-7	NA	NA	NA	NA	2	9	NA	NA	The chemical reactions and pathways involving carbohydrates, any of a group of organic compounds based of the general formula Cx(H2O)y.
GO:0006811	ion transport	SantaPola - BW	-7	NA	NA	NA	NA	3	10	NA	NA	The directed movement of a monoatomic ion into, out of or within a cell, or between cells, by means of some agent such as a transporter or pore. Monatomic ions (also called simple ions) are ions consisting of exactly one atom.
GO:0006955	immune response	SantaPola - BW	-7	NA	NA	NA	NA	1	8	NA	NA	Any immune system process that functions in the calibrated response of an organism to a potential internal or invasive threat.
GO:0007165	signal transduction	SantaPola - BW	-7	NA	NA	NA	NA	2	9	NA	NA	The cellular process in which a signal is conveyed to trigger a change in the activity or state of a cell. Signal transduction begins with reception of a signal (e.g. a ligand binding to a receptor or receptor activation by a stimulus such as light), or for signal transduction in the absence of ligand, signal-withdrawal or the activity of a constitutively active receptor. Signal transduction ends…
GO:0006811	ion transport	Adra - FW	-11	1	12	NA	NA	NA	NA	NA	NA	The directed movement of a monoatomic ion into, out of or within a cell, or between cells, by means of some agent such as a transporter or pore. Monatomic ions (also called simple ions) are ions consisting of exactly one atom.
GO:0007186	G protein-coupled receptor signaling pathway	SantaPola - BW	-12	NA	NA	NA	NA	4	16	NA	NA	The series of molecular signals initiated by a ligand binding to its receptor, in which the activated receptor promotes the exchange of GDP for GTP on the alpha-subunit of an associated heterotrimeric G-protein complex. The GTP-bound activated alpha-G-protein then dissociates from the beta- and gamma-subunits to further transmit the signal within the cell. The pathway begins with receptor-ligand …
GO:0006468	protein phosphorylation	Adra - FW	-15	1	16	NA	NA	NA	NA	NA	NA	The process of introducing a phosphate group on to a protein.
GO:0006468	protein phosphorylation	SantaPola - BW	-15	NA	NA	NA	NA	1	16	NA	NA	The process of introducing a phosphate group on to a protein.
GO:0006313	transposition, DNA-mediated	Adra - FW	-17	2	19	NA	NA	NA	NA	NA	NA	A type of transposition in which a transposable element (transposon) is moved to another part of a genome, either by a cut-and-paste mechanism or a replicative mechanism.
GO:0006313	transposition, DNA-mediated	SantaPola - BW	-17	NA	NA	NA	NA	2	19	NA	NA	A type of transposition in which a transposable element (transposon) is moved to another part of a genome, either by a cut-and-paste mechanism or a replicative mechanism.
GO:0006355	regulation of transcription, DNA-templated	SantaPola - BW	-23	NA	NA	NA	NA	2	25	NA	NA	Any process that modulates the frequency, rate or extent of cellular DNA-templated transcription.
GO:0006355	regulation of transcription, DNA-templated	Adra - FW	-23	2	25	NA	NA	NA	NA	NA	NA	Any process that modulates the frequency, rate or extent of cellular DNA-templated transcription.
GO:0006508	proteolysis	Adra - FW	-25	6	31	NA	NA	NA	NA	NA	NA	The hydrolysis of proteins into smaller polypeptides and/or amino acids by cleavage of their peptide bonds.
GO:0006508	proteolysis	SantaPola - BW	-27	NA	NA	NA	NA	5	32	NA	NA	The hydrolysis of proteins into smaller polypeptides and/or amino acids by cleavage of their peptide bonds.
GO:0015074	DNA integration	Adra - FW	-30	15	45	NA	NA	NA	NA	NA	NA	The process in which a DNA segment is incorporated into another, usually larger, DNA molecule such as a chromosome.
GO:0055085	transmembrane transport	SantaPola - BW	-36	NA	NA	NA	NA	5	41	NA	NA	The process in which a solute is transported across a lipid bilayer, from one side of a membrane to the other.
GO:0055085	transmembrane transport	Adra - FW	-42	2	44	NA	NA	NA	NA	NA	NA	The process in which a solute is transported across a lipid bilayer, from one side of a membrane to the other.
GO:0015074	DNA integration	SantaPola - BW	-48	NA	NA	NA	NA	6	54	NA	NA	The process in which a DNA segment is incorporated into another, usually larger, DNA molecule such as a chromosome.

## Sheet: Celular Component GIT
id	name	Population	Difference	With_Adra - FW	Without_Adra - FW	With_Cabanes - BW	Without_Cabanes - BW	With_SantaPola - BW	Without_SantaPola - BW	With_March - SW	Without_March - SW	definition
go_component:GO:0016021	integral component of membrane	March - SW	74	NA	NA	NA	NA	NA	NA	79	5	NA
go_component:GO:0016021	integral component of membrane	Cabanes - BW	66	NA	NA	75	9	NA	NA	NA	NA	NA
go_component:GO:0016020	membrane	March - SW	62	NA	NA	NA	NA	NA	NA	64	2	NA
go_component:GO:0016020	membrane	Cabanes - BW	44	NA	NA	55	11	NA	NA	NA	NA	NA
go_component:GO:0005634	nucleus	Cabanes - BW	18	NA	NA	20	2	NA	NA	NA	NA	NA
go_component:GO:0005576	extracellular region	Cabanes - BW	17	NA	NA	20	3	NA	NA	NA	NA	NA
go_component:GO:0005576	extracellular region	March - SW	15	NA	NA	NA	NA	NA	NA	19	4	NA
go_component:GO:0005737	cytoplasm	Cabanes - BW	8	NA	NA	9	1	NA	NA	NA	NA	NA
go_component:GO:0005737	cytoplasm	March - SW	8	NA	NA	NA	NA	NA	NA	9	1	NA
go_component:GO:0005887	integral component of plasma membrane	Cabanes - BW	5	NA	NA	7	2	NA	NA	NA	NA	NA
go_component:GO:0005887	integral component of plasma membrane	Adra - FW	-7	1	8	NA	NA	NA	NA	NA	NA	NA
go_component:GO:0005887	integral component of plasma membrane	SantaPola - BW	-7	NA	NA	NA	NA	1	8	NA	NA	NA
go_component:GO:0005737	cytoplasm	Adra - FW	-8	1	9	NA	NA	NA	NA	NA	NA	NA
go_component:GO:0005737	cytoplasm	SantaPola - BW	-8	NA	NA	NA	NA	1	9	NA	NA	NA
go_component:GO:0005576	extracellular region	Adra - FW	-13	5	18	NA	NA	NA	NA	NA	NA	NA
go_component:GO:0005576	extracellular region	SantaPola - BW	-19	NA	NA	NA	NA	2	21	NA	NA	NA
go_component:GO:0005634	nucleus	Adra - FW	-20	1	21	NA	NA	NA	NA	NA	NA	NA
go_component:GO:0005634	nucleus	SantaPola - BW	-20	NA	NA	NA	NA	1	21	NA	NA	NA
go_component:GO:0016020	membrane	SantaPola - BW	-48	NA	NA	NA	NA	9	57	NA	NA	NA
go_component:GO:0016020	membrane	Adra - FW	-58	4	62	NA	NA	NA	NA	NA	NA	NA
go_component:GO:0016021	integral component of membrane	SantaPola - BW	-68	NA	NA	NA	NA	8	76	NA	NA	NA
go_component:GO:0016021	integral component of membrane	Adra - FW	-72	6	78	NA	NA	NA	NA	NA	NA	NA
